# Supplementary material for: Aryl radical-mediated N-heterocyclic carbene catalysis
Source: PubMed Central journal article supplement (PMC8219674; doi:10.1038/s41467-021-24144-2), 2021-06-22
Supplement: 41467_2021_24144_MOESM1_ESM.pdf [file 41467_2021_24144_MOESM1_ESM.pdf]

# Aryl Radical-Mediated N-Heterocyclic Carbene Catalysis

Yuki Matsuki,<sup>1</sup> Nagisa Ohnishi,<sup>1</sup> Yuki Kakeno,<sup>1</sup> Shunsuke Takemoto,<sup>1</sup> Takuya Ishii,<sup>1</sup> Kazunori Nagao,<sup>1\*</sup> and Hirohisa Ohmiya<sup>1,2\*</sup>

<sup>1</sup> Division of Pharmaceutical Sciences, Graduate School of Medical Sciences, Kanazawa University, Kakuma-machi, Kanazawa 920-1192, Japan

<sup>2</sup> JST, PRESTO, 4-1-8 Honcho, Kawaguchi, Saitama, 332-0012, Japan

These authors contributed equally: Yuki Matsuki, Nagisa Ohnishi

\*E-mail: Kazunori Nagao : nkazunori@p.kanazawa-u.ac.jp

Hirohisa Ohmiya: ohmiya@p.kanazawa-u.ac.jp

## Table of Contents

### ■ Supplementary Methods ■

|                                                                                                                                   |           |
|-----------------------------------------------------------------------------------------------------------------------------------|-----------|
| 1. Instrumentation and Chemicals                                                                                                  | S2        |
| 2. Characterization Data for Aryl Thianthrenium Salt                                                                              | S3        |
| 3. Procedure for Intramolecular Arylacylation of Alkenes                                                                          | S3        |
| 4. Characterization Data for Cyclized Product                                                                                     | S4        |
| 5. Procedure for Intermolecular Arylacylation of Styrenes                                                                         | S4        |
| 6. Characterization Data for Three-Component Coupling Products                                                                    | S4–S14    |
| 7. Characterization Data for Amide Substrates                                                                                     | S15–S18   |
| 8. Procedure for C(sp <sup>3</sup> )–H Acylation of Secondary Amides                                                              | S18       |
| 9. Characterization Data for $\alpha$ -Aminoketones                                                                               | S19–S31   |
| 10. Effects of Reaction Components on Intermolecular Arylacylation of Styrenes                                                    | S32       |
| 11. Effects of Reaction Components on C–H Acylation                                                                               | S32       |
| 12. Cyclic Voltammetry (CV) Experiments                                                                                           | S33–S34   |
| 13. Computational Studies                                                                                                         |           |
| 13.1. Calculation of Bond Dissociation Energy (BDE)                                                                               | S34–S40   |
| 13.2. Calculation of Gibbs Energy Barrier on $\alpha$ -Amino C(sp <sup>3</sup> )–H Abstraction Step ( $\Delta G^\ddagger_{C-H}$ ) | S40–S48   |
| 14. Deprotection of Directing Group                                                                                               | S49–50    |
| 15. UV-Vis Absorption Measurement                                                                                                 | S51       |
| ■ NMR Spectra ■                                                                                                                   | S52–S203  |
| ■ Supplementary References ■                                                                                                      | S204–S205 |

## ■ Supplementary Methods ■

### 1. Instrumentation and Chemicals

NMR spectra were recorded on a JNM-ECS400, operating at 400 MHz for  $^1\text{H}$  NMR and 100.5 MHz for  $^{13}\text{C}$  NMR, and JNM-ECA600, operating at 600 MHz for  $^1\text{H}$  NMR and 150.9 MHz for  $^{13}\text{C}$  NMR, and Bruker AVANCE NEO 400N spectrometer, operating at 400 MHz for  $^1\text{H}$  NMR, 100.6 MHz for  $^{13}\text{C}$  NMR. Chemical shifts are reported in  $\delta$  ppm. DART-Mass and ESI-Mass spectra were measured with JMS-T100TD (JEOL Ltd.). TLC analyses were performed on commercial glass plates bearing 0.25-mm layer of Merck Silica gel 60F<sub>254</sub>. Silica gel (Wakosil<sup>®</sup> 60, 64~210  $\mu\text{m}$ ) was used for column chromatography. Biotage Selekt and LaboACE LC-5060 (for Gel Permeation Chromatography) were used for purification. IR spectra were measured with a Thermo Scientific iD7 ATR Accessory for the Thermo Scientific Nicolet iS5 FT-IR Spectrometer. Melting points were measured on a Stanford Research Systems MPA100.

All reactions were carried out under nitrogen atmosphere. Materials were obtained from commercial suppliers or prepared according to standard procedures unless otherwise noted.  $\text{Cs}_2\text{CO}_3$  was purchased from FUJIFILM Wako Pure Chemical Co., stored under nitrogen, and used as received. DMSO was purchased from FUJIFILM Wako Pure Chemical Co., stored under nitrogen, and used as received. Thiazolium salt **N1** and **N2** were prepared by the reported procedure.<sup>1</sup> Aldehydes **1a**, **1e** and **1h** were purchased from Nacalai Tesque Inc., **1b**, **1d**, **1p** and **1q** were purchased from FUJIFILM Wako Pure Chemical Co., **1c**, **1f**, **1g**, **1i**, **1j**, **1k**, **1l**, and **1m** were purchased from Tokyo Chemical Industry Co., **1n** and **1o** were purchased from Sigma-Aldrich Japan., stored under nitrogen, and used as received. Styrene **4a** was purchased from Tokyo Chemical Industry Co., Styrene derivatives **4b**–**4e** were prepared by Wittig reaction from the corresponding aldehydes. Aryl iodides **5a** and **5g** were purchased from FUJIFILM Wako Pure Chemical Co., **5b** was purchased from Sigma-Aldrich Japan., **5c** was purchased from Combi-Blocks., stored under nitrogen, and used as received. Aryl iodides **2a**, **5d**–**5f** and **5h**–**5l** were prepared by the reported procedure.<sup>2–7</sup> The aryl thianthrenium salts were prepared according to the reported procedure.<sup>8</sup> Amide substrates **7a**, **7b**, **7e**, **7h**, **7i** and **7a-A–C** were prepared from the corresponding secondary amines and carboxylic acids through condensation reactions with pivaloyl chloride.<sup>9</sup> **7c**, **7d**, **7f** and **7g** were prepared from the corresponding secondary amines and carboxylic acids through condensation reactions with pivaloyl chloride.<sup>10</sup>

## 2. Characterization Data for Aryl Thianthrenium Salt

### 5-(4-Methoxyphenyl)-5H-thianthren-5-ium 2,2,2-trifluoroacetate (5b-S)

Under an ambient atmosphere, a 20 ml two-necked round-bottom flask was charged sequentially with anisole (91.2 mg, 0.85 mmol), thianthrene-S-oxide (197 mg, 0.85 mmol), and dry MeCN (3.4 ml, 0.25 M). After all solids had dissolved, the solution was cooled to  $-78\text{ }^{\circ}\text{C}$ , and trifluoroacetic anhydride (0.36 ml, 0.54 g, 2.55 mmol) was added in one portion at  $-78\text{ }^{\circ}\text{C}$ . The mixture was allowed to warm to  $0\text{ }^{\circ}\text{C}$  over a period of 2 h. After stirring overnight, the solution was diluted with DCM (8.5 ml) and poured into a separatory funnel. The organic layer was washed with 85 ml water. The solvent was removed under reduced pressure, and the oily residue was purified by flash chromatography on silica gel (Biotage Selekt, 90:10, DCM/MeOH). The oily precipitate was dried in vacuo to afford the desired thianthrenium salt **5b-S** (219 mg, 59 %) as highly viscous and colorless oil.

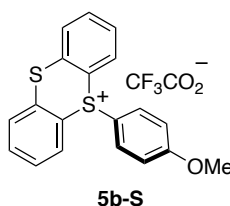

Colorless oil. **IR** (neat) 705, 758, 796, 828, 1020, 1123, 1178, 1264  $\text{cm}^{-1}$ .  **$^1\text{H}$  NMR** (400 MHz,  $\text{CDCl}_3$ )  $\delta$  3.80 (s, 3H), 6.94 (d,  $J = 9.2$  Hz, 2H), 7.25 (d,  $J = 6.8$  Hz, 2H), 7.73–7.83 (m, 6H), 8.53 (d,  $J = 7.8$  Hz, 2H)  **$^{13}\text{C}$  NMR** (150.9 MHz,  $\text{CDCl}_3$ )  $\delta$  55.7, 113.6, 116.1 (q,  $J_{\text{C-F}} = 290$  Hz), 116.4, 119.2, 130.0, 130.2, 130.3, 134.2, 134.6, 136.0, 160.3 (q,  $J_{\text{C-F}} = 27.2$  Hz) 163.6. **HRMS-ESI** ( $m/z$ ):  $[\text{M}-\text{CF}_3\text{CO}_2]^+$  calcd for  $\text{C}_{19}\text{H}_{15}\text{OS}_2$ , 323.0559; found, 323.0553.

## 3. Procedure for Intramolecular Arylacylation of Alkenes

**The reaction in Table 1, entry 1 is representative.** Thiazolium salt **N1** (8.3 mg, 0.02 mmol) was placed in a schlenk tube containing a magnetic stirring bar. The vial was sealed with a Teflon<sup>®</sup>-coated silicon rubber septum, and then the vial was evacuated and filled with nitrogen. Degassed DMSO (400  $\mu\text{L}$ ) was added to the vial. Next, benzaldehyde **1a** (30.5  $\mu\text{L}$ , 0.3 mmol) and 1-(cinnamyloxy)-2-iodobenzene **2a** (67.2 mg, 0.2 mmol) were added. Then,  $\text{Cs}_2\text{CO}_3$  (71.7 mg, 0.22 mmol) was added. After 12 h stirring at  $60\text{ }^{\circ}\text{C}$ , the reaction mixture was treated with saturated  $\text{NH}_4\text{Cl}$  aqueous solution (400  $\mu\text{L}$ ), then extracted with diethylether (4 times) and dried over sodium sulfate. After filtration, the resulting solution was evaporated under reduced pressure. After volatiles were removed under reduced pressure, flash column chromatography on silica gel (100:0–90:10, hexane/EtOAc) gave **3aa** (24.5 mg, 0.08 mmol) in 39 % yield.

#### 4. Characterization Data for Cyclized Product

##### 2-(2,3-Dihydrobenzofuran-3-yl)-1,2-diphenylethan-1-one (3aa)

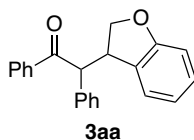

The product **3aa** was purified by flash chromatography on silica gel (Biotage Selekt, 100:0–90:10, hexane/EtOAc) (Table 1, entry 1, 24.5 mg, 0.08 mmol, 39% isolated yield). The ratio (1:1) of diastereomers was determined by  $^1\text{H-NMR}$  analysis. White solid. **M.p.** 120–126 °C. **IR** (neat) 698, 749, 1232, 1449, 1460, 1480, 1677, 3028, 3059  $\text{cm}^{-1}$ .  **$^1\text{H NMR}$**  (400 MHz,  $\text{CDCl}_3$ )  $\delta$  4.20–4.38 (m, 2H), 4.45–4.51 (m,  $0.50 \times 1\text{H}$ ), 4.70 (d,  $J = 10.4$  Hz,  $0.50 \times 1\text{H}$ ), 4.78 (m, 1H), 5.86 (d,  $J = 7.2$  Hz,  $0.50 \times 1\text{H}$ ), 6.55 (t,  $J = 7.2$  Hz,  $0.50 \times 1\text{H}$ ), 6.73–6.80 (m,  $0.50 \times 1\text{H} + 1\text{H}$ ), 7.03–7.45 (m,  $0.50 \times 1\text{H} + 9\text{H}$ ), 7.89–7.96 (m, 2H).  **$^{13}\text{C NMR}$**  (100.6 MHz,  $\text{CDCl}_3$ )  $\delta$  44.7, 45.4, 58.0, 59.1, 68.0, 74.0, 109.4, 109.7, 119.7, 120.5, 125.5, 126.0, 126.3, 126.7, 127.7, 127.8, 127.8, 128.3, 128.6, 128.6, 128.7, 128.8, 128.9, 129.0, 129.1, 129.3, 133.1, 133.3, 136.3, 136.6, 136.7, 136.8, 160.2, 160.3, 199.0, 199.0. **HRMS–EI** ( $m/z$ ):  $[\text{M}]^+$  calcd for  $\text{C}_{22}\text{H}_{18}\text{O}_2$ , 314.1307; found, 314.1310.

#### 5. Procedure for Intermolecular Arylacylation of Styrenes

The reaction to produce **6aag** in Fig. 2 is representative. Thiazolium salt **N2** (23.9 mg, 0.06 mmol) was placed in a Schlenk tube containing a magnetic stirring bar. The tube was sealed with a Teflon<sup>®</sup>-coated silicon rubber septum, and then evacuated and filled with nitrogen. Degassed DMSO (400  $\mu\text{L}$ ) and  $\text{H}_2\text{O}$  (3.6  $\mu\text{L}$ , 0.2 mmol) were added to the tube. Next, benzaldehyde (**1a**) (20.3  $\mu\text{L}$ , 0.2 mmol), styrene (**4a**) (229  $\mu\text{L}$ , 2.0 mmol) and 2-iodothiophene (**5g**) (38.2  $\mu\text{L}$ , 0.3 mmol) were added, followed by  $\text{Cs}_2\text{CO}_3$  (78.2 mg, 0.24 mmol). After 4 h stirring at 80 °C, the reaction mixture was treated with saturated  $\text{NH}_4\text{Cl}$  aqueous solution (400  $\mu\text{L}$ ), then extracted with diethyl ether (4 times) and dried over sodium sulfate. After filtration, the resulting solution was evaporated under reduced pressure. After the volatiles were removed under reduced pressure, flash column chromatography on silica gel (100:0–90:10, hexane/EtOAc) gave **6aag** (40.3 mg, 0.14 mmol) in 69% yield.

#### 6. Characterization Data for Three-Component Coupling Products

##### 1,2,3-Triphenylpropan-1-one (6aaa)

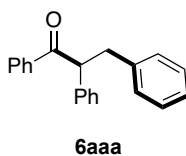

The product **6aaa** was purified by flash chromatography on silica gel (Biotage Selekt, 100:0–90:10, hexane/EtOAc) (Fig. 2, 19.5 mg, 0.07 mmol, 34% isolated yield). White solid. The spectrum data of **6aaa** was consistent with the literature.<sup>11</sup>

### 3-(4-Methoxyphenyl)-1,2-diphenylpropan-1-one (6aab)

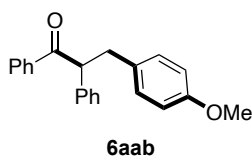

The product **6aab** was purified by flash chromatography on silica gel (Biotage Selekt, 100:0–80:20, hexane/EtOAc) (Fig. 2, with aryl iodide **5b**, 9.5 mg, 0.03 mmol, 15% isolated yield; with aryl thianthrenium salt **5b-S**, 15.8 mg, 0.05 mmol, 25% isolated yield;). The spectrum data of **6aab** was consistent with the literature.<sup>11</sup>

### 3-(2-Bromo-4-fluorophenyl)-1,2-diphenylpropan-1-one (6aac)

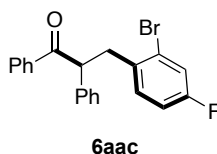

The product **6aac** was purified by flash chromatography on silica gel (Biotage Selekt, 100:0–90:10, hexane/EtOAc) (Fig. 2, 52.7 mg, 0.14 mmol, 69% isolated yield). Pale yellow oil. **IR** (neat) 569, 694, 754, 858, 1030, 1176, 1227, 1446, 1484, 1679  $\text{cm}^{-1}$ . **<sup>1</sup>H NMR** (600 MHz,  $\text{CDCl}_3$ )  $\delta$  3.13 (dd,  $J = 13.2, 7.2$  Hz, 1H), 3.62 (dd,  $J = 13.2, 7.2$  Hz, 1H), 4.98 (t,  $J = 7.2$  Hz, 1H), 6.79 (m, 1H), 6.98 (t,  $J = 7.2$  Hz, 1H), 7.20 (m, 1H), 7.23–7.27 (m, 5H), 7.34 (t,  $J = 7.8$  Hz, 1H), 7.45 (t,  $J = 7.2$  Hz, 1H), 7.89 (d,  $J = 7.8$  Hz, 2H). **<sup>13</sup>C NMR** (150.9 MHz,  $\text{CDCl}_3$ )  $\delta$  39.5, 53.2, 114.2 (d,  $J = 20.1$  Hz), 119.7 (d,  $J_{\text{C-F}} = 24.6$  Hz), 124.2 (d,  $J_{\text{C-F}} = 8.7$  Hz), 127.3, 128.1, 128.5, 128.7, 129.0, 132.8 (d,  $J_{\text{C-F}} = 7.2$  Hz), 133.0, 134.6 (d,  $J_{\text{C-F}} = 2.9$  Hz), 136.5, 138.7, 161.0 (d,  $J_{\text{C-F}} = 248.6$  Hz), 198.8. **<sup>19</sup>F NMR** (376.5 MHz,  $\text{CDCl}_3$ )  $\delta$  -114.5. **HRMS–DART** ( $m/z$ ):  $[\text{M}^+ \text{NH}_4]^+$  calcd for  $\text{C}_{21}\text{H}_{20}\text{BrFNO}$ , 400.0707; found, 400.0702.

### 3-(Naphthalen-1-yl)-1,2-diphenylpropan-1-one (6aad)

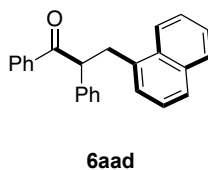

The product **6aad** was purified by flash chromatography on silica gel (Biotage Selekt, 100:0–90:10, hexane/EtOAc) (Fig. 2, 35.0 mg, 0.10 mmol, 52% isolated yield). White solid. The spectrum data of **6aad** was consistent with the literature.<sup>11</sup>

### 3-(Anthracen-9-yl)-1,2-diphenylpropan-1-one (6aae)

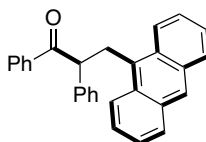

6aae

The product **6aae** was purified by flash chromatography on silica gel (Biotage Selekt, 100:0–90:10, hexane/EtOAc) (Fig. 2, 50.2 mg, 0.13 mmol, 65% isolated yield). Pale yellow solid. **M.p.** 156–162 °C. **IR** (neat) 699, 732, 756, 1205, 1342, 1446, 1597, 1678  $\text{cm}^{-1}$ .  **$^1\text{H NMR}$**  (400 MHz,  $\text{CDCl}_3$ )  $\delta$  4.09 (dd,  $J = 14.4, 6.4$  Hz, 1H), 4.59 (dd,  $J = 14.4, 6.4$  Hz, 1H), 5.02 (t,  $J = 6.4$  Hz, 1H), 7.03–7.10 (m, 5H), 7.22–7.26 (m, 2H), 7.33–7.41 (m, 5H), 7.78 (d,  $J = 7.2$  Hz, 2H), 7.95 (d,  $J = 9.2$  Hz, 2H), 8.03 (d,  $J = 8.4$  Hz, 2H), 8.32 (s, 1H).  **$^{13}\text{C NMR}$**  (100.5 MHz,  $\text{CDCl}_3$ )  $\delta$  31.5, 55.4, 124.5, 124.7, 125.4, 126.4, 127.1, 128.2, 128.4, 128.7, 128.8, 129.0, 130.1, 131.4, 132.1, 132.8, 136.5, 139.2, 199.7. **HRMS–DART** ( $m/z$ ):  $[\text{M}^+ \text{NH}_4]^+$  calcd for  $\text{C}_{29}\text{H}_{26}\text{NO}$ , 404.2009; found, 404.2011.

### 1,2-Diphenyl-3-(pyren-1-yl)propan-1-one (6aaf)

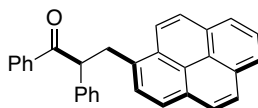

6aaf

The product **6aaf** was purified by flash chromatography on silica gel (Biotage Selekt, 100:0–90:10, hexane/EtOAc) (Fig. 2, 45.1 mg, 0.11 mmol, 55% isolated yield). Pale yellow solid. **M.p.** 146–152 °C. **IR** (neat) 683, 697, 720, 754, 843, 1182, 1447, 1597, 1678  $\text{cm}^{-1}$ .  **$^1\text{H NMR}$**  (600 MHz,  $\text{CDCl}_3$ )  $\delta$  3.78 (dd,  $J = 13.8, 6.6$  Hz, 1H), 4.33 (dd,  $J = 13.8, 6.6$  Hz, 1H), 5.09 (t,  $J = 6.6$  Hz, 1H), 7.18–7.28 (m, 7H), 7.37 (t,  $J = 7.2$  Hz, 1H), 7.65 (d,  $J = 7.8$  Hz, 1H), 7.85 (d,  $J = 6.6$  Hz, 2H), 7.94–8.00 (m, 4H), 8.09 (d,  $J = 9.0$  Hz, 1H), 8.15 (t,  $J = 7.8$  Hz, 2H), 8.25 (d,  $J = 9.0$  Hz, 1H).  **$^{13}\text{C NMR}$**  (150.9 MHz,  $\text{CDCl}_3$ )  $\delta$  37.4, 55.7, 123.1, 124.6, 124.8, 125.0, 125.8, 126.7, 127.2, 127.5, 128.2, 128.4, 128.7, 128.8, 129.0, 130.0, 130.8, 131.3, 132.8, 133.8, 136.6, 139.2, 199.3. **HRMS–DART** ( $m/z$ ):  $[\text{M}^+ \text{NH}_4]^+$  calcd for  $\text{C}_{31}\text{H}_{26}\text{NO}$ , 428.2009; found, 428.2006.

### 1,2-Diphenyl-3-(thiophen-2-yl)propan-1-one (6aag)

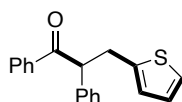

6aag

The product **6aag** was purified by flash chromatography on silica gel (Biotage Selekt, 100:0–90:10, hexane/EtOAc) (Fig. 2, 40.3 mg, 0.14 mmol, 69% isolated yield). Pale yellow solid. The spectrum data of **6aag** was consistent with the literature.<sup>11</sup>

### 1,2-Diphenyl-3-(thiophen-3-yl)propan-1-one (6aah)

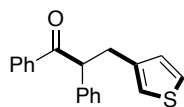

6aah

The product **6aah** was purified by flash chromatography on silica gel (Biotage Selekt, 100:0–90:10, hexane/EtOAc) (Fig. 2, 19.9 mg, 0.07 mmol, 34% isolated yield). White solid. **M.p.** 114–117 °C. **IR** (neat) 699, 758, 776, 1251, 1447, 1492, 1597, 1679  $\text{cm}^{-1}$ .  **$^1\text{H}$  NMR** (600 MHz,  $\text{CDCl}_3$ )  $\delta$  3.09 (dd,  $J = 14.4, 7.2$  Hz, 1H), 3.59 (dd,  $J = 14.4, 7.2$  Hz, 1H), 4.80 (t,  $J = 7.2$  Hz, 1H), 6.81–6.83 (m, 2H), 7.16 (dd,  $J = 4.8, 3.0$  Hz, 1H), 7.20 (m, 1H), 7.26–7.29 (m, 4H), 7.36 (t,  $J = 7.8$  Hz, 2H), 7.46 (t,  $J = 7.2$  Hz, 1H), 7.91 (d,  $J = 8.4$  Hz, 2H).  **$^{13}\text{C}$  NMR** (150.9 MHz,  $\text{CDCl}_3$ )  $\delta$  34.5, 55.2, 121.6, 125.1, 127.2, 128.2, 128.5, 128.5, 128.7, 128.9, 132.9, 136.7, 139.1, 140.0, 199.2. **HRMS–DART** ( $m/z$ ):  $[\text{M} + \text{NH}_4]^+$  calcd for  $\text{C}_{19}\text{H}_{20}\text{NOS}$ , 310.1260; found, 310.1259.

### 3-(Benzo[b]thiophen-2-yl)-1,2-diphenylpropan-1-one (6aai)

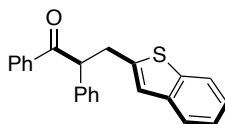

6aai

The product **6aai** was purified by flash chromatography on silica gel (Biotage Selekt, 100:0–90:10, hexane/EtOAc) (Fig. 2, 44.5 mg, 0.13 mmol, 65% isolated yield). Pale yellow solid. **M.p.** 124–128 °C. **IR** (neat) 698, 726, 747, 1176, 1244, 1435, 1447, 1597, 1678  $\text{cm}^{-1}$ .  **$^1\text{H}$  NMR** (400 MHz,  $\text{CDCl}_3$ )  $\delta$  3.34 (dd,  $J = 14.4, 6.8$  Hz, 1H), 3.89 (dd,  $J = 14.4, 6.8$  Hz, 1H), 4.95 (t,  $J = 6.8$  Hz, 1H), 6.92 (s, 1H), 7.20–7.38 (m, 9H), 7.46 (t,  $J = 7.2$  Hz, 1H), 7.59 (d,  $J = 6.8$  Hz, 1H), 7.70 (d,  $J = 7.6$  Hz, 1H), 7.95 (d,  $J = 7.6$  Hz, 2H).  **$^{13}\text{C}$  NMR** (150.9 MHz,  $\text{CDCl}_3$ )  $\delta$  35.1, 55.5, 122.0, 122.3, 122.9, 123.6, 124.0, 127.4, 128.2, 128.5, 128.8, 129.1, 133.0, 136.4, 138.5, 139.5, 139.9, 143.2, 198.5. **HRMS–DART** ( $m/z$ ):  $[\text{M} + \text{NH}_4]^+$  calcd for  $\text{C}_{23}\text{H}_{22}\text{NOS}$ , 360.1417; found, 360.1411.

### 3-(Benzofuran-2-yl)-1,2-diphenylpropan-1-one (6aaj)

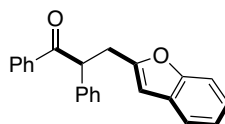

6aaj

The product **6aaj** was purified by flash chromatography on silica gel (Biotage Selekt, 100:0–90:10, hexane/EtOAc) (Fig. 2, 35.9 mg, 0.11 mmol, 55% isolated yield). Yellow solid. **M.p.** 64–69 °C. **IR** (neat) 696, 751, 948, 1178, 1252, 1454, 1597, 1681  $\text{cm}^{-1}$ .  **$^1\text{H}$  NMR** (400 MHz,  $\text{CDCl}_3$ )  $\delta$  3.22 (dd,  $J = 15.2, 7.2$  Hz, 1H), 3.73 (dd,  $J = 15.2, 7.2$  Hz, 1H), 5.12 (t,  $J = 7.2$  Hz, 1H), 6.27 (s, 1H), 7.11–7.20 (m, 3H), 7.24–7.30 (m, 4H), 7.34–7.40 (m, 4H), 7.45 (t,  $J = 7.2$  Hz, 1H), 7.96 (d,  $J = 6.8$  Hz, 2H).  **$^{13}\text{C}$  NMR** (100.5 MHz,  $\text{CDCl}_3$ )  $\delta$  32.9, 52.1, 103.7, 110.7, 120.4, 122.4, 123.3, 127.4, 128.0, 128.5, 128.7, 128.8, 129.0, 133.0, 136.3, 138.5, 154.6, 156.4, 198.4. **HRMS–DART** ( $m/z$ ):  $[\text{M} + \text{NH}_4]^+$  calcd for  $\text{C}_{23}\text{H}_{22}\text{NO}_2$ , 344.1645; found, 344.1647.

### 1,2-Diphenyl-3-(thiazol-2-yl)propan-1-one (6aak)

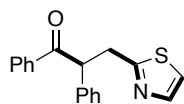

6aak

The product **6aak** was purified by flash chromatography on silica gel (Biotage Selekt, 100:0–90:10, hexane/EtOAc) (Fig. 2, 29.3 mg, 0.10 mmol, 50% isolated yield). Pale yellow solid. **M.p.** 106–111 °C. **IR** (neat) 698, 758, 1107, 1248, 1447, 1496, 1597, 1680  $\text{cm}^{-1}$ .  **$^1\text{H}$  NMR** (600 MHz,  $\text{CDCl}_3$ )  $\delta$  3.44 (dd,  $J = 15.0, 7.2$  Hz, 1H), 3.97 (dd,  $J = 15.0, 7.2$  Hz, 1H), 5.28 (t,  $J = 7.2$  Hz, 1H), 7.11 (d,  $J = 3.6$  Hz, 1H), 7.21 (m, 1H), 7.26–7.31 (m, 4H), 7.36 (t,  $J = 7.8$  Hz, 2H), 7.46 (t,  $J = 7.2$  Hz, 1H), 7.63 (d,  $J = 3.6$  Hz, 1H), 7.96 (d,  $J = 7.8$  Hz, 2H).  **$^{13}\text{C}$  NMR** (150.9 MHz,  $\text{CDCl}_3$ )  $\delta$  37.0, 53.5, 118.4, 127.6, 128.1, 128.3, 128.4, 128.6, 128.8, 128.9, 129.0, 129.2, 132.9, 136.2, 138.2, 142.2, 168.0, 198.4. **HRMS–DART** ( $m/z$ ):  $[\text{M} + \text{NH}_4]^+$  calcd for  $\text{C}_{18}\text{H}_{19}\text{N}_2\text{OS}$ , 294.0947; found, 294.0945.

### 3-(Benzo[d]thiazol-2-yl)-1,2-diphenylpropan-1-one (6aal)

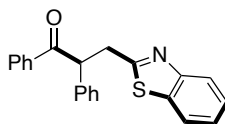

6aal

The product **6aal** was purified by flash chromatography on silica gel (Biotage Selekt, 100:0–90:10, hexane/EtOAc) (Fig. 2, 48.7 mg, 0.14 mmol, 71% isolated yield). Light green solid. **M.p.** 91–96 °C. **IR** (neat) 698, 729, 758, 944, 1116, 1241, 1435, 1447, 1597, 1679  $\text{cm}^{-1}$ .  **$^1\text{H}$  NMR** (400 MHz,  $\text{CDCl}_3$ )  $\delta$  3.52 (dd,  $J = 15.2, 7.2$  Hz, 1H), 4.07 (dd,  $J = 15.2, 7.2$  Hz, 1H), 5.39 (t,  $J = 7.2$  Hz, 1H), 7.18–7.47 (m, 10H), 7.76 (d,  $J = 7.6$  Hz, 1H), 7.90 (d,  $J = 7.6$  Hz, 1H), 7.97–7.99 (m, 2H).  **$^{13}\text{C}$  NMR** (100.5 MHz,  $\text{CDCl}_3$ )  $\delta$  38.1, 53.2, 121.4, 122.5, 124.7, 125.7, 127.5, 128.2, 128.5, 128.9, 129.2, 133.0, 135.3, 136.2, 138.1, 153.0, 169.2, 198.2. **HRMS–DART** ( $m/z$ ):  $[\text{M} + \text{H}]^+$  calcd for  $\text{C}_{22}\text{H}_{18}\text{NOS}$ , 344.1104; found, 344.1106.

### 3-(4-Chlorophenyl)-1,2-diphenylpropan-1-one (6aam)

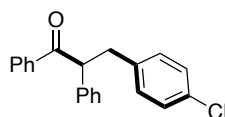

6aam

The product **6aam** was purified by flash chromatography on silica gel (Biotage Selekt, 100:0–90:10, hexane/EtOAc) (Fig. 2, 21.8 mg, 0.07 mmol, 34% isolated yield). The spectrum data of **6aam** was consistent with the literature.<sup>11</sup>



## 2-Phenyl-3-(thiophen-2-yl)-1-(p-tolyl)propan-1-one (6bag)

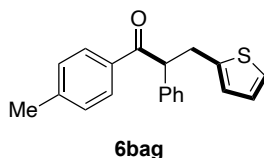

The product **6bag** was purified by flash chromatography on silica gel (Biotage Selekt, 100:0–90:10, hexane/EtOAc) (Fig. 2, 34.3 mg, 0.11 mmol, 56% isolated yield). Yellow solid. **M.p.** 67–71 °C. **IR** (neat) 698, 820, 1174, 1235, 1260, 1604, 1674  $\text{cm}^{-1}$ . **<sup>1</sup>H NMR** (400 MHz,  $\text{CDCl}_3$ )  $\delta$  2.33 (s, 3H), 3.27 (dd,  $J = 14.4, 6.4$  Hz, 1H), 3.78 (dd,  $J = 14.8, 6.4$  Hz, 1H), 4.83 (t,  $J = 6.4$  Hz, 1H), 6.68 (d,  $J = 2.8$  Hz, 1H), 6.80–6.83 (m, 1H), 7.04–7.05 (m, 1H), 7.15 (d,  $J = 8.4$  Hz, 2H), 7.20 (m, 1H), 7.27–7.29 (m, 4H), 7.84 (d,  $J = 8.4$  Hz, 2H). **<sup>13</sup>C NMR** (100.5 MHz,  $\text{CDCl}_3$ )  $\delta$  21.6, 34.1, 55.9, 123.5, 125.6, 126.6, 127.2, 128.2, 128.8, 128.9, 129.2, 134.0, 138.9, 142.2, 143.8, 198.4. **HRMS–DART** ( $m/z$ ):  $[\text{M}+\text{H}]^+$  calcd for  $\text{C}_{20}\text{H}_{19}\text{OS}$ , 307.1151; found, 307.1154.

## 1-[4-(Tert-butyl)phenyl]-2-phenyl-3-(thiophen-2-yl)propan-1-one (6cag)

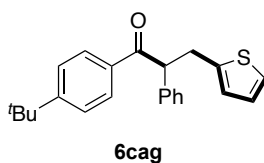

The product **6cag** was purified by flash chromatography on silica gel (Biotage Selekt, 100:0–90:10, hexane/EtOAc) (Fig. 2, 46.0 mg, 0.13 mmol, 66% isolated yield). Pale yellow solid. **M.p.** 86–91 °C. **IR** (neat) 698, 1108, 1237, 1268, 1604, 1677, 2963  $\text{cm}^{-1}$ . **<sup>1</sup>H NMR** (400 MHz,  $\text{CDCl}_3$ )  $\delta$  1.27 (s, 9H), 3.26 (dd,  $J = 14.8, 7.2$  Hz, 1H), 3.78 (dd,  $J = 14.4, 7.2$  Hz, 1H), 4.85 (t,  $J = 7.2$  Hz, 1H), 6.68 (d,  $J = 2.4$  Hz, 1H), 6.82 (m, 1H), 7.05 (m, 1H), 7.21 (m, 1H), 7.25–7.31 (m, 4H), 7.38 (d,  $J = 8.8$  Hz, 2H), 7.89 (d,  $J = 8.8$  Hz, 2H). **<sup>13</sup>C NMR** (150.9 MHz,  $\text{CDCl}_3$ )  $\delta$  31.0, 34.2, 35.0, 55.9, 123.6, 125.5, 125.6, 126.6, 127.3, 128.2, 128.7, 128.9, 133.9, 138.9, 142.2, 156.7, 198.3. **HRMS–DART** ( $m/z$ ):  $[\text{M}+\text{H}]^+$  calcd for  $\text{C}_{23}\text{H}_{25}\text{OS}$ , 349.1621; found, 349.1624.

## 1-(4-Fluorophenyl)-2-phenyl-3-(thiophen-2-yl)propan-1-one (6dag)

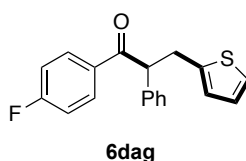

The product **6dag** was purified by flash chromatography on silica gel (Biotage Selekt, 100:0–90:10, hexane/EtOAc) (Fig. 2, 22.3 mg, 0.07 mmol, 36% isolated yield). Yellow oil. **IR** (neat) 569, 695, 838, 1154, 1203, 1228, 1595, 1678  $\text{cm}^{-1}$ . **<sup>1</sup>H NMR** (400 MHz,  $\text{CDCl}_3$ )  $\delta$  3.27 (dd,  $J = 14.8, 7.2$  Hz, 1H), 3.78 (dd,  $J = 14.8, 7.2$  Hz, 1H), 4.79 (t,  $J = 7.2$  Hz, 1H), 6.68 (d,  $J = 2.4$  Hz, 1H), 6.83 (m, 1H), 7.01–7.07 (m, 3H), 7.20–7.31 (m, 5H), 7.94–7.97 (m, 2H). **<sup>13</sup>C NMR** (100.5 MHz,  $\text{CDCl}_3$ )  $\delta$  34.1, 56.1, 123.7, 125.7, 126.7, 127.5, 128.1, 129.1, 131.4 (d,  $J_{\text{C-F}} = 9.6$  Hz), 132.9 (d,  $J_{\text{C-F}} = 2.9$  Hz), 138.5, 141.9, 165.5 (d,  $J_{\text{C-F}} = 255$  Hz), 197.2. **<sup>19</sup>F NMR** (376.5 MHz,  $\text{CDCl}_3$ )  $\delta$  –105.1. **HRMS–DART** ( $m/z$ ):  $[\text{M}+\text{NH}_4]^+$  calcd for  $\text{C}_{19}\text{H}_{19}\text{FNOS}$ , 328.1166; found, 328.1165.

### 1-(4-Bromophenyl)-2-phenyl-3-(thiophen-2-yl)propan-1-one (6eag)

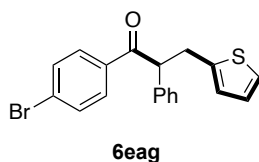

The product **6eag** was purified by flash chromatography on silica gel (Biotage Selekt, 100:0–90:10, hexane/EtOAc) (Fig. 2, 40.0 mg, 0.11 mmol, 54% isolated yield). Pale yellow solid. **M.p.** 89–93 °C. **IR** (neat) 699, 1010, 1071, 1397, 1583, 1680  $\text{cm}^{-1}$ . **<sup>1</sup>H NMR** (400 MHz,  $\text{CDCl}_3$ )  $\delta$  3.26 (dd,  $J = 14.8$ , 7.2 Hz, 1H), 3.78 (dd,  $J = 14.8$ , 7.2 Hz, 1H), 4.77 (t,  $J = 7.2$  Hz, 1H), 6.68 (m, 1H), 6.83 (m, 1H), 7.06 (m, 1H), 7.20–7.31 (m, 5H), 7.48–7.50 (m, 2H), 7.78 (d,  $J = 8.8$  Hz, 2H). **<sup>13</sup>C NMR** (100.5 MHz,  $\text{CDCl}_3$ )  $\delta$  34.0, 56.2, 123.7, 125.7, 126.7, 127.5, 128.1, 128.2, 129.1, 130.2, 131.8, 135.2, 138.3, 141.8, 197.8. **HRMS–DART** ( $m/z$ ):  $[\text{M}+\text{H}]^+$  calcd for  $\text{C}_{19}\text{H}_{16}\text{BrOS}$ , 371.0100; found, 371.0102.

### 2-Phenyl-3-(thiophen-2-yl)-1-[4-(trifluoromethoxy)phenyl]propan-1-one (6fag)

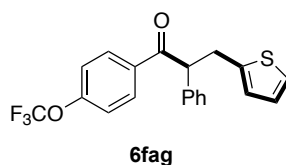

The product **6fag** was purified by flash chromatography on silica gel (Biotage Selekt, 100:0–80:20, hexane/EtOAc) (Fig. 2, 47.4 mg, 0.13 mmol, 63% isolated yield). Pale yellow oil. **IR** (neat) 693, 1014, 1065, 1111, 1124, 1320, 1685  $\text{cm}^{-1}$ . **<sup>1</sup>H NMR** (400 MHz,  $\text{CDCl}_3$ )  $\delta$  3.28 (dd,  $J = 15.2$ , 7.2 Hz, 1H), 3.80 (dd,  $J = 15.2$ , 7.2 Hz, 1H), 4.82 (t,  $J = 7.2$  Hz, 1H), 6.69 (d,  $J = 2.4$  Hz, 1H), 6.84 (m, 1H), 7.07 (m, 1H), 7.21–7.32 (m, 5H), 7.62 (d,  $J = 8.0$  Hz, 2H), 8.00 (d,  $J = 7.6$  Hz, 2H). **<sup>13</sup>C NMR** (100.5 MHz,  $\text{CDCl}_3$ )  $\delta$  34.0, 56.6, 123.0 (q,  $J_{\text{C-F}} = 271.4$  Hz), 123.8, 125.6 (q,  $J_{\text{C-F}} = 3.9$  Hz), 125.8, 126.7, 127.7, 128.2, 129.0, 129.2, 134.1 (q,  $J_{\text{C-F}} = 32.6$  Hz) 137.9, 139.2, 141.6, 197.9. **<sup>19</sup>F NMR** (376.5 MHz,  $\text{CDCl}_3$ )  $\delta$  -63.2. **HRMS–DART** ( $m/z$ ):  $[\text{M}+\text{NH}_4]^+$  calcd for  $\text{C}_{20}\text{H}_{19}\text{F}_3\text{NO}_2\text{S}$ , 394.1083; found, 394.1080.

### 2-Phenyl-3-(thiophen-2-yl)-1-[4-(trifluoromethyl)phenyl]propan-1-one (6gag)

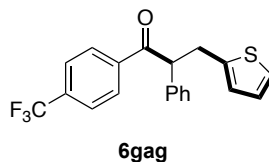

The product **6gag** was purified by flash chromatography on silica gel (Biotage Selekt, 100:0–90:10, hexane/EtOAc) (Fig. 2, 28.0 mg, 0.08 mmol, 39% isolated yield). Yellow oil. **IR** (neat) 694, 1065, 1111, 1124, 1166, 1320, 1685  $\text{cm}^{-1}$ . **<sup>1</sup>H NMR** (400 MHz,  $\text{CDCl}_3$ )  $\delta$  3.28 (dd,  $J = 14.4$ , 7.2 Hz, 1H), 3.80 (dd,  $J = 14.4$ , 7.2 Hz, 1H), 4.82 (t,  $J = 7.2$  Hz, 1H), 6.69 (d,  $J = 2.4$  Hz, 1H), 6.84 (m, 1H), 7.07 (m, 1H), 7.21–7.32 (m, 5H), 7.62 (d,  $J = 8.4$  Hz, 2H), 8.00 (d,  $J = 8.4$  Hz, 2H). **<sup>13</sup>C NMR** (100.5 MHz,  $\text{CDCl}_3$ )  $\delta$  34.0, 56.6, 123.5 (q,  $J_{\text{C-F}} = 258.2$  Hz), 123.8, 125.6 (q,  $J_{\text{C-F}} = 3.8$  Hz), 125.8, 126.7, 127.7, 128.2, 129.0, 129.2, 134.1 (q,  $J_{\text{C-F}} = 32.2$  Hz), 137.9, 139.2, 141.6, 197.9. **<sup>19</sup>F NMR** (376.5 MHz,

CDCl<sub>3</sub>)  $\delta$  -63.2. **HRMS-DART** ( $m/z$ ): [M+NH<sub>4</sub>]<sup>+</sup> calcd for C<sub>20</sub>H<sub>19</sub>F<sub>3</sub>NOS, 378.1134; found, 378.1134.

### 1-(4-Methoxyphenyl)-2-phenyl-3-(thiophen-2-yl)propan-1-one (**6hag**)

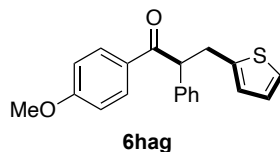

The product **6hag** was purified by flash chromatography on silica gel (Biotage Selekt, 100:0–80:20, hexane/EtOAc) (Fig. 2, 18.7 mg, 0.06 mmol, 29% isolated yield). Yellow oil. **IR** (neat) 697, 1027, 1165, 1236, 1256, 1596, 1668 cm<sup>-1</sup>. **<sup>1</sup>H NMR** (600 MHz, CDCl<sub>3</sub>)  $\delta$  3.26 (dd,  $J$  = 15.0, 7.2 Hz, 1H), 3.76–3.80 (m, 4H), 4.80 (t,  $J$  = 7.2 Hz, 1H), 6.68 (d,  $J$  = 3.0 Hz, 1H), 6.81–6.85 (m, 3H), 7.05 (d,  $J$  = 5.4 Hz, 1H), 7.19–7.21 (m, 1H), 7.25–7.29 (m, 4H), 7.93 (d,  $J$  = 8.4 Hz, 2H). **<sup>13</sup>C NMR** (150.9 MHz, CDCl<sub>3</sub>)  $\delta$  34.1, 55.4, 55.6, 113.7, 123.5, 125.6, 126.6, 127.2, 128.1, 128.9, 129.5, 131.0, 139.1, 142.3, 163.3, 197.2. **HRMS-DART** ( $m/z$ ): [M+H]<sup>+</sup> calcd for C<sub>20</sub>H<sub>19</sub>O<sub>2</sub>S, 323.1100; found, 323.1104.

### 1-[4-(Methylthio)phenyl]-2-phenyl-3-(thiophen-2-yl)propan-1-one (**6iag**)

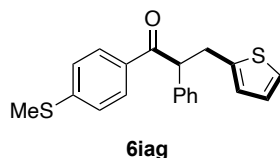

The product **6iag** was purified by flash chromatography on silica gel (Biotage Selekt, 100:0–90:10, hexane/EtOAc) (Fig. 2, 35.8 mg, 0.11 mmol, 53% isolated yield). Pale yellow solid. **M.p.** 81–86 °C. **IR** (neat) 699, 819, 1093, 1238, 1401, 1587, 1672 cm<sup>-1</sup>. **<sup>1</sup>H NMR** (400 MHz, CDCl<sub>3</sub>)  $\delta$  2.45 (s, 3H), 3.26 (dd,  $J$  = 14.8, 6.8 Hz, 1H), 3.78 (dd,  $J$  = 14.8, 6.8 Hz, 1H), 4.80 (t,  $J$  = 6.8 Hz, 1H), 6.68 (d,  $J$  = 2.4 Hz, 1H), 6.82 (m, 1H), 7.05 (m, 1H), 7.16 (d,  $J$  = 8.4 Hz, 2H), 7.21 (m, 1H), 7.25–7.28 (m, 4H), 7.85 (d,  $J$  = 8.0 Hz, 2H). **<sup>13</sup>C NMR** (150.9 MHz, CDCl<sub>3</sub>)  $\delta$  14.6, 34.1, 55.8, 123.6, 124.9, 125.6, 126.6, 127.3, 128.2, 129.0, 129.1, 132.8, 138.8, 142.1, 145.9, 197.7. **HRMS-DART** ( $m/z$ ): [M+H]<sup>+</sup> calcd for C<sub>20</sub>H<sub>19</sub>OS<sub>2</sub>, 339.0872; found, 339.0873.

### 2-Phenyl-1,3-di(thiophen-2-yl)propan-1-one (**6jag**)

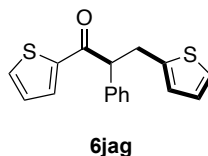

The product **6jag** was purified by flash chromatography on silica gel (Biotage Selekt, 100:0–90:10, hexane/EtOAc) (Fig. 2, 31.6 mg, 0.11 mmol, 53% isolated yield). Pale yellow solid. **M.p.** 77–80 °C. **IR** (neat) 697, 1167, 1234, 1410, 1493, 1509, 1668 cm<sup>-1</sup>. **<sup>1</sup>H NMR** (400 MHz, CDCl<sub>3</sub>)  $\delta$  3.25 (dd,  $J$  = 14.8, 7.2 Hz, 1H), 3.77 (dd,  $J$  = 14.8, 7.2 Hz, 1H), 4.63 (t,  $J$  = 7.2 Hz, 1H), 6.68 (m, 1H), 6.82 (m, 1H), 7.05 (m, 1H), 7.18–7.25 (m, 2H), 7.28 (t,  $J$  = 4.4 Hz, 4H), 7.50 (m, 1H), 8.00 (m, 1H). **<sup>13</sup>C NMR**

(100.5 MHz, CDCl<sub>3</sub>)  $\delta$ 33.8, 57.8, 123.6, 125.7, 126.1, 126.6, 127.4, 127.4, 128.1, 129.0, 132.8, 138.7, 141.6, 141.9, 193.0. **HRMS–DART** ( $m/z$ ): [M+H]<sup>+</sup> calcd for C<sub>17</sub>H<sub>15</sub>OS<sub>2</sub>, 299.0559; found, 299.0557.

### 1-(Furan-2-yl)-2-phenyl-3-(thiophen-2-yl)propan-1-one (6kag)

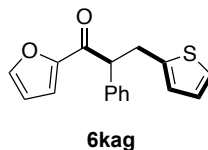

The product **6kag** was purified by flash chromatography on silica gel (Biotage Selekt, 100:0–90:10, hexane/EtOAc) (Fig. 2, 36.1 mg, 0.13 mmol, 64% isolated yield). Orange solid. **M.p.** 75–79 °C. **IR** (neat) 698, 762, 881, 1271, 1464, 1566, 1670 cm<sup>-1</sup>. **<sup>1</sup>H NMR** (600 MHz, CDCl<sub>3</sub>)  $\delta$ 3.28 (dd,  $J$  = 14.4, 7.2 Hz, 1H), 3.78 (dd,  $J$  = 14.4, 7.2 Hz, 1H), 4.67 (t,  $J$  = 7.2 Hz, 1H), 6.44 (dd,  $J$  = 3.6, 1.8 Hz, 1H), 6.71 (d,  $J$  = 3.6 Hz, 1H), 6.83 (m, 1H), 7.06 (d,  $J$  = 5.4 Hz, 1H), 7.15 (d,  $J$  = 3.6 Hz, 1H), 7.24 (m, 1H), 7.29 (t,  $J$  = 7.2 Hz, 2H), 7.34 (d,  $J$  = 7.8 Hz, 2H), 7.51 (d,  $J$  = 0.6 Hz, 1H), **<sup>13</sup>C NMR** (150.9 MHz, CDCl<sub>3</sub>)  $\delta$ 33.1, 56.0, 112.3, 118.1, 123.6, 125.7, 126.7, 127.4, 128.3, 128.8, 138.2, 141.8, 146.6, 152.3, 187.8. **HRMS–DART** ( $m/z$ ): [M+H]<sup>+</sup> calcd for C<sub>17</sub>H<sub>15</sub>O<sub>2</sub>S, 283.0787; found, 283.0791.

### 1-(Benzofuran-2-yl)-2-phenyl-3-(thiophen-2-yl)propan-1-one (6lag)

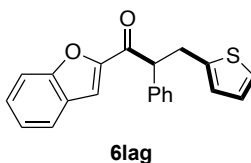

The product **6lag** was purified by flash chromatography on silica gel (Biotage Selekt, 100:0–90:10, hexane/EtOAc) (Fig. 2, 39.9 mg, 0.12 mmol, 60% isolated yield). Yellow solid. **M.p.** 82–88 °C. **IR** (neat) 698, 752, 1139, 1158, 1282, 1552, 1675 cm<sup>-1</sup>. **<sup>1</sup>H NMR** (400 MHz, CDCl<sub>3</sub>)  $\delta$ 3.32 (dd,  $J$  = 14.8, 7.2 Hz, 1H), 3.84 (dd,  $J$  = 14.8, 7.2 Hz, 1H), 4.81 (t,  $J$  = 7.2 Hz, 1H), 6.74 (d,  $J$  = 3.2 Hz, 1H), 6.83 (dd,  $J$  = 5.2, 3.2 Hz, 1H), 7.05 (d,  $J$  = 5.2 Hz, 1H), 7.21–7.26 (m, 2H), 7.30 (t,  $J$  = 7.6 Hz, 2H), 7.38–7.44 (m, 3H), 7.47 (s, 1H), 7.52 (d,  $J$  = 8.4 Hz, 1H), 7.62 (d,  $J$  = 7.6 Hz, 1H). **<sup>13</sup>C NMR** (150.9 MHz, CDCl<sub>3</sub>)  $\delta$ 33.1, 56.5, 112.4, 113.9, 113.9, 123.2, 123.7, 123.7, 123.8, 125.8, 126.7, 126.9, 127.6, 128.3, 128.3, 128.9, 138.0, 141.6, 152.0, 155.6, 189.6. **HRMS–DART** ( $m/z$ ): [M+H]<sup>+</sup> calcd for C<sub>21</sub>H<sub>17</sub>O<sub>2</sub>S, 330.0944; found, 330.0943.

### 2-Phenyl-1-(pyridin-2-yl)-3-(thiophen-2-yl)propan-1-one (6mag)

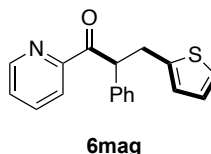

The product **6mag** was purified by flash chromatography on silica gel (Biotage Selekt, 100:0–90:10, hexane/EtOAc) (Fig. 2, 27.0 mg, 0.09 mmol, 46% isolated yield). Colorless oil. **IR** (neat) 618, 698, 754, 767, 995, 1333, 1434, 1693 cm<sup>-1</sup>. **<sup>1</sup>H NMR** (600 MHz, CDCl<sub>3</sub>)  $\delta$ 3.35 (dd,  $J$  = 15.0, 7.2 Hz, 1H), 3.79 (dd,  $J$  = 15.0, 7.2 Hz, 1H), 5.75 (t,  $J$  = 7.2 Hz, 1H), 6.74 (d,  $J$  = 3.6 Hz, 1H), 6.81 (dd,  $J$  =

5.4, 3.6 Hz, 1H), 7.03 (d,  $J = 5.4$  Hz, 1H), 7.17 (t,  $J = 7.2$  Hz, 1H), 7.24–7.26 (m, 2H), 7.37 (m, 1H), 7.41 (d,  $J = 7.8$  Hz, 2H), 7.74 (m, 1H), 7.79 (d,  $J = 7.8$  Hz, 1H), 8.04 (d,  $J = 4.8$  Hz, 1H).  $^{13}\text{C}$  NMR (150.9 MHz,  $\text{CDCl}_3$ )  $\delta$  33.0, 52.7, 122.7, 123.4, 125.4, 126.5, 127.0, 127.0, 128.5, 128.9, 136.7, 138.3, 142.3, 148.9, 152.7, 200.2. **HRMS–DART** ( $m/z$ ):  $[\text{M}+\text{H}]^+$  calcd for  $\text{C}_{18}\text{H}_{16}\text{NOS}$ , 294.0947; found, 294.0942.

### 2-[4-(Methoxyphenyl)-1-phenyl-3-(thiophen-2-yl)propan-1-one (6abg)

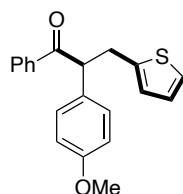

**6abg**

The product **6abg** was purified by flash chromatography on silica gel (Biotage Selekt, 100:0–80:20, hexane/EtOAc) (Fig. 2, 0.1 mmol scale, 8.7 mg, 0.03 mmol, 27% isolated yield). Pale yellow oil. **IR** (neat) 690, 1033, 1178, 1251, 1447, 1510, 1608, 1678  $\text{cm}^{-1}$ .  $^1\text{H}$  NMR (400 MHz,  $\text{CDCl}_3$ )  $\delta$  3.25 (dd,  $J = 14.4, 7.2$  Hz, 1H), 3.72–3.78 (m, 4H), 4.80 (t,  $J = 7.2$  Hz, 1H), 6.68 (d,  $J = 3.6$  Hz, 1H), 6.79–6.84 (m, 3H), 7.06 (m, 1H), 7.18–7.21 (m, 2H), 7.36 (t,  $J = 7.6$  Hz, 2H), 7.47 (m, 1H), 7.92 (d,  $J = 6.8$  Hz, 2H).  $^{13}\text{C}$  NMR (100.5 MHz,  $\text{CDCl}_3$ )  $\delta$  34.1, 55.2 ( $\times 2\text{C}$ ), 114.4, 123.6, 125.6, 126.6, 128.5, 128.7, 129.3, 131.4, 132.9, 136.6, 142.2, 158.8, 199.0. **HRMS–DART** ( $m/z$ ):  $[\text{M}+\text{NH}_4]^+$  calcd for  $\text{C}_{20}\text{H}_{22}\text{NO}_2\text{S}$ , 340.1366; found, 340.1369.

### 2-[4-(Benzyloxy)phenyl]-1-phenyl-3-(thiophen-2-yl)propan-1-one (6acg)

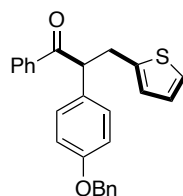

**6acg**

The product **6acg** was purified by flash chromatography on silica gel (Biotage Selekt, 100:0–90:10, hexane/EtOAc) (Fig. 2, 0.1 mmol scale, 18.3 mg, 0.05 mmol, 46% isolated yield). Pale yellow solid. **M.p.** 77–83  $^{\circ}\text{C}$ . **IR** (neat) 692, 738, 828, 1025, 1176, 1243, 1508, 1677  $\text{cm}^{-1}$ .  $^1\text{H}$  NMR (600 MHz,  $\text{CDCl}_3$ )  $\delta$  3.25 (dd,  $J = 15.0, 7.2$  Hz, 1H), 3.75 (dd,  $J = 15.0, 7.2$  Hz, 1H), 4.80 (t,  $J = 7.2$  Hz, 1H), 4.99 (s, 2H), 6.68 (s, 1H), 6.82 (t,  $J = 4.2$  Hz, 1H), 6.89 (d,  $J = 8.4$  Hz, 2H), 7.05 (d,  $J = 4.8$  Hz, 1H), 7.20 (d,  $J = 8.0$  Hz, 2H), 7.28 (m, 1H), 7.35–7.40 (m, 6H), 7.46 (t,  $J = 7.6$  Hz, 1H), 7.92 (d,  $J = 7.8$  Hz, 2H).  $^{13}\text{C}$  NMR (150.9 MHz,  $\text{CDCl}_3$ )  $\delta$  34.1, 55.1, 70.0, 115.3, 123.6, 125.6, 126.6, 127.5, 128.0, 128.5, 128.6, 128.7, 129.3, 130.9, 132.9, 136.6, 136.8, 142.2, 158.1, 199.0. **HRMS–DART** ( $m/z$ ):  $[\text{M}+\text{NH}_4]^+$  calcd for  $\text{C}_{26}\text{H}_{26}\text{NO}_2\text{S}$ , 416.1679; found, 416.1672.

### 2-(4-Chlorophenyl)-1-phenyl-3-(thiophen-2-yl)propan-1-one (6adg)

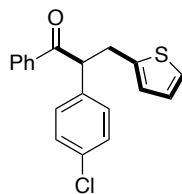

**6adg**

The product **6adg** was purified by flash chromatography on silica gel (Biotage Selekt, 100:0–90:10, hexane/EtOAc) (Fig. 2, 0.1 mmol scale, 14.7 mg, 0.05 mmol, 45% isolated yield). Pale yellow solid. **M.p.** 79–83 °C. **IR** (neat) 689, 719, 816, 1014, 1092, 1447, 1489, 1679  $\text{cm}^{-1}$ . **<sup>1</sup>H NMR** (600 MHz,  $\text{CDCl}_3$ )  $\delta$  3.27 (dd,  $J = 15.0, 7.2$  Hz, 1H), 3.74 (dd,  $J = 15.0, 7.2$  Hz, 1H), 4.82 (t,  $J = 7.2$  Hz, 1H), 6.67 (d,  $J = 3.6$  Hz, 1H), 6.83 (dd,  $J = 5.4, 3.6$  Hz, 1H), 7.07 (dd,  $J = 5.4, 1.2$  Hz, 1H), 7.20–7.26 (m, 4H), 7.38 (t,  $J = 7.8$  Hz, 2H), 7.49 (t,  $J = 7.2$  Hz, 1H), 7.90 (d,  $J = 7.2$  Hz, 2H). **<sup>13</sup>C NMR** (150.9 MHz,  $\text{CDCl}_3$ )  $\delta$  34.0, 55.3, 123.8, 125.8, 126.7, 128.6, 128.7, 129.1, 129.6, 133.2, 133.3, 136.3, 137.0, 141.5, 198.5. **HRMS–DART** ( $m/z$ ):  $[\text{M} + \text{H}]^+$  calcd for  $\text{C}_{19}\text{H}_{16}\text{ClOS}$ , 327.0605; found, 327.0602.

### 2-(6-Methoxynaphthalen-2-yl)-1-phenyl-3-(thiophen-2-yl)propan-1-one (6aeg)

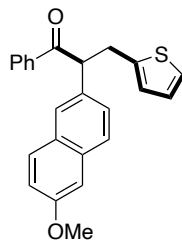

**6aeg**

The product **6aeg** was purified by flash chromatography on silica gel (Biotage Selekt, 100:0–80:20, hexane/EtOAc) (Fig. 2, 0.1 mmol scale, 14.9 mg, 0.04 mmol, 40% isolated yield). Yellow oil. **IR** (neat) 687, 751, 850, 1030, 1204, 1222, 1264, 1603, 1676  $\text{cm}^{-1}$ . **<sup>1</sup>H NMR** (600 MHz,  $\text{CDCl}_3$ )  $\delta$  3.36 (dd,  $J = 15.0, 7.2$  Hz, 1H), 3.84–3.89 (m, 4H), 4.98 (t,  $J = 7.2$  Hz, 1H), 6.70 (s, 1H), 6.81–6.82 (m, 1H), 7.05–7.07 (m, 2H), 7.11 (m, 1H), 7.33–7.39 (m, 3H), 7.44 (m, 1H), 7.65–7.68 (m, 3H), 7.96 (d,  $J = 6.6$  Hz, 2H). **<sup>13</sup>C NMR** (150.9 MHz,  $\text{CDCl}_3$ )  $\delta$  34.2, 55.3, 56.0, 105.5, 119.1, 123.6, 125.7, 126.6, 126.7, 127.0, 127.6, 128.5, 128.7, 129.0, 129.3, 132.9, 133.7, 133.8, 136.6, 142.1, 157.8, 198.9. **HRMS–DART** ( $m/z$ ):  $[\text{M} + \text{H}]^+$  calcd for  $\text{C}_{24}\text{H}_{21}\text{O}_2\text{S}$ , 373.1257; found, 373.1259.

## 7. Characterization Data for Amide Substrates

### (2-Iodothiophen-3-yl)(pyrrolidin-1-yl)methanone (7a)

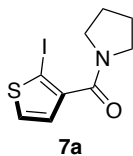

Pale Yellow Solid. **M.p.** 81–82 °C. **IR** (neat) 711, 838, 1436, 1522, 1613, 2874, 2948, 2968, 3070, 3478  $\text{cm}^{-1}$ .  **$^1\text{H}$  NMR** (400 MHz,  $\text{CDCl}_3$ )  $\delta$  1.88–2.01 (m, 4H), 3.30 (t,  $J = 6.4$  Hz, 2H), 3.65 (t,  $J = 6.8$  Hz, 2H), 6.90 (d,  $J = 5.6$  Hz, 1H), 7.43 (d,  $J = 5.6$  Hz, 1H).  **$^{13}\text{C}$  NMR** (100.6 MHz,  $\text{CDCl}_3$ )  $\delta$  24.5, 26.0, 45.8, 48.4, 73.5, 126.9, 132.1, 144.3, 165.2. **HRMS–DART** ( $m/z$ ):  $[\text{M}+\text{H}]^+$  calcd for  $\text{C}_9\text{H}_{11}\text{INOS}$ ; 307.9601, found 307.9601.

### (2-Iodothiophen-3-yl)(piperidin-1-yl)methanone (7b)

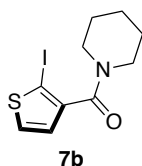

Pale Yellow Solid. **M.p.** 47–50 °C. **IR** (neat) 720, 852, 1266, 1465, 1522, 1616, 2853, 2934, 2992, 3070  $\text{cm}^{-1}$ .  **$^1\text{H}$  NMR** (400 MHz,  $\text{CDCl}_3$ )  $\delta$  1.57 (m, 2H), 1.68 (m, 4H), 3.24–3.27 (m, 2H), 3.73 (m, 2H), 6.84 (d,  $J = 5.6$  Hz, 1H), 7.43 (d,  $J = 5.6$  Hz, 1H).  **$^{13}\text{C}$  NMR** (100.6 MHz,  $\text{CDCl}_3$ )  $\delta$  24.5, 25.6, 26.7, 42.9, 48.2, 73.3, 127.1, 132.1, 143.3, 165.4. **HRMS–DART** ( $m/z$ ):  $[\text{M}+\text{H}]^+$  calcd for  $\text{C}_{10}\text{H}_{13}\text{INOS}$ ; 321.9757, found 321.9751.

### Azepan-1-yl(2-iodothiophen-3-yl)methanone (7c)

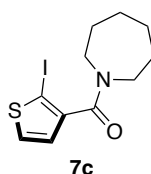

Pale Yellow Solid. **M.p.** 66–69 °C. **IR** (neat) 722, 1152, 1276, 1300, 1428, 1523, 1617, 2852, 2924, 3069  $\text{cm}^{-1}$ .  **$^1\text{H}$  NMR** (400 MHz,  $\text{CDCl}_3$ )  $\delta$  1.58–1.68 (m, 6H), 1.82–1.88 (m, 2H), 3.29–3.32 (m, 2H), 3.69 (t,  $J = 6.0$  Hz, 2H), 6.84 (d,  $J = 5.6$  Hz, 1H), 7.43 (d,  $J = 5.6$  Hz, 1H).  **$^{13}\text{C}$  NMR** (100.6 MHz,  $\text{CDCl}_3$ )  $\delta$  26.6, 27.3, 27.8, 29.2, 45.8, 49.2, 73.2, 126.9, 132.1, 143.9, 166.9. **HRMS–DART** ( $m/z$ ):  $[\text{M}+\text{H}]^+$  calcd for  $\text{C}_{11}\text{H}_{15}\text{INOS}$ ; 335.9914, found 339.9911.

### *tert*-Butyl 4-(2-Iodothiophene-3-carbonyl)piperazine-1-carboxylate (7d)

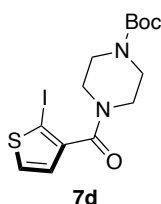

Yellow Solid. **M.p.** 153–157 °C. **IR** (neat) 752, 1164, 1259, 1418, 1630, 1688, 2861, 2927, 2975, 3097  $\text{cm}^{-1}$ .  **$^1\text{H}$  NMR** (400 MHz,  $\text{CDCl}_3$ )  $\delta$  1.47 (s, 9H), 3.20 (m, 2H), 3.45 (m, 2H), 3.54 (m, 2H), 3.76 (m, 2H), 6.86 (d,  $J = 5.6$  Hz, 1H), 7.47 (d,  $J = 5.6$  Hz, 1H).  **$^{13}\text{C}$  NMR** (100.6 MHz,  $\text{CDCl}_3$ )  $\delta$  28.3, 41.8, 43.7, 46.9, 73.9, 80.4, 127.1, 132.6, 142.3, 154.4, 165.7. **HRMS–DART** ( $m/z$ ):  $[\text{M}+\text{H}]^+$  calcd for  $\text{C}_{14}\text{H}_{20}\text{IN}_2\text{O}_3\text{S}$ ; 423.0234, found 423.0230.

### Methyl (2-Iodothiophene-3-carbonyl)prolinate (7e)

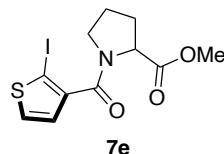

Pale Yellow Oil. **IR** (neat) 719, 1171, 1201, 1428, 1623, 1738, 2878, 2950, 3101, 3471  $\text{cm}^{-1}$ . Peaks for two rotamers (74:26) were given:  **$^1\text{H}$  NMR** (400 MHz,  $\text{CDCl}_3$ )  $\delta$  1.88–2.14 (m, 3H), 2.32 (m, 1H), 3.38–3.57 (m,  $0.74 \times 2\text{H}$ ), 3.58 (s,  $0.26 \times 3\text{H}$ ), 3.77–3.82 (m,  $0.74 \times 1\text{H} + 2\text{H}$ ), 4.29 (m,  $0.26 \times 1\text{H}$ ), 4.68 (m,  $0.74 \times 1\text{H}$ ), 6.81 (d,  $J = 5.6$  Hz,  $0.26 \times 1\text{H}$ ), 6.95 (d,  $J = 5.6$  Hz,  $0.74 \times 1\text{H}$ ), 7.40 (d,  $J = 5.6$  Hz,  $0.26 \times 1\text{H}$ ), 7.44 (d,  $J = 5.6$  Hz,  $0.74 \times 1\text{H}$ ). Peaks for the minor rotamer were enclosed in parenthesis:  **$^{13}\text{C}$  NMR** (100.6 MHz,  $\text{CDCl}_3$ )  $\delta$  (22.9), 24.9, 29.4, (31.3), (46.3), 48.7, 52.2, (52.4), 58.7, (60.7), (73.9), 74.1, 127.0, (127.2), 132.1, (132.1), 142.9, (143.5), 165.1, (165.6), (172.2), 172.2. **HRMS–DART** ( $m/z$ ):  $[\text{M}+\text{H}]^+$  calcd for  $\text{C}_{11}\text{H}_{13}\text{INO}_3\text{S}$ ; 365.9655, found 365.9656.

### *N,N*-Diethyl-2-iodothiophene-3-carboxamide (7f)

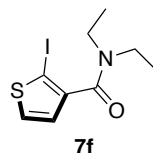

Yellow Solid. **M.p.** 70–73 °C. **IR** (neat) 843, 1278, 1433, 1456, 1472, 1620, 2871, 2932, 2972, 3070  $\text{cm}^{-1}$ .  **$^1\text{H}$  NMR** (400 MHz,  $\text{CDCl}_3$ )  $\delta$  1.09 (t,  $J = 7.2$  Hz, 3H), 1.28 (t,  $J = 7.2$  Hz, 3H), 3.21 (q,  $J = 7.2$  Hz, 2H), 3.57 (q,  $J = 7.2$  Hz, 2H), 6.85 (d,  $J = 5.2$  Hz, 1H), 7.44 (d,  $J = 5.2$  Hz, 1H).  **$^{13}\text{C}$  NMR** (100.6 MHz,  $\text{CDCl}_3$ )  $\delta$  12.8, 14.3, 39.2, 43.0, 73.2, 126.8, 132.1, 143.5, 166.4. **HRMS–DART** ( $m/z$ ):  $[\text{M}+\text{H}]^+$  calcd for  $\text{C}_9\text{H}_{13}\text{INOS}$ ; 309.9757, found 309.9759.

### *N*-Benzyl-*N*-ethyl-2-iodothiophene-3-carboxamide (7g)

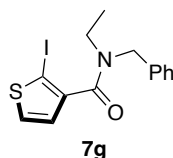

Pale Yellow Solid. **M.p.** 76–78 °C. **IR** (neat) 702, 727, 1113, 1429, 1451, 1626, 2933, 2973, 3028, 3065  $\text{cm}^{-1}$ . Peaks for two rotamers. (51:49) were given:  **$^1\text{H}$  NMR** (400 MHz,  $\text{CDCl}_3$ )  $\delta$  1.05 (t,  $J = 7.2$  Hz,  $0.51 \times 3\text{H}$ ), 1.24 (t,  $J = 7.2$  Hz,  $0.49 \times 3\text{H}$ ), 3.14 (q,  $J = 7.2$  Hz,  $0.51 \times 2\text{H}$ ), 3.52 (q,  $J = 7.2$  Hz,  $0.49 \times 2\text{H}$ ), 4.33 (s,  $0.49 \times 2\text{H}$ ), 4.79 (s,  $0.51 \times 2\text{H}$ ), 6.86 (d,  $J = 5.6$  Hz,  $0.49 \times 1\text{H}$ ), 6.90 (d,  $J = 5.6$  Hz,  $0.51 \times 1\text{H}$ ), 7.15 (d,  $J = 7.2$  Hz, 1H), 7.28–7.46 (m, 5H). Peaks for the minor rotamer were



enclosed in parenthesis:  $^{13}\text{C}$  NMR (100.6 MHz,  $\text{CDCl}_3$ )  $\delta$ (12.3), 13.7, 39.4, (42.3), 46.8, (51.7), 73.4, (74.0), (126.9), 127.0, (127.1), 127.4, (127.6), 128.3, 128.5, (128.7), 132.3 (132.3), (136.5), 136.9, (142.8), 143.1, (166.9), 167.1. **HRMS–DART** ( $m/z$ ):  $[\text{M}+\text{H}]^+$  calcd for  $\text{C}_{14}\text{H}_{15}\text{INOS}$ ; 371.9914, found 371.9914.

**{4-(2-Chlorodibenzo[*b,f*][1,4]oxazepin-11-yl)piperazin-1-yl}(2-iodothiophen-3-yl)methanone (7h)**

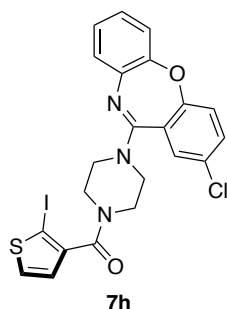

White Solid. **M.p.** 138–140 °C. **IR** (neat) 750, 1013, 1239, 1469, 1587, 1629, 2854, 2915, 3001, 3969  $\text{cm}^{-1}$ .  $^1\text{H}$  NMR (400 MHz,  $\text{CDCl}_3$ )  $\delta$  3.47–3.92 (m, 8H), 6.88 (d,  $J = 5.6$  Hz, 1H), 7.02 (m, 1H), 7.08–7.15 (m, 3H), 7.20 (d,  $J = 8.8$  Hz, 1H), 7.33 (m, 1H), 7.41 (dd,  $J = 8.8, 2.4$  Hz, 1H), 7.47 (d,  $J = 5.6$  Hz, 1H).  $^{13}\text{C}$  NMR (100.6 MHz,  $\text{CDCl}_3$ )  $\delta$  41.6, 46.7, 47.4, 48.0, 74.0, 120.1, 122.8, 124.7, 125.0, 125.8, 127.1, 127.2, 128.7, 130.4, 132.6, 132.8, 139.6, 142.3, 151.6, 158.6, 159.3, 165.7. **HRMS–DART** ( $m/z$ ):  $[\text{M}+\text{H}]^+$  calcd for  $\text{C}_{22}\text{H}_{18}\text{ClIN}_3\text{O}_2\text{S}$ ; 549.9847, found 549.9849.

**{(3*S*,4*R*)-3-[(Benzo[*d*][1,3]dioxol-5-yloxy)methyl]-4-(4-fluorophenyl)piperidin-1-yl}(2-iodothiophen-3-yl)methanone (7i)**

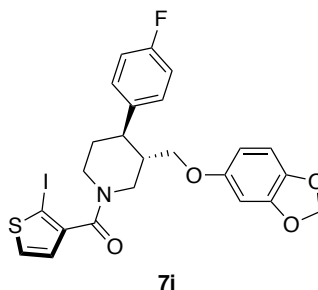

White Solid. **M.p.** 162–163 °C. **IR** (neat) 746, 1037, 1180, 1442, 1486, 1502, 1569, 1623, 2917, 3004  $\text{cm}^{-1}$ . Peaks for two rotamers were given:  $^1\text{H}$  NMR (400 MHz,  $\text{CDCl}_3$ )  $\delta$  1.81–1.98 (m, 2H), 2.15 (m, 1H), 2.75–3.00 (m, 2H), 3.16 (m, 1H), 3.40 (m, 0.50  $\times$  1H), 3.53 (m, 1H), 3.70 (m, 1H), 3.82 (d,  $J = 12.8$  Hz, 0.50  $\times$  1H), 4.90 (d,  $J = 12.8$  Hz, 0.50  $\times$  1H), 5.04 (d,  $J = 12.8$  Hz, 0.50  $\times$  1H), 5.89 (s, 2H), 6.00 (d,  $J = 8.4$  Hz, 0.50  $\times$  1H), 6.18 (m, 1H), 6.39 (s, 0.50  $\times$  1H), 6.62 (dd,  $J = 16.0, 8.4$  Hz, 1H), 6.90 (m, 1H), 6.99 (m, 2H), 7.13–7.17 (m, 2H), 7.48 (d,  $J = 5.2$  Hz, 1H). Peaks for two rotamers were given:  $^{13}\text{C}$  NMR (100.6 MHz,  $\text{CDCl}_3$ )  $\delta$  33.5, 34.6, 41.9, 42.5, 42.8, 43.6, 44.0, 45.1, 47.6, 50.4, 68.1, 68.4, 73.7, 73.8, 97.8, 97.9, 101.0, 105.3, 105.5, 107.8, 115.5 (d,  $J_{\text{C-F}} = 21.0$  Hz), 115.6 (d,  $J_{\text{C-F}} = 21.1$  Hz), 126.9, 127.0, 128.6 (d,  $J_{\text{C-F}} = 8.3$  Hz), 128.7 (d,  $J_{\text{C-F}} = 9.6$  Hz), 132.3, 132.3, 138.4, 141.7, 142.7, 142.8, 148.1, 153.5, 154.1, 161.6 (d,  $J_{\text{C-F}} = 245.3$  Hz), 165.5 (only observed peaks).  $^{19}\text{F}$

**NMR** (376.5 MHz, CDCl<sub>3</sub>)  $\delta$  -115.8, -115.6. **HRMS-DART** ( $m/z$ ): [M+H]<sup>+</sup> calcd for C<sub>24</sub>H<sub>22</sub>FINO<sub>4</sub>S; 566.0293, found 566.0292.

### (3-Iodothiophen-2-yl)(pyrrolidin-1-yl)methanone (7a-A)

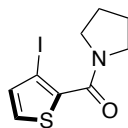

7a-A

Pale Yellow Oil. **IR** (neat) 737, 862, 1392, 1440, 1613, 2873, 2948, 2968, 3071, 3488 cm<sup>-1</sup>. **<sup>1</sup>H NMR** (400 MHz, CDCl<sub>3</sub>)  $\delta$  1.92–2.00 (m, 4H), 3.38–3.42 (m, 2H), 3.64–3.68 (m, 2H), 7.05 (m, 1H), 7.72 (m, 1H). **<sup>13</sup>C NMR** (100.6 MHz, CDCl<sub>3</sub>)  $\delta$  24.5, 26.0, 46.2, 48.9, 78.6, 127.6, 135.3, 137.7, 162.6. **HRMS-DART** ( $m/z$ ): [M+H]<sup>+</sup> calcd for C<sub>9</sub>H<sub>11</sub>INOS; 307.9601, found 307.9600.

### (2-Iodofuran-3-yl)(pyrrolidin-1-yl)methanone (7a-B)

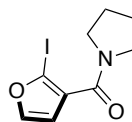

7a-B

Pale Yellow Oil. **IR** (neat) 736, 888, 1143, 1416, 1479, 1606, 2875, 2970, 3109, 3470 cm<sup>-1</sup>. **<sup>1</sup>H NMR** (400 MHz, CDCl<sub>3</sub>)  $\delta$  1.91–1.97 (m, 4H), 3.47 (t,  $J$  = 6.0 Hz, 2H), 3.61 (t,  $J$  = 6.0 Hz, 2H), 6.50 (m, 1H), 7.56 (m, 1H). **<sup>13</sup>C NMR** (100.6 MHz, CDCl<sub>3</sub>)  $\delta$  24.2, 26.1, 45.9, 48.5, 91.3, 111.5, 128.6, 147.6, 162.6. **HRMS-DART** ( $m/z$ ): [M+H]<sup>+</sup> calcd for C<sub>9</sub>H<sub>11</sub>INO<sub>2</sub>; 291.9829, found 291.9823.

### (2-Iodophenyl)(pyrrolidin-1-yl)methanone (7a-C)

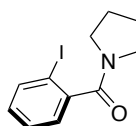

7a-C

The spectrum data of **7a-C** was consistent with the literature.<sup>9</sup>

## 8. Procedure for C(sp<sup>3</sup>)-H Acylation of Secondary Amides

The reaction to produce **8ma** in Fig. 4 is representative. Thiazolium salt **N1** (8.3 mg, 0.02 mmol) and amide **7a** (61.4 mg, 0.2 mmol) were placed in a Schlenk tube containing a magnetic stirring bar. The tube was sealed with a Teflon<sup>®</sup>-coated silicon rubber septum, and then evacuated and filled with nitrogen. Cs<sub>2</sub>CO<sub>3</sub> (71.7 mg, 0.22 mmol), degassed DMSO (400  $\mu$ L) and 2-pyridinecarboxaldehyde (**1m**) (42.8 mg, 0.4 mmol) were added to the vial. After 6 h stirring at 80 °C, the reaction mixture was treated with saturated NH<sub>4</sub>Cl aqueous solution (400  $\mu$ L), then extracted with diethyl ether (4 times) and dried over sodium sulfate. After filtration through a short plug of aluminum oxide (1 g) with diethyl ether as an eluent, the resulting solution was evaporated under reduced pressure. After the volatiles were removed under reduced pressure, flash column chromatography on silica gel (100:0–50:50, hexane/EtOAc) gave **8ma** (53.0 mg, 0.19 mmol) in 93% yield.

## 9. Characterization Data for $\alpha$ -Aminoketones

### 2-[(Thiophene-3-carbonyl)propyl]pyridine (**8ma**)

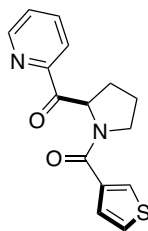

**8ma**

The product **8ma** was purified by flash chromatography on silica gel (100:0–50:50, hexane/EtOAc) (Fig. 4, 53.0 mg, 0.19 mmol, 93% isolated yield). Pale Yellow Oil. **IR** (neat) 740, 995, 1359, 1434, 1606, 1704, 2874, 2972, 3085, 3474  $\text{cm}^{-1}$ . Peaks for two rotamers (83:17) were given:  **$^1\text{H NMR}$**  (400 MHz,  $\text{CDCl}_3$ )  $\delta$  1.97–2.13 (m, 3H), 2.53 (m, 1H), 3.82–3.95 (m, 2H), 6.09 (m, 1H), 7.09–7.15 (m,  $0.17 \times 2\text{H}$ ), 7.30 (m,  $0.83 \times 1\text{H}$ ), 7.36 (m,  $0.17 \times 1\text{H}$ ), 7.42–7.49 (m,  $0.83 \times 1\text{H} + 1\text{H}$ ), 7.77–7.86 (m,  $0.83 \times 1\text{H} + 1\text{H}$ ), 7.94 (m,  $0.17 \times 1\text{H}$ ), 8.10 (d,  $J = 8.0$  Hz,  $0.83 \times 1\text{H}$ ), 8.60 (m,  $0.17 \times 1\text{H}$ ), 8.69 (d,  $J = 4.4$  Hz,  $0.83 \times 1\text{H}$ ). Peaks for the minor rotamer were enclosed in parenthesis:  **$^{13}\text{C NMR}$**  (100.6 MHz,  $\text{CDCl}_3$ )  $\delta$  (22.4), 25.7, 29.3, (31.4), (47.4), 49.9, 61.4, (63.1), (122.5), 122.6, 125.1, (125.5), (125.8), (127.1), 127.2, (127.5), 127.9, 128.0, 136.8, (137.0), 137.1, (137.8), 148.7, (148.9), (151.3), 152.3, 163.5, (165.5), 198.3, (198.8). **HRMS–DART** ( $m/z$ ):  $[\text{M}+\text{H}]^+$  calcd for  $\text{C}_{15}\text{H}_{15}\text{N}_2\text{O}_2\text{S}$ ; 287.0849, found 287.0849.

### 2-(Benzoylpropyl)pyridine (**8ma-C**)

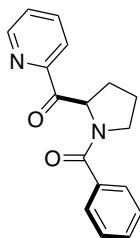

**8ma-C**

The product **8ma-C** was purified by flash chromatography on silica gel (Biotage Selekt, 100:0–50:50, hexane/EtOAc) (Fig. 4, 42.1 mg, 0.15 mmol, 75% isolated yield). Yellow oil. **IR** (neat) 658, 701, 719, 744, 996, 1413, 1576, 1671, 1705, 2978  $\text{cm}^{-1}$ . Peaks for two rotamers (82:18) were given:  **$^1\text{H NMR}$**  (400 MHz,  $\text{CDCl}_3$ )  $\delta$  1.95–2.05 (m, 3H), 2.42–2.59 (m, 1H), 3.62–3.93 (m, 2H), 5.86 (d,  $J = 7.6$  Hz,  $0.18 \times 1\text{H}$ ), 6.08 (t,  $J = 6.0$  Hz,  $0.82 \times 1\text{H}$ ), 7.15 (s,  $0.18 \times 3\text{H}$ ), 7.31 (s,  $0.18 \times 2\text{H}$ ), 7.39–7.41 (m,  $0.82 \times 3\text{H}$ ), 7.47–7.50 (m,  $0.82 \times 1\text{H}$ ), 7.61 (d,  $J = 7.2$  Hz,  $0.82 \times 2\text{H}$ ), 7.76 (t,  $J = 7.6$  Hz,  $0.18 \times 1\text{H}$ ), 7.83–7.89 (m, 1H), 8.11 (d,  $J = 8.0$  Hz,  $0.82 \times 1\text{H}$ ), 8.51 (d,  $J = 4.4$  Hz,  $0.18 \times 1\text{H}$ ), 8.71 (d,  $J = 4.4$  Hz,  $0.82 \times 1\text{H}$ ). Peaks for the minor rotamer were enclosed in parenthesis:  **$^{13}\text{C NMR}$**  (100.6 MHz,  $\text{CDCl}_3$ )  $\delta$  (22.5), 25.6, 29.6, (31.3), (47.1), 50.3, 61.1, (63.3), (122.3), 122.6, (126.5), 127.2, 127.3, (127.4), (128.0), 128.1, (129.2), 129.9, 136.4, (136.8), 137.3, (148.7), 148.7, (151.2), 152.3, 168.9, (170.4), 198.2, (198.9) (only observed peaks). **HRMS–DART** ( $m/z$ ):  $[\text{M}+\text{H}]^+$  calcd for  $\text{C}_{17}\text{H}_{17}\text{N}_2\text{O}_2$ ; 281.1285, found 281.1285.

**(2-Picolinoylpiperidin-1-yl)(thiophen-3-yl)methanone (8mb)**

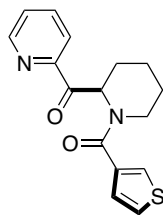

**8mb**

The product **8mb** was purified by flash chromatography on silica gel (100:0–60:40, hexane/EtOAc) (Fig. 4, 53.0 mg, 0.18 mmol, 88% isolated yield). Pale Yellow solid. **M.p.** 114–115 °C. **IR** (neat) 741, 981, 1219, 1423, 1617, 1700, 2858, 2938, 3100, 3477  $\text{cm}^{-1}$ . Peaks for two rotamers (74:26) were given: **<sup>1</sup>H NMR** (400 MHz,  $\text{CDCl}_3$ )  $\delta$  1.43–1.78 (m, 4H), 1.89 (m, 0.26  $\times$  1H), 2.06 (m, 0.74  $\times$  1H), 2.28 (m, 0.26  $\times$  1H), 2.41 (m, 0.74  $\times$  1H), 3.39 (m, 0.26  $\times$  1H), 3.71–3.88 (m, 0.74  $\times$  2H), 4.74 (m, 0.26  $\times$  1H), 6.00 (m, 0.26  $\times$  1H), 6.47 (m, 0.74  $\times$  1H), 7.07 (m, 0.26  $\times$  1H), 7.21 (m, 1H), 7.32 (m, 1H), 7.47 (m, 1H), 7.55 (m, 0.74  $\times$  1H), 7.85 (dt,  $J = 7.6, 1.6$  Hz, 1H), 8.04 (m, 1H), 8.53 (m, 0.26  $\times$  1H), 8.70 (m, 0.74  $\times$  1H). Peaks for the minor rotamer were enclosed in parenthesis: **<sup>13</sup>C NMR** (100.6 MHz,  $\text{CDCl}_3$ )  $\delta$  20.7, (24.9), 25.5, 26.6, (27.7), (40.0), 46.0, 55.3, (59.9), 122.4, (125.0), 125.5, (125.9), 126.4, 127.1 ( $\times$  2C), (127.3), 136.7, 136.8, (137.1), 148.8, (151.7), 152.3, 167.2, 199.7, (200.0) (only observed peaks). **HRMS–DART** ( $m/z$ ):  $[\text{M}+\text{H}]^+$  calcd for  $\text{C}_{16}\text{H}_{17}\text{N}_2\text{O}_2\text{S}$ ; 301.1005, found 301.1007.

**(2-Picolinoylazepan-1-yl)(thiophen-3-yl)methanone (8mc)**

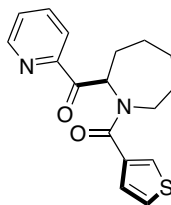

**8mc**

The product **8mc** was purified by flash chromatography on silica gel (100:0–50:50, hexane/EtOAc) (Fig. 4, 53.9 mg, 0.17 mmol, 86% isolated yield). Pale Yellow Solid. **M.p.** 103–105 °C. **IR** (neat) 742, 1218, 1275, 1425, 1523, 1614, 1702, 2854, 2927, 3105  $\text{cm}^{-1}$ . Peaks for two rotamers (76:24) were given: **<sup>1</sup>H NMR** (400 MHz,  $\text{CDCl}_3$ )  $\delta$  1.32–2.06 (m, 7H), 2.63 (m, 1H), 3.15 (m, 0.24  $\times$  1H), 3.57 (m, 0.76  $\times$  1H), 3.98 (m, 0.76  $\times$  1H), 4.56 (m, 0.24  $\times$  1H), 5.79 (m, 0.24  $\times$  1H), 6.07 (m, 0.76  $\times$  1H), 6.98 (m, 0.24  $\times$  1H), 7.16 (m, 0.24  $\times$  2H), 7.22 (m, 0.76  $\times$  1H), 7.29 (m, 0.76  $\times$  1H), 7.46 (m, 1H), 7.54 (m, 0.76  $\times$  1H), 7.84 (m, 1H), 8.04 (m, 1H), 8.52 (m, 0.24  $\times$  1H), 8.70 (m, 0.76  $\times$  1H). Peaks for the minor rotamer were enclosed in parenthesis: **<sup>13</sup>C NMR** (100.6 MHz,  $\text{CDCl}_3$ )  $\delta$  (25.8), 26.8, (28.5), 28.9, 29.3, (29.8), 31.5, (31.8), (44.0), 47.3, 61.1, (63.0), 122.4, (122.6), (124.6), 125.4, (125.9), 126.2, (126.5), 127.0, 127.2, (127.4), 136.8, 136.8, (137.0), (137.1), 148.7, (148.9), (151.5), 152.4, 167.2, (167.6), 199.9, (200.4). **HRMS–DART** ( $m/z$ ):  $[\text{M}+\text{H}]^+$  calcd for  $\text{C}_{17}\text{H}_{19}\text{N}_2\text{O}_2\text{S}$ ; 315.1162, found 315.1168.

### *tert*-Butyl 3-Picolinoyl-4-(thiophene-3-carbonyl)piperazine-1-carboxylate (**8md**)

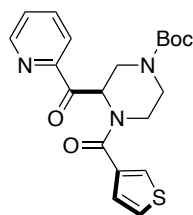

**8md**

The product **8md** was purified by flash chromatography on silica gel (100:0–50:50, hexane/EtOAc) (Fig. 4, 71.8 mg, 0.18 mmol, 89% isolated yield). White Solid. **M.p.** 54–59 °C. **IR** (neat) 747, 996, 1129, 1166, 1419, 1627, 1694, 2932, 2976, 3101  $\text{cm}^{-1}$ . Peaks for two rotamers (70:30) were given:  **$^1\text{H}$  NMR** (400 MHz,  $\text{CDCl}_3$ )  $\delta$  1.06 (s, 0.70  $\times$  9H), 1.25–1.47 (m, 0.30  $\times$  9H), 2.94–4.95 (m, 6H), 5.91 (m, 0.30  $\times$  1H), 6.44 (m, 0.70  $\times$  1H), 7.04 (m, 0.30  $\times$  1H), 7.19–7.27 (m, 1H), 7.34 (m, 1H), 7.51 (m, 1H), 7.61 (m, 0.70  $\times$  1H), 7.88 (m, 1H), 8.06 (m, 1H), 8.56 (m, 0.30  $\times$  1H), 8.72 (m, 0.70  $\times$  1H). Peaks for two rotamers were given:  **$^{13}\text{C}$  NMR** (100.6 MHz,  $\text{CDCl}_3$ )  $\delta$  27.6, 28.0, 28.3, 39.4, 42.7, 43.2, 44.0, 45.0, 45.8, 46.4, 55.9, 60.6, 79.9, 80.2, 122.3, 122.5, 125.8, 125.9, 126.1, 126.3, 126.4, 126.6, 126.9, 127.0, 127.4, 127.6, 135.9, 136.9, 137.2, 148.8, 151.4, 151.8, 153.7, 154.4, 167.1, 196.8, 197.2 (only observed peaks). **HRMS–DART** ( $m/z$ ):  $[\text{M}+\text{H}]^+$  calcd for  $\text{C}_{20}\text{H}_{24}\text{N}_3\text{O}_4\text{S}$ ; 402.1482, found 402.1484.

### Methyl 5-Picolinoyl-1-(thiophene-3-carbonyl)pyrrolidine-2-carboxylate (**8me**)

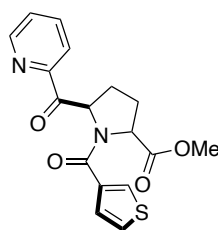

**8me**

The product **8me** was purified by flash chromatography on silica gel (100:0–50:50, hexane/EtOAc) (Fig. 4, 23.4 mg, 0.068 mmol, 34% isolated yield). The diastereomeric ratio (>20:1) was determined by  $^1\text{H}$ -NMR analysis. Pale Yellow Oil. **IR** (neat) 743, 1200, 1349, 1428, 1523, 1627, 1705, 1741, 2953, 3105  $\text{cm}^{-1}$ . Peaks for two rotamers (54:46) were given:  **$^1\text{H}$  NMR** (400 MHz,  $\text{CDCl}_3$ )  $\delta$  2.03–2.28 (m, 0.46  $\times$  1H + 2H), 2.49 (m, 1H), 2.67 (m, 0.54  $\times$  1H), 3.65 (s, 0.46  $\times$  3H), 3.80 (s, 0.54  $\times$  3H), 4.80 (d,  $J = 7.6$  Hz, 0.46  $\times$  1H), 4.97 (d,  $J = 8.4$  Hz, 0.54  $\times$  1H), 6.31 (d,  $J = 8.4$  Hz, 1H), 7.09 (m, 0.54  $\times$  1H), 7.15 (m, 0.54  $\times$  1H), 7.25 (m, 0.46  $\times$  1H), 7.30 (m, 0.46  $\times$  1H), 7.48–7.51 (m, 0.54  $\times$  1H + 1H), 7.56 (m, 0.46  $\times$  1H), 7.79–7.93 (m, 0.54  $\times$  1H + 1H), 8.11 (d,  $J = 8.0$  Hz, 0.46  $\times$  1H), 8.63 (d,  $J = 4.4$  Hz, 0.54  $\times$  1H), 8.71 (d,  $J = 4.8$  Hz, 0.46  $\times$  1H). Peaks for two rotamers were given:  **$^{13}\text{C}$  NMR** (100.6 MHz,  $\text{CDCl}_3$ )  $\delta$  26.9, 27.1, 30.0, 30.3, 52.3, 52.5, 60.5, 61.6, 61.8, 63.1, 122.6, 122.7, 125.5, 125.8, 126.5, 126.6, 127.2, 127.3, 127.4, 127.7, 136.7, 136.9, 136.9, 137.1, 148.9, 149.0, 151.1, 152.0, 164.9, 165.2, 172.6, 172.8, 197.5, 198.3. **HRMS–DART** ( $m/z$ ):  $[\text{M}+\text{H}]^+$  calcd for  $\text{C}_{17}\text{H}_{17}\text{N}_2\text{O}_4\text{S}$ ; 345.0904, found 345.0905.

***N*-Ethyl-*N*-[1-oxo-1-(pyridin-2-yl)propan-2-yl]thiophene-3-carboxamide (8mf)**

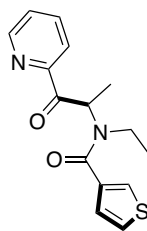

**8mf**

The product **8mf** was purified by flash chromatography on silica gel (100:0–50:50, hexane/EtOAc) (Fig. 4, 53.5 mg, 0.19 mmol, 93% isolated yield). Pale Yellow Solid. **M.p.** 54–57 °C. **IR** (neat) 741, 995, 1222, 1279, 1436, 1613, 1703, 2937, 2979, 3100  $\text{cm}^{-1}$ . Peaks for two rotamers (7:3) were given:  **$^1\text{H}$  NMR** (400 MHz,  $\text{CDCl}_3$ )  $\delta$  1.10–1.31 (m, 3H), 1.65–1.71 (m, 3H), 3.22–3.72 (m, 2H), 5.14 (m,  $0.70 \times 1\text{H}$ ), 5.97 (m,  $0.30 \times 1\text{H}$ ), 6.97–7.51 (m, 4H), 7.81 (m,  $0.70 \times 1\text{H}$ ), 7.95 (m, 1H), 8.22 (d,  $J = 7.6$  Hz,  $0.30 \times 1\text{H}$ ), 8.59 (m, 1H). Peaks for the minor rotamer were enclosed in parenthesis:  **$^{13}\text{C}$  NMR** (100.6 MHz,  $\text{CDCl}_3$ )  $\delta$  14.2, 15.4, (38.5), 44.2, 57.7, 122.3, 122.6, 125.3, 125.6, (126.3), (126.6), 127.8, (136.4), 136.9, 137.1, (147.7), (148.6), 149.4, 151.6, (154.0), 166.3, 196.9, (198.7) (only observed peaks). **HRMS–DART** ( $m/z$ ):  $[\text{M}+\text{H}]^+$  calcd for  $\text{C}_{15}\text{H}_{17}\text{N}_2\text{O}_2\text{S}$ ; 289.1005, found 289.1004.

***N*-Benzyl-*N*-[1-oxo-1-(pyridin-2-yl)propan-2-yl]thiophene-3-carboxamide (8mg-major)**

***N*-Ethyl-*N*-[2-oxo-1-phenyl-2-(pyridin-2-yl)ethyl]thiophene-3-carboxamide (8mg-minor)**

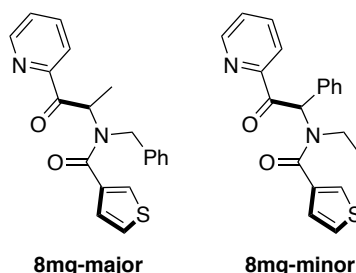

**8mg-major**

**8mg-minor**

The product **8mg** was purified by flash chromatography on silica gel (100:0–50:50, hexane/EtOAc) and Gel Permeation Chromatography (Fig. 4, **major**: 28.1 mg, 0.080 mmol, 40% isolated yield; **minor**: 10.6 mg, 0.030 mmol, 15% isolated yield).

**8mg-major**: Pale Yellow Oil. **IR** (neat) 697, 743, 974, 1421, 1435, 1621, 1704, 2940, 2989, 3061  $\text{cm}^{-1}$ . Peaks for two rotamers (7:3) were given:  **$^1\text{H}$  NMR** (400 MHz,  $\text{CDCl}_3$ )  $\delta$  1.45 (d,  $J = 7.2$  Hz, 3H), 4.61–5.01 (m, 2H), 5.56 (m,  $0.70 \times 1\text{H}$ ), 6.09 (m,  $0.30 \times 1\text{H}$ ), 7.06–7.26 (m, 3H), 7.26–7.44 (m, 6H), 7.69–7.83 (m,  $0.30 \times 1\text{H} + 1\text{H}$ ), 8.02 (m,  $0.70 \times 1\text{H}$ ), 8.62 (m, 1H). Peaks for the minor rotamer were enclosed in parenthesis:  **$^{13}\text{C}$  NMR** (100.6 MHz,  $\text{CDCl}_3$ )  $\delta$  14.5, 53.1, 57.7, (122.4), 122.8, 125.7, 126.4, 126.8, 127.0, 127.2, 127.5, (127.9), (128.2), 128.7, 128.8, (136.0), 137.0, (137.2), 138.2, 148.2, (149.5), 153.3, 167.4, 199.1 (only observed peaks). **HRMS–DART** ( $m/z$ ):  $[\text{M}+\text{H}]^+$  calcd for  $\text{C}_{20}\text{H}_{19}\text{N}_2\text{O}_2\text{S}$ ; 351.1162, found 351.1161.

**8mg-minor**: Pale Yellow Oil. **IR** (neat) 613, 743, 995, 1281, 1437, 1584, 1620, 1769, 2976, 3056  $\text{cm}^{-1}$ .  **$^1\text{H}$  NMR** (400 MHz,  $\text{CDCl}_3$ )  $\delta$  0.91 (t,  $J = 7.2$  Hz, 3H), 3.37–3.68 (m, 2H), 6.98 (m, 1H), 7.18 (dd,  $J = 1.2, 5.2$  Hz, 1H), 7.28–7.50 (m, 8H), 7.80 (t,  $J = 7.6$  Hz, 1H), 8.07 (d,  $J = 8.0$  Hz, 1H), 8.56 (m, 1H).  **$^{13}\text{C}$  NMR** (100.6 MHz,  $\text{CDCl}_3$ )  $\delta$  15.2, 43.2, 64.2, 122.6, 125.8, 125.9, 126.8, 126.9, 128.3,

128.9, 130.3, 134.5, 136.9, 137.0, 148.5, 153.2, 167.8, 196.0. **HRMS–DART** ( $m/z$ ):  $[M+H]^+$  calcd for  $C_{20}H_{19}N_2O_2S$ ; 351.1162, found 351.1163.

**{4-(2-Chlorodibenzo[*b,f*][1,4]oxazepin-11-yl)-1-(thiophene-3-carbonyl)piperazin-2-yl}(pyridin-2-yl)methanone (8mh)**

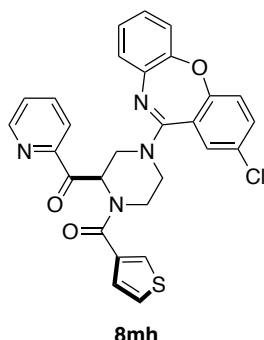

The product **8mh** was purified by flash chromatography on silica gel (100:0–50:50, hexane/EtOAc) (Fig. 4, 47.1 mg, 0.089 mmol, 45% isolated yield). **8mh** was purified by flash chromatography on silica gel (0–50% EtOAc/hexane). Pale Yellow solid. **M.p.** 174–180 °C. **IR** (neat) 737, 1240, 1347, 1425, 1470, 1560, 1587, 1604, 1704, 3059  $cm^{-1}$ . Peaks for two rotamers (1:1) were given: **<sup>1</sup>H NMR** (400 MHz,  $CDCl_3$ )  $\delta$  3.26–4.13 (m,  $0.50 \times 1H + 5H$ ), 4.69–4.72 (m,  $0.50 \times 1H$ ), 5.01 (bs, 1H), 5.97 (bs,  $0.50 \times 1H$ ), 6.53–7.91 (m,  $0.50 \times 1H + 12H$ ), 8.51–8.63 (m,  $0.50 \times 1H$ ). Peaks for two rotamers were given: **<sup>13</sup>C NMR** (100.6 MHz,  $CDCl_3$ )  $\delta$  29.7, 40.0, 40.1, 45.4, 45.7, 49.0, 56.0, 60.6, 70.6, 120.1, 120.4, 122.7, 124.5, 124.9, 125.4, 126.0, 126.3, 126.6, 127.0, 127.1, 128.5, 130.2, 132.6, 136.0, 136.9, 148.5, 151.6, 159.1, 167.2, 196.3 (only observed peaks). **HRMS–ESI** ( $m/z$ ):  $[M+H]^+$  calcd for  $C_{28}H_{22}ClN_4O_3S$ ; 529.1096, found 529.1092.

**{(4*R*,5*S*)-5-[(Benzo[*d*][1,3]dioxol-5-yloxy)methyl]-4-(4-fluorophenyl)-1-(thiophene-3-carbonyl)piperidin-2-yl}(pyridin-2-yl)methanone (8mi)**

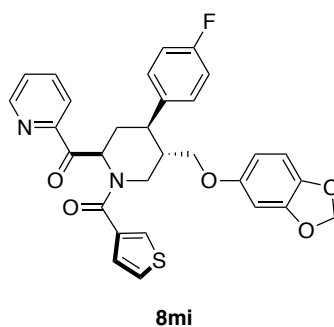

The product **8mi** was purified by flash chromatography on silica gel (100:0–50:50, hexane/EtOAc) (Fig. 4, 49.3 mg, 0.091 mmol, 45% isolated yield). White Solid. **M.p.** 75–80 °C. **IR** (neat) 727, 833, 908, 1180, 1486, 1509, 1622, 2244, 2884, 3054  $cm^{-1}$ . Peaks for two rotamers and two diastereomers were given (the ratios were not determined): **<sup>1</sup>H NMR** (400 MHz,  $CDCl_3$ )  $\delta$  1.61–2.19 (m, 3H), 2.30–3.05 (m, 3H), 3.36–4.39 (m, 5H), 5.64–6.38 (m,  $0.50 \times 1H + 5H$ ), 6.59–6.65 (m, 1H), 6.77 (d,  $J = 5.2$  Hz,  $0.50 \times 1H$ ), 6.95–7.64 (m, 4H), 7.77–8.10 (m, 2H), 8.49 (d,  $J = 4.0$  Hz,  $0.50 \times 1H$ ), 8.65 (s,  $0.50 \times 1H$ ). Peaks for two rotamers and two diastereomers were given: **<sup>13</sup>C NMR** (100.6 MHz,  $CDCl_3$ )  $\delta$  33.5, 33.7, 34.5, 35.4, 38.3, 40.0, 40.5, 41.6, 41.7, 42.2, 42.5, 43.0, 44.0, 44.4, 45.0, 45.7, 47.4, 47.6,

48.8, 50.4, 52.2, 54.7, 57.5, 59.7, 65.5, 68.2, 68.4, 68.7, 73.7, 97.8, 97.9, 100.8, 100.9, 101.1, 101.1, 104.5, 105.4, 105.4, 105.5, 107.2, 107.5, 107.7, 107.8, 115.4 (d,  $J_{C-F} = 20.9$  Hz), 115.4 (d,  $J_{C-F} = 21.0$  Hz), 115.6 (d,  $J_{C-F} = 21.1$  Hz), 121.8, 122.5, 122.5, 125.7, 125.7, 125.9, 126.1, 126.5, 127.1, 127.2, 127.4, 128.6 (d,  $J_{C-F} = 7.8$  Hz), 128.8 (d,  $J_{C-F} = 7.6$  Hz), 128.8 (d,  $J_{C-F} = 7.7$  Hz), 129.0 (d,  $J_{C-F} = 7.7$  Hz), 132.3, 135.6, 136.0, 136.2, 136.5, 136.8, 136.9, 137.0, 137.2, 138.0 (d,  $J_{C-F} = 3.0$  Hz), 138.5 (d,  $J_{C-F} = 3.0$  Hz), 138.9, 141.3, 141.5, 141.7, 141.8, 147.4, 147.8, 148.1, 148.1, 148.4, 148.5, 148.8, 149.0, 151.4, 151.8, 152.6, 153.0, 153.6, 153.7, 154.1, 161.5 (ddd,  $J_{C-F} = 244.8$  Hz), 161.5 (ddd,  $J_{C-F} = 245.0$  Hz), 161.6 (ddd,  $J_{C-F} = 245.4$  Hz), 161.7 (ddd,  $J_{C-F} = 246.1$  Hz), 165.6, 167.0, 167.3, 167.9, 197.0, 199.7, 200.3 (only observed peaks).  $^{19}\text{F NMR}$  (376.5 MHz,  $\text{CDCl}_3$ )  $\delta$  -116.0, -115.8, -115.6, -115.5. **HRMS-DART** ( $m/z$ ):  $[\text{M}+\text{H}]^+$  calcd for  $\text{C}_{30}\text{H}_{26}\text{FN}_2\text{O}_5\text{S}$ ; 545.1541, found 545.1546.

### [2-(4-Methylbenzoyl)pyrrolidin-1-yl](thiophen-3-yl)methanone (8ba)

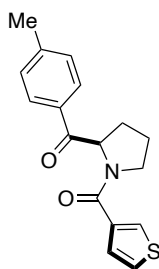

**8ba**

The product **8ba** was purified by flash chromatography on silica gel (100:0–70:30, hexane/EtOAc) and Gel Permeation Chromatography (Fig. 4, 35.4 mg, 0.12 mmol, 59% isolated yield). Pale Yellow Solid. **M.p.** 112–113 °C. **IR** (neat) 739, 1180, 1228, 1359, 1435, 1605, 1688, 2874, 2973, 3096  $\text{cm}^{-1}$ . Peaks for two rotamers (83:17) were given:  $^1\text{H NMR}$  (400 MHz,  $\text{CDCl}_3$ )  $\delta$  1.93–2.16 (m, 3H), 2.32–2.42 (m, 4H), 3.80–3.94 (m, 2H), 5.38 (m,  $0.17 \times 1\text{H}$ ), 5.68 (m,  $0.83 \times 1\text{H}$ ), 7.12–7.15 (m,  $0.17 \times 2\text{H}$ ), 7.22–7.31 (m, 3H), 7.43 (d,  $J = 5.2$  Hz,  $0.83 \times 1\text{H}$ ), 7.66–7.68 (m,  $0.17 \times 2\text{H}$ ), 7.78 (m,  $0.83 \times 1\text{H}$ ), 7.96 (d,  $J = 8.0$  Hz,  $0.83 \times 2\text{H}$ ). Peaks for the minor rotamer were enclosed in parenthesis:  $^{13}\text{C NMR}$  (100.6 MHz,  $\text{CDCl}_3$ )  $\delta$  21.6, (22.2), 25.4, 29.2, (31.3), (46.9), 49.7, 61.6, (63.9), 125.2, (125.7), (125.8), (126.9), 127.9, 128.1, (128.3), 128.6, 129.3, (129.5), 132.8, 137.1, 144.1, (144.6), 163.7, (165.6), 197.3, (197.6) (only observed peaks). **HRMS-DART** ( $m/z$ ):  $[\text{M}+\text{H}]^+$  calcd for  $\text{C}_{17}\text{H}_{18}\text{NO}_2\text{S}$ ; 300.1053, found 300.1053.

### {2-[4-(*tert*-Butyl)benzoyl]pyrrolidin-1-yl}(thiophen-3-yl)methanone (8ca)

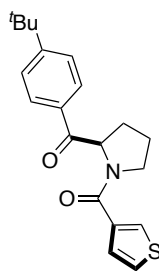

**8ca**

The product **8ca** was purified by flash chromatography on silica gel (100:0–50:50, hexane/EtOAc) (Fig. 4, 36.9 mg, 0.11 mmol, 54% isolated yield). Pale Yellow Solid. **M.p.** 153–157 °C. **IR** (neat) 739,



1228, 1361, 1435, 1606, 1688, 2871, 2963, 3089, 3450  $\text{cm}^{-1}$ . Peaks for two rotamers (83:17) were given:  $^1\text{H NMR}$  (400 MHz,  $\text{CDCl}_3$ )  $\delta$  1.35 (s, 9H), 1.95–2.17 (m, 3H), 2.37 (m, 1H), 3.81–3.95 (m, 2H), 5.39 (m,  $0.17 \times 1\text{H}$ ), 5.70 (m,  $0.83 \times 1\text{H}$ ), 7.14–7.17 (m,  $0.17 \times 2\text{H}$ ), 7.30 (m, 1H), 7.44–7.49 (m,  $0.17 \times 1\text{H} + 1\text{H}$ ), 7.49–7.51 (d,  $J = 8.0$  Hz,  $0.83 \times 2\text{H}$ ), 7.71–7.73 (m,  $0.17 \times 2\text{H}$ ), 7.78 (m,  $0.83 \times 1\text{H}$ ), 7.99–8.01 (d,  $J = 8.0$  Hz,  $0.83 \times 2\text{H}$ ). Peaks for the minor rotamer were enclosed in parenthesis:  $^{13}\text{C NMR}$  (100.6 MHz,  $\text{CDCl}_3$ )  $\delta$  (22.2), 25.5, (27.5), 29.2, 31.0, (31.2), (31.3), 35.1, (46.9), 49.7, 61.5, (64.1), 125.2, 125.6, (125.8), (127.0), 127.9, 128.1, (128.2), (128.3), 128.5, (130.5), 132.7, 137.1, 157.0, 163.7, 197.4 (only observed peaks). **HRMS–DART** ( $m/z$ ):  $[\text{M}+\text{H}]^+$  calcd for  $\text{C}_{20}\text{H}_{24}\text{NO}_2\text{S}$ ; 342.1522, found 342.1520

### Thiophen-3-yl{2-[4-(trifluoromethoxy)benzoyl]pyrrolidin-1-yl}methanone (8fa)

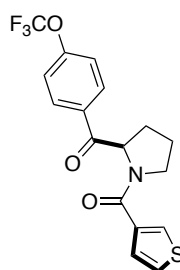

8fa

The product **8fa** was purified by flash chromatography on silica gel (100:0–50:50, hexane/EtOAc) (Fig. 4, 51.2 mg, 0.14 mmol, 69% isolated yield). Pale Yellow Solid. **M.p.** 84–86 °C. **IR** (neat) 1165, 1208, 1256, 1434, 1602, 1695, 2877, 2976, 3106, 3503  $\text{cm}^{-1}$ . Peaks for two rotamers (91:9) were given:  $^1\text{H NMR}$  (400 MHz,  $\text{CDCl}_3$ )  $\delta$  1.94–2.09 (m, 2H), 2.15 (m, 1H), 2.37 (m, 1H), 3.83–3.96 (m, 2H), 5.36 (m,  $0.09 \times 1\text{H}$ ), 5.64 (m,  $0.91 \times 1\text{H}$ ), 7.10 (m,  $0.09 \times 1\text{H}$ ), 7.18 (m,  $0.09 \times 1\text{H}$ ), 7.31–7.33 (m,  $0.91 \times 1\text{H} + 2\text{H}$ ), 7.43 (d,  $J = 5.2$  Hz,  $0.91 \times 1\text{H}$ ), 7.80 (m, 1H), 8.12 (d,  $J = 8.4$  Hz, 2H). Peaks for the minor rotamer were enclosed in parenthesis:  $^{13}\text{C NMR}$  (100.6 MHz,  $\text{CDCl}_3$ )  $\delta$  22.3, 25.6, 29.0, (31.2), 46.9, (49.7), 61.5, (63.9), 120.2 (q,  $J_{\text{C-F}} = 258.8$  Hz), 120.5, 125.4, (125.6), (126.1), (126.7), 127.8, 128.4, 130.2, 130.5, 133.8, 136.7, 152.7 (d,  $J_{\text{C-F}} = 1.2$  Hz), 163.7, 196.7 (only observed peaks).  $^{19}\text{F NMR}$  (376.5 MHz,  $\text{CDCl}_3$ )  $\delta$  -57.6. **HRMS–DART** ( $m/z$ ):  $[\text{M}+\text{H}]^+$  calcd for  $\text{C}_{17}\text{H}_{15}\text{F}_3\text{NO}_3\text{S}$ ; 370.0719, found 370.0719.

### Thiophen-3-yl{2-[4-(trifluoromethyl)benzoyl]pyrrolidin-1-yl}methanone (8ga)

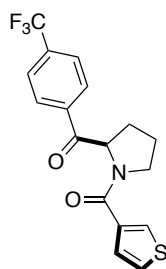

8ga

The product **8ga** was purified by flash chromatography on silica gel (100:0–60:40, hexane/EtOAc) and Gel Permeation Chromatography (Fig. 4, 46.6 mg, 0.13 mmol, 66% isolated yield). Pale Yellow Solid. **M.p.** 116–118 °C. **IR** (neat) 1066, 1130, 1227, 1324, 1435, 1609, 1697, 2877, 2976, 3106  $\text{cm}^{-1}$

<sup>1</sup>. Peaks for two rotamers (92:8) were given: <sup>1</sup>H NMR (400 MHz, CDCl<sub>3</sub>) δ 1.94–2.22 (m, 3H), 2.38 (m, 1H), 3.84–3.97 (m, 2H), 5.39 (m, 0.08 × 1H), 5.64 (m, 0.92 × 1H), 7.09 (m, 0.08 × 1H), 7.18 (m, 0.08 × 1H), 7.33 (m, 1H), 7.43 (d, *J* = 4.8 Hz, 0.92 × 1H), 7.69–7.85 (m, 0.08 × 1H + 3H), 8.16 (d, *J* = 8.0 Hz, 0.92 × 2H). Peaks for the minor rotamer were enclosed in parenthesis: <sup>13</sup>C NMR (100.6 MHz, CDCl<sub>3</sub>) δ (22.3), 25.6, 28.9, (31.1), (46.9), 49.7, 61.8, (64.0), 123.5 (q, *J*<sub>C-F</sub> = 272.7 Hz), 125.4, 125.7 (q, *J*<sub>C-F</sub> = 3.6 Hz), (126.2), (126.7), 127.8, 128.4, 128.8, 134.4 (q, *J*<sub>C-F</sub> = 32.7 Hz), 136.6, 138.4, 163.7, 197.4 (only observed peaks). <sup>19</sup>F NMR (376.5 MHz, CDCl<sub>3</sub>) δ –63.1. HRMS–DART (*m/z*): [M+H]<sup>+</sup> calcd for C<sub>17</sub>H<sub>15</sub>F<sub>3</sub>NO<sub>2</sub>S; 354.0770, found 354.0770.

### [2-(4-Methoxybenzoyl)pyrrolidin-1-yl](thiophen-3-yl)methanone (8ha)

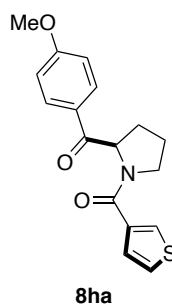

The product **8ha** was purified by flash chromatography on silica gel (100:0–50:50, hexane/EtOAc) and Gel Permeation Chromatography (Fig. 4, 25.7 mg, 0.086 mmol, 43% isolated yield). Pale Yellow Solid. **M.p.** 119–122 °C. IR (neat) 738, 1169, 1230, 1261, 1434, 1597, 1681, 2875, 2970, 3104 cm<sup>-1</sup>. Peaks for two rotamers (83:17) were given: <sup>1</sup>H NMR (400 MHz, CDCl<sub>3</sub>) δ 1.93–2.17 (m, 3H), 2.35 (m, 1H), 3.80–3.94 (m, 5H), 5.36 (m, 0.17 × 1H), 5.68 (m, 0.83 × 1H), 6.91 (d, *J* = 8.4 Hz, 0.17 × 2H), 6.94 (d, *J* = 8.0 Hz, 0.83 × 2H), 7.12–7.15 (m, 0.17 × 2H), 7.30 (m, 1H), 7.59 (d, *J* = 5.2 Hz, 0.83 × 1H), 7.77–7.78 (m, 0.17 × 1H + 1H), 8.05 (d, *J* = 8.4 Hz, 0.83 × 2H). Peaks for the minor rotamer were enclosed in parenthesis: <sup>13</sup>C NMR (100.6 MHz, CDCl<sub>3</sub>) δ (22.3), 25.4, 29.3, (31.5), (47.0), 49.7, 55.5, 61.3, (63.7), 113.8, (114.0), 125.2, (125.7), (125.8), (126.8), (127.0), 127.9, 128.1, 128.2, (130.5), 130.8, 137.2, (137.8), 163.6, 163.7, (163.9), 196.2, (196.4) (only observed peaks). HRMS–DART (*m/z*): [M+H]<sup>+</sup> calcd for C<sub>17</sub>H<sub>18</sub>NO<sub>3</sub>S; 316.1002, found 316.1003.

### {2-[4-(Methylthio)benzoyl]pyrrolidin-1-yl}(thiophen-3-yl)methanone (8ia)

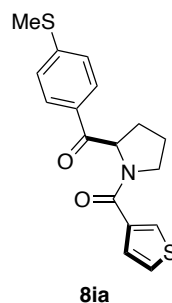

The product **8ia** was purified by flash chromatography on silica gel (100:0–50:50, hexane/EtOAc) and Gel Permeation Chromatography (Fig. 4, 21.2 mg, 0.064 mmol, 32% isolated yield). White Solid. **M.p.** 117–119 °C. IR (neat) 741, 1093, 1227, 1435, 1587, 1611, 1683, 2873, 2975, 3100 cm<sup>-1</sup>. Peaks for two rotamers (85:15) were given: <sup>1</sup>H NMR (400 MHz, CDCl<sub>3</sub>) δ 1.91–2.17 (m, 3H), 2.36 (m,

1H), 2.53 (s, 3H), 3.81–3.94 (m, 2H), 5.35 (m, 0.15 × 1H), 5.66 (m, 0.85 × 1H), 7.10 (m, 0.15 × 1H), 7.11 (m, 0.15 × 1H), 7.16–7.32 (m, 3H), 7.43 (m, 0.85 × 1H), 7.68–7.70 (m, 0.15 × 2H), 7.78 (m, 0.85 × 1H), 7.96–7.98 (m, 0.85 × 2H). Peaks for the minor rotamer were enclosed in parenthesis: <sup>13</sup>C NMR (100.6 MHz, CDCl<sub>3</sub>) δ(14.6), 14.8, (22.3), 25.5, 29.2, (31.4), (47.0), 49.7, 61.4, 125.1, 125.3, (125.7), (125.9), 127.9, 128.2, (128.5), 128.9, 131.5, 137.1, 146.2, 163.7, 196.8 (only observed peaks). HRMS–DART (*m/z*): [M+H]<sup>+</sup> calcd for C<sub>17</sub>H<sub>18</sub>NO<sub>2</sub>S<sub>2</sub>; 332.0774, found 332.0774.

### [2-(4-Bromobenzoyl)pyrrolidin-1-yl](thiophen-3-yl)methanone (**8ea**)

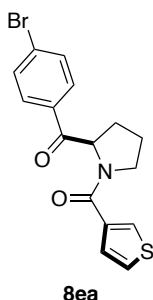

The product **8ea** was purified by flash chromatography on silica gel (100:0–60:40, hexane/EtOAc) and Gel Permeation Chromatography (Fig. 4, 37.2 mg, 0.10 mmol, 51% isolated yield). Pale Yellow Solid. **M.p.** 127–129 °C. **IR** (neat) 740, 1006, 1221, 1436, 1584, 1610, 1692, 2874, 2974, 3091 cm<sup>-1</sup>. Peaks for two rotamers (89:11) were given: <sup>1</sup>H NMR (400 MHz, CDCl<sub>3</sub>) δ1.92–2.19 (m, 3H), 2.35 (m, 1H), 3.82–3.95 (m, 2H), 5.34 (m, 0.11 × 1H), 5.61 (m, 0.89 × 1H), 7.08 (m, 0.11 × 1H), 7.17 (m, 0.11 × 1H), 7.32 (m, 1H), 7.43 (d, *J* = 4.8 Hz, 0.89 × 1H), 7.57–7.64 (m, 0.11 × 2H + 2H), 7.78 (m, 0.89 × 1H), 7.92 (d, *J* = 8.0 Hz, 0.89 × 2H). Peaks for the minor rotamer were enclosed in parenthesis: <sup>13</sup>C NMR (100.6 MHz, CDCl<sub>3</sub>) δ(22.3), 25.5, 29.0, (31.2), (46.9), 49.7, 61.5, (63.8), 125.4, (125.6), (126.1), (126.7), 127.9, 128.3, 128.4, (129.6), 130.0, 132.0, (132.2), 134.2, 136.8, 163.7, 197.1 (only observed peaks). HRMS–DART (*m/z*): [M+H]<sup>+</sup> calcd for C<sub>16</sub>H<sub>15</sub>BrNO<sub>2</sub>S; 364.0001, found 364.0001.

### Thiophen-2-yl[1-(thiophene-3-carbonyl)pyrrolidin-2-yl]methanone (**8ja**)

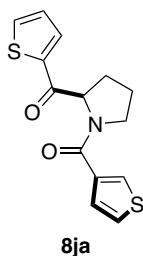

The product **8ja** was purified by flash chromatography on silica gel (100:0–60:40, hexane/EtOAc) and Gel Permeation Chromatography (Fig. 4, 26.9 mg, 0.092 mmol, 46% isolated yield). Pale Yellow Solid. **M.p.** 110–112 °C. **IR** (neat) 738, 1234, 1357, 1414, 1519, 1608, 1666, 2874, 2974, 3088 cm<sup>-1</sup>. Peaks for two rotamers (86:14) were given: <sup>1</sup>H NMR (400 MHz, CDCl<sub>3</sub>) δ1.97–2.22 (m, 3H), 2.37 (m, 1H), 3.81–3.95 (m, 2H), 5.17 (m, 0.14 × 1H), 5.49 (m, 0.86 × 1H), 7.12 (m, 0.14 × 2H), 7.17 (t, *J* = 4.2 Hz, 1H), 7.31 (m, 0.86 × 1H), 7.34 (m, 0.14 × 1H), 7.43 (d, *J* = 4.8 Hz, 0.86 × 1H), 7.55 (m, 0.14 × 1H), 7.67 (d, *J* = 5.2 Hz, 1H), 7.78 (m, 0.86 × 1H), 7.90 (d, *J* = 4.0 Hz, 0.86 × 1H). Peaks for the minor rotamer were enclosed in parenthesis: <sup>13</sup>C NMR (100.6 MHz, CDCl<sub>3</sub>) δ(22.5), 25.5, 29.5,

(32.0), (47.1), 49.7, 62.7, (64.8), 125.3, (125.9), (126.9), 127.9, 128.1, 128.3, (132.2), 132.4, 133.8, (134.5), 136.9, (137.5), 140.4, (141.6), 163.8, (165.7), 190.7, (191.2) (only observed peaks). **HRMS–DART** ( $m/z$ ):  $[M+H]^+$  calcd for  $C_{14}H_{14}NO_2S_2$ ; 292.0461, found 292.0468.

### Pyrrolidine-1,2-diylbis(thiophen-3-ylmethanone) (**8na**)

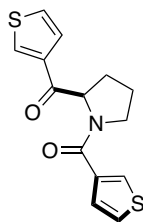

**8na**

The product **8na** was purified by flash chromatography on silica gel (100:0–60:40, hexane/EtOAc) and Gel Permeation Chromatography (Fig. 4, 32.4 mg, 0.11 mmol, 56% isolated yield). Pale Yellow Oil. **IR** (neat) 740, 1232, 1435, 1521, 1609, 1681, 2875, 2973, 3088, 3505  $cm^{-1}$ . Peaks for two rotamers (86:14) were given:  **$^1H$  NMR** (400 MHz,  $CDCl_3$ )  $\delta$  1.98–2.17 (m, 3H), 2.34 (m, 1H), 3.80–3.93 (m, 2H), 5.17 (m,  $0.14 \times 1H$ ), 5.50 (m,  $0.86 \times 1H$ ), 7.12 (m,  $0.14 \times 1H$ ), 7.18 (m,  $0.14 \times 1H$ ), 7.30–7.35 (m, 2H), 7.43 (d,  $J = 4.8$  Hz, 1H), 7.63 (d,  $J = 4.8$  Hz,  $0.86 \times 1H$ ), 7.78 (m,  $0.86 \times 1H$ ), 7.91 (m,  $0.14 \times 1H$ ), 8.23 (m,  $0.86 \times 1H$ ). Peaks for the minor rotamer were enclosed in parenthesis:  **$^{13}C$  NMR** (100.6 MHz,  $CDCl_3$ )  $\delta$  (22.3), 25.4, 29.1, (31.4), (47.0), 49.7, 62.8, (65.0), 125.3, (125.8), (125.8), 126.3, (126.8), (126.9), 127.2, 127.9, 128.2, (132.5), 132.6, (136.9), 137.7, (138.6), 140.0, 163.7, (165.6), 192.0, (192.4) (only observed peaks). **HRMS–DART** ( $m/z$ ):  $[M+H]^+$  calcd for  $C_{14}H_{14}NO_2S_2$ ; 292.0461, found 292.0460.

### [2-(Furan-3-carbonyl)pyrrolidin-1-yl](thiophen-3-yl)methanone (**8oa**)

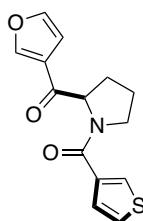

**8oa**

The product **8oa** was purified by flash chromatography on silica gel (100:0–60:40, hexane/EtOAc) and Gel Permeation Chromatography (Fig. 4, 29.3 mg, 0.11 mmol, 53% isolated yield). Pale Yellow Solid. **M.p.** 124–126  $^{\circ}C$ . **IR** (neat) 741, 1154, 1434, 1512, 1608, 1684, 2876, 2974, 3123, 3486  $cm^{-1}$ . Peaks for two rotamers (87:13) were given:  **$^1H$  NMR** (400 MHz,  $CDCl_3$ )  $\delta$  1.95–2.05 (m, 2H), 2.13 (m, 1H), 2.30 (m, 1H), 3.79–3.92 (m, 2H), 4.92 (m,  $0.13 \times 1H$ ), 5.24 (m,  $0.87 \times 1H$ ), 6.69 (m,  $0.13 \times 1H$ ), 6.84 (m,  $0.87 \times 1H$ ), 7.12 (m,  $0.13 \times 1H$ ), 7.20 (m,  $0.13 \times 1H$ ), 7.32 (m, 1H), 7.44 (m,  $0.87 \times 1H + 1H$ ), 7.77 (m,  $0.87 \times 1H$ ), 7.86 (m,  $0.13 \times 1H$ ), 8.21 (m,  $0.87 \times 1H$ ). Peaks for the minor rotamer were enclosed in parenthesis:  **$^{13}C$  NMR** (100.6 MHz,  $CDCl_3$ )  $\delta$  (22.4), 25.5, 29.1, (31.6), (47.1), 49.7, 63.3, (65.6), (108.6), 108.9, 125.3, 125.5, (125.9), (126.9), 127.8, 128.3, 136.8, 144.1, (144.3), (147.0), 147.5, 163.8, 192.7, (193.3) (only observed peaks). **HRMS–DART** ( $m/z$ ):  $[M+H]^+$  calcd for  $C_{14}H_{14}NO_3S$ ; 276.0689, found 276.0684.

## 2-Methyl-6-[(thiophene-3-carbonyl)prolyl]pyridine (**8pa**)

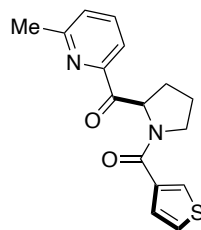

**8pa**

The product **8pa** was purified by flash chromatography on silica gel (100:0–60:40, hexane/EtOAc) (Fig. 4, 57.8 mg, 0.19 mmol, 96% isolated yield). Yellow Oil. **IR** (neat) 734, 811, 1357, 1430, 1605, 1703, 2874, 2973, 3103, 3469  $\text{cm}^{-1}$ . Peaks for two rotamers (82:18) were given:  **$^1\text{H}$  NMR** (400 MHz,  $\text{CDCl}_3$ )  $\delta$  1.95–2.12 (m, 3H), 2.45–2.61 (m, 4H), 3.83–3.95 (m, 2H), 6.05 (m,  $0.18 \times 1\text{H}$ ), 6.12 (m,  $0.82 \times 1\text{H}$ ), 7.10–7.16 (m,  $0.18 \times 2\text{H}$ ), 7.29–7.33 (m,  $0.82 \times 1\text{H} + 1\text{H}$ ), 7.37 (m,  $0.18 \times 1\text{H}$ ), 7.43 (d,  $J = 4.8$  Hz,  $0.82 \times 1\text{H}$ ), 7.69–7.72 (m,  $0.18 \times 1\text{H} + 1\text{H}$ ), 7.77 (m,  $0.82 \times 1\text{H}$ ), 7.90 (d,  $J = 8.0$  Hz,  $0.82 \times 1\text{H}$ ). Peaks for the minor rotamer were enclosed in parenthesis:  **$^{13}\text{C}$  NMR** (100.6 MHz,  $\text{CDCl}_3$ )  $\delta$  (22.4), 24.4, 25.6, 29.3, (31.5), (47.4), 49.9, 61.5, (63.0), 119.6, 125.1, (125.3), (125.8), 126.8, (127.2), (127.2), 127.9 ( $\times 2\text{C}$ ), 136.8, (136.9), 137.2, (137.8), (150.7), 151.6, 157.7, (157.9), 163.4, (165.3), 198.5, (199.2) (only observed peaks). **HRMS–DART** ( $m/z$ ):  $[\text{M}+\text{H}]^+$  calcd for  $\text{C}_{16}\text{H}_{17}\text{N}_2\text{O}_2\text{S}$ ; 301.1005, found 301.1007.

## 2-[(Thiophene-3-carbonyl)prolyl]quinoline (**8qa**)

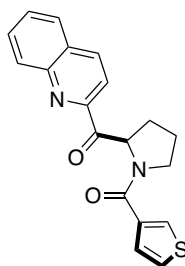

**8qa**

The product **8qa** was purified by flash chromatography on silica gel (100:0–60:40, hexane/EtOAc) (Fig. 4, 56.0 mg, 0.17 mmol, 83% isolated yield). Yellow solid. **M.p.** 117–119 °C. **IR** (neat) 740, 839, 1359, 1430, 1604, 1702, 2875, 2976, 3105, 3460  $\text{cm}^{-1}$ . Peaks for two rotamers (84:16) were given:  **$^1\text{H}$  NMR** (400 MHz,  $\text{CDCl}_3$ )  $\delta$  1.94–2.16 (m, 3H), 2.63 (m, 1H), 3.87–4.01 (m, 2H), 6.31 (m, 1H), 7.05 (m,  $0.16 \times 1\text{H}$ ), 7.18 (m,  $0.16 \times 1\text{H}$ ), 7.30 (m,  $0.84 \times 1\text{H}$ ), 7.43 (m, 1H), 7.66 (m, 1H), 7.76–7.80 (m,  $0.84 \times 1\text{H} + 1\text{H}$ ), 7.87 (m, 1H), 8.00 (m,  $0.16 \times 1\text{H}$ ), 8.12 (m,  $0.16 \times 1\text{H}$ ), 8.16–8.21 (m,  $0.84 \times 2\text{H}$ ), 8.27 (m, 1H). Peaks for the minor rotamer were enclosed in parenthesis:  **$^{13}\text{C}$  NMR** (100.6 MHz,  $\text{CDCl}_3$ )  $\delta$  (22.5), 25.8, 29.5, (31.8), (47.5), 50.0, 61.5, (63.0), (118.4), 118.7, 125.1, (125.4), (125.9), (127.2), 127.6, (127.6), 127.9, 128.0, 128.5, (128.9), 129.6, 129.8, (130.1), (130.5), 130.6, 136.8, (137.1), 137.1, (137.8), (146.9), 147.0, (150.8), 151.8, 163.5, (165.4), 198.6, (199.1) (only observed peaks). **HRMS–DART** ( $m/z$ ):  $[\text{M}+\text{H}]^+$  calcd for  $\text{C}_{19}\text{H}_{17}\text{N}_2\text{O}_2\text{S}$ ; 337.1005, found 337.1007.

**(2-Benzoylpyrrolidin-1-yl)(thiophen-3-yl)methanone (8aa)**

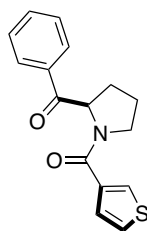

**8aa**

The yield (Table 2, 74%) of **8aa** in the crude was determined by  $^1\text{H-NMR}$  analysis using 1,1,2,2-tetrachloroethane as an internal standard. The product **8aa** was purified by flash chromatography on silica gel (100:0–80:20, hexane/EtOAc) (34.1 mg, 0.12 mmol, 60% isolated yield). Pale Yellow Oil. **IR** (neat) 739, 1223, 1359, 1434, 1610, 1690, 2874, 2973, 3103, 3467  $\text{cm}^{-1}$ . Peaks for two rotamers (86:14) were given:  $^1\text{H NMR}$  (400 MHz,  $\text{CDCl}_3$ )  $\delta$  1.95–2.18 (m, 3H), 2.38 (m, 1H), 3.82–3.96 (m, 2H), 5.39 (m,  $0.14 \times 1\text{H}$ ), 5.70 (m,  $0.86 \times 1\text{H}$ ), 7.11–7.16 (m,  $0.14 \times 2\text{H}$ ), 7.31 (m, 1H), 7.43–7.51 (m,  $0.86 \times 1\text{H} + 2\text{H}$ ), 7.59 (m, 1H), 7.76–7.80 (m,  $0.14 \times 1\text{H} + 1\text{H}$ ), 8.05–8.07 (m,  $0.86 \times 2\text{H}$ ). Peaks for the minor rotamer were enclosed in parenthesis:  $^{13}\text{C NMR}$  (100.6 MHz,  $\text{CDCl}_3$ )  $\delta$  (22.3), 25.4, 29.1, (31.2), (46.9), 49.7, 61.7, (64.0), 125.3, (125.7), (125.9), (126.8), 127.9, 128.1, 128.5, 128.6, (128.8), 133.2, (133.6), 135.4, (137.0), 137.8, 163.7, 197.8 (only observed peaks). **HRMS–DART** ( $m/z$ ):  $[\text{M}+\text{H}]^+$  calcd for  $\text{C}_{16}\text{H}_{16}\text{NO}_2\text{S}$ ; 286.0896, found 286.0895.

**(2-Benzoylpyrrolidin-1-yl)(thiophen-2-yl)methanone (8aa-A)**

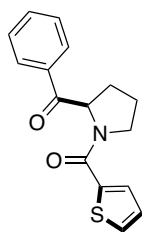

**8aa-A**

The yield (Table 2, 24%) of **8aa-A** in the crude was determined by  $^1\text{H-NMR}$  analysis using 1,1,2,2-tetrachloroethane as an internal standard. The product **8aa-A** was purified by flash chromatography on silica gel (100:0–55:45, hexane/EtOAc) (11.4 mg, 0.040 mmol, 20% isolated yield). Pale Yellow Oil. **IR** (neat) 735, 1224, 1403, 1433, 1522, 1597, 1691, 2875, 2974, 3072  $\text{cm}^{-1}$ . Peaks for two rotamers (89:11) were given:  $^1\text{H NMR}$  (400 MHz,  $\text{CDCl}_3$ )  $\delta$  2.00 (m, 1H), 2.11 (m, 1H), 2.22 (m, 1H), 2.35 (m, 1H), 3.92–4.13 (m, 2H), 5.73 (dd,  $J = 8.6, 4.4$  Hz, 1H), 6.85 (m,  $0.11 \times 1\text{H}$ ), 7.10 (m,  $0.89 \times 1\text{H}$ ), 7.21 (m,  $0.11 \times 1\text{H}$ ), 7.29 (m,  $0.11 \times 1\text{H}$ ), 7.46–7.51 (m,  $0.89 \times 1\text{H} + 2\text{H}$ ), 7.58 (m, 1H), 7.63 (d,  $J = 3.6$  Hz,  $0.89 \times 1\text{H}$ ), 7.93 (m,  $0.11 \times 2\text{H}$ ), 8.05 (d,  $J = 7.6$  Hz,  $0.89 \times 2\text{H}$ ).  $^{13}\text{C NMR}$  (100.6 MHz,  $\text{CDCl}_3$ )  $\delta$  25.5, 28.8, 49.4, 62.4, 127.2, 128.5, 128.6, 130.2, 130.3, 133.3, 135.3, 138.6, 161.4, 197.8. **HRMS–DART** ( $m/z$ ):  $[\text{M}+\text{H}]^+$  calcd for  $\text{C}_{16}\text{H}_{16}\text{NO}_2\text{S}$ ; 286.0896, found 286.0893.

### (2-Benzoylpyrrolidin-1-yl)(furan-3-yl)methanone (**8aa-B**)

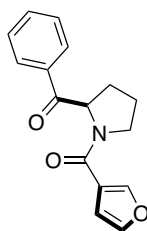

**8aa-B**

The yield (Table 2, 27%) of **8aa-B** in the crude was determined by  $^1\text{H-NMR}$  analysis using 1,1,2,2-tetrachloroethane as an internal standard. The product **8aa-B** was purified by flash chromatography on silica gel (100:0–55:45, hexane/EtOAc) (13.0 mg, 0.048 mmol, 24% isolated yield). Pale Yellow Solid. **M.p.** 102–104 °C. **IR** (neat) 751, 904, 1224, 1431, 1564, 1616, 1691, 2877, 2975, 3142  $\text{cm}^{-1}$ . Peaks for two rotamers (89:11) were given:  $^1\text{H NMR}$  (400 MHz,  $\text{CDCl}_3$ )  $\delta$  1.95–2.23 (m, 3H), 2.34 (m, 1H), 3.82–3.99 (m, 2H), 5.35 (m, 0.11  $\times$  1H), 5.68 (dd,  $J = 8.8, 4.4$  Hz, 0.89  $\times$  1H), 6.46 (m, 0.11  $\times$  1H), 6.78 (m, 0.89  $\times$  1H), 7.25–7.26 (m, 0.11  $\times$  2H), 7.43 (m, 0.89  $\times$  1H), 7.47–7.52 (m, 0.11  $\times$  1H + 2H), 7.60 (m, 1H), 7.90 (m, 1H), 8.04–8.06 (m, 0.89  $\times$  2H). Peaks for the minor rotamer were enclosed in parenthesis:  $^{13}\text{C NMR}$  (100.6 MHz,  $\text{CDCl}_3$ )  $\delta$  (22.0), 25.2, 28.9, (31.4), (47.1), 48.7, 61.8, (63.7), 110.7, 122.0, (128.3), 128.5, 128.6, (129.0), 133.3, 135.3, 142.8, 144.7, 162.0, 197.8 (only observed peaks). **HRMS–DART** ( $m/z$ ):  $[\text{M}+\text{H}]^+$  calcd for  $\text{C}_{16}\text{H}_{16}\text{NO}_3$ ; 270.1125, found 270.1125.

### Pyrrolidine-1,2-diylbis(phenylmethanone) (**8aa-C**)

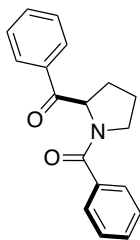

**8aa-C**

The yield (Table 2, 42%) of **8aa-C** in the crude was determined by  $^1\text{H-NMR}$  analysis using 1,1,2,2-tetrachloroethane as an internal standard. The product **8aa-C** was purified by flash chromatography on silica gel (100:0–50:50, hexane/EtOAc) (22.1 mg, 0.079 mmol, 40% isolated yield). White Solid. **M.p.** 100–101 °C. **IR** (neat) 701, 1224, 1416, 1447, 1600, 1626, 1692, 2876, 2975, 3059  $\text{cm}^{-1}$ . Peaks for two rotamers (83:17) were given:  $^1\text{H NMR}$  (400 MHz,  $\text{CDCl}_3$ )  $\delta$  1.91–2.10 (m, 3H), 2.38 (m, 1H), 3.62 (m, 0.83  $\times$  1H), 3.74 (m, 0.83  $\times$  1H), 3.88–3.92 (m, 0.17  $\times$  2H), 5.27 (m, 0.17  $\times$  1H), 5.71 (dd,  $J = 8.8, 4.4$  Hz, 0.83  $\times$  1H), 7.20–7.23 (m, 0.17  $\times$  3H), 7.30–7.63 (m, 0.83  $\times$  1H + 7H), 8.05–8.07 (m, 0.83  $\times$  2H). Peaks for the minor rotamer were enclosed in parenthesis:  $^{13}\text{C NMR}$  (100.6 MHz,  $\text{CDCl}_3$ )  $\delta$  (22.4), 25.4, 29.4, (31.1), (46.7), 50.1, 61.3, (64.0), (126.5), 127.3, (128.0), 128.2, (128.3), 128.5, 128.6, (129.4), (129.8), 130.0, 133.3, (133.4), (134.2), 135.3, 136.3, (137.3), 169.2, (170.4), 197.7, (198.3). **HRMS–DART** ( $m/z$ ):  $[\text{M}+\text{H}]^+$  calcd for  $\text{C}_{18}\text{H}_{18}\text{NO}_2$ ; 280.1332, found 280.1333.

## 10. Effects of Reaction Components on Intermolecular Arylacylation of Styrenes

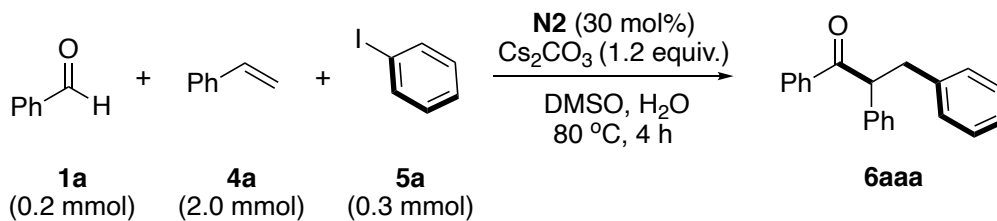

| entry | changes from standard conditions                             | $^1\text{H-NMR}$ yield of <b>6aaa</b> (%) |
|-------|--------------------------------------------------------------|-------------------------------------------|
| 1     | none                                                         | 50 (34) <sup>a</sup>                      |
| 2     | <b>N1</b> instead of <b>N2</b>                               | 30                                        |
| 3     | without $\text{H}_2\text{O}$                                 | 36                                        |
| 4     | $\text{Rb}_2\text{CO}_3$ instead of $\text{Cs}_2\text{CO}_3$ | 17                                        |
| 5     | TBD instead of $\text{Cs}_2\text{CO}_3$                      | 5                                         |
| 6     | MTBD instead of $\text{Cs}_2\text{CO}_3$                     | trace                                     |

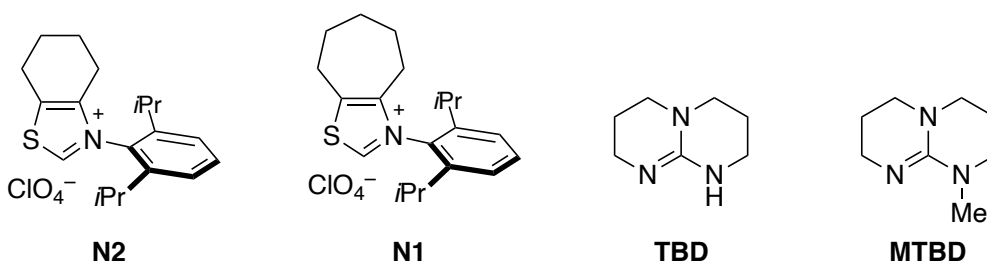

Supplementary Fig. 1 | Effects of Reaction Components. <sup>a</sup> isolated yield.

## 11. Effects of Reaction Components on C–H Acylation

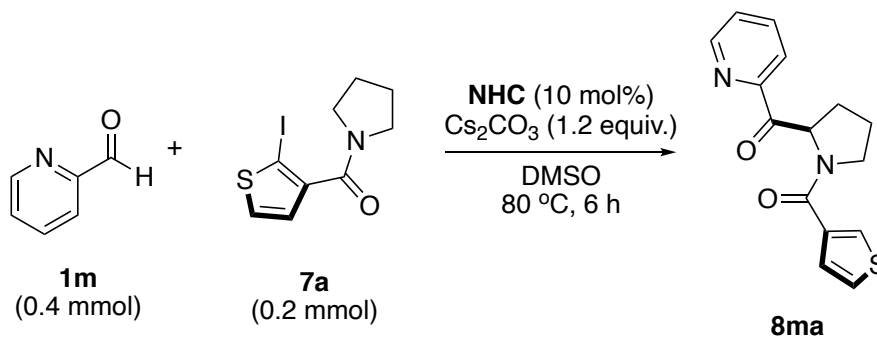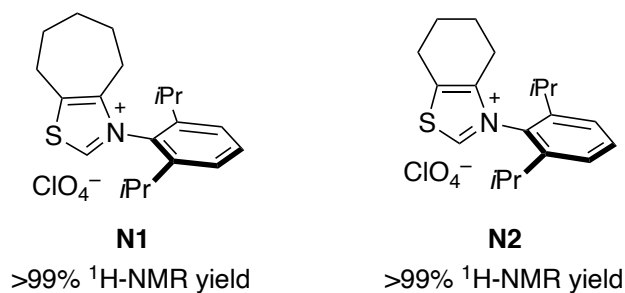

Supplementary Fig. 2 | Effects of NHC Catalysts.



## 12. Cyclic Voltammetry (CV) Experiments

CV measurements were carried out under nitrogen atmosphere in DMSO solutions with 0.1 M of tetrabutylammonium tetrafluoroborate ( $\text{Bu}_4\text{NBF}_4$ ) as a supporting electrolyte. Measurements were made with a glassy carbon electrode (area =  $0.07 \text{ cm}^2$ ), an Ag/AgCl reference electrode, and a Pt wire counter electrode. The concentration of the sample solution was fixed at 10 mM and the sweep rates were set to 100 mV/s.

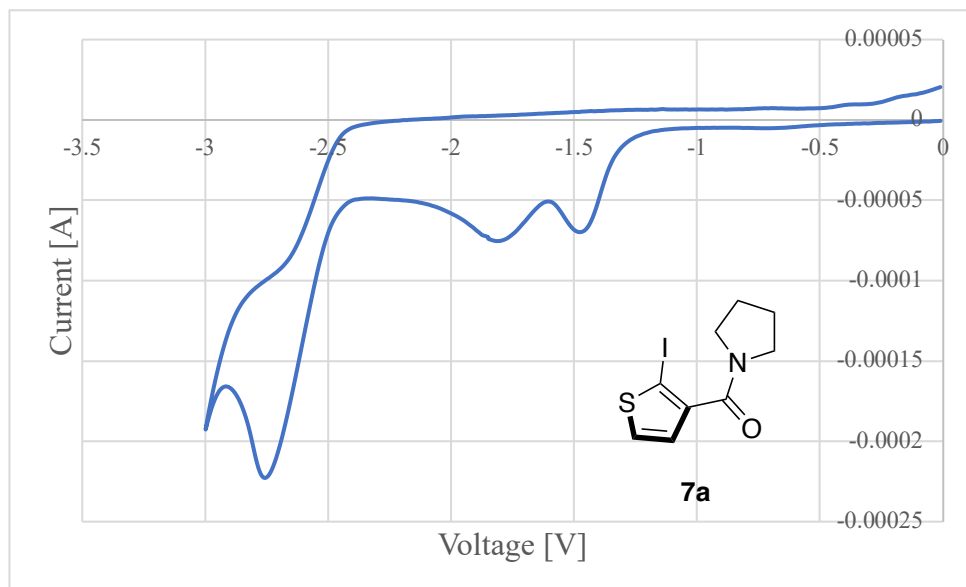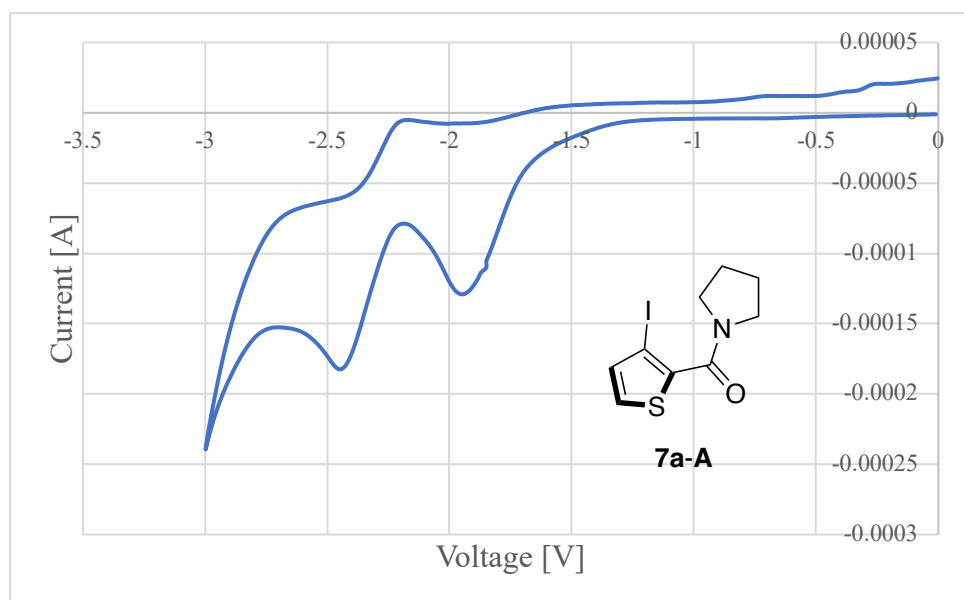

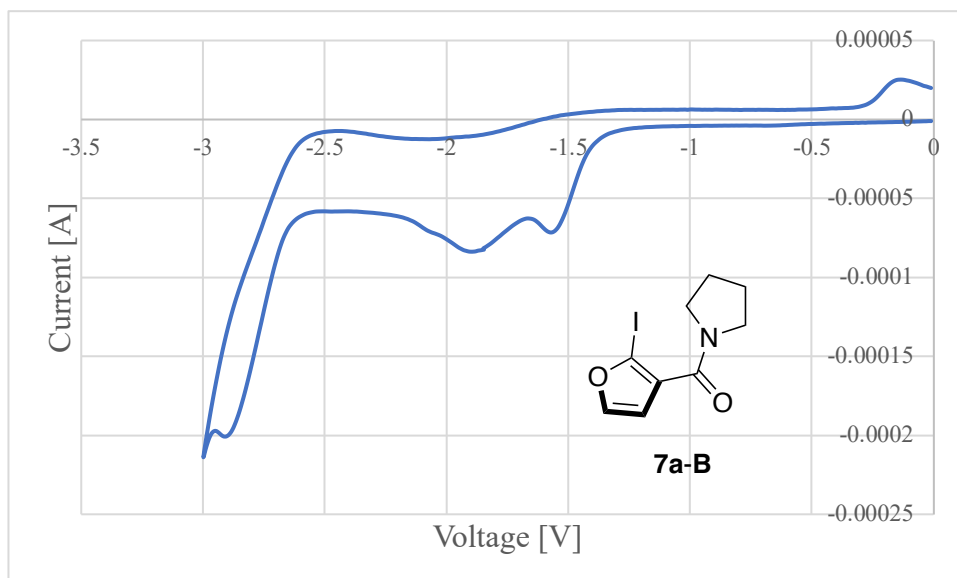

**Supplementary Fig. 5** | Cyclic voltammogram of **7a-B**. The compound is unstable under the measurement conditions.

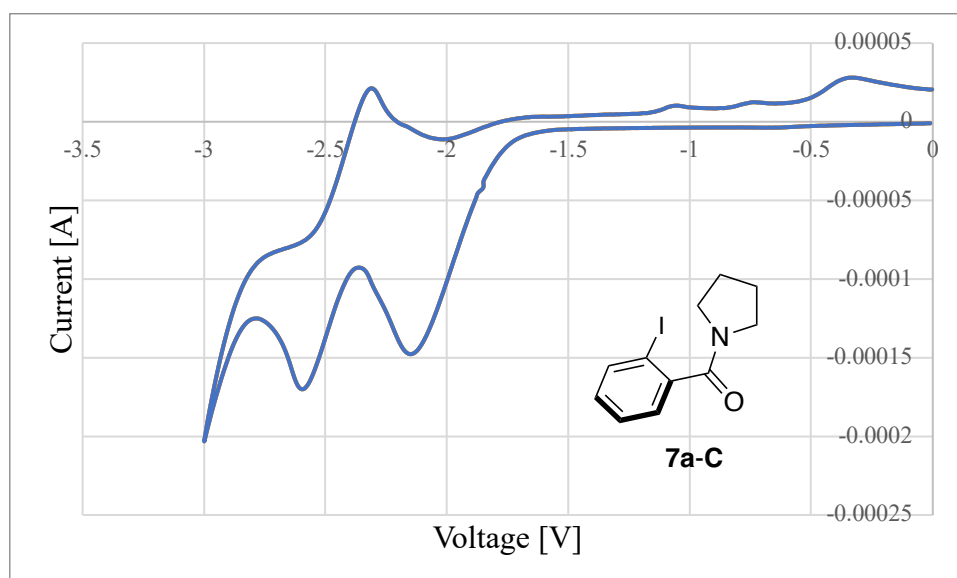

**Supplementary Fig. 6** | Cyclic voltammogram of **7a-C**. The compound is unstable under the measurement conditions.

### 13. Computational Studies

All calculations were carried out with Gaussian 09, Revision D.01.<sup>12</sup>

#### 13.1. Calculation of Bond Dissociation Energy (BDE)

The BDE values of C–I bonds in amide substrates **7a** and **7a-A-C** were calculated according to the following equation.

$$\text{BDE (C-I)} = \Delta H_{\text{Ar radical}} + \Delta H_{\text{I radical}} - \Delta H_{\text{Ar-I}}$$

The density functional theory (DFT) functional UB3LYP<sup>13</sup> was used with the 6-31+G\* basis set (I: LANL2DZ<sup>14</sup>) for geometry optimizations. We carried out vibrational frequency calculations with

6-311+G\* to obtain thermal corrections to enthalpies (H) at 298.15 K (25 °C).

| amide substrate                    |  |  |  |  |
|------------------------------------|-----------------------------------------------------------------------------------|-----------------------------------------------------------------------------------|-------------------------------------------------------------------------------------|-------------------------------------------------------------------------------------|
|                                    | 7a                                                                                | 7a-A                                                                              | 7a-B                                                                                | 7a-C                                                                                |
| $\Delta H_{Ar\ radical}$ (Hartree) | -877.009160                                                                       | -877.014250                                                                       | -554.017869                                                                         | -556.217618                                                                         |
| $\Delta H_{I\ radical}$ (Hartree)  | -11.360259                                                                        | -11.360259                                                                        | -11.360259                                                                          | -11.360259                                                                          |
| $\Delta H_{Ar-I}$ (Hartree)        | -888.468662                                                                       | -888.470684                                                                       | -565.480514                                                                         | -567.671583                                                                         |
| BDE (C-I) (kcal/mol)               | 62.3                                                                              | 60.4                                                                              | 64.2                                                                                | 58.8                                                                                |

Supplementary Fig. 7 | BDEs of C-I bonds

### Optimization structure of I radical

I                    -0.25990099    -0.24752475    0.00000000

### Optimization structure of 7a Ar radical

C                    3.37835900    0.52139100    -0.02334000  
 C                    2.21890000    1.23956400    -0.05559400  
 C                    1.02379000    0.42330400    -0.01305200  
 C                    1.38888100    -0.88758200    0.05105000  
 S                    3.07210200    -1.20716200    0.06335600  
 H                    4.39834200    0.88421200    -0.04455800  
 H                    2.15983500    2.32108200    -0.10665500  
 C                    -0.33137100    1.05477100    -0.02747100  
 O                    -0.43467600    2.28701600    -0.05265700  
 C                    -1.48664500    -1.21646700    -0.01375700  
 C                    -2.77230700    0.86416500    0.01777600  
 C                    -2.96556100    -1.51624900    -0.31393300  
 H                    -1.18821500    -1.62270500    0.96328700  
 H                    -0.81452100    -1.63290900    -0.77224600  
 C                    -3.70303000    -0.32048100    0.31201100  
 H                    -2.98780600    1.32850400    -0.95412800  
 H                    -2.80960300    1.65524900    0.77169300  
 H                    -3.12832000    -1.53551600    -1.39878400  
 H                    -3.27993200    -2.48350800    0.09061300  
 H                    -4.70682400    -0.17266500    -0.09840300  
 H                    -3.80163700    -0.46308000    1.39566300  
 N                    -1.43194900    0.25218800    -0.00586500

### Optimization structure of 7a

|   |             |             |             |
|---|-------------|-------------|-------------|
| C | -1.86078700 | 2.84512500  | 0.41996600  |
| C | -0.60802000 | 2.70798200  | -0.10891500 |
| C | -0.22142800 | 1.33978300  | -0.31293700 |
| C | -1.21996500 | 0.47324700  | 0.05903600  |
| S | -2.62413500 | 1.30601100  | 0.66264200  |
| H | -2.38424000 | 3.75748500  | 0.67597400  |
| H | 0.03754100  | 3.54175700  | -0.36316700 |
| C | 1.09042600  | 0.98848900  | -0.96453000 |
| O | 1.29849500  | 1.29663500  | -2.14118000 |
| C | 1.97369300  | 0.11885300  | 1.25245300  |
| C | 3.33115200  | 0.01184500  | -0.78357600 |
| C | 3.45478900  | -0.04554800 | 1.62725500  |
| H | 1.40960700  | -0.79705400 | 1.47211900  |
| H | 1.48708400  | 0.94979700  | 1.77034600  |
| C | 4.06318900  | -0.69170900 | 0.36963700  |
| H | 3.84591900  | 0.92618200  | -1.10677200 |
| H | 3.19578600  | -0.61604100 | -1.66932000 |
| H | 3.90874000  | 0.93760800  | 1.80526800  |
| H | 3.58801300  | -0.64710900 | 2.53210100  |
| H | 5.14905200  | -0.57055800 | 0.30561900  |
| H | 3.84536100  | -1.76710800 | 0.35667000  |
| N | 2.02270500  | 0.36114900  | -0.20151200 |
| I | -1.25777200 | -1.62265400 | -0.13568700 |

### Optimization structure of 7a-A Ar radical

|   |             |             |             |
|---|-------------|-------------|-------------|
| C | -3.49808100 | 0.59544100  | 0.02914200  |
| C | -1.06490600 | -0.02828300 | 0.00358700  |
| C | -1.33798200 | 1.30029800  | 0.07173900  |
| H | -4.58160600 | 0.57108800  | 0.02443800  |
| C | 0.16834900  | -0.85403200 | -0.02273900 |
| O | 0.08298600  | -2.08870900 | -0.05191800 |
| C | 1.63336400  | 1.22851500  | -0.01309400 |
| C | 2.61130600  | -1.01552300 | 0.00989600  |
| C | 3.14017100  | 1.31548600  | -0.30966600 |
| H | 1.39154800  | 1.67007000  | 0.96411400  |
| H | 1.02596400  | 1.73516500  | -0.77025800 |
| C | 3.70001400  | 0.02390500  | 0.31050000  |
| H | 2.75835300  | -1.49845400 | -0.96573400 |

|   |             |             |             |
|---|-------------|-------------|-------------|
| H | 2.53607500  | -1.80902500 | 0.75838000  |
| H | 3.30655700  | 1.31704200  | -1.39416600 |
| H | 3.58878700  | 2.22585000  | 0.10034000  |
| H | 4.67308300  | -0.26288600 | -0.10031500 |
| H | 3.81643600  | 0.14526800  | 1.39494700  |
| N | 1.37207300  | -0.21852500 | -0.00736700 |
| S | -2.60726900 | -0.88948600 | -0.04355500 |
| C | -2.68958300 | 1.70846400  | 0.08910700  |
| H | -3.04320100 | 2.73138900  | 0.14121700  |

### Optimization structure of 7a-A

|   |             |             |             |
|---|-------------|-------------|-------------|
| C | 2.23936800  | 2.49976500  | -0.72723800 |
| C | 0.28851200  | 1.24664700  | 0.21338100  |
| C | 1.33577700  | 0.44220000  | -0.15937700 |
| H | 2.90535100  | 3.27261200  | -1.08949400 |
| C | -1.00420500 | 0.92543800  | 0.91112000  |
| O | -1.20134700 | 1.30748100  | 2.06753800  |
| C | -1.90364200 | -0.09842300 | -1.23327900 |
| C | -3.21181500 | -0.13072200 | 0.83790900  |
| C | -3.38656800 | -0.33129500 | -1.56190000 |
| H | -1.31385400 | -1.00637700 | -1.41317900 |
| H | -1.45653200 | 0.71752900  | -1.80766100 |
| C | -3.94497800 | -0.92305900 | -0.25525100 |
| H | -3.74834800 | 0.78477900  | 1.11947500  |
| H | -3.03585600 | -0.70086200 | 1.75500200  |
| H | -3.87691600 | 0.62474100  | -1.78500300 |
| H | -3.51927800 | -0.98839800 | -2.42727600 |
| H | -5.03251800 | -0.83290600 | -0.17203200 |
| H | -3.69110100 | -1.98828300 | -0.18597500 |
| N | -1.92857800 | 0.22533300  | 0.20550900  |
| I | 1.40123800  | -1.66048100 | 0.12052200  |
| S | 0.68986400  | 2.92111700  | -0.08030300 |
| C | 2.45589600  | 1.14921000  | -0.69846100 |
| H | 3.36633700  | 0.66906800  | -1.03698700 |

### Optimization structure of 7a-B Ar radical

|   |            |             |             |
|---|------------|-------------|-------------|
| C | 3.58450500 | -0.14233500 | 0.02015900  |
| C | 2.65096800 | 0.84038300  | -0.02901300 |
| C | 1.34594600 | 0.20522400  | -0.00775500 |

|   |             |             |             |
|---|-------------|-------------|-------------|
| C | 1.65226400  | -1.12557900 | 0.05391100  |
| H | 4.66265800  | -0.17423200 | 0.02648500  |
| H | 2.81170500  | 1.90854500  | -0.07500800 |
| C | 0.06497800  | 0.95311600  | -0.03676100 |
| O | 0.07970700  | 2.18993400  | -0.07318800 |
| C | -1.28110900 | -1.20527600 | -0.00079500 |
| C | -2.38706300 | 0.97720100  | -0.00515300 |
| C | -2.78136800 | -1.38554900 | -0.28848900 |
| H | -1.00996700 | -1.62002900 | 0.98093400  |
| H | -0.65083000 | -1.68755300 | -0.75639500 |
| C | -3.41283000 | -0.11908900 | 0.31490700  |
| H | -2.56593700 | 1.43703400  | -0.98667800 |
| H | -2.35573800 | 1.78422100  | 0.73189300  |
| H | -2.95149700 | -1.41339900 | -1.37201000 |
| H | -3.17432800 | -2.31416200 | 0.13730400  |
| H | -4.40241400 | 0.10406000  | -0.09595900 |
| H | -3.51852600 | -0.23105400 | 1.40147800  |
| N | -1.10411600 | 0.25349700  | -0.01633400 |
| O | 2.95353500  | -1.38449500 | 0.07271700  |

### Optimization structure of 7a-B

|   |             |             |             |
|---|-------------|-------------|-------------|
| C | 1.76401900  | 2.76202800  | -0.77612700 |
| C | 0.49467700  | 2.83063100  | -0.29771700 |
| C | 0.12101300  | 1.49146700  | 0.08436400  |
| C | 1.22060700  | 0.72230000  | -0.18552000 |
| H | 2.45684600  | 3.48231600  | -1.18324200 |
| H | -0.12591900 | 3.71129700  | -0.20635800 |
| C | -1.16414600 | 1.14139300  | 0.76775100  |
| O | -1.48066100 | 1.71820800  | 1.81281100  |
| C | -1.84994200 | -0.36036800 | -1.16700700 |
| C | -3.24322800 | -0.14695100 | 0.83389000  |
| C | -3.29506500 | -0.76400300 | -1.49818300 |
| H | -1.19050300 | -1.23774700 | -1.17057400 |
| H | -1.43686000 | 0.37754700  | -1.86000700 |
| C | -3.86322200 | -1.17225000 | -0.12745600 |
| H | -3.86020200 | 0.75550800  | 0.93380300  |
| H | -3.06981000 | -0.53541700 | 1.84200100  |
| H | -3.84526400 | 0.09880000  | -1.89465800 |
| H | -3.34032400 | -1.56463200 | -2.24346200 |
| H | -4.95712900 | -1.16163900 | -0.09370300 |

|   |             |             |             |
|---|-------------|-------------|-------------|
| H | -3.53050600 | -2.18554300 | 0.13100200  |
| N | -1.96148600 | 0.20109200  | 0.19271700  |
| I | 1.68949700  | -1.27759000 | 0.18366600  |
| O | 2.22796900  | 1.47412600  | -0.70557100 |

### Optimization structure of 7a-C Ar radical

|   |             |             |             |
|---|-------------|-------------|-------------|
| C | 2.25201000  | 1.12162400  | -0.16420800 |
| C | 1.10967200  | 0.30989900  | 0.01355600  |
| H | 2.09557300  | 2.18845700  | -0.29694800 |
| C | -0.23567700 | 0.99144100  | 0.02442800  |
| O | -0.29933100 | 2.22661300  | 0.03729000  |
| C | -1.51720400 | -1.22349900 | -0.09303200 |
| C | -2.67461500 | 0.92292700  | 0.09165900  |
| C | -3.00678500 | -1.40365200 | -0.43255100 |
| H | -1.26406000 | -1.72165900 | 0.85291400  |
| H | -0.85913900 | -1.62271700 | -0.87024200 |
| C | -3.67821900 | -0.22135900 | 0.28466100  |
| H | -2.84911400 | 1.47339100  | -0.84267200 |
| H | -2.67494100 | 1.65527300  | 0.90371000  |
| H | -3.15436700 | -1.32147200 | -1.51680600 |
| H | -3.38565000 | -2.38028600 | -0.11460700 |
| H | -4.66682300 | 0.02114900  | -0.11764900 |
| H | -3.79661100 | -0.44520900 | 1.35256800  |
| N | -1.37041300 | 0.23683100  | 0.03112100  |
| C | 1.36203400  | -1.03590400 | 0.19739500  |
| C | 2.59831200  | -1.64472800 | 0.21614900  |
| C | 3.53043300  | 0.56513500  | -0.16086800 |
| C | 3.71302600  | -0.81092800 | 0.02841400  |
| H | 2.71649600  | -2.71438000 | 0.37044600  |
| H | 4.71371800  | -1.23754100 | 0.03321900  |
| H | 4.39452900  | 1.20853900  | -0.30371400 |

### Optimization structure of 7a-C

|   |             |            |             |
|---|-------------|------------|-------------|
| C | -0.65380300 | 2.65263700 | -0.33605500 |
| C | -0.40333200 | 1.27142300 | -0.38956300 |
| H | 0.09313400  | 3.33341000 | -0.73646000 |
| C | 0.88007000  | 0.81319000 | -1.04931700 |
| O | 0.98051200  | 0.81152600 | -2.27850800 |
| C | 1.92069100  | 0.48736100 | 1.24147300  |

|   |             |             |             |
|---|-------------|-------------|-------------|
| C | 3.17887400  | -0.01239300 | -0.80100100 |
| C | 3.41794700  | 0.38737700  | 1.57133500  |
| H | 1.36894800  | -0.37027300 | 1.65001700  |
| H | 1.45727500  | 1.40231200  | 1.62075500  |
| C | 3.97070200  | -0.48413100 | 0.42901700  |
| H | 3.67706500  | 0.81399200  | -1.32487400 |
| H | 2.99393200  | -0.80128700 | -1.53612400 |
| H | 3.87554900  | 1.38445300  | 1.54335300  |
| H | 3.59494200  | -0.03673500 | 2.56485600  |
| H | 5.05140600  | -0.37824200 | 0.29190300  |
| H | 3.76109000  | -1.54228500 | 0.62934500  |
| N | 1.90368000  | 0.45842200  | -0.23196000 |
| C | -1.38555400 | 0.40023100  | 0.09446900  |
| C | -2.58098700 | 0.88620500  | 0.63201200  |
| C | -1.83895500 | 3.15015500  | 0.20397300  |
| C | -2.80305900 | 2.26397600  | 0.69174500  |
| H | -3.33565700 | 0.19684800  | 0.99612100  |
| H | -3.73348600 | 2.63795600  | 1.11090100  |
| H | -2.01189000 | 4.22236700  | 0.23703200  |
| I | -1.13542900 | -1.72565800 | -0.01742600 |

### 13.2. Calculation of Gibbs Energy Barrier on $\alpha$ -Amino C(sp<sup>3</sup>)-H Abstraction Step ( $\Delta G^\ddagger_{C-H}$ )

The density functional theory (DFT) functional UB3LYP was used with the 6-31+G\* basis set for geometry optimizations. We carried out vibrational frequency calculations to obtain thermal corrections to enthalpies (H) at 298.15 K (25 °C). The solvation effect (DMSO) was evaluated with a conductor-like polarizable continuum model (CPCM).

| Gibbs Free Energy                    | 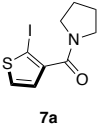 |  |  |  |
|--------------------------------------|-------------------------------------------------------------------------------------|-------------------------------------------------------------------------------------|---------------------------------------------------------------------------------------|---------------------------------------------------------------------------------------|
|                                      | 7a                                                                                  | 7a-A                                                                                | 7a-B                                                                                  | 7a-C                                                                                  |
| <b>Int</b> (Hartree)                 | -877.068852                                                                         | -877.074474                                                                         | -554.076419                                                                           | -556.277384                                                                           |
| <b>TS</b> (Hartree)                  | -877.062170                                                                         | -877.062470                                                                         | -554.066718                                                                           | -556.265990                                                                           |
| <b>Product</b> (Hartree)             | -877.109496                                                                         | -877.110386                                                                         | -554.120687                                                                           | -556.310006                                                                           |
| $\Delta G^\ddagger_{C-H}$ (kcal/mol) | 4.2                                                                                 | 7.5                                                                                 | 6.1                                                                                   | 7.2                                                                                   |

Supplementary Fig. 8. | Gibbs Energy Barrier on  $\alpha$ -Amino C(sp<sup>3</sup>)-H Abstraction Step

#### Optimization structure of Int-7a

|   |            |            |             |
|---|------------|------------|-------------|
| C | 3.37835900 | 0.52139100 | -0.02334000 |
| C | 2.21890000 | 1.23956400 | -0.05559400 |



|   |             |             |             |
|---|-------------|-------------|-------------|
| C | 1.02379000  | 0.42330400  | -0.01305200 |
| C | 1.38888100  | -0.88758200 | 0.05105000  |
| S | 3.07210200  | -1.20716200 | 0.06335600  |
| H | 4.39834200  | 0.88421200  | -0.04455800 |
| H | 2.15983500  | 2.32108200  | -0.10665500 |
| C | -0.33137100 | 1.05477100  | -0.02747100 |
| O | -0.43467600 | 2.28701600  | -0.05265700 |
| C | -1.48664500 | -1.21646700 | -0.01375700 |
| C | -2.77230700 | 0.86416500  | 0.01777600  |
| C | -2.96556100 | -1.51624900 | -0.31393300 |
| H | -1.18821500 | -1.62270500 | 0.96328700  |
| H | -0.81452100 | -1.63290900 | -0.77224600 |
| C | -3.70303000 | -0.32048100 | 0.31201100  |
| H | -2.98780600 | 1.32850400  | -0.95412800 |
| H | -2.80960300 | 1.65524900  | 0.77169300  |
| H | -3.12832000 | -1.53551600 | -1.39878400 |
| H | -3.27993200 | -2.48350800 | 0.09061300  |
| H | -4.70682400 | -0.17266500 | -0.09840300 |
| H | -3.80163700 | -0.46308000 | 1.39566300  |
| N | -1.43194900 | 0.25218800  | -0.00586500 |

### Optimization structure of TS-7a

|   |             |             |             |
|---|-------------|-------------|-------------|
| C | 3.31467100  | 0.40436000  | -0.06239500 |
| C | 2.24770900  | 1.25368400  | 0.02152100  |
| C | 0.99300400  | 0.55404800  | 0.07797700  |
| C | 1.15397100  | -0.80585000 | -0.00386600 |
| S | 2.80846500  | -1.27529100 | -0.09390800 |
| H | 4.36655800  | 0.65339100  | -0.13106900 |
| H | 2.32105600  | 2.33530100  | 0.04034900  |
| C | -0.33880800 | 1.21321200  | 0.10807700  |
| O | -0.49162300 | 2.42048400  | -0.07732700 |
| C | -1.32678800 | -1.05438200 | 0.48887300  |
| C | -2.76060200 | 0.77762800  | -0.18447300 |
| C | -2.52370400 | -1.64701700 | -0.24234800 |
| H | -1.24339600 | -1.32687800 | 1.54969300  |
| H | -0.18716200 | -1.37589900 | 0.07858100  |
| C | -3.58027000 | -0.52544000 | -0.11017100 |
| H | -2.69156200 | 1.17637900  | -1.20430600 |
| H | -3.15470000 | 1.57385700  | 0.45392500  |
| H | -2.27432500 | -1.81201400 | -1.29874000 |

|   |             |             |             |
|---|-------------|-------------|-------------|
| H | -2.84919500 | -2.60134500 | 0.18198200  |
| H | -4.34834500 | -0.57258900 | -0.88828100 |
| H | -4.08381300 | -0.60143800 | 0.86098800  |
| N | -1.41895300 | 0.36722200  | 0.27412200  |

### Optimization structure of Product-7a

|   |             |             |             |
|---|-------------|-------------|-------------|
| C | 3.31113300  | 0.51709800  | 0.44635600  |
| C | 2.11821700  | 1.17953300  | 0.47825200  |
| C | 1.02063900  | 0.38579000  | -0.00324200 |
| C | 1.43215300  | -0.86744500 | -0.40359300 |
| S | 3.13509600  | -1.08780700 | -0.19755200 |
| H | 4.28407000  | 0.87268900  | 0.75963200  |
| H | 1.99183800  | 2.20017500  | 0.81913700  |
| H | 0.84308500  | -1.65519800 | -0.85216900 |
| C | -0.33365500 | 0.99484000  | -0.12742100 |
| O | -0.45380500 | 2.21762600  | -0.28418900 |
| C | -1.58348500 | -1.15769500 | 0.23194900  |
| C | -2.78433100 | 0.79404400  | -0.34142700 |
| C | -3.02471400 | -1.56620700 | 0.19080600  |
| C | -3.77014800 | -0.21174100 | 0.27166400  |
| H | -2.91032200 | 0.89816400  | -1.42670200 |
| H | -2.82488800 | 1.79151700  | 0.09744500  |
| H | -3.27236900 | -2.08833300 | -0.74905200 |
| H | -3.29149000 | -2.24919800 | 1.00618100  |
| H | -4.73157700 | -0.21641100 | -0.25062100 |
| H | -3.95688300 | 0.04594500  | 1.32064600  |
| N | -1.45725100 | 0.19090200  | -0.06774000 |
| H | -0.77665600 | -1.68106500 | 0.72395900  |

### Optimization structure of Int-7a-A

|   |             |             |             |
|---|-------------|-------------|-------------|
| C | -3.49808100 | 0.59544100  | 0.02914200  |
| C | -1.06490600 | -0.02828300 | 0.00358700  |
| C | -1.33798200 | 1.30029800  | 0.07173900  |
| H | -4.58160600 | 0.57108800  | 0.02443800  |
| C | 0.16834900  | -0.85403200 | -0.02273900 |
| O | 0.08298600  | -2.08870900 | -0.05191800 |
| C | 1.63336400  | 1.22851500  | -0.01309400 |
| C | 2.61130600  | -1.01552300 | 0.00989600  |
| C | 3.14017100  | 1.31548600  | -0.30966600 |

|   |             |             |             |
|---|-------------|-------------|-------------|
| H | 1.39154800  | 1.67007000  | 0.96411400  |
| H | 1.02596400  | 1.73516500  | -0.77025800 |
| C | 3.70001400  | 0.02390500  | 0.31050000  |
| H | 2.75835300  | -1.49845400 | -0.96573400 |
| H | 2.53607500  | -1.80902500 | 0.75838000  |
| H | 3.30655700  | 1.31704200  | -1.39416600 |
| H | 3.58878700  | 2.22585000  | 0.10034000  |
| H | 4.67308300  | -0.26288600 | -0.10031500 |
| H | 3.81643600  | 0.14526800  | 1.39494700  |
| N | 1.37207300  | -0.21852500 | -0.00736700 |
| S | -2.60726900 | -0.88948600 | -0.04355500 |
| C | -2.68958300 | 1.70846400  | 0.08910700  |
| H | -3.04320100 | 2.73138900  | 0.14121700  |

### Optimization structure of TS-7a-A

|   |             |             |             |
|---|-------------|-------------|-------------|
| C | 3.30234100  | -0.78991500 | -0.12731600 |
| C | 1.03069000  | 0.18062000  | 0.08642900  |
| C | 1.04143700  | -1.18413800 | 0.00956900  |
| H | 4.37378500  | -0.92939600 | -0.21305000 |
| C | -0.16812600 | 1.04294000  | 0.12233900  |
| O | -0.13437800 | 2.26177400  | -0.05211500 |
| C | -1.47150500 | -1.06655100 | 0.48274200  |
| C | -2.62496400 | 0.96469100  | -0.16623900 |
| C | -2.72906300 | -1.46950600 | -0.27230300 |
| H | -1.44589400 | -1.35811700 | 1.54139300  |
| H | -0.34984500 | -1.53735500 | 0.08594200  |
| C | -3.61959900 | -0.21269400 | -0.12780800 |
| H | -2.49395600 | 1.37518900  | -1.17515900 |
| H | -2.90957700 | 1.79175600  | 0.49105900  |
| H | -2.49292000 | -1.64776600 | -1.32986000 |
| H | -3.19240900 | -2.37587800 | 0.12867400  |
| H | -4.37653100 | -0.13565800 | -0.91458600 |
| H | -4.14159500 | -0.23638900 | 0.83622800  |
| N | -1.35623300 | 0.35908900  | 0.28526000  |
| S | 2.65661300  | 0.81741500  | -0.01948000 |
| C | 2.33098600  | -1.76620200 | -0.09943900 |
| H | 2.53860000  | -2.82830600 | -0.16669500 |

### Optimization structure of Product-7a-A

|   |             |             |             |
|---|-------------|-------------|-------------|
| C | 3.50216100  | 0.50372900  | -0.12748500 |
| C | 1.07543700  | -0.01692000 | 0.08346500  |
| C | 1.37942200  | 1.29579600  | 0.39247100  |
| H | 4.56914000  | 0.45412000  | -0.30511900 |
| C | -0.17260200 | -0.80563100 | 0.15108300  |
| O | -0.13315600 | -2.03987500 | 0.27041400  |
| C | -1.69531900 | 1.16108800  | -0.22004600 |
| C | -2.62985200 | -0.93578300 | 0.33089000  |
| C | -3.17704500 | 1.37767400  | -0.18201500 |
| H | -0.96029500 | 1.79482400  | -0.69328900 |
| H | 0.64633000  | 2.01613500  | 0.73465900  |
| C | -3.73731800 | -0.06232300 | -0.27746700 |
| H | -2.74723000 | -1.07155600 | 1.41349700  |
| H | -2.53217400 | -1.92271100 | -0.12224800 |
| H | -3.49335800 | 1.85489800  | 0.76115200  |
| H | -3.52765000 | 2.02697600  | -0.99302500 |
| H | -4.69210600 | -0.18882400 | 0.24156900  |
| H | -3.88613900 | -0.33263800 | -1.32923700 |
| N | -1.39287200 | -0.15553400 | 0.07785400  |
| S | 2.52344400  | -0.90304800 | -0.33989600 |
| C | 2.76645900  | 1.59205500  | 0.27301600  |
| H | 3.19567900  | 2.56716400  | 0.47861300  |

### Optimization structure of Int-7a-B

|   |             |             |             |
|---|-------------|-------------|-------------|
| C | 3.58450500  | -0.14233500 | 0.02015900  |
| C | 2.65096800  | 0.84038300  | -0.02901300 |
| C | 1.34594600  | 0.20522400  | -0.00775500 |
| C | 1.65226400  | -1.12557900 | 0.05391100  |
| H | 4.66265800  | -0.17423200 | 0.02648500  |
| H | 2.81170500  | 1.90854500  | -0.07500800 |
| C | 0.06497800  | 0.95311600  | -0.03676100 |
| O | 0.07970700  | 2.18993400  | -0.07318800 |
| C | -1.28110900 | -1.20527600 | -0.00079500 |
| C | -2.38706300 | 0.97720100  | -0.00515300 |
| C | -2.78136800 | -1.38554900 | -0.28848900 |
| H | -1.00996700 | -1.62002900 | 0.98093400  |
| H | -0.65083000 | -1.68755300 | -0.75639500 |
| C | -3.41283000 | -0.11908900 | 0.31490700  |
| H | -2.56593700 | 1.43703400  | -0.98667800 |
| H | -2.35573800 | 1.78422100  | 0.73189300  |

|   |             |             |             |
|---|-------------|-------------|-------------|
| H | -2.95149700 | -1.41339900 | -1.37201000 |
| H | -3.17432800 | -2.31416200 | 0.13730400  |
| H | -4.40241400 | 0.10406000  | -0.09595900 |
| H | -3.51852600 | -0.23105400 | 1.40147800  |
| N | -1.10411600 | 0.25349700  | -0.01633400 |
| O | 2.95353500  | -1.38449500 | 0.07271700  |

### Optimization structure of TS-7a-B

|   |             |             |             |
|---|-------------|-------------|-------------|
| C | 3.43404500  | -0.33453100 | -0.11286800 |
| C | 2.68325600  | 0.79201500  | 0.01085100  |
| C | 1.31419000  | 0.34894200  | 0.08308100  |
| C | 1.35511600  | -1.01512300 | -0.03952500 |
| H | 4.49178000  | -0.52721100 | -0.21060100 |
| H | 3.03492600  | 1.81380100  | 0.04550800  |
| C | 0.06683200  | 1.13231800  | 0.12158500  |
| O | 0.01766800  | 2.35117200  | -0.03881100 |
| C | -1.12056200 | -1.04816700 | 0.47713000  |
| C | -2.38227400 | 0.90060400  | -0.21281000 |
| C | -2.38412100 | -1.53383500 | -0.21908200 |
| H | -1.02301100 | -1.32827200 | 1.53456700  |
| H | -0.01223200 | -1.48995600 | 0.03565300  |
| C | -3.32447500 | -0.31216800 | -0.09882900 |
| H | -2.27842800 | 1.25888600  | -1.24517700 |
| H | -2.69238900 | 1.75100500  | 0.40099900  |
| H | -2.17200800 | -1.74676500 | -1.27518200 |
| H | -2.79296500 | -2.44241100 | 0.23255300  |
| H | -4.10485400 | -0.30088500 | -0.86592800 |
| H | -3.81789000 | -0.31694900 | 0.88045600  |
| N | -1.08725300 | 0.37382500  | 0.25979700  |
| O | 2.62305600  | -1.45971400 | -0.13726700 |

### Optimization structure of Product-7a-B

|   |             |             |             |
|---|-------------|-------------|-------------|
| C | -3.55794200 | -0.07563100 | -0.22272300 |
| C | -2.57410900 | 0.84987300  | -0.34876100 |
| C | -1.34090600 | 0.18852200  | 0.00271600  |
| C | -1.69381000 | -1.09832400 | 0.32549500  |
| H | -4.62574600 | -0.06327500 | -0.37886700 |
| H | -2.67061300 | 1.88465200  | -0.64374400 |
| C | -0.04997100 | 0.91213700  | 0.07175900  |

|   |             |             |             |
|---|-------------|-------------|-------------|
| O | -0.03118000 | 2.14789800  | 0.15273600  |
| C | 1.36308500  | -1.15246000 | -0.14448800 |
| C | 2.41139300  | 0.92454700  | 0.27010500  |
| C | 2.83137800  | -1.44630600 | -0.07239500 |
| H | 0.60886700  | -1.76383900 | -0.61921000 |
| H | -1.15144700 | -1.95359100 | 0.69526100  |
| C | 3.47314700  | -0.04993600 | -0.26189500 |
| H | 2.52437700  | 1.12557900  | 1.34307100  |
| H | 2.37801300  | 1.88354200  | -0.24817000 |
| H | 3.11117100  | -1.87072800 | 0.90653000  |
| H | 3.15340600  | -2.17029900 | -0.83018500 |
| H | 4.42957200  | 0.05927900  | 0.25812500  |
| H | 3.64527100  | 0.13664000  | -1.32829600 |
| N | 1.13637400  | 0.20126300  | 0.04768500  |
| O | -3.03520600 | -1.27181500 | 0.19636500  |

### Optimization structure of Int-7a-C

|   |             |             |             |
|---|-------------|-------------|-------------|
| C | 2.25201000  | 1.12162400  | -0.16420800 |
| C | 1.10967200  | 0.30989900  | 0.01355600  |
| H | 2.09557300  | 2.18845700  | -0.29694800 |
| C | -0.23567700 | 0.99144100  | 0.02442800  |
| O | -0.29933100 | 2.22661300  | 0.03729000  |
| C | -1.51720400 | -1.22349900 | -0.09303200 |
| C | -2.67461500 | 0.92292700  | 0.09165900  |
| C | -3.00678500 | -1.40365200 | -0.43255100 |
| H | -1.26406000 | -1.72165900 | 0.85291400  |
| H | -0.85913900 | -1.62271700 | -0.87024200 |
| C | -3.67821900 | -0.22135900 | 0.28466100  |
| H | -2.84911400 | 1.47339100  | -0.84267200 |
| H | -2.67494100 | 1.65527300  | 0.90371000  |
| H | -3.15436700 | -1.32147200 | -1.51680600 |
| H | -3.38565000 | -2.38028600 | -0.11460700 |
| H | -4.66682300 | 0.02114900  | -0.11764900 |
| H | -3.79661100 | -0.44520900 | 1.35256800  |
| N | -1.37041300 | 0.23683100  | 0.03112100  |
| C | 1.36203400  | -1.03590400 | 0.19739500  |
| C | 2.59831200  | -1.64472800 | 0.21614900  |
| C | 3.53043300  | 0.56513500  | -0.16086800 |
| C | 3.71302600  | -0.81092800 | 0.02841400  |
| H | 2.71649600  | -2.71438000 | 0.37044600  |

|   |            |             |             |
|---|------------|-------------|-------------|
| H | 4.71371800 | -1.23754100 | 0.03321900  |
| H | 4.39452900 | 1.20853900  | -0.30371400 |

### Optimization structure of TS-7a-C

|   |             |             |             |
|---|-------------|-------------|-------------|
| C | 2.26558200  | 1.14669400  | 0.02460000  |
| C | 1.06707700  | 0.41475400  | 0.06761100  |
| H | 2.21741800  | 2.23160600  | 0.05190100  |
| C | -0.25147000 | 1.13590000  | 0.09368200  |
| O | -0.33739200 | 2.34971600  | -0.10310300 |
| C | -1.37584100 | -1.07195600 | 0.48469900  |
| C | -2.69832000 | 0.86563300  | -0.12257100 |
| C | -2.58839200 | -1.56985000 | -0.28587800 |
| H | -1.35564700 | -1.35166100 | 1.54699800  |
| H | -0.20714800 | -1.42900500 | 0.10171000  |
| C | -3.58568000 | -0.39736600 | -0.12153500 |
| H | -2.62338000 | 1.33276700  | -1.11167300 |
| H | -3.04373500 | 1.63350100  | 0.57687900  |
| H | -2.33318100 | -1.70643200 | -1.34527900 |
| H | -2.97408900 | -2.51998800 | 0.09586200  |
| H | -4.34054000 | -0.36749200 | -0.91366000 |
| H | -4.11218700 | -0.49075800 | 0.83576200  |
| N | -1.36938100 | 0.35937100  | 0.27564800  |
| C | 1.13535300  | -0.97221900 | 0.00228300  |
| C | 2.32992100  | -1.67130700 | -0.07798500 |
| C | 3.48346100  | 0.47025100  | -0.05393000 |
| C | 3.52078400  | -0.93003100 | -0.10601900 |
| H | 2.35381300  | -2.75751700 | -0.12550300 |
| H | 4.47650700  | -1.44591400 | -0.17021600 |
| H | 4.41212300  | 1.03455000  | -0.07724200 |

### Optimization structure of Product-7a-C

|   |             |             |             |
|---|-------------|-------------|-------------|
| C | 2.09305400  | 1.03723200  | 0.57767200  |
| C | 1.09319900  | 0.30989100  | -0.08767000 |
| H | 1.84468300  | 2.00987100  | 0.99143500  |
| C | -0.25204400 | 0.95696100  | -0.23630800 |
| O | -0.34986300 | 2.16694400  | -0.47933900 |
| C | -1.53047500 | -1.12776300 | 0.34205200  |
| C | -2.71350000 | 0.78780200  | -0.36579300 |
| C | -2.97452100 | -1.51883200 | 0.36277500  |

|   |             |             |             |
|---|-------------|-------------|-------------|
| H | -0.69351300 | -1.66400200 | 0.76217200  |
| H | 0.66842300  | -1.48430300 | -1.21834700 |
| C | -3.69679900 | -0.14953200 | 0.35252200  |
| H | -2.87333700 | 0.81234200  | -1.45122600 |
| H | -2.72323300 | 1.81633200  | -0.00296900 |
| H | -3.25322100 | -2.11009100 | -0.52720500 |
| H | -3.23340600 | -2.13036400 | 1.23560800  |
| H | -4.67206600 | -0.17987300 | -0.14259900 |
| H | -3.85123100 | 0.19442400  | 1.38176200  |
| N | -1.38778600 | 0.18263000  | -0.09117900 |
| C | 1.42055400  | -0.92498400 | -0.66931200 |
| C | 2.72034900  | -1.42811800 | -0.57375600 |
| C | 3.38434000  | 0.52261900  | 0.69231900  |
| C | 3.70209500  | -0.71206300 | 0.11667600  |
| H | 2.96593600  | -2.37778700 | -1.04248800 |
| H | 4.71085000  | -1.10902800 | 0.19784800  |
| H | 4.14601700  | 1.08923600  | 1.22191600  |



## 14. Deprotection of Directing Group

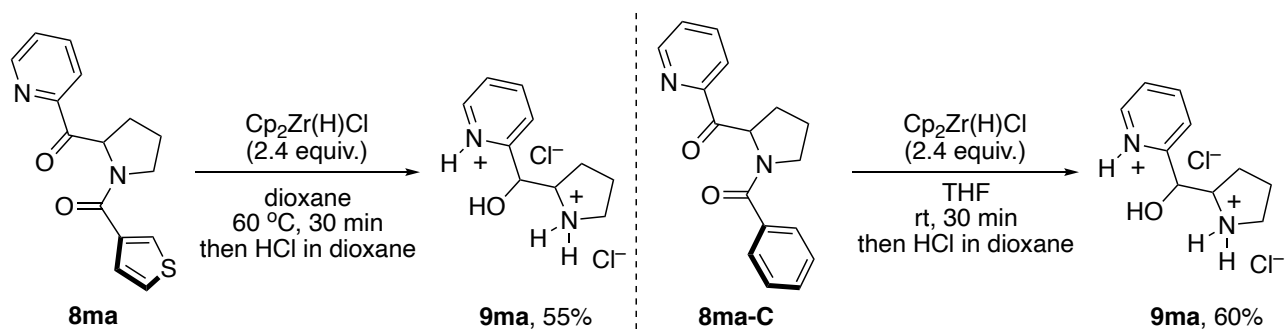

Supplementary Fig. 9 | Deprotection of Directing Group

**Deprotection of 8ma.** The deprotection is conducted by the reported procedure.<sup>15</sup>  $\text{Cp}_2\text{Zr}(\text{H})\text{Cl}$  (61.9 mg, 0.24 mmol) was suspended in dioxane (830  $\mu\text{L}$ ) under nitrogen at room temperature in a flame-dried round bottom flask. To this suspension was added **8ma** (28.6 mg, 0.1 mmol) in dioxane (500  $\mu\text{L}$ ) also at room temperature. After stirring at  $60\text{ }^\circ\text{C}$  for 30 min, ethanol was added to the reaction mixture, stirring for 5 min. After filtration with Celite, the filtrate solution was concentrated. The volatiles were dissolved in DCM and acidified to pH 1–2 with 10% HCl aqueous solution. The water layer was washed with DCM (twice) and then basified to pH 9–10 with NaOH aqueous solution. The water layer was extracted with DCM (3 times) and the combined organic layer was dried over sodium sulfate. After filtration, the resulting solution was evaporated under reduced pressure. After the volatiles were treated with HCl in dioxane, the product **9ma** (13.7 mg, 0.055 mmol, 55% isolated yield) was purified by recrystallization from AcEt/EtOH.

**Deprotection of 8ma-C.** The deprotection is conducted by the reported procedure.<sup>15</sup>  $\text{Cp}_2\text{Zr}(\text{H})\text{Cl}$  (61.9 mg, 0.24 mmol) was suspended in THF (830  $\mu\text{L}$ ) under nitrogen at room temperature in a flame-dried round bottom flask. To this suspension was added **8ma-C** (28.0 mg, 0.1 mmol) in THF (500  $\mu\text{L}$ ) also at room temperature. After stirring for 30 min, ethanol was added to the reaction mixture, stirring for 5 min. After filtration with Celite, the filtrate solution was concentrated. The volatiles were dissolved in DCM and acidified to pH 1–2 with 10% HCl aqueous solution. The water layer was washed with DCM (twice) and then basified to pH 9–10 with NaOH aqueous solution. The water layer was extracted with DCM (3 times) and the combined organic layer was dried over sodium sulfate. After filtration, the resulting solution was evaporated under reduced pressure. After the volatiles were treated with HCl in dioxane, the product **9ma** (15.0 mg, 0.060 mmol, 60%) was purified by recrystallization from AcEt/EtOH.

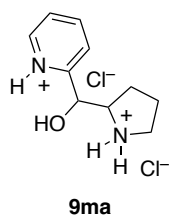

Off-white solid. **M.p.** 194–197 °C. **IR** (neat) 772, 972, 1087, 1120, 1457, 1612, 2070, 2216, 2476, 3356  $\text{cm}^{-1}$ .  **$^1\text{H}$  NMR** (400 MHz,  $\text{CD}_3\text{OD}$ )  $\delta$  1.72–2.14 (m, 4H), 3.40–3.41 (m, 2H), 4.17 (m, 1H), 5.68 (m, 1H), 8.09 (m, 1H), 8.24 (m, 1H), 8.67 (m, 1H), 8.86 (m, 1H).  **$^{13}\text{C}$  NMR** (100.6 MHz,  $\text{CD}_3\text{OD}$ )  $\delta$  24.1, 24.8, 47.6, 63.8, 68.5, 126.4, 128.1, 143.3, 148.4, 155.8. **HRMS–ESI** ( $m/z$ ):  $[\text{M}+\text{H}-2\text{HCl}]^+$  calcd for  $\text{C}_{10}\text{H}_{15}\text{N}_2\text{O}$ , 179.1179; found, 179.1183.

## 15. UV-Vis Absorption Measurement

### Procedure for Supplementary Fig. 10.

Preparation of 0.8 mM DMSO solution of **10a** (solution A).

Under nitrogen atmosphere, thiazolium salt **10a** (3.8 mg, 8  $\mu\text{mol}$ ) was dissolved in degassed DMSO (1 mL). Then, 200  $\mu\text{L}$  of the solution added to the quartz cuvette sealed with a silicon-based septum and diluted with degassed DMSO (1.8 mL) to make 0.8 mM solution of **10a**.

Preparation of 0.32 M DMSO solution of DBU (solution B).

Under nitrogen atmosphere, DBU (4.8  $\mu\text{L}$ , 32  $\mu\text{mol}$ ) was dissolved in degassed DMSO (100  $\mu\text{L}$ ).

Preparation of 0.16 M DMSO solution of iodobenzene (solution C).

Under nitrogen atmosphere, iodobenzene (3.6  $\mu\text{L}$ , 32  $\mu\text{mol}$ ) was dissolved in degassed DMSO (200  $\mu\text{L}$ ).

First, the solution A including thiazolium salt **10a**<sup>16</sup> was measured (Supplementary Fig. 10, yellow line). Then, TBAF (1.6  $\mu\text{L}$ , 1.6  $\mu\text{mol}$ , 1.0 M THF solution) was added to the solution A, and the resulting solution was measured (Supplementary Fig. 10, green line). Subsequently, 10  $\mu\text{L}$  of solution B including DBU was added: the UV-Vis spectrum showed an absorption at  $\lambda_{\text{max}} = 380 \text{ nm}$ , consistent with the formation of the enolate form of Breslow intermediate **10a-B** (Supplementary Fig. 10, red line)<sup>17,18</sup> Finally, 10  $\mu\text{L}$  of solution C including iodobenzene was added: the significant shift of the absorption was not observed (Supplementary Fig. 10, blue line).

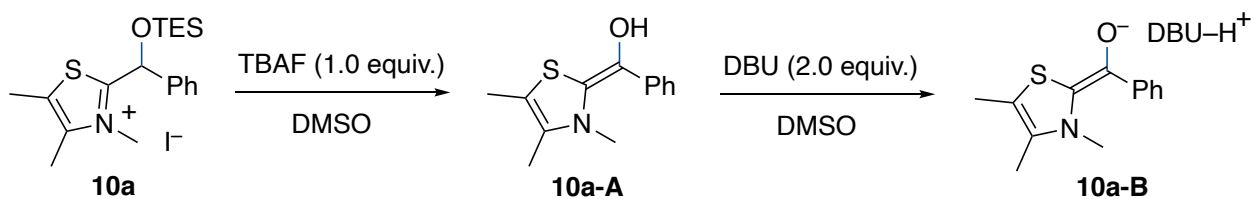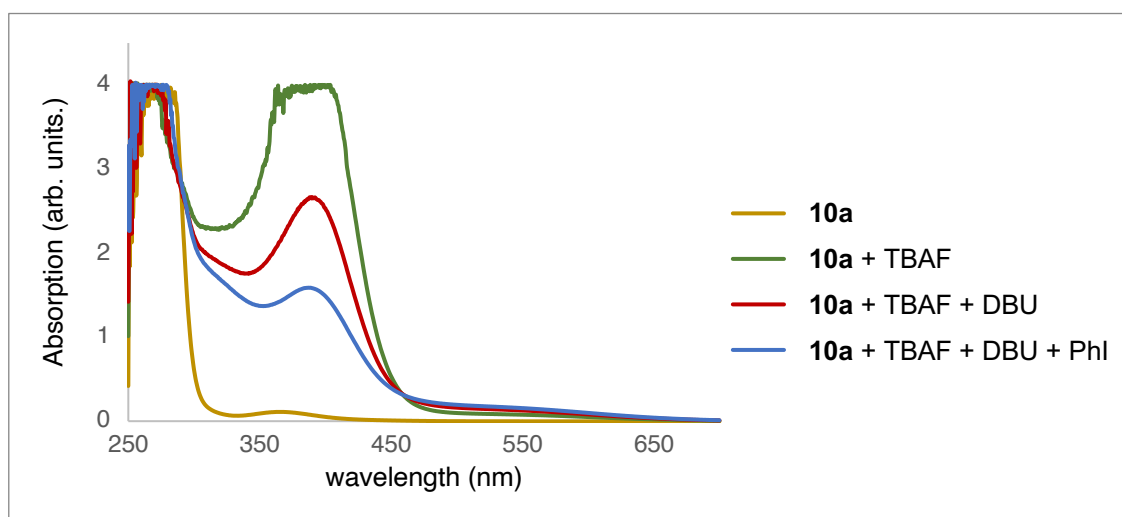

Supplementary Fig. 10 | UV-Vis spectrum of **10a**

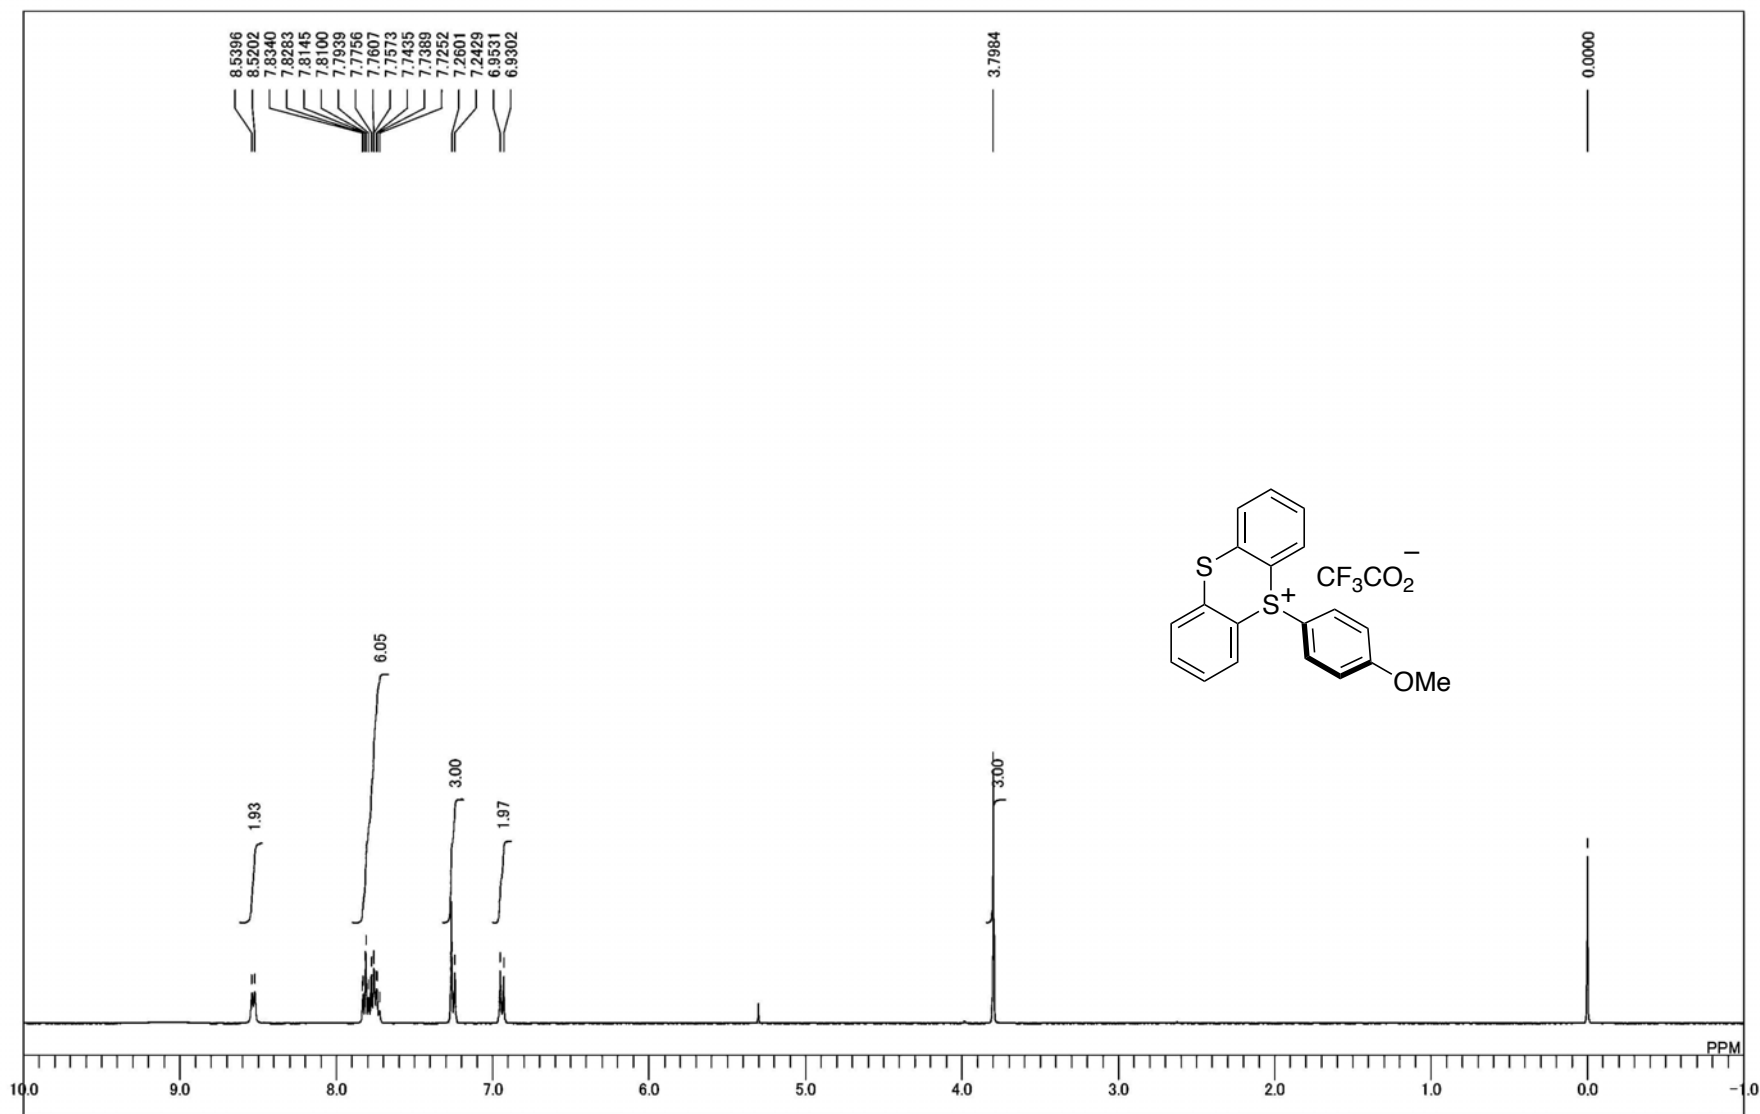

Supplementary Fig. 11 | <sup>1</sup>H NMR spectrum of 5b-S

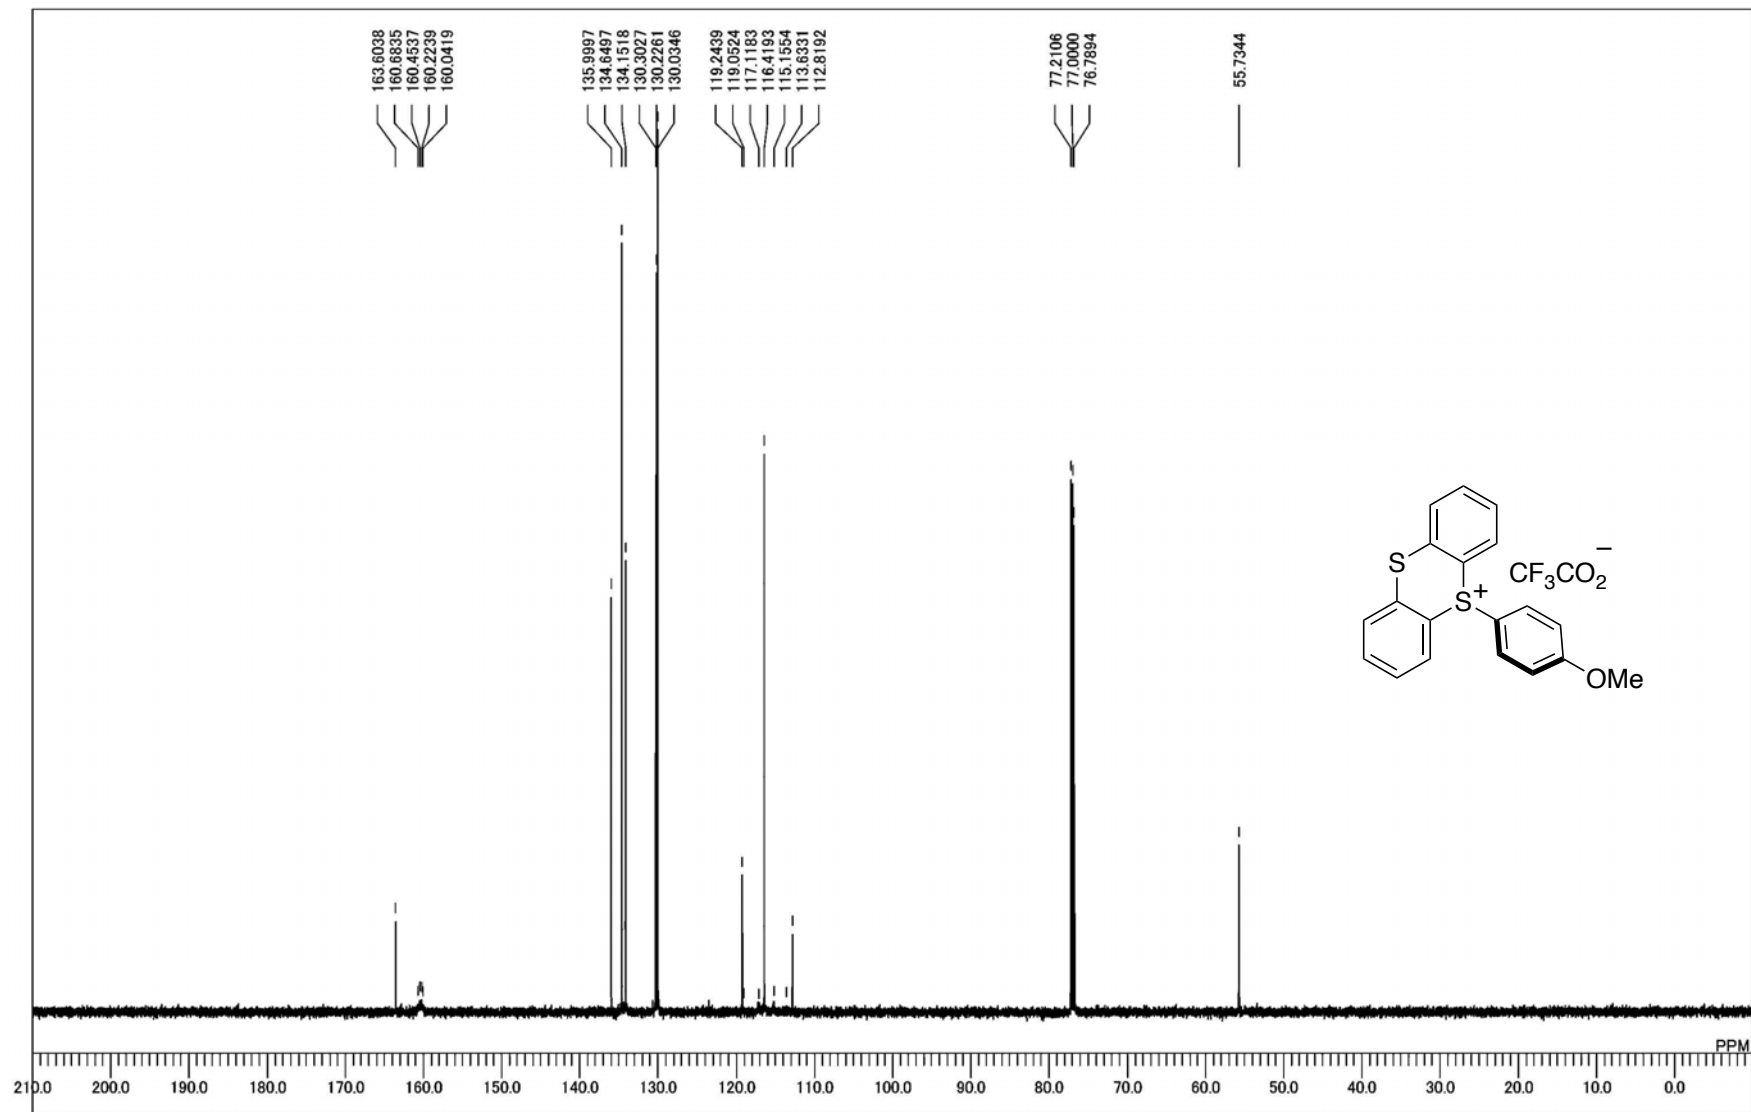

Supplementary Fig. 12 | <sup>13</sup>C NMR spectrum of **5b-S**

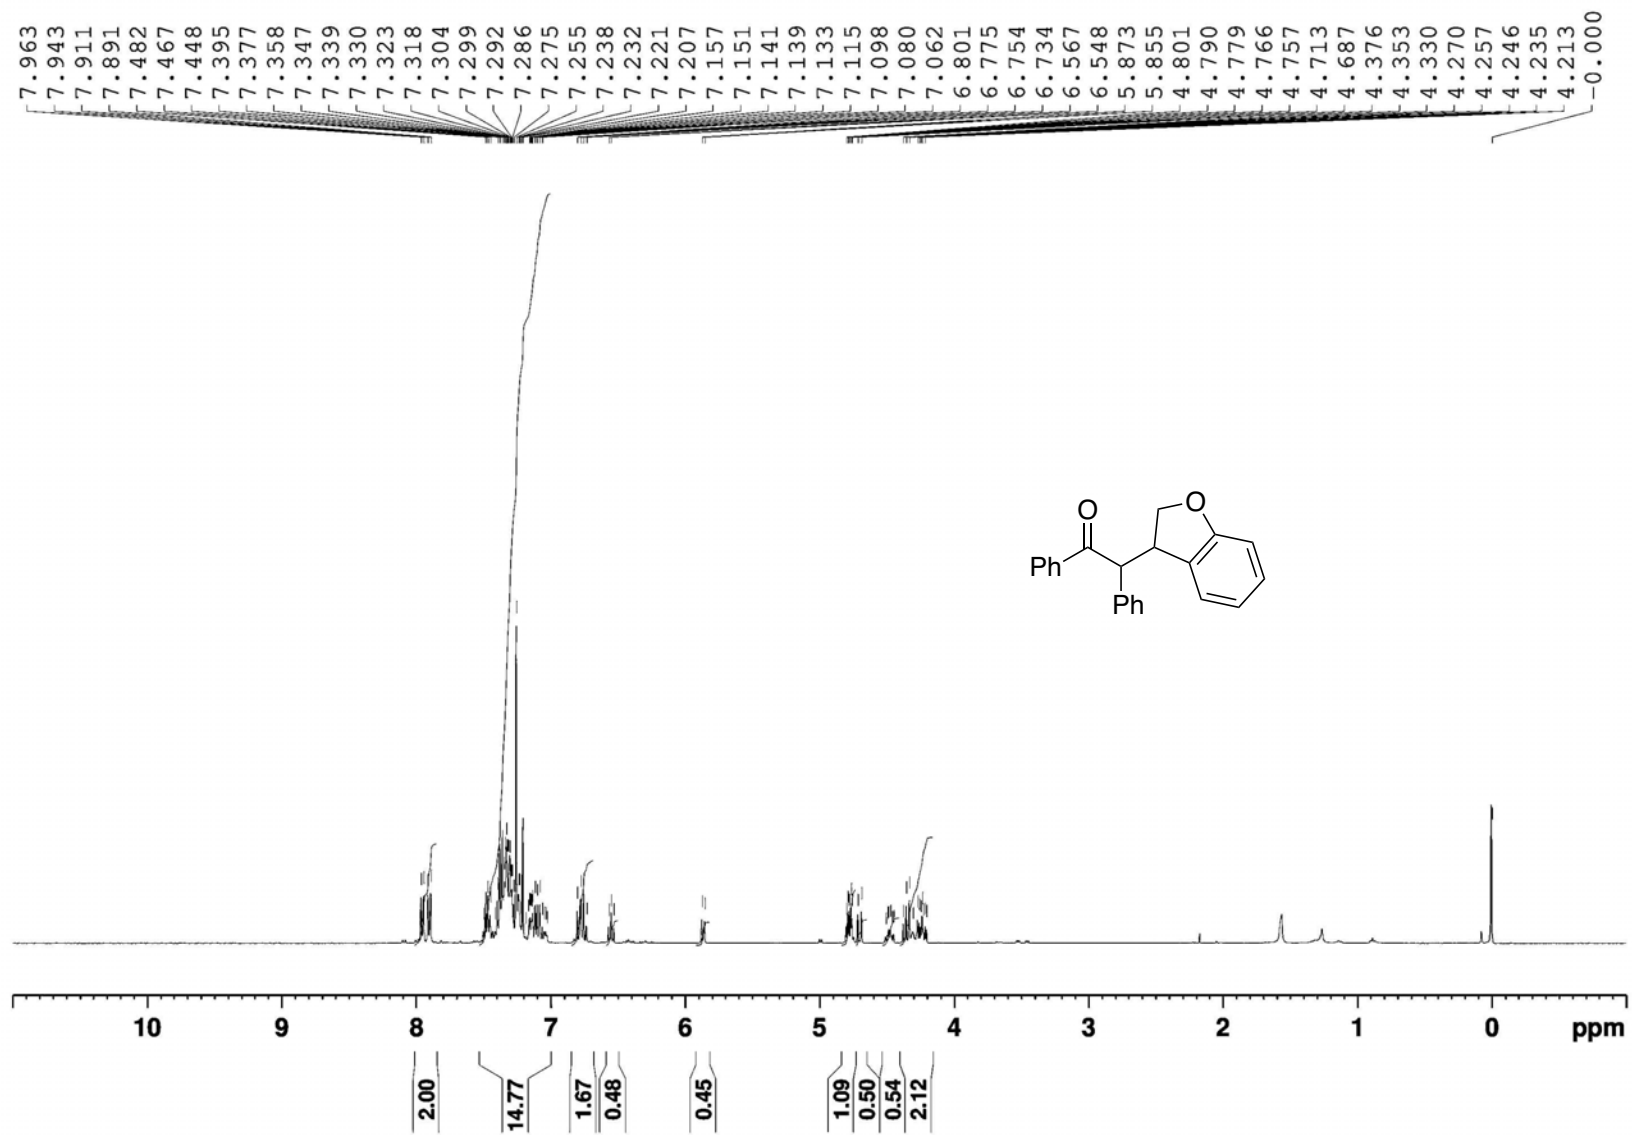

Supplementary Fig. 13 | <sup>1</sup>H NMR spectrum of 3aa

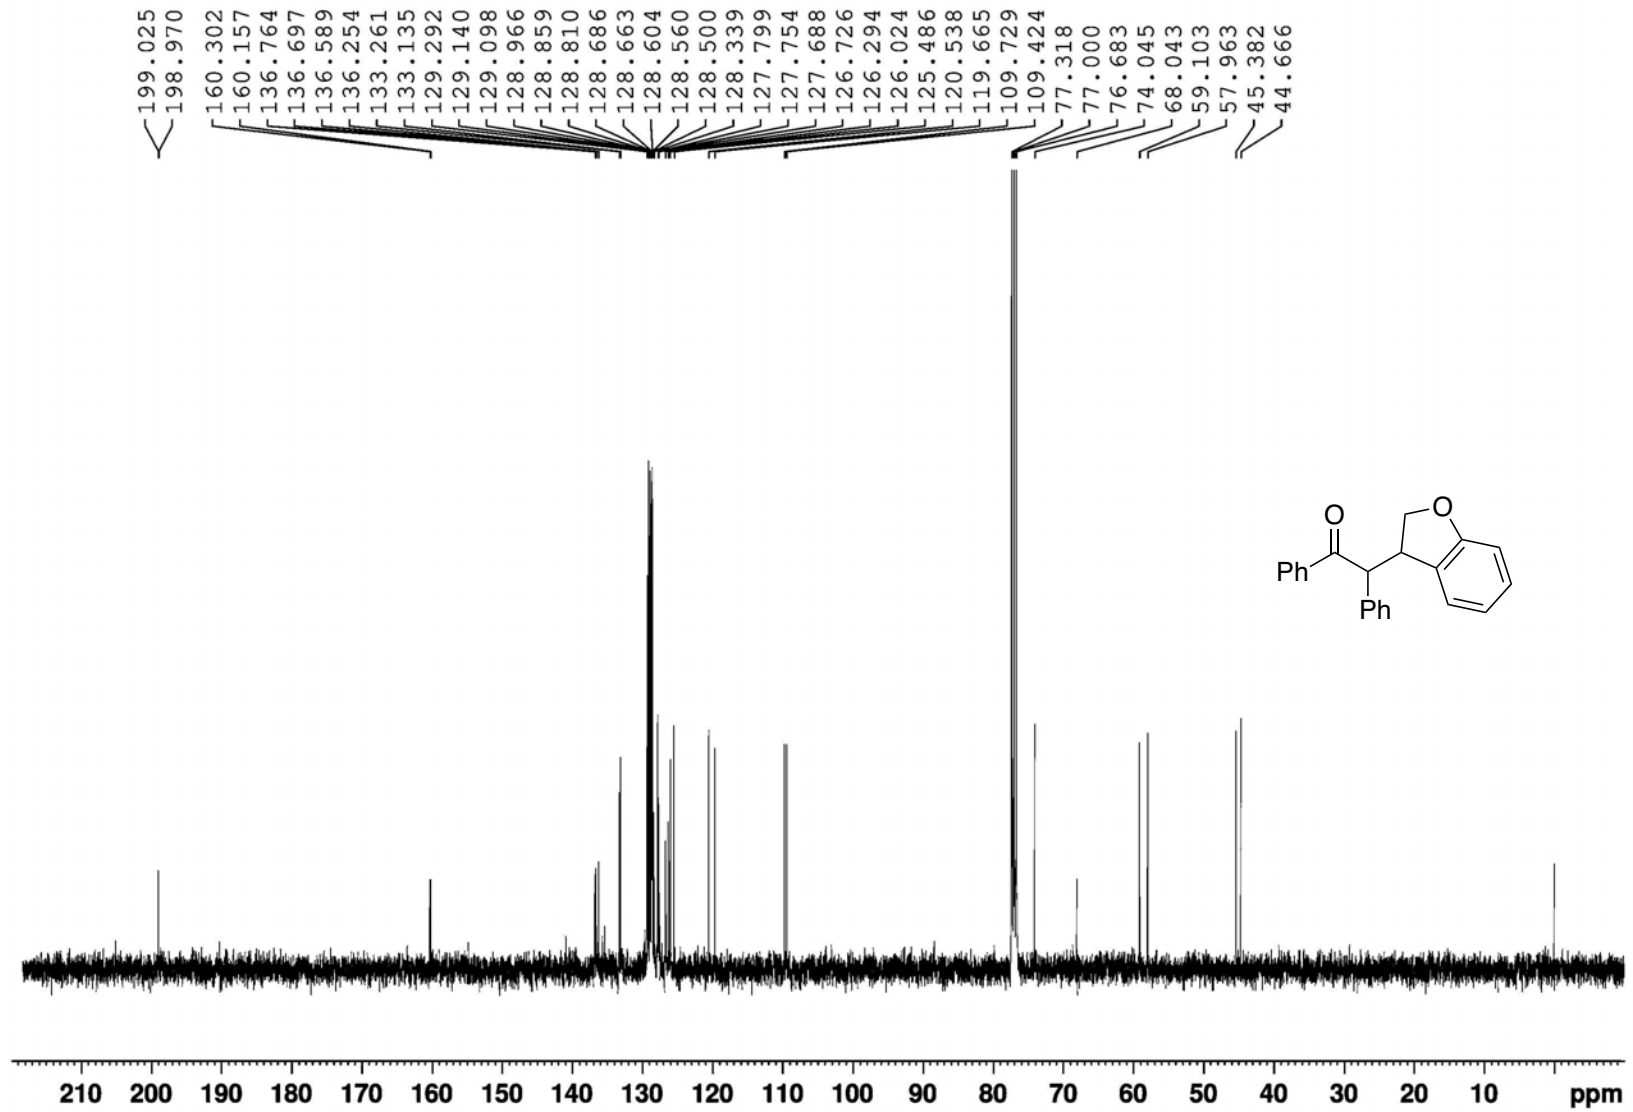

Supplementary Fig. 14 | <sup>13</sup>C NMR spectrum of 3aa

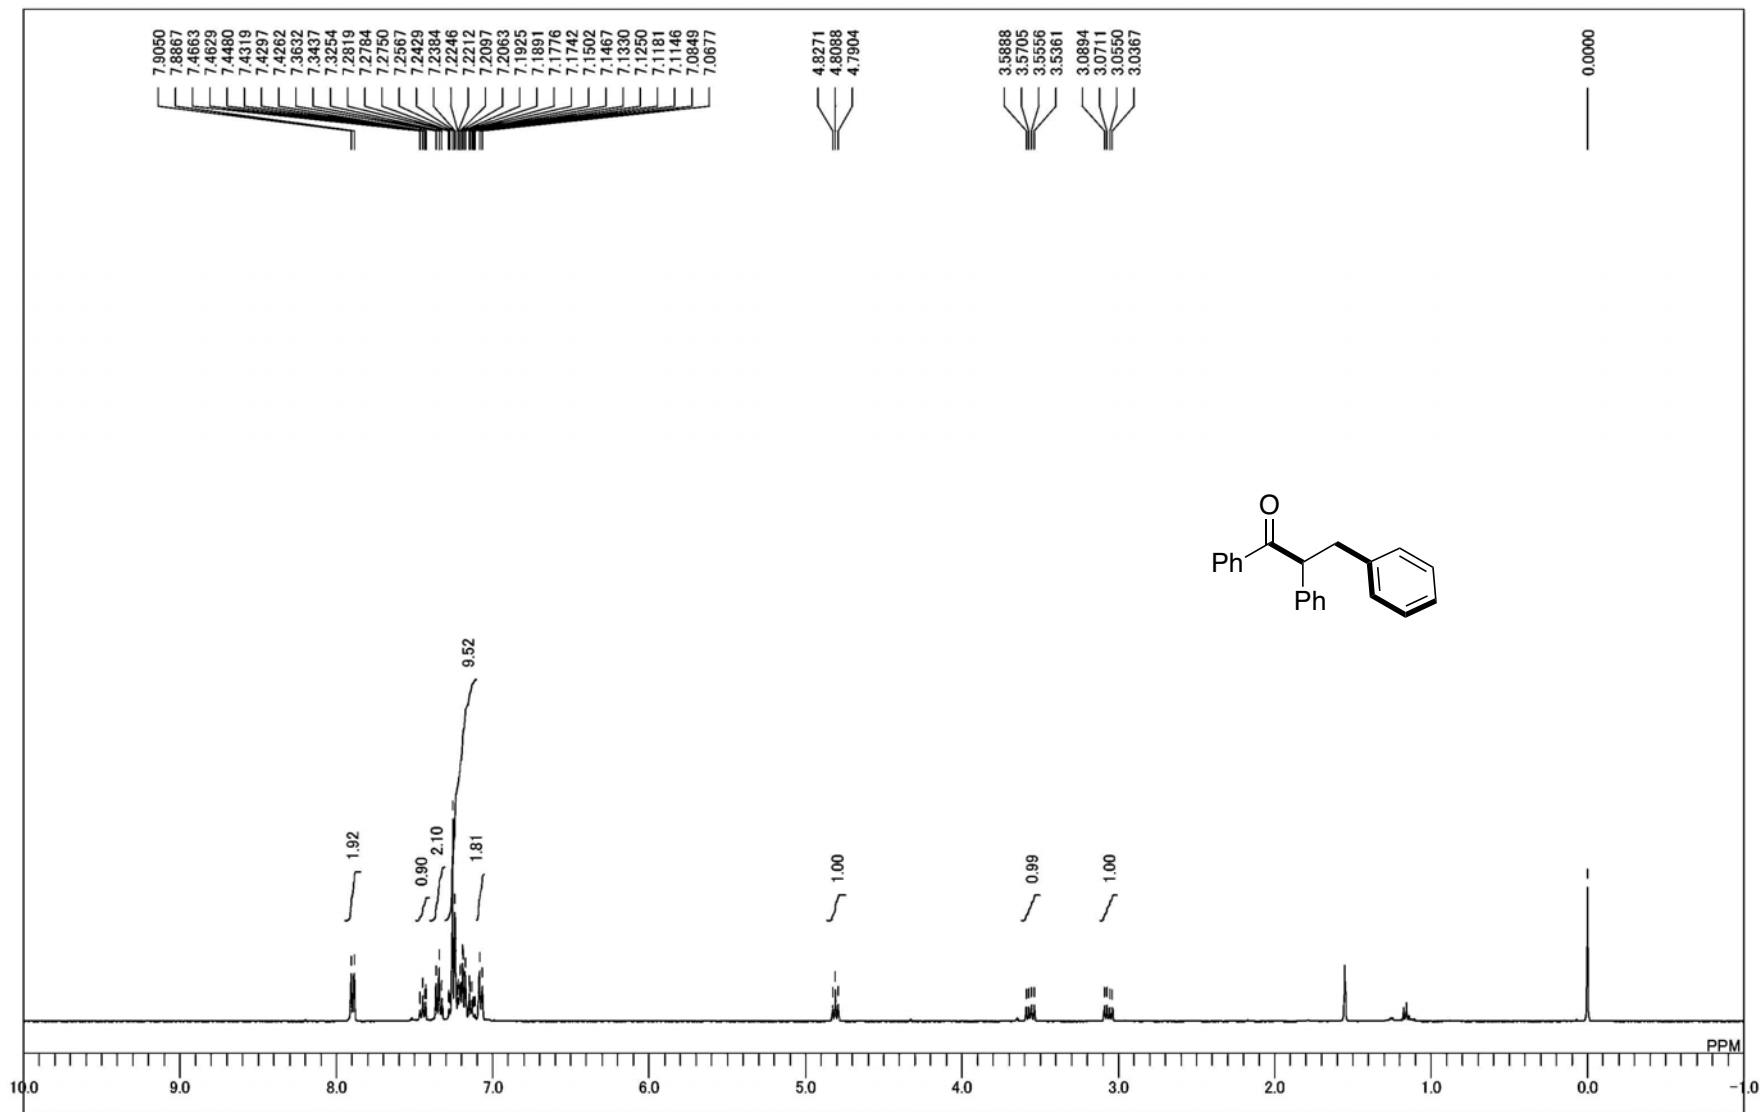

Supplementary Fig. 15 | <sup>1</sup>H NMR spectrum of 6aaa



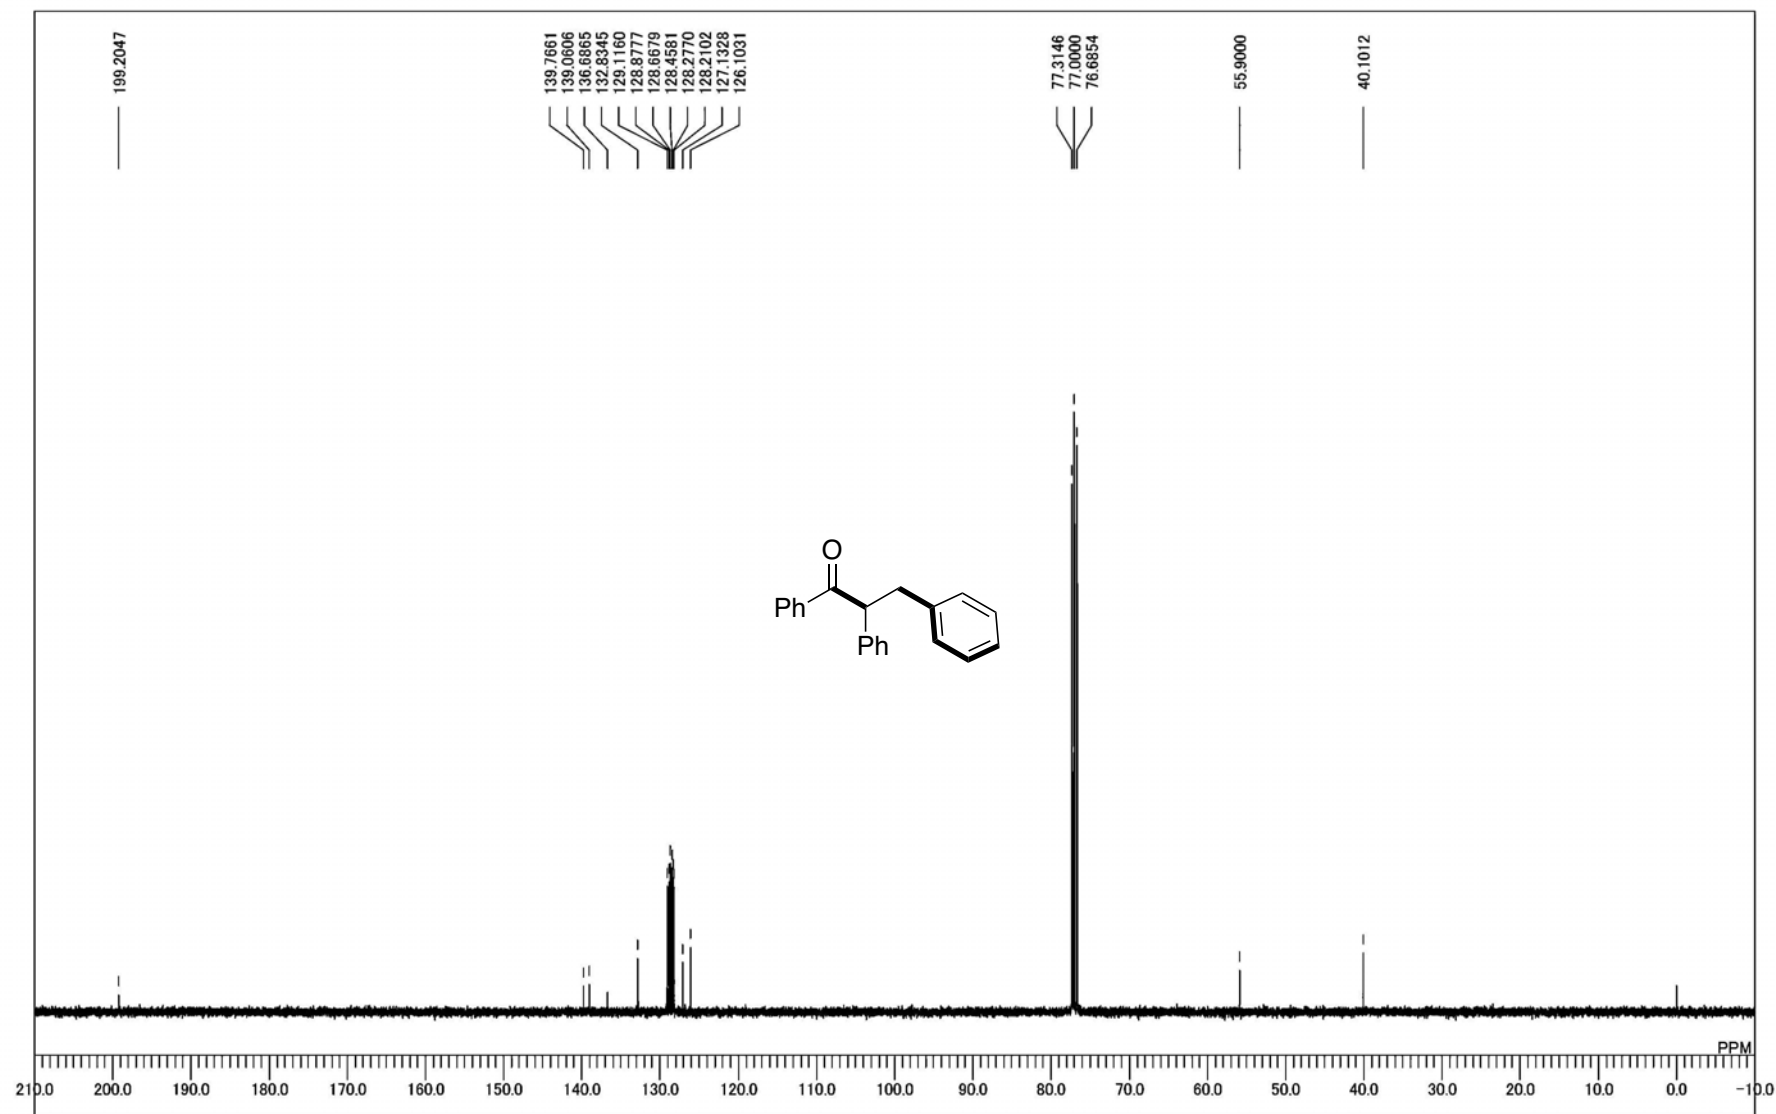

Supplementary Fig. 16 | <sup>13</sup>C NMR spectrum of **6aaa**

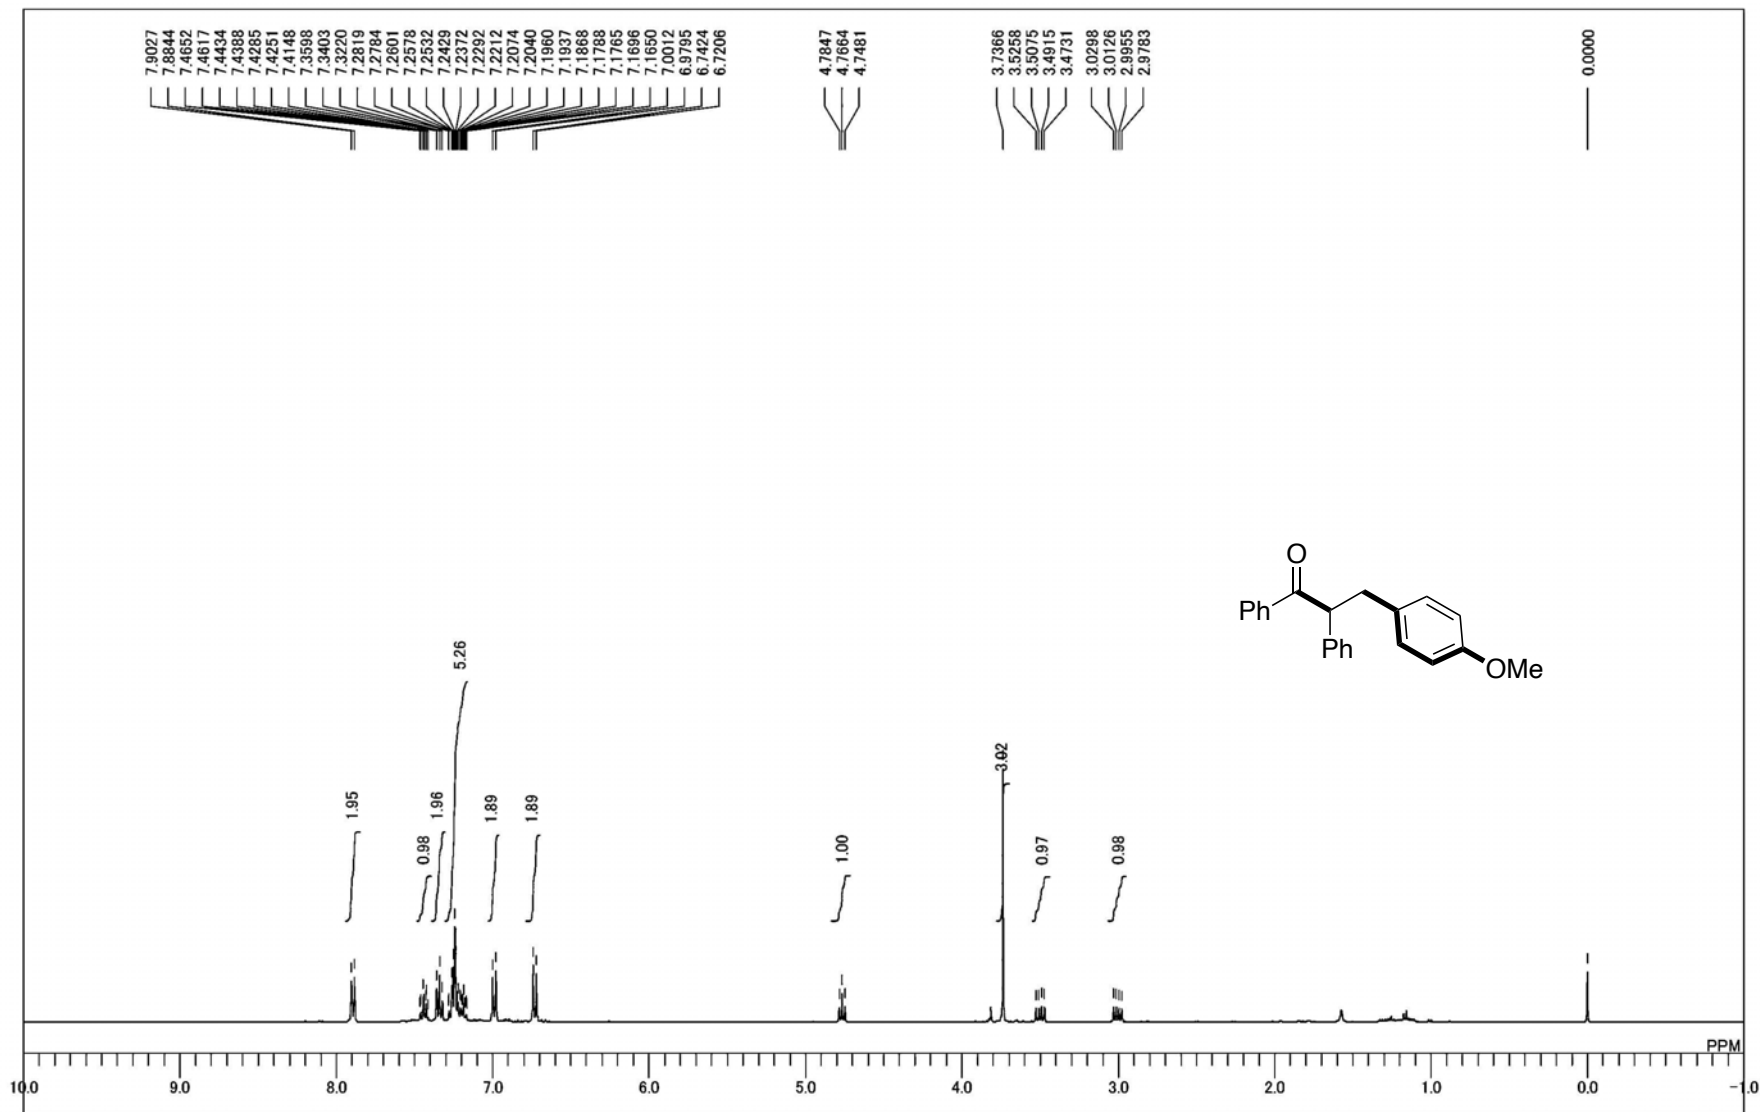

Supplementary Fig. 17 |  $^1\text{H}$  NMR spectrum of 6aab

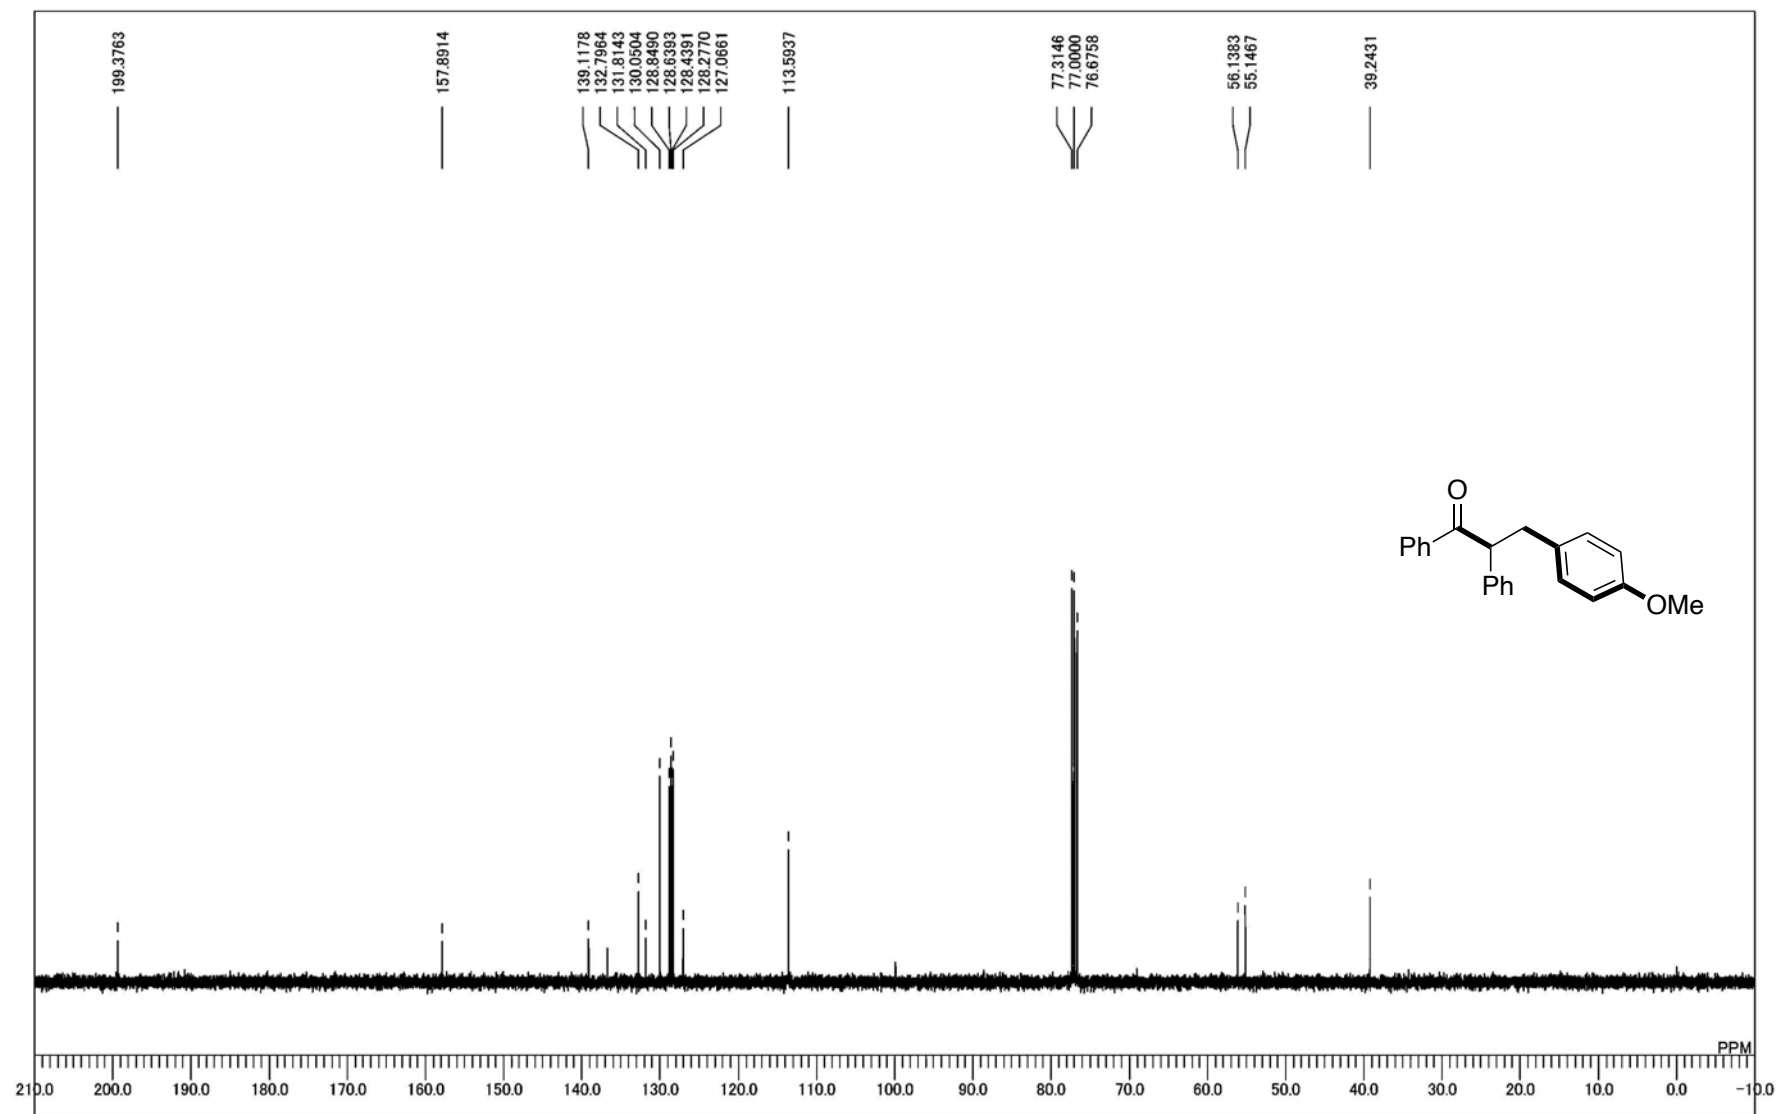

Supplementary Fig. 18 | <sup>13</sup>C NMR spectrum of **6aab**

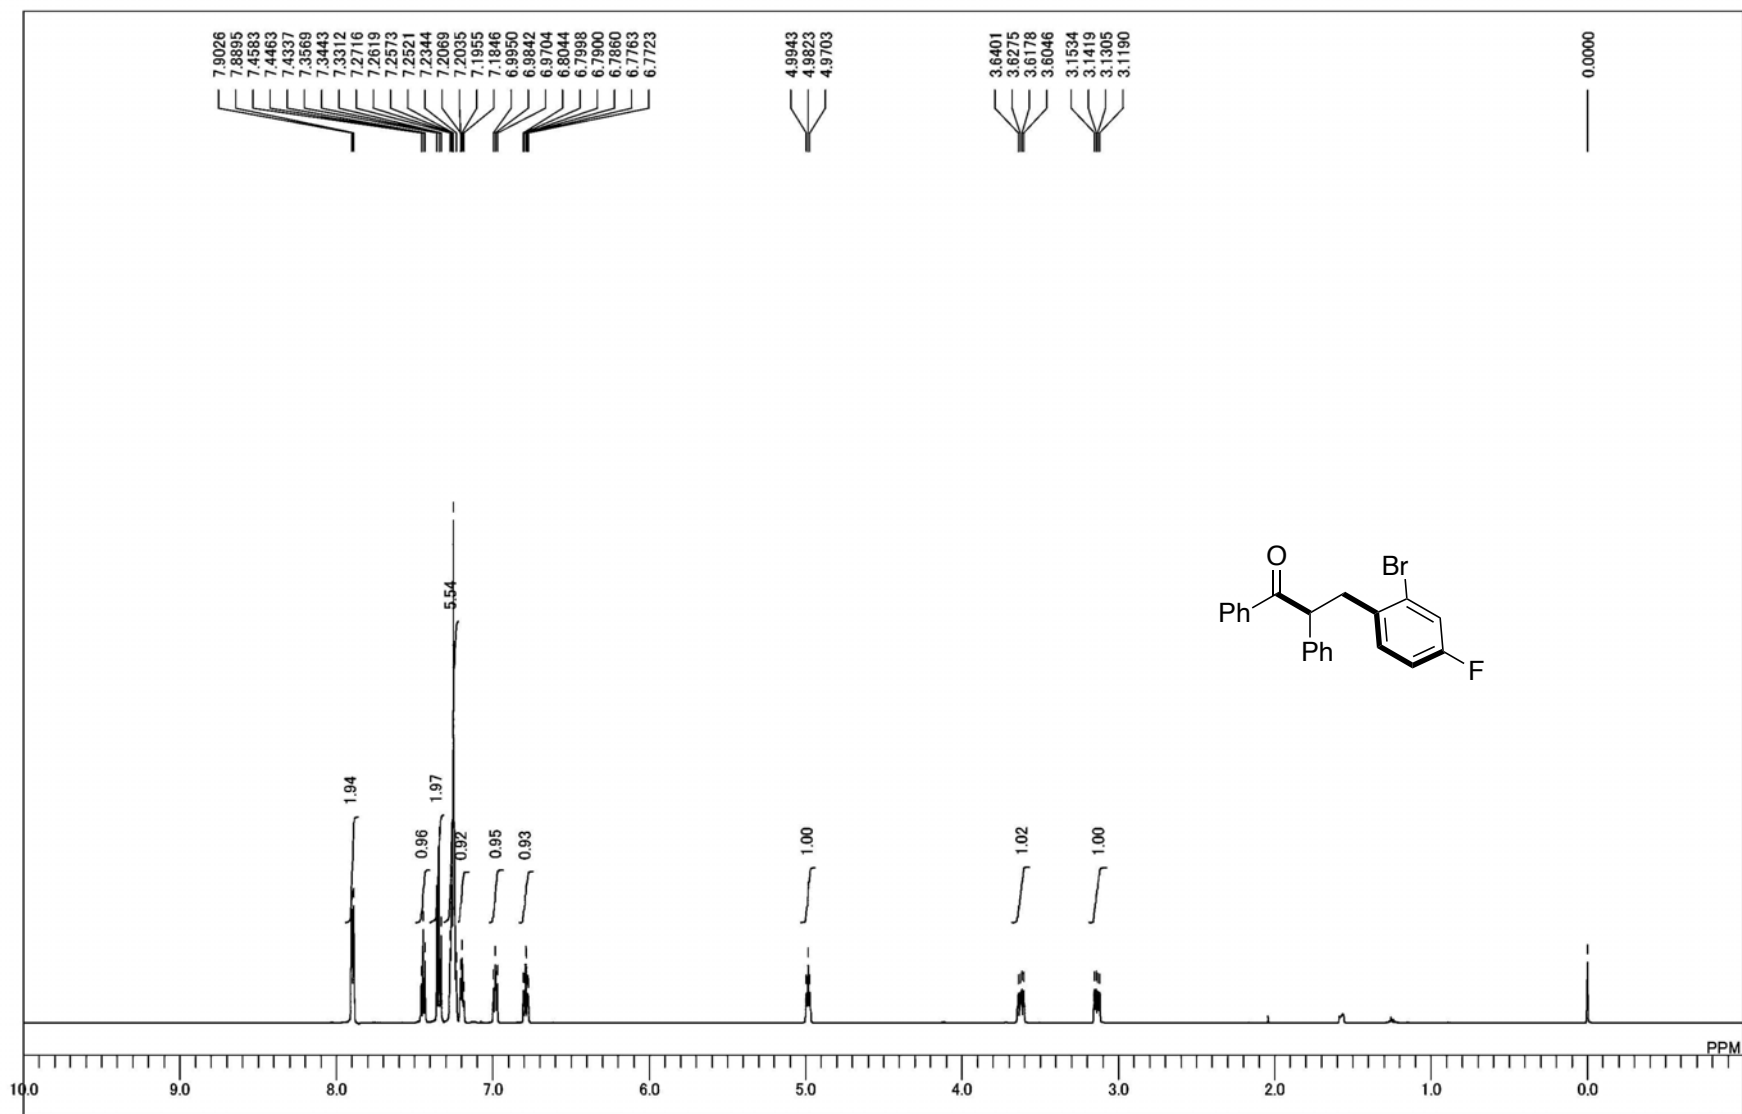

Supplementary Fig. 19 | <sup>1</sup>H NMR spectrum of 6aac

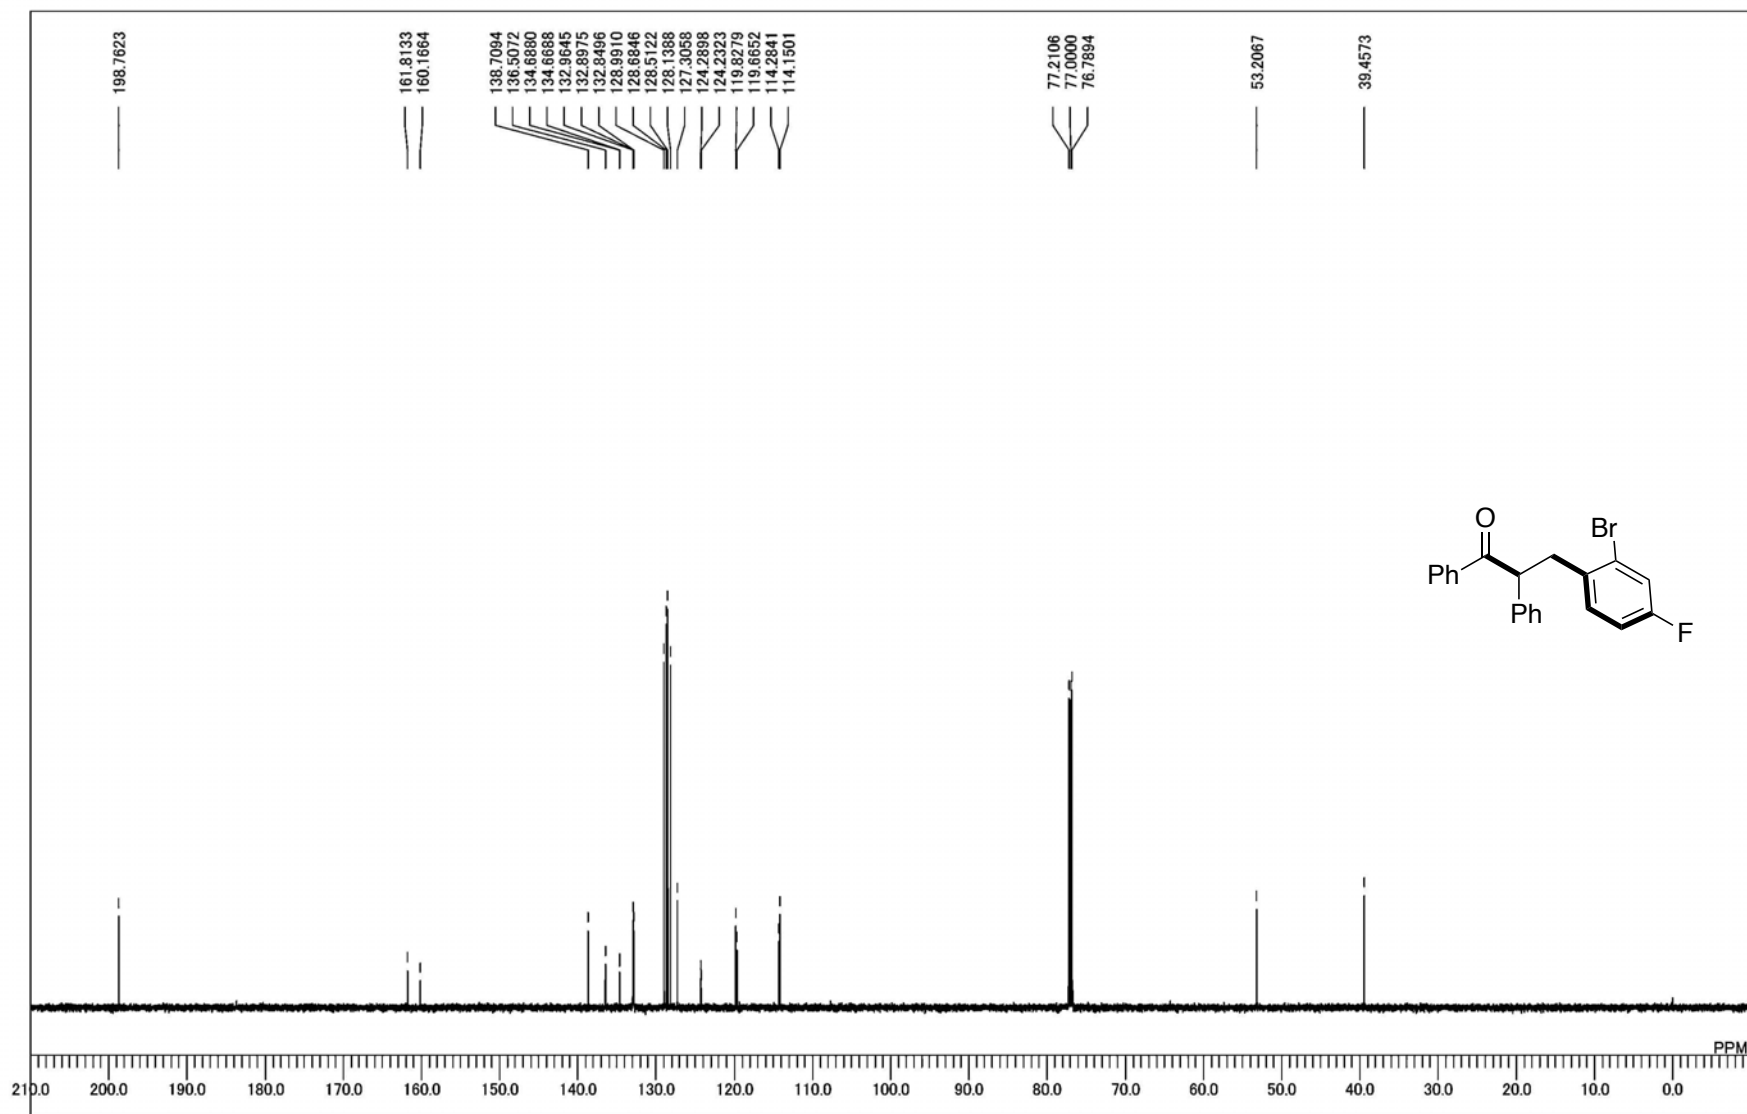

Supplementary Fig. 20 |  $^{13}\text{C}$  NMR spectrum of **6aac**

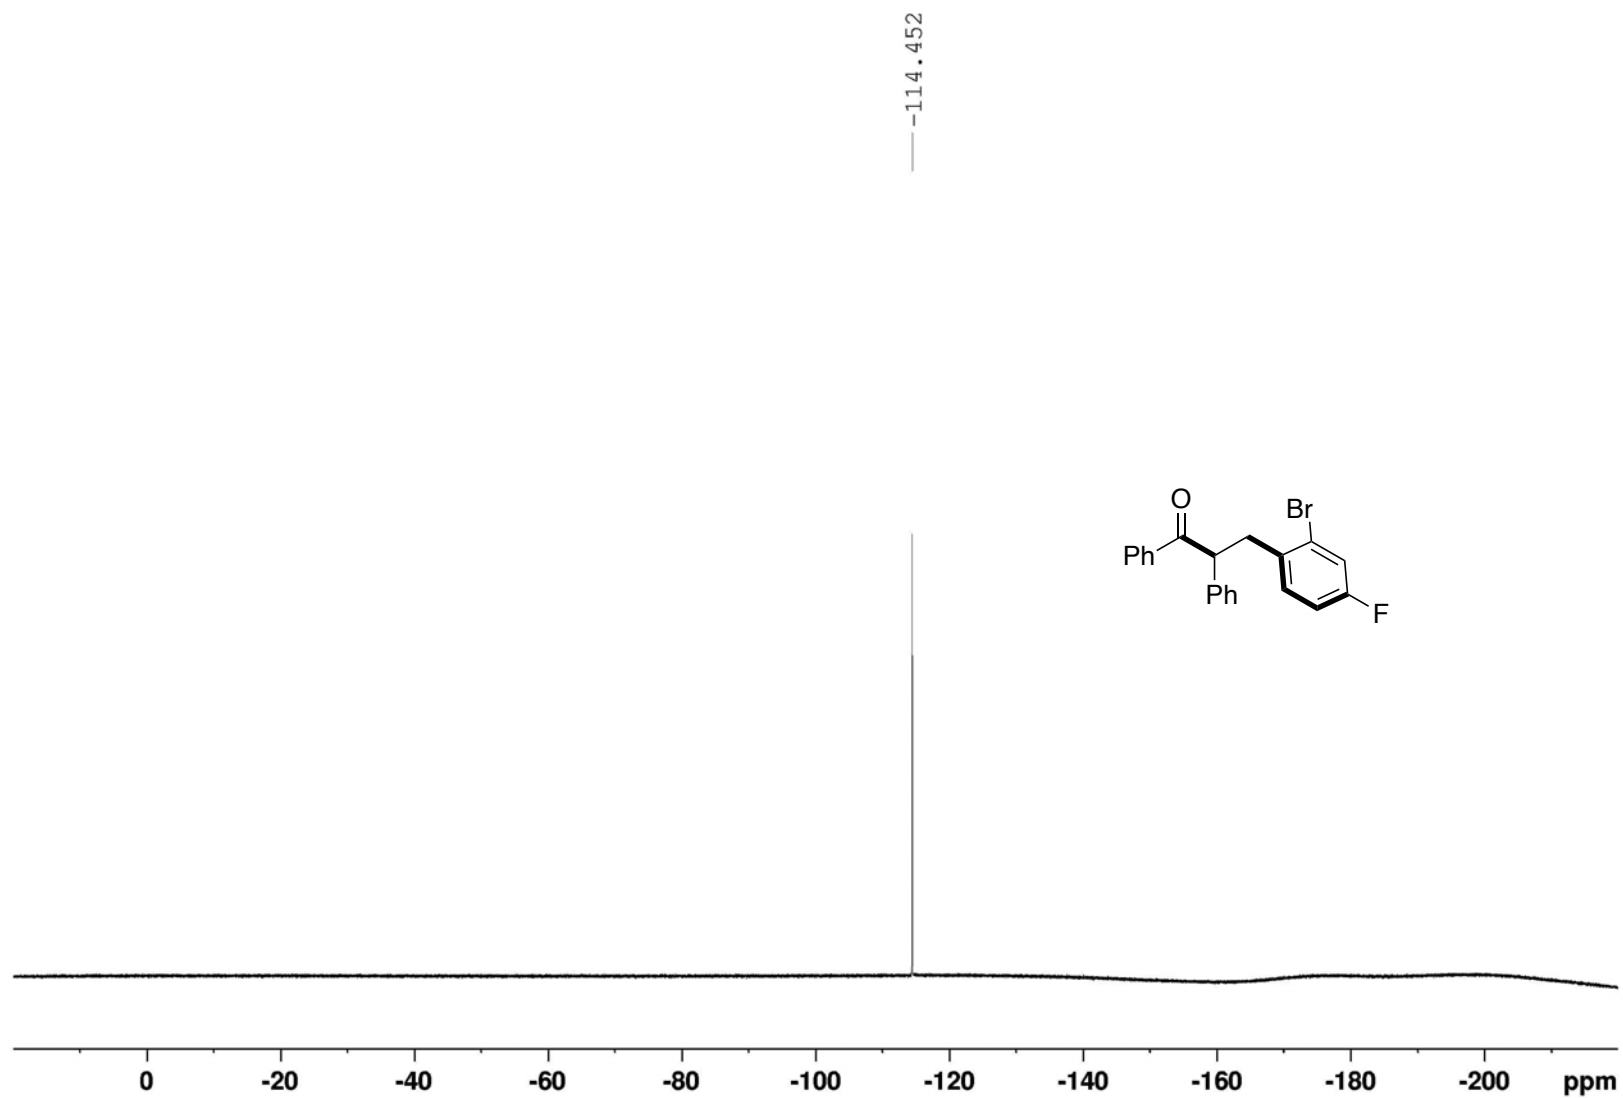

Supplementary Fig. 21 |  $^{19}\text{F}$  NMR spectrum of **6aac**

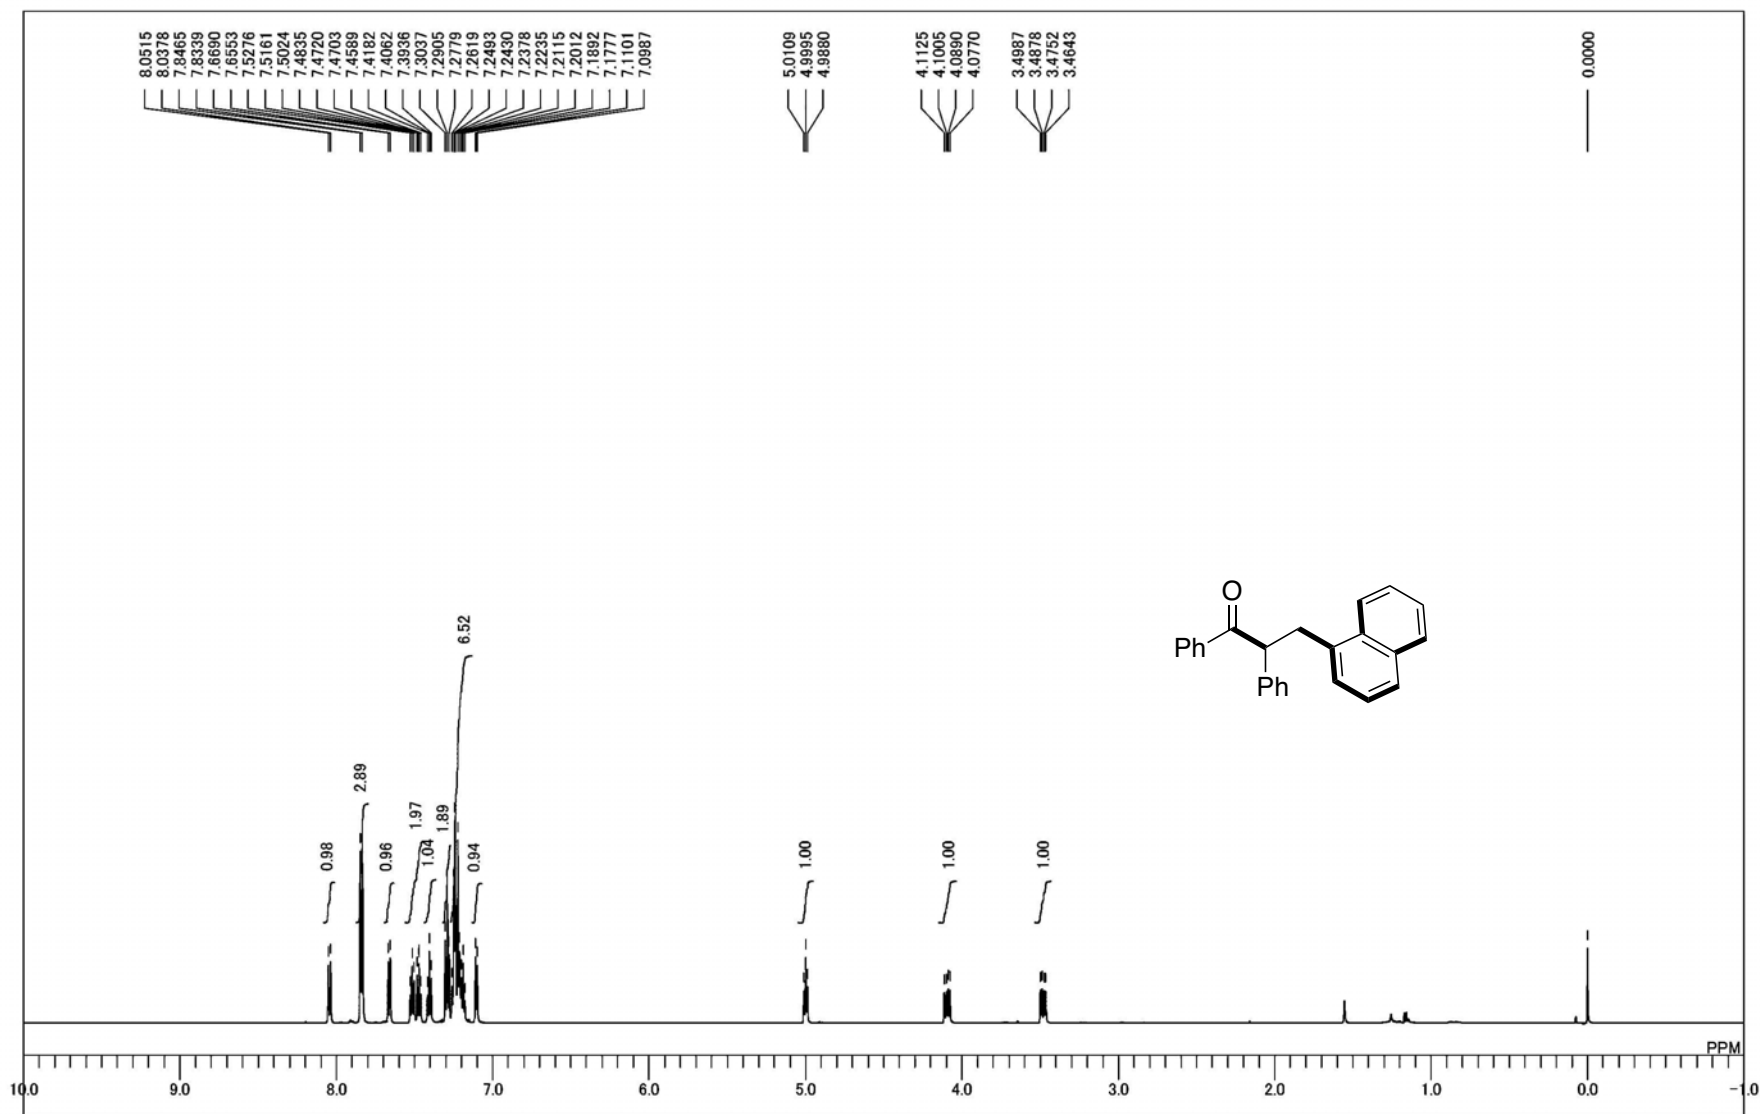

Supplementary Fig. 22 |  $^1\text{H}$  NMR spectrum of 6aad

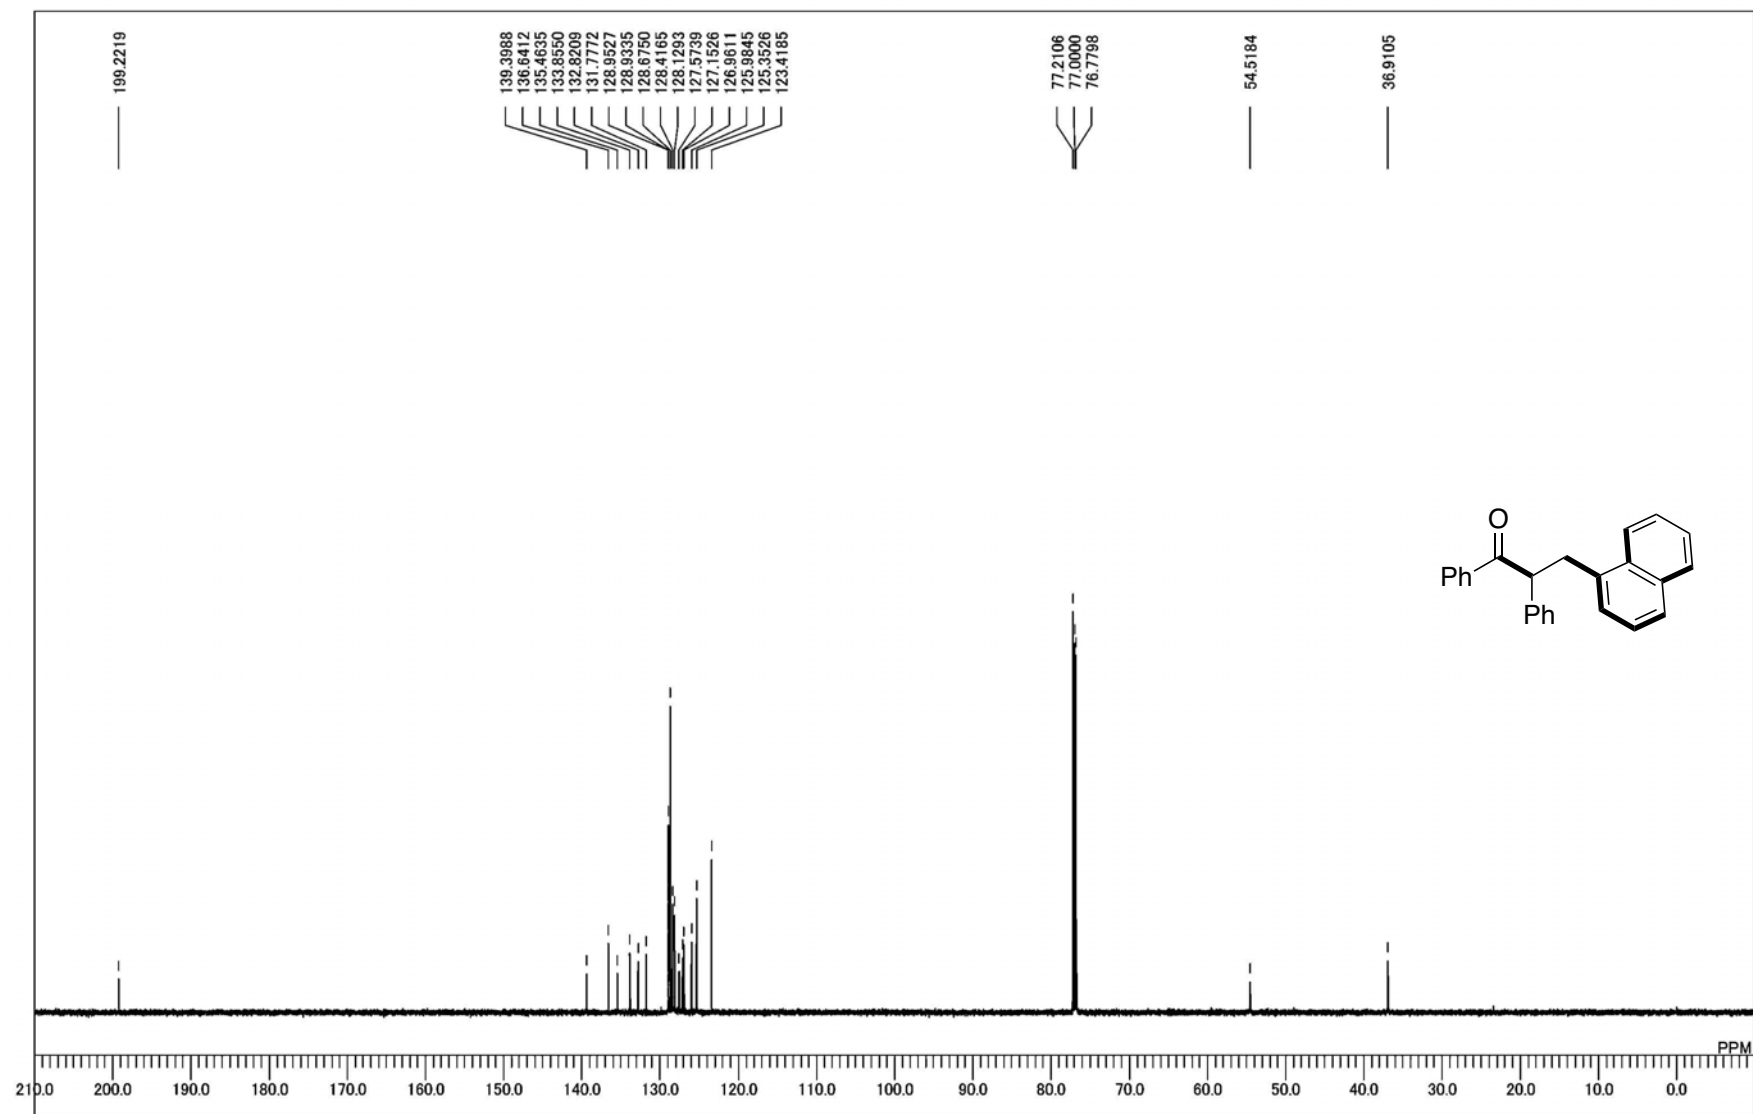

Supplementary Fig. 23 | <sup>13</sup>C NMR spectrum of 6aad



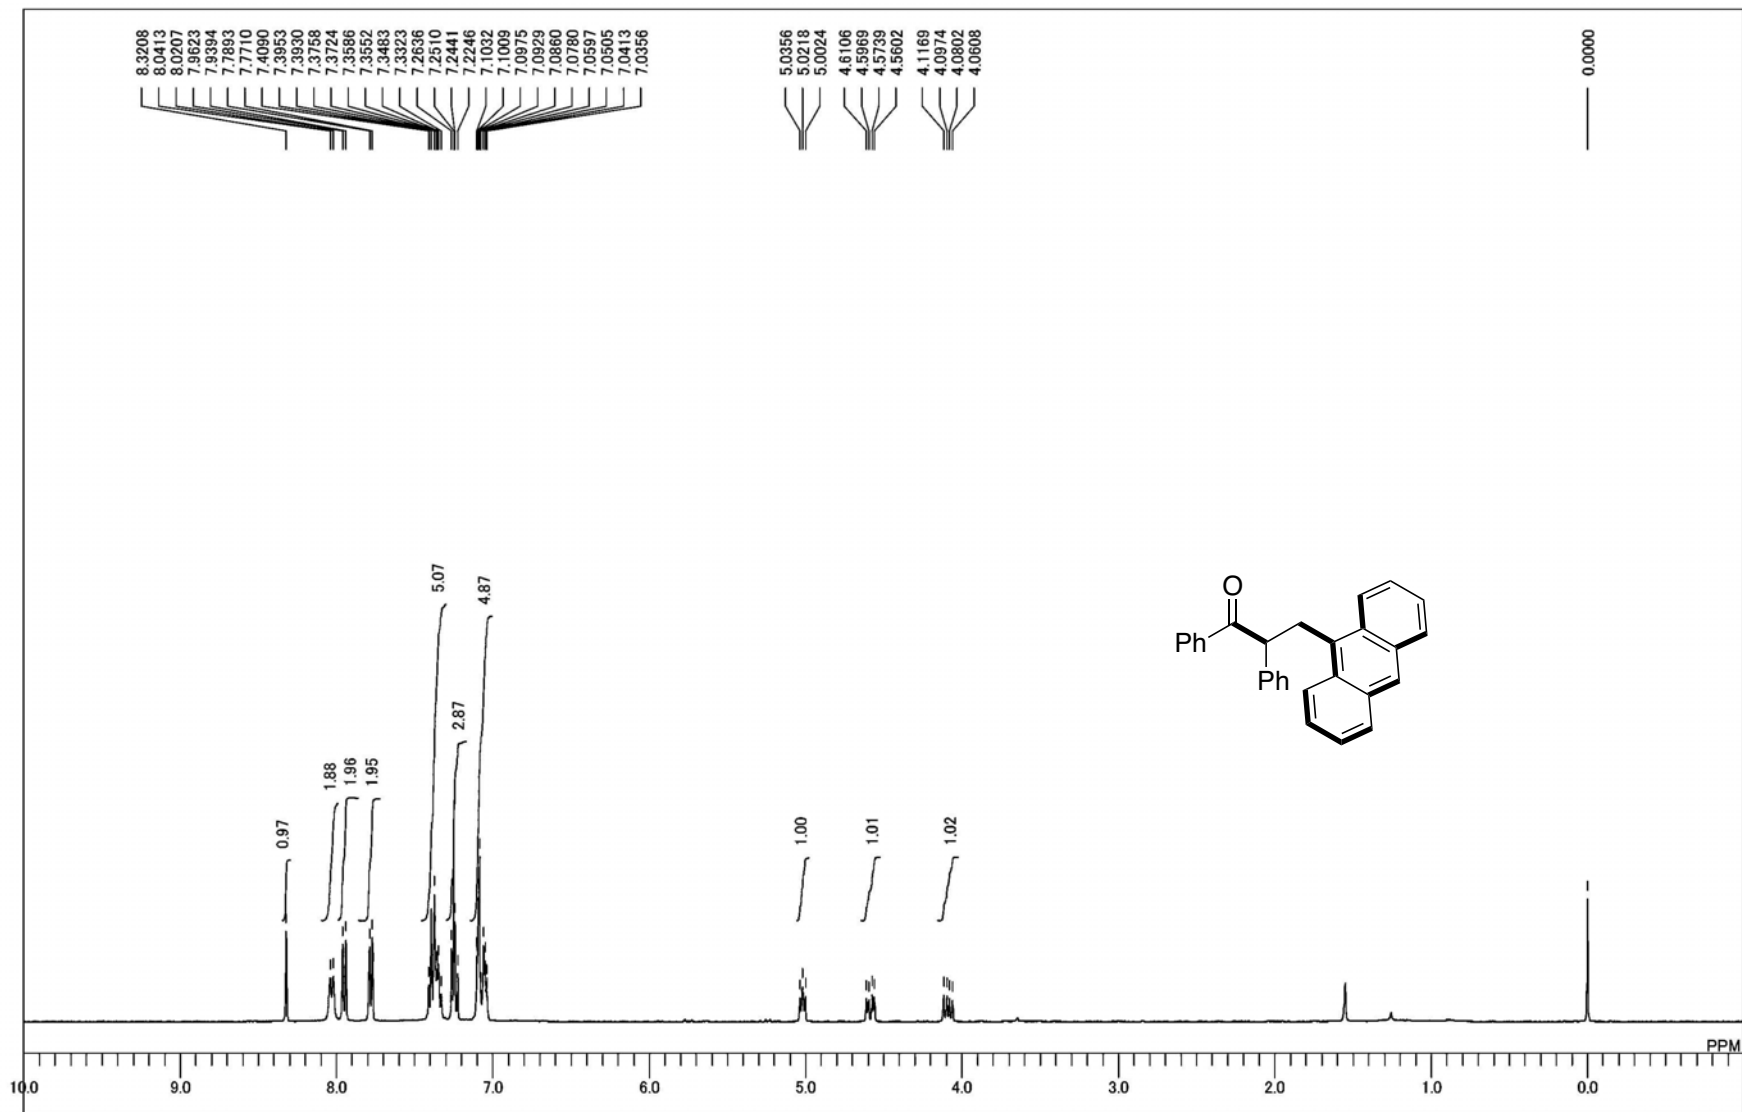

Supplementary Fig. 24 |  $^1\text{H}$  NMR spectrum of 6aae

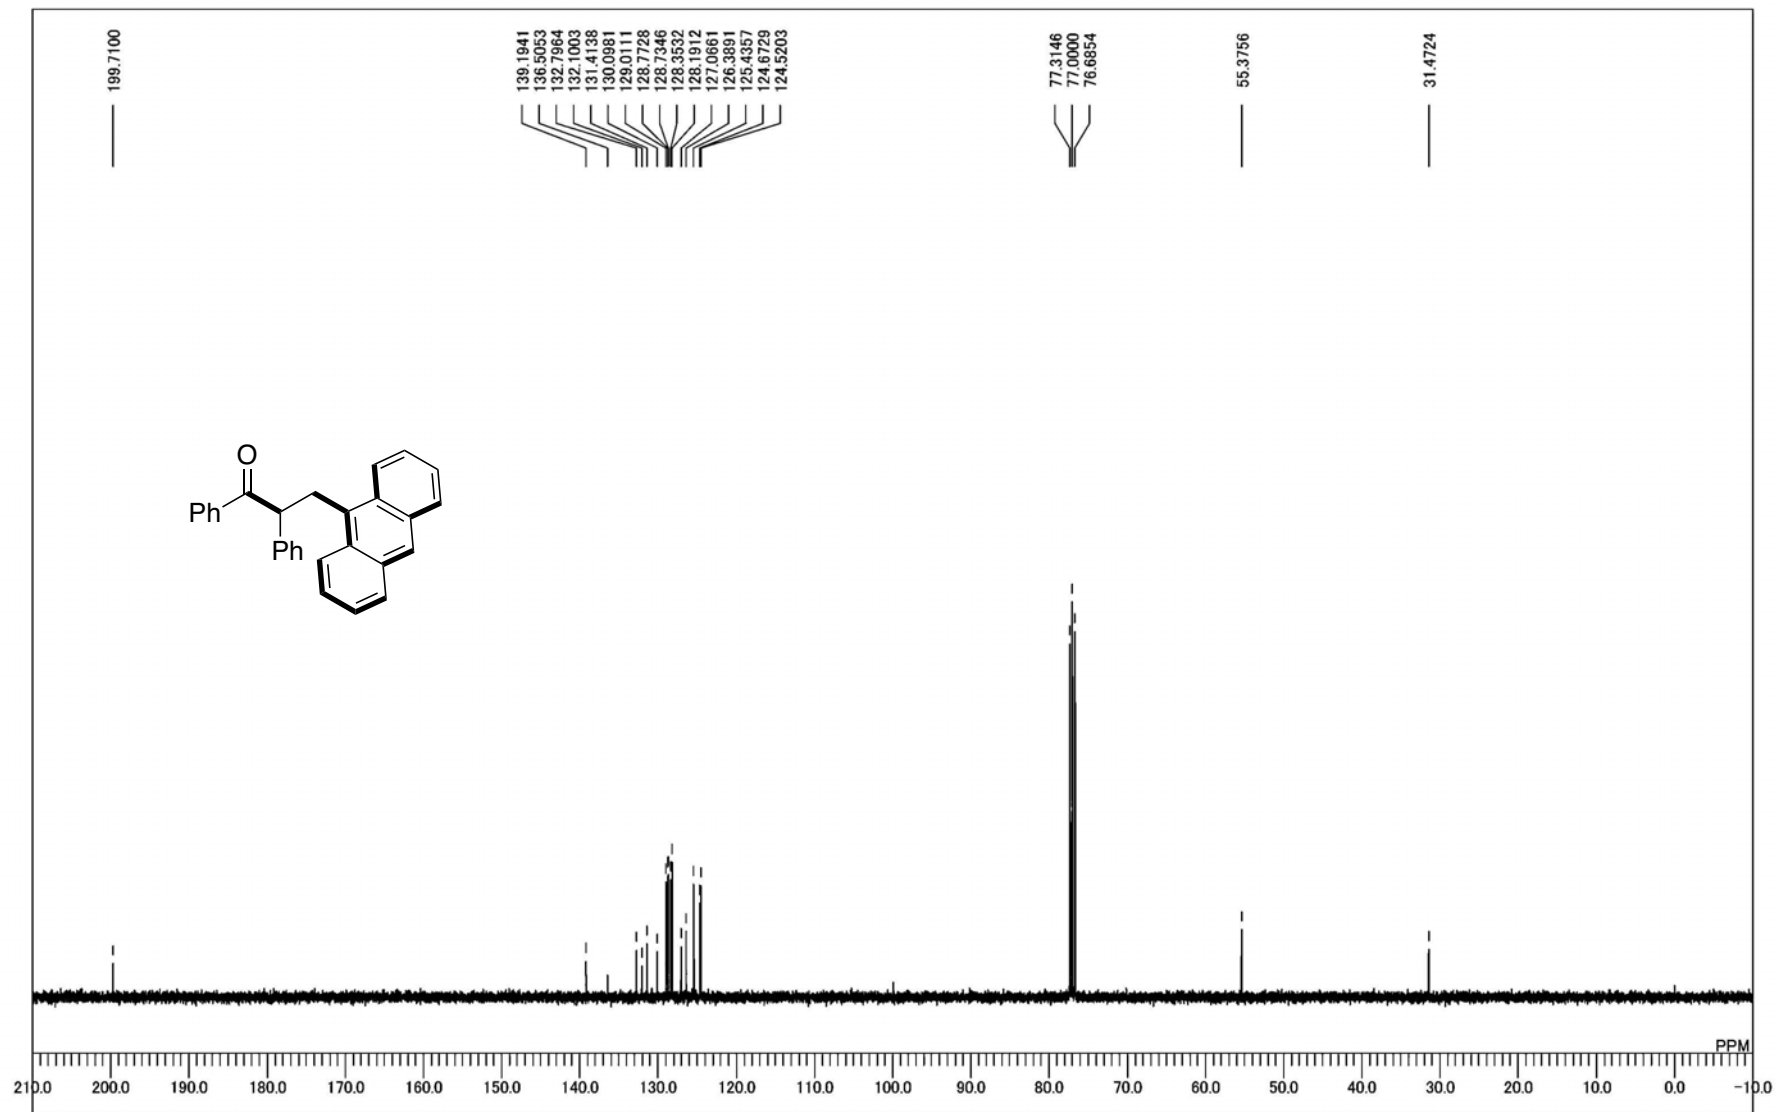

Supplementary Fig. 25 |  $^{13}\text{C}$  NMR spectrum of **6aae**

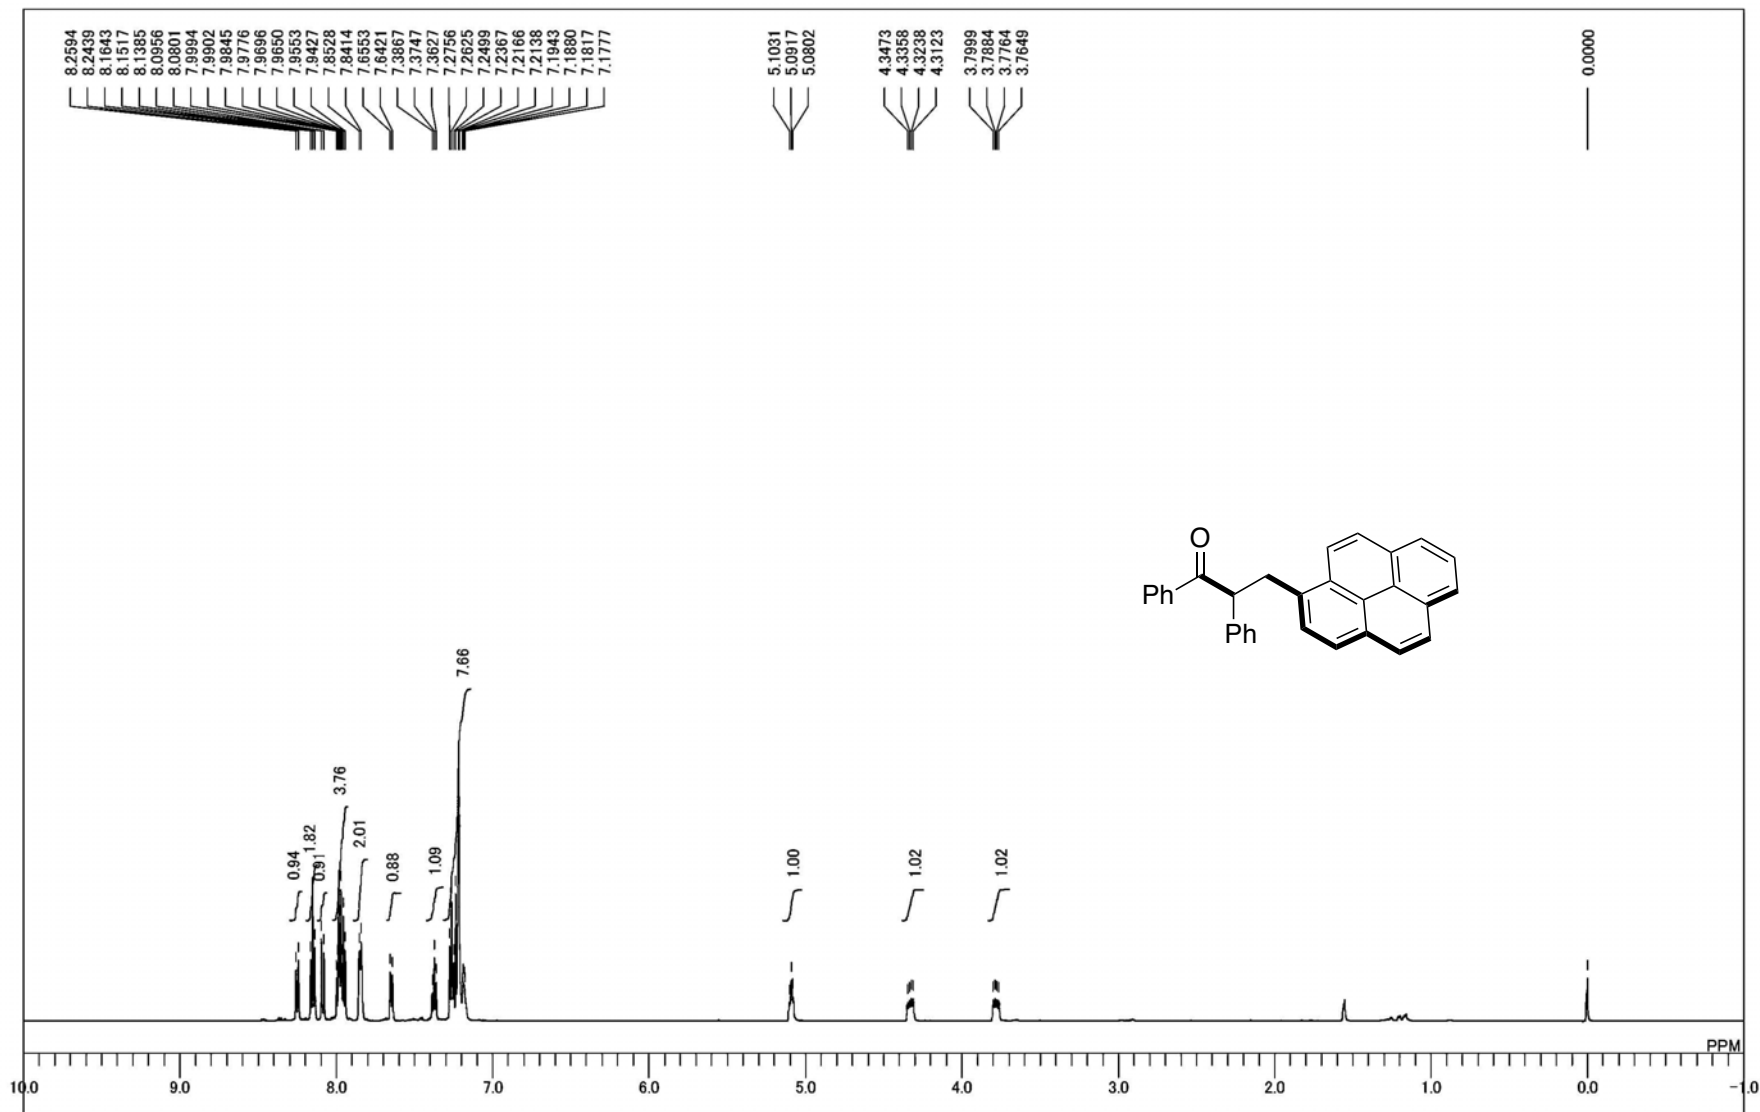

Supplementary Fig. 26 | <sup>1</sup>H NMR spectrum of 6aaf

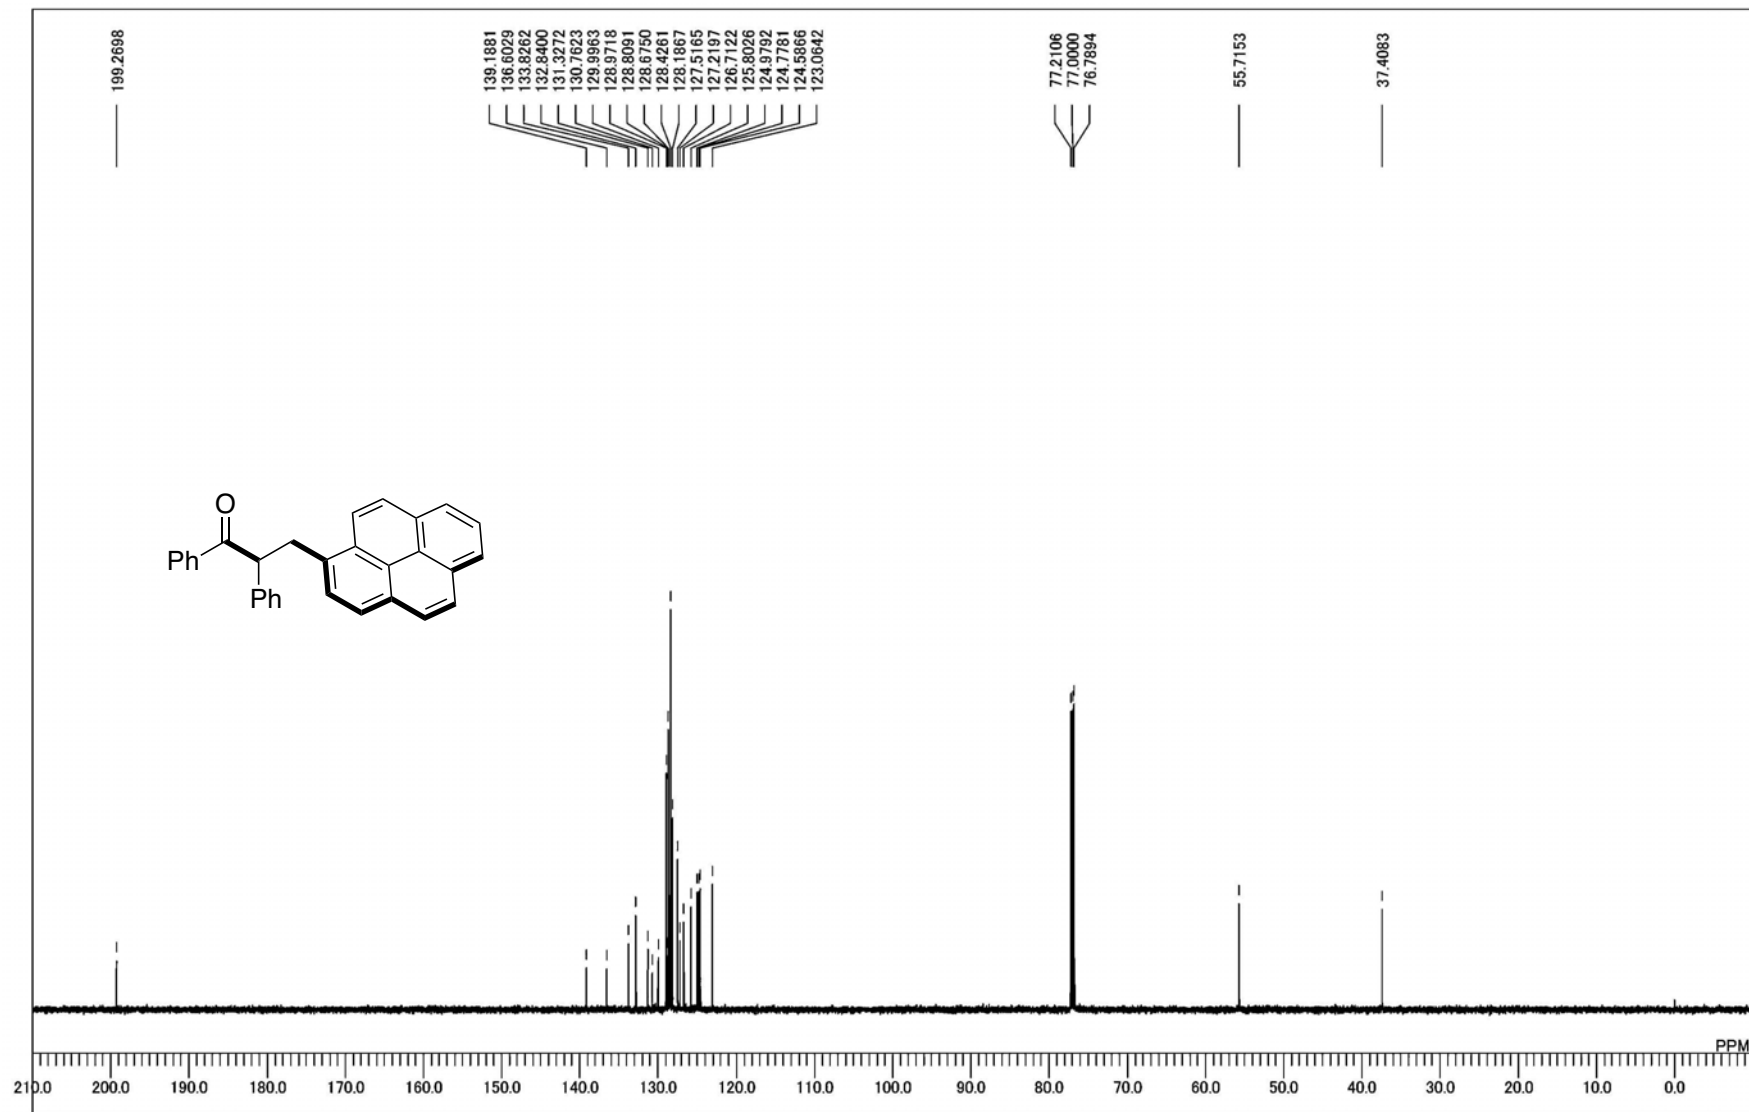

Supplementary Fig. 27 | <sup>13</sup>C NMR spectrum of 6aaf

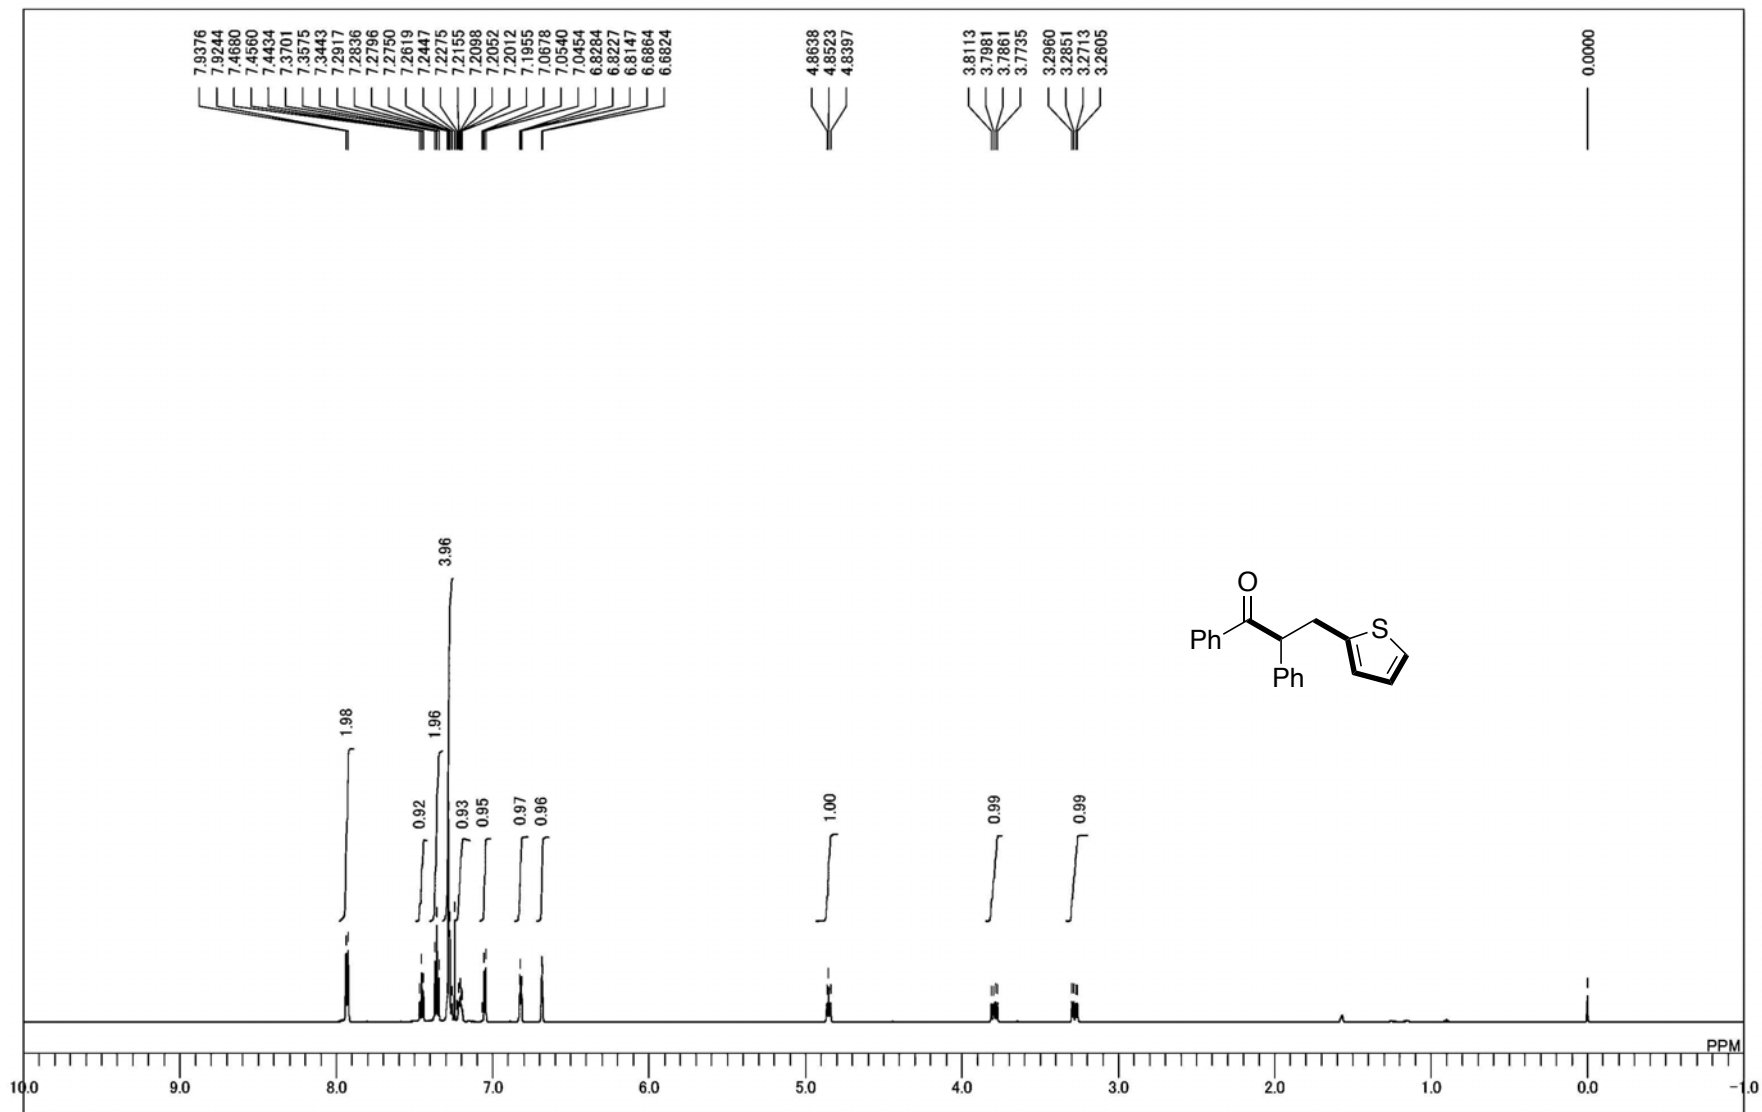

Supplementary Fig. 28 | <sup>1</sup>H NMR spectrum of 6aag

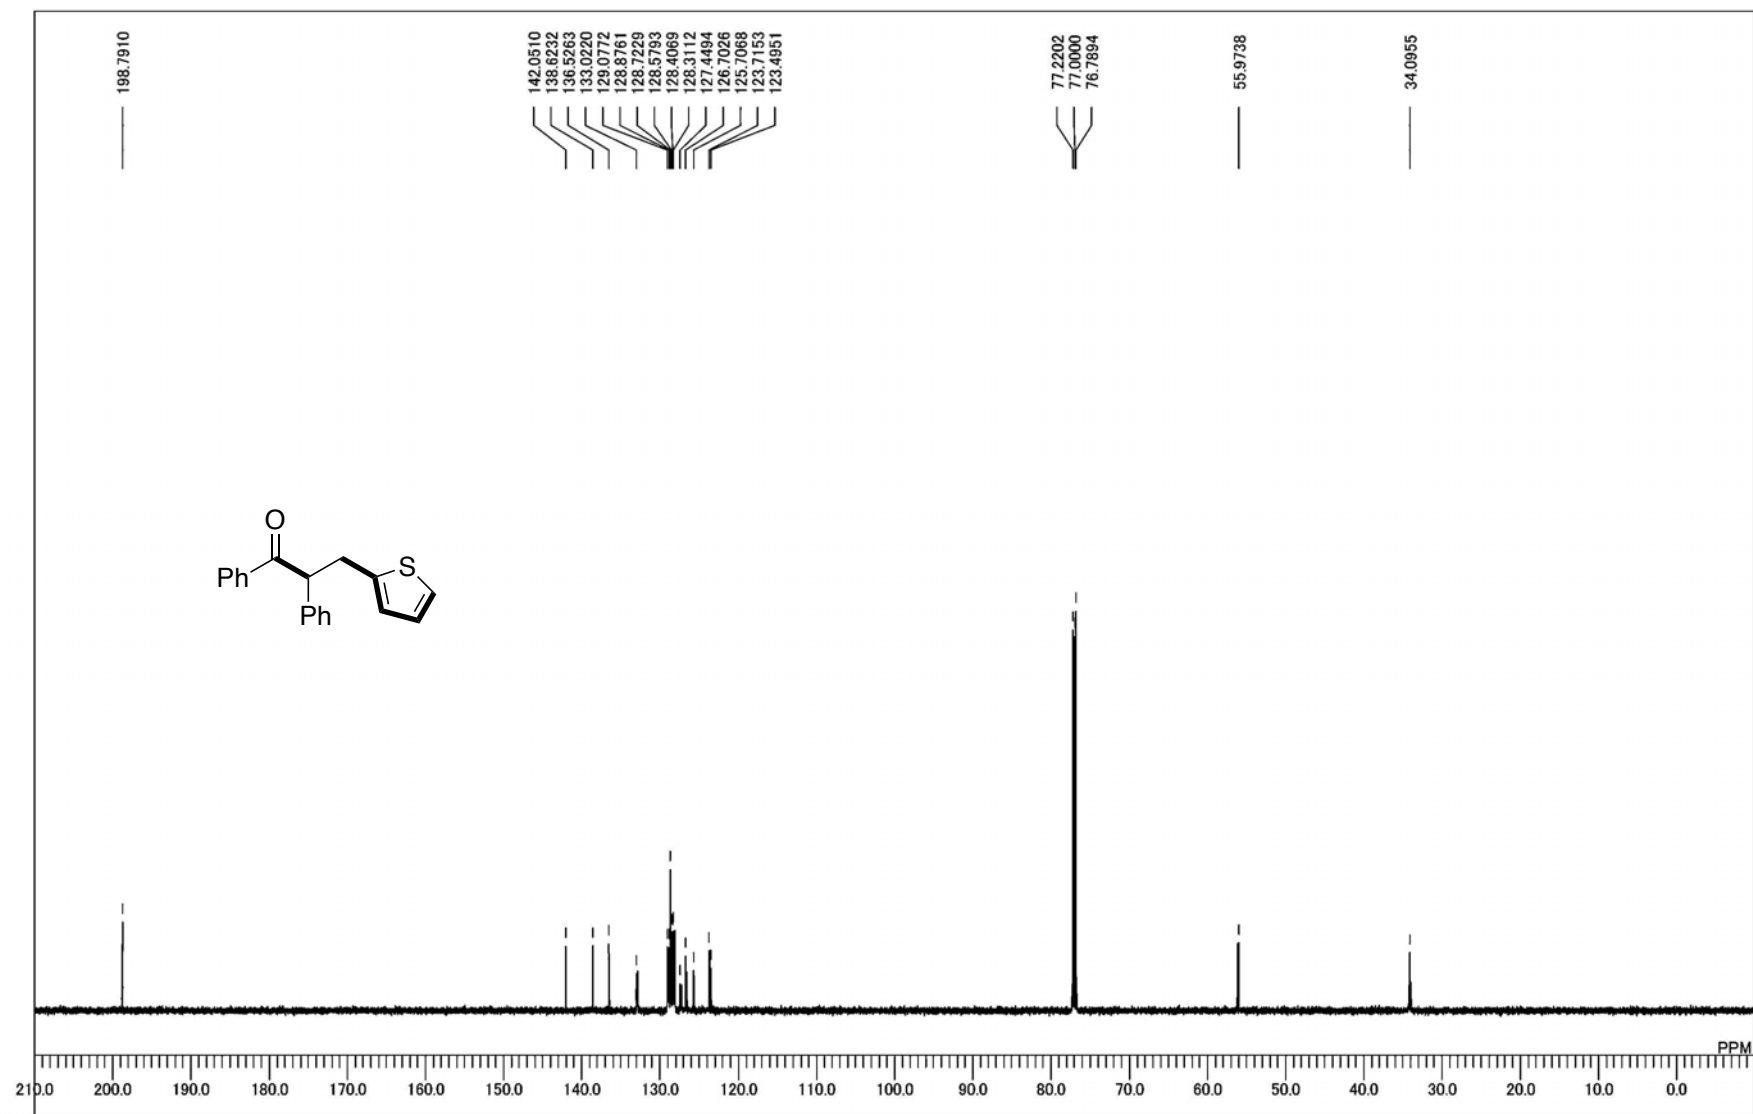

Supplementary Fig. 29 | <sup>13</sup>C NMR spectrum of **6aag**

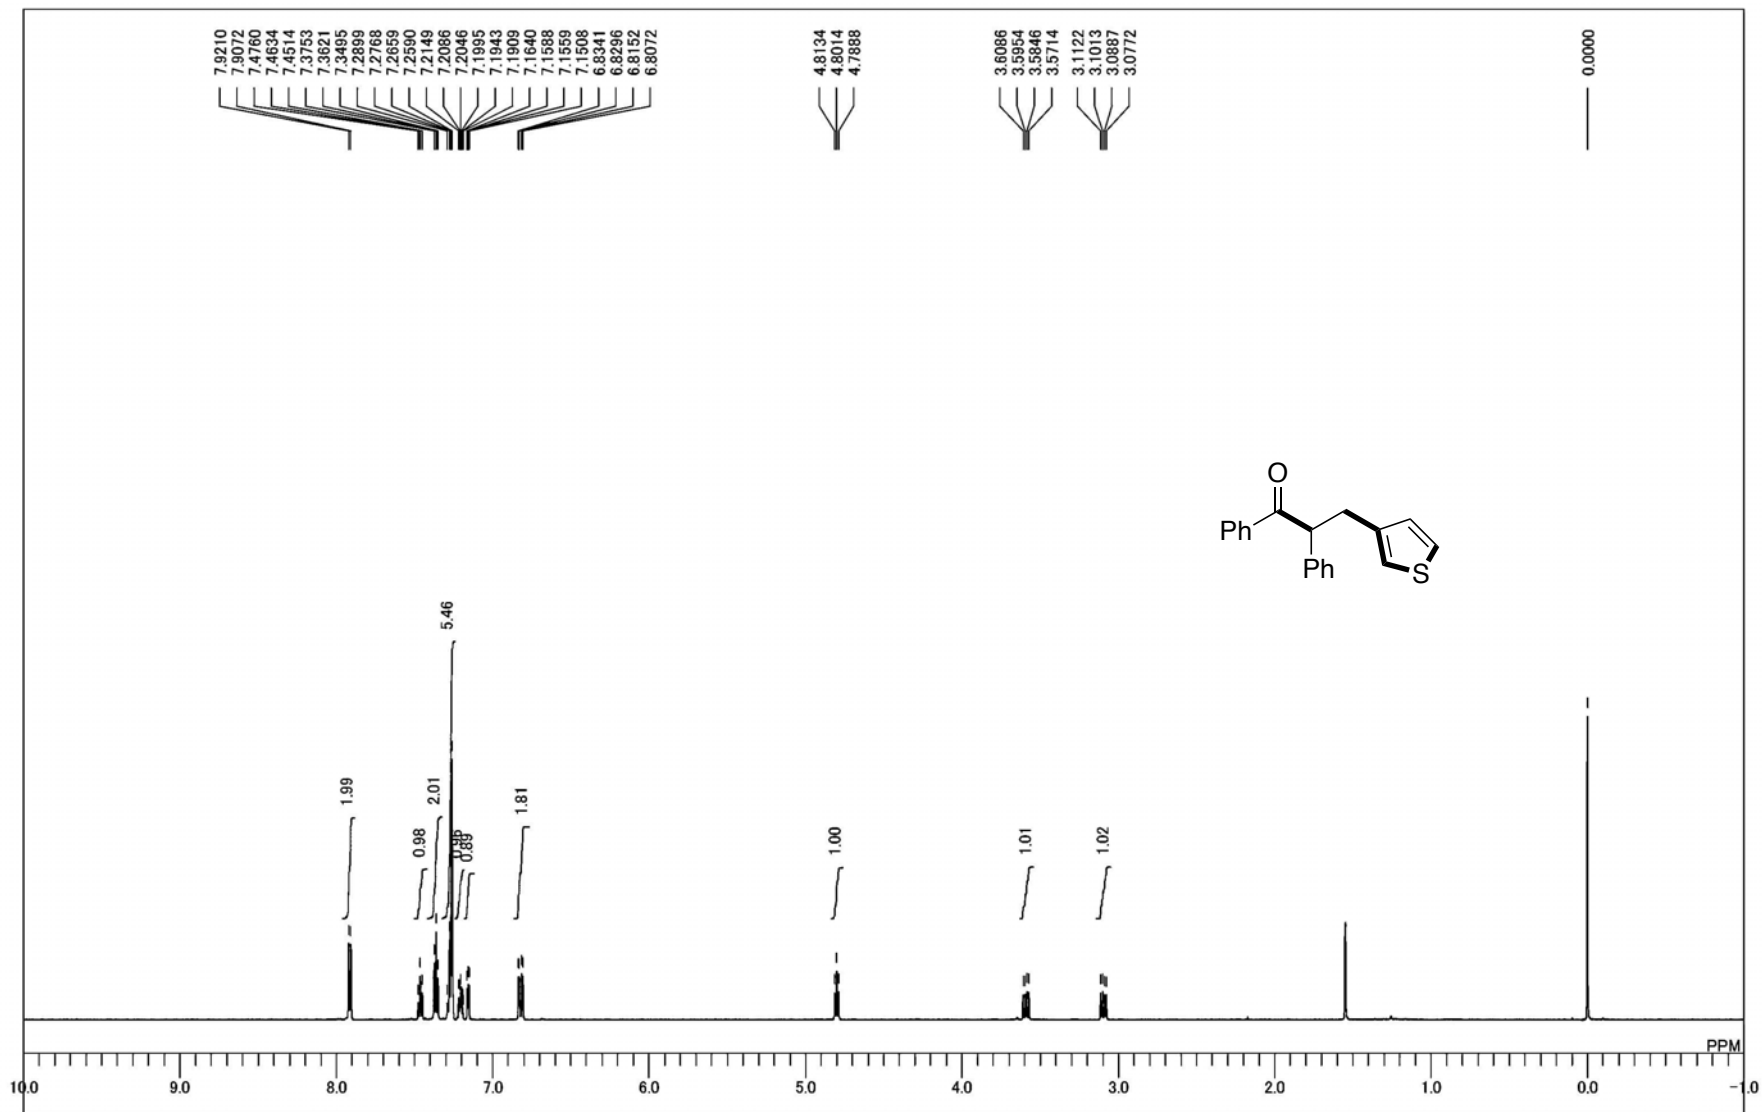

Supplementary Fig. 30 | <sup>1</sup>H NMR spectrum of 6aah

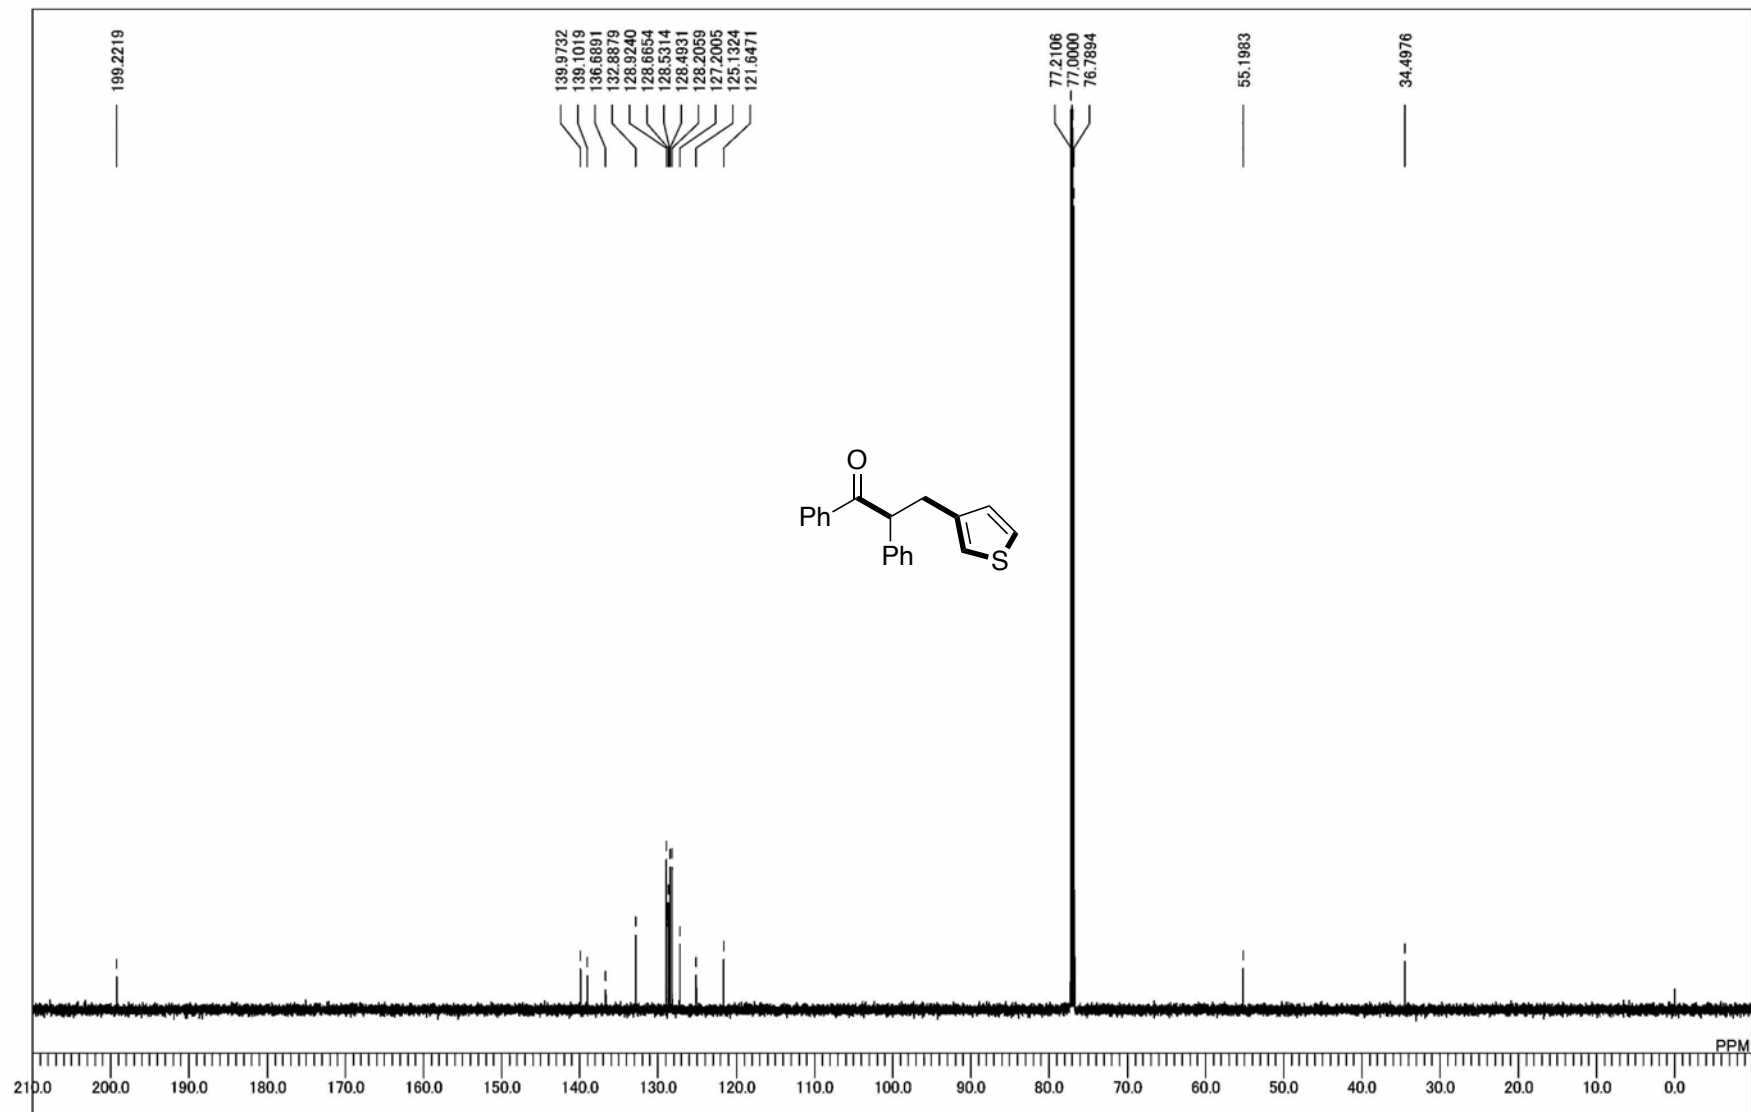

Supplementary Fig. 31 | <sup>13</sup>C NMR spectrum of 6aah



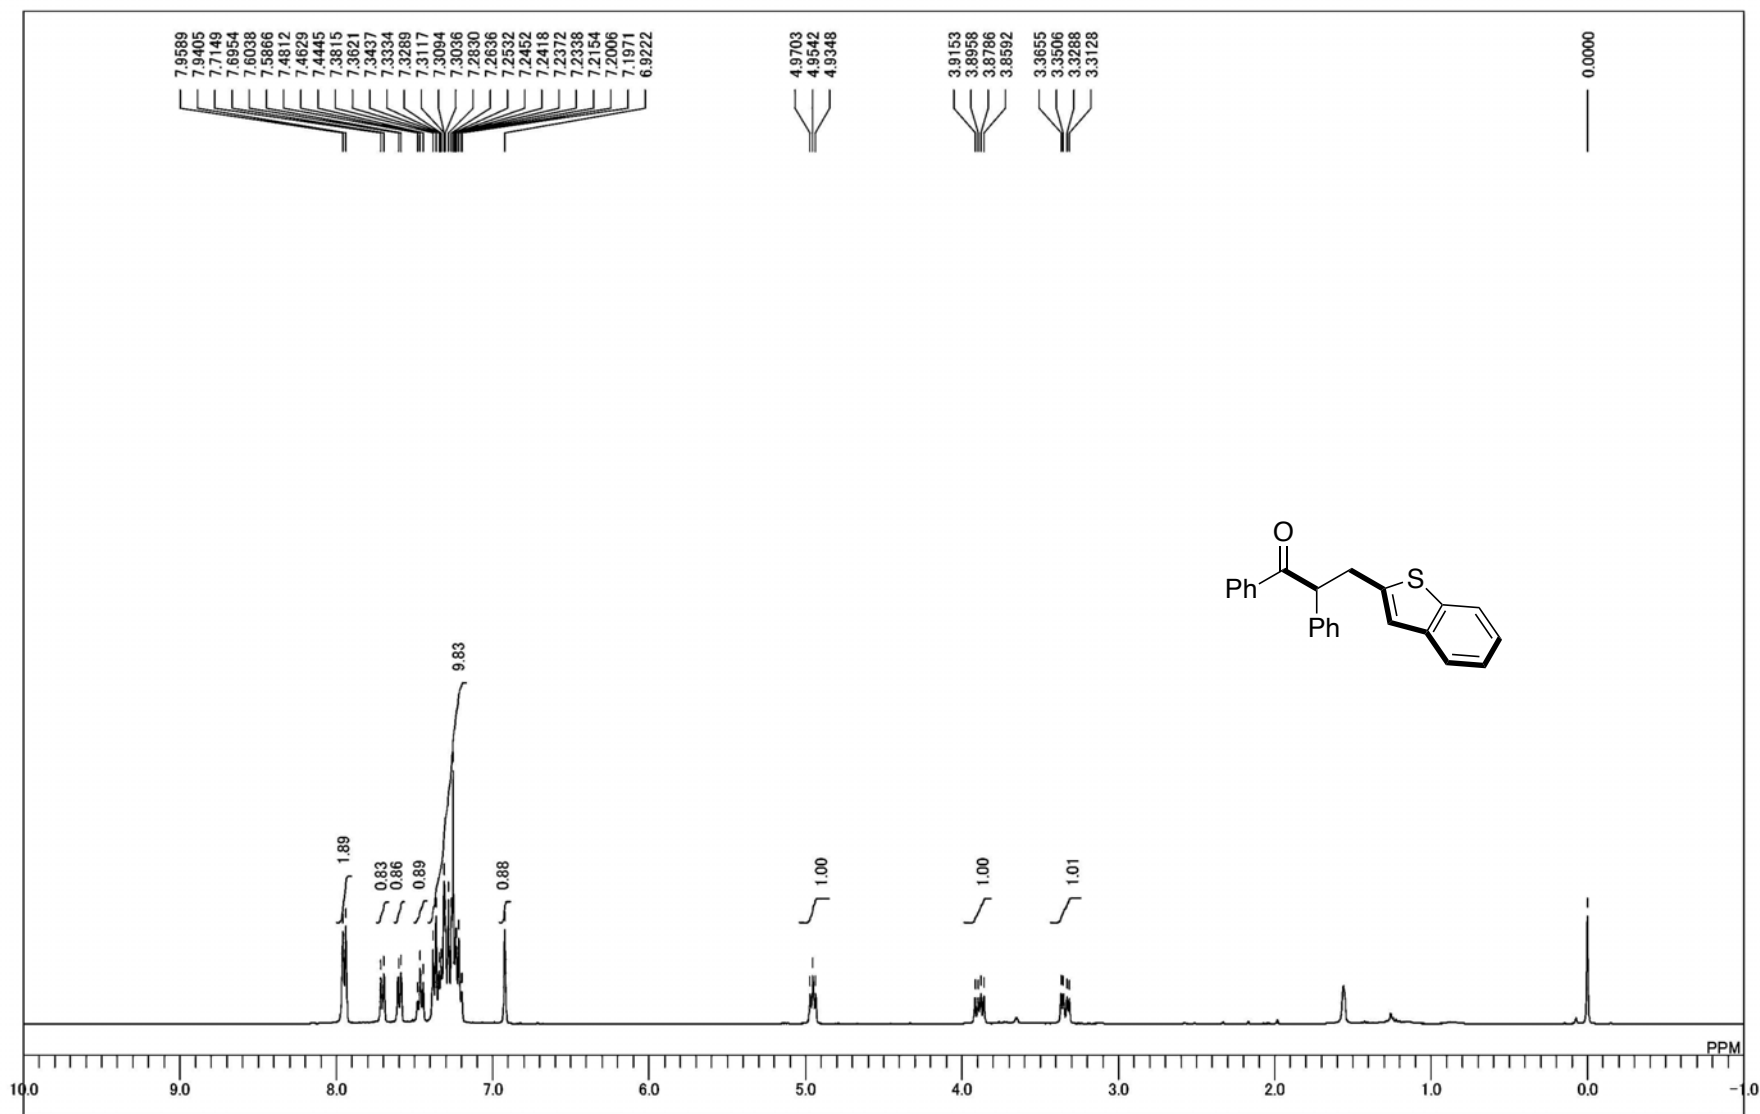

Supplementary Fig. 32 | <sup>1</sup>H NMR spectrum of 6aai

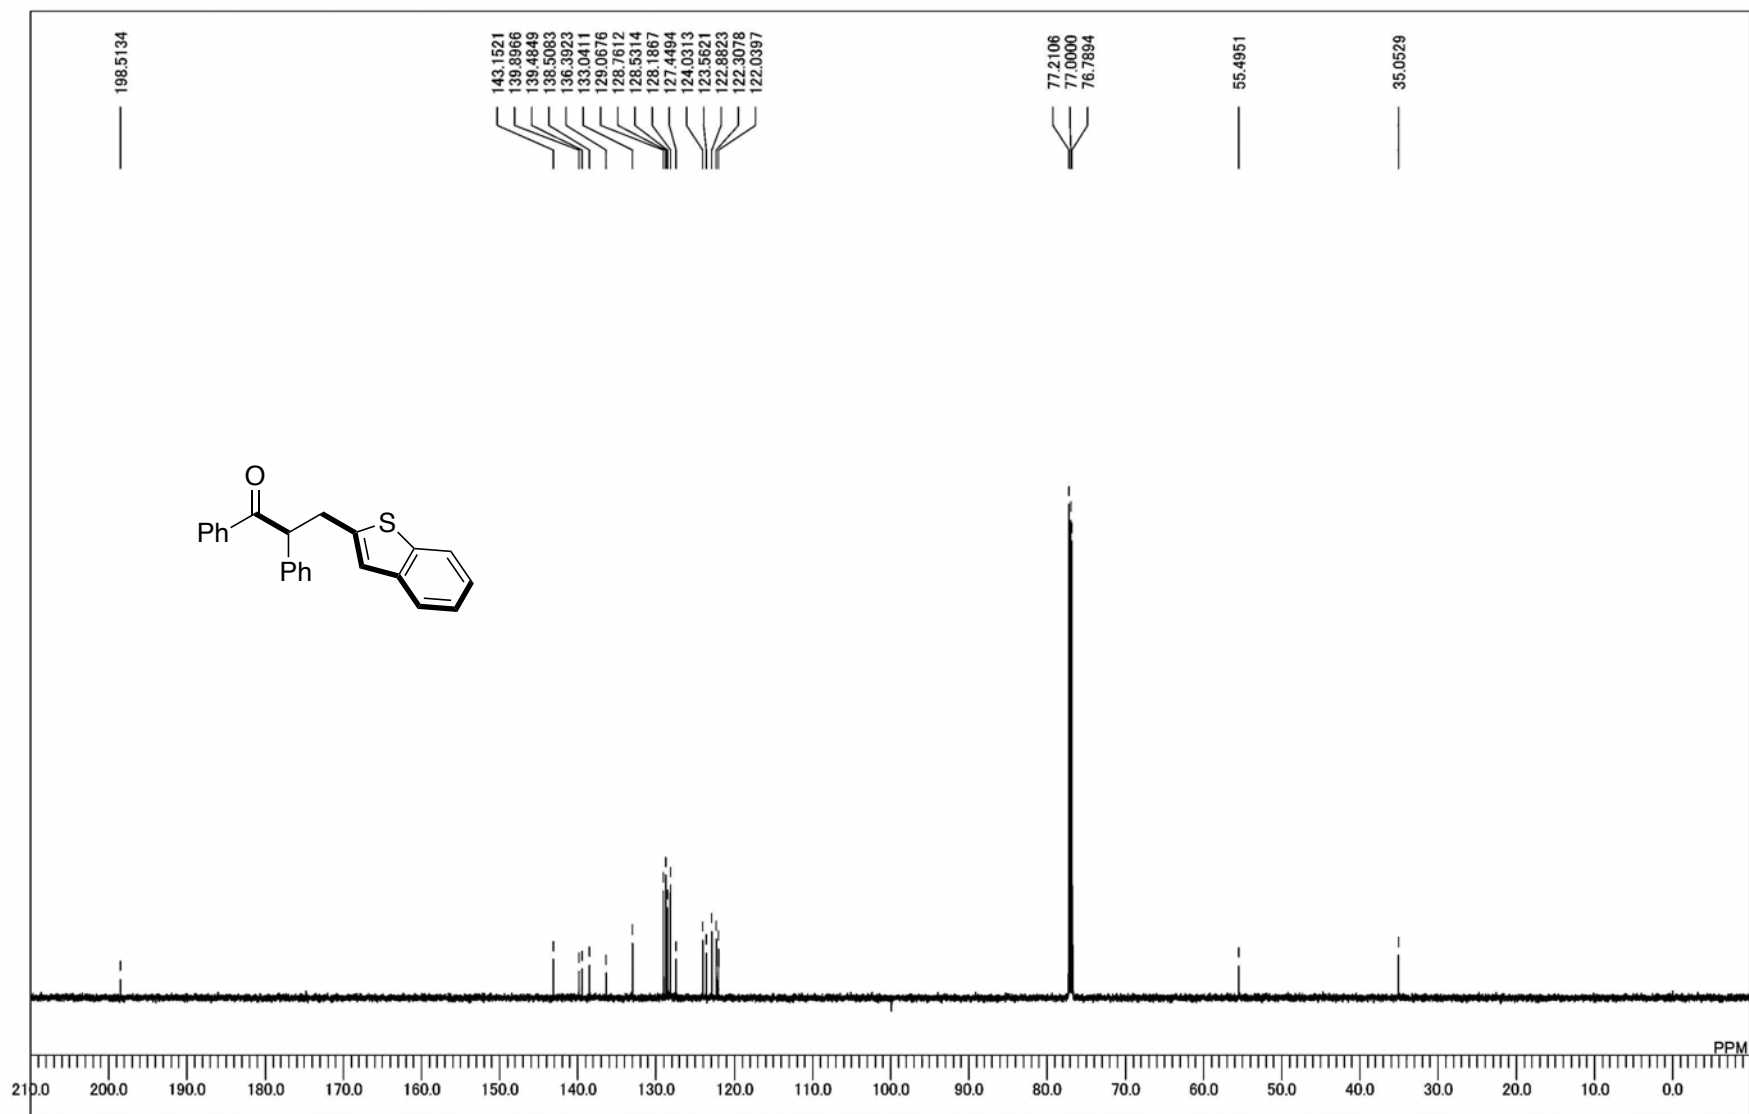

Supplementary Fig. 33 | <sup>13</sup>C NMR spectrum of 6aai

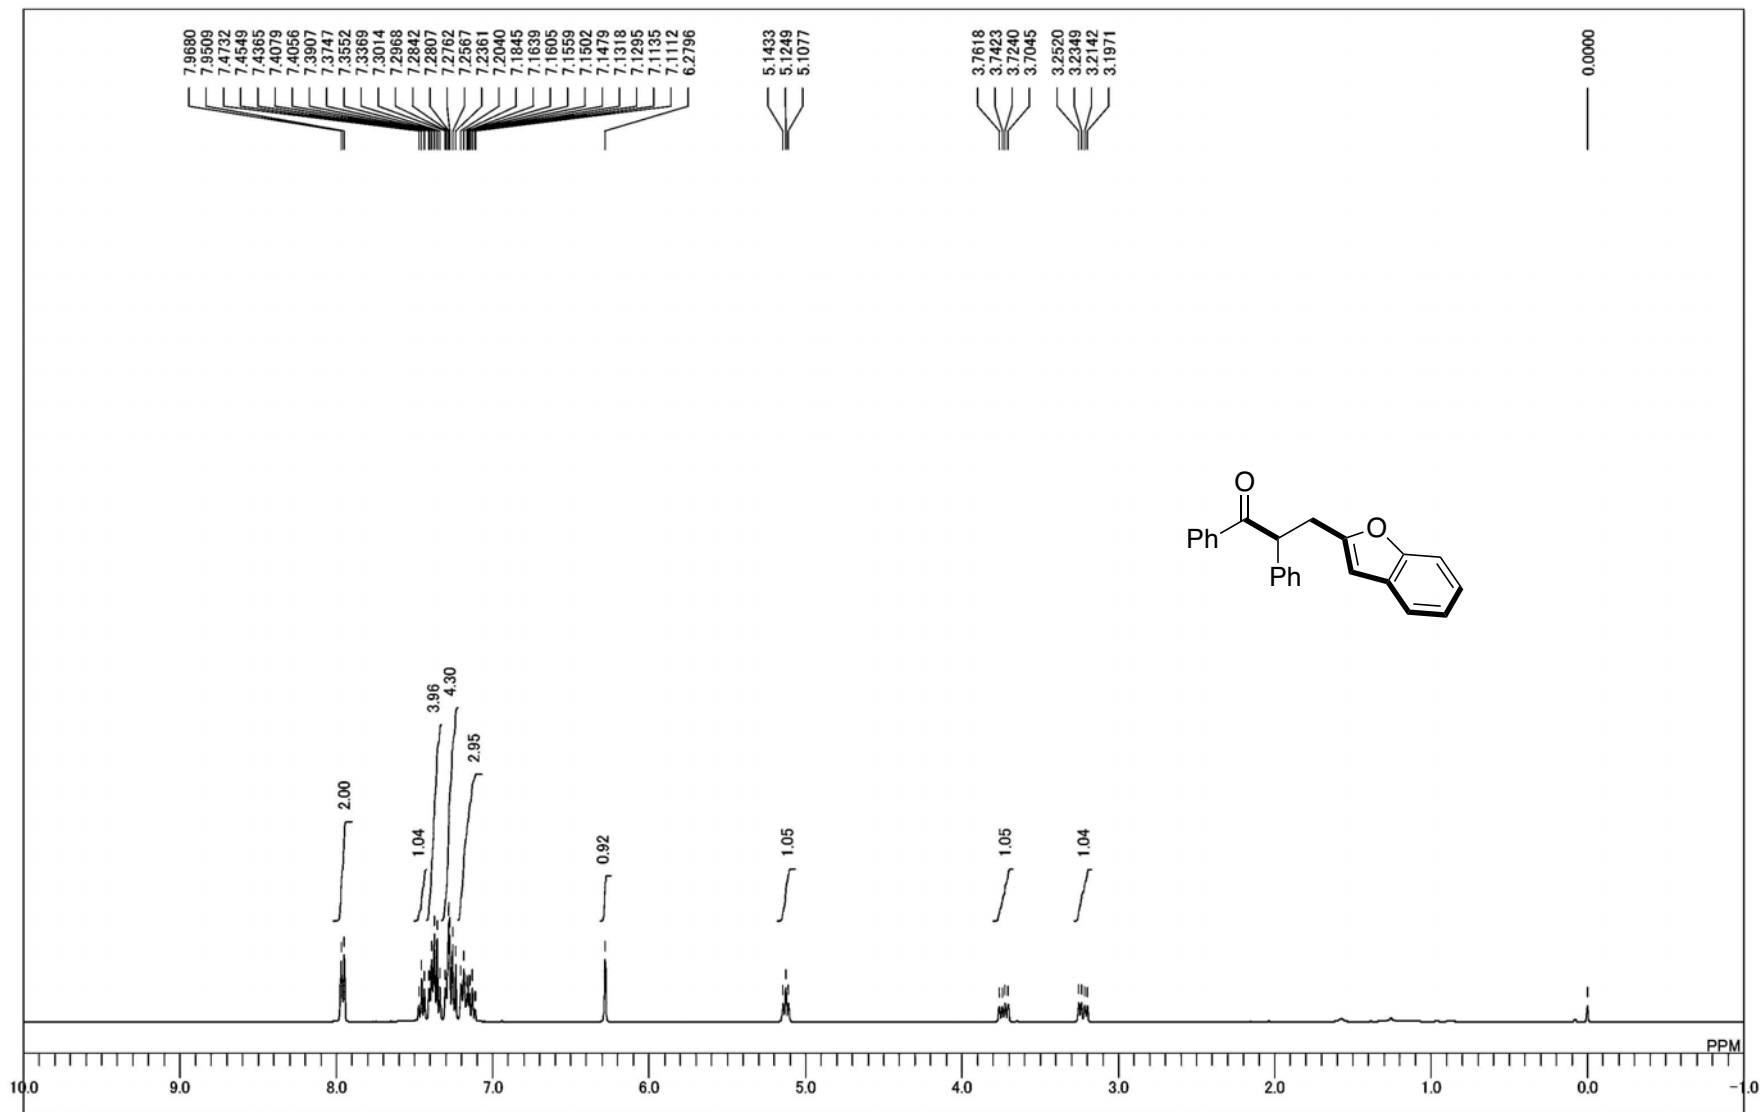

Supplementary Fig. 34 | <sup>1</sup>H NMR spectrum of 6aaj

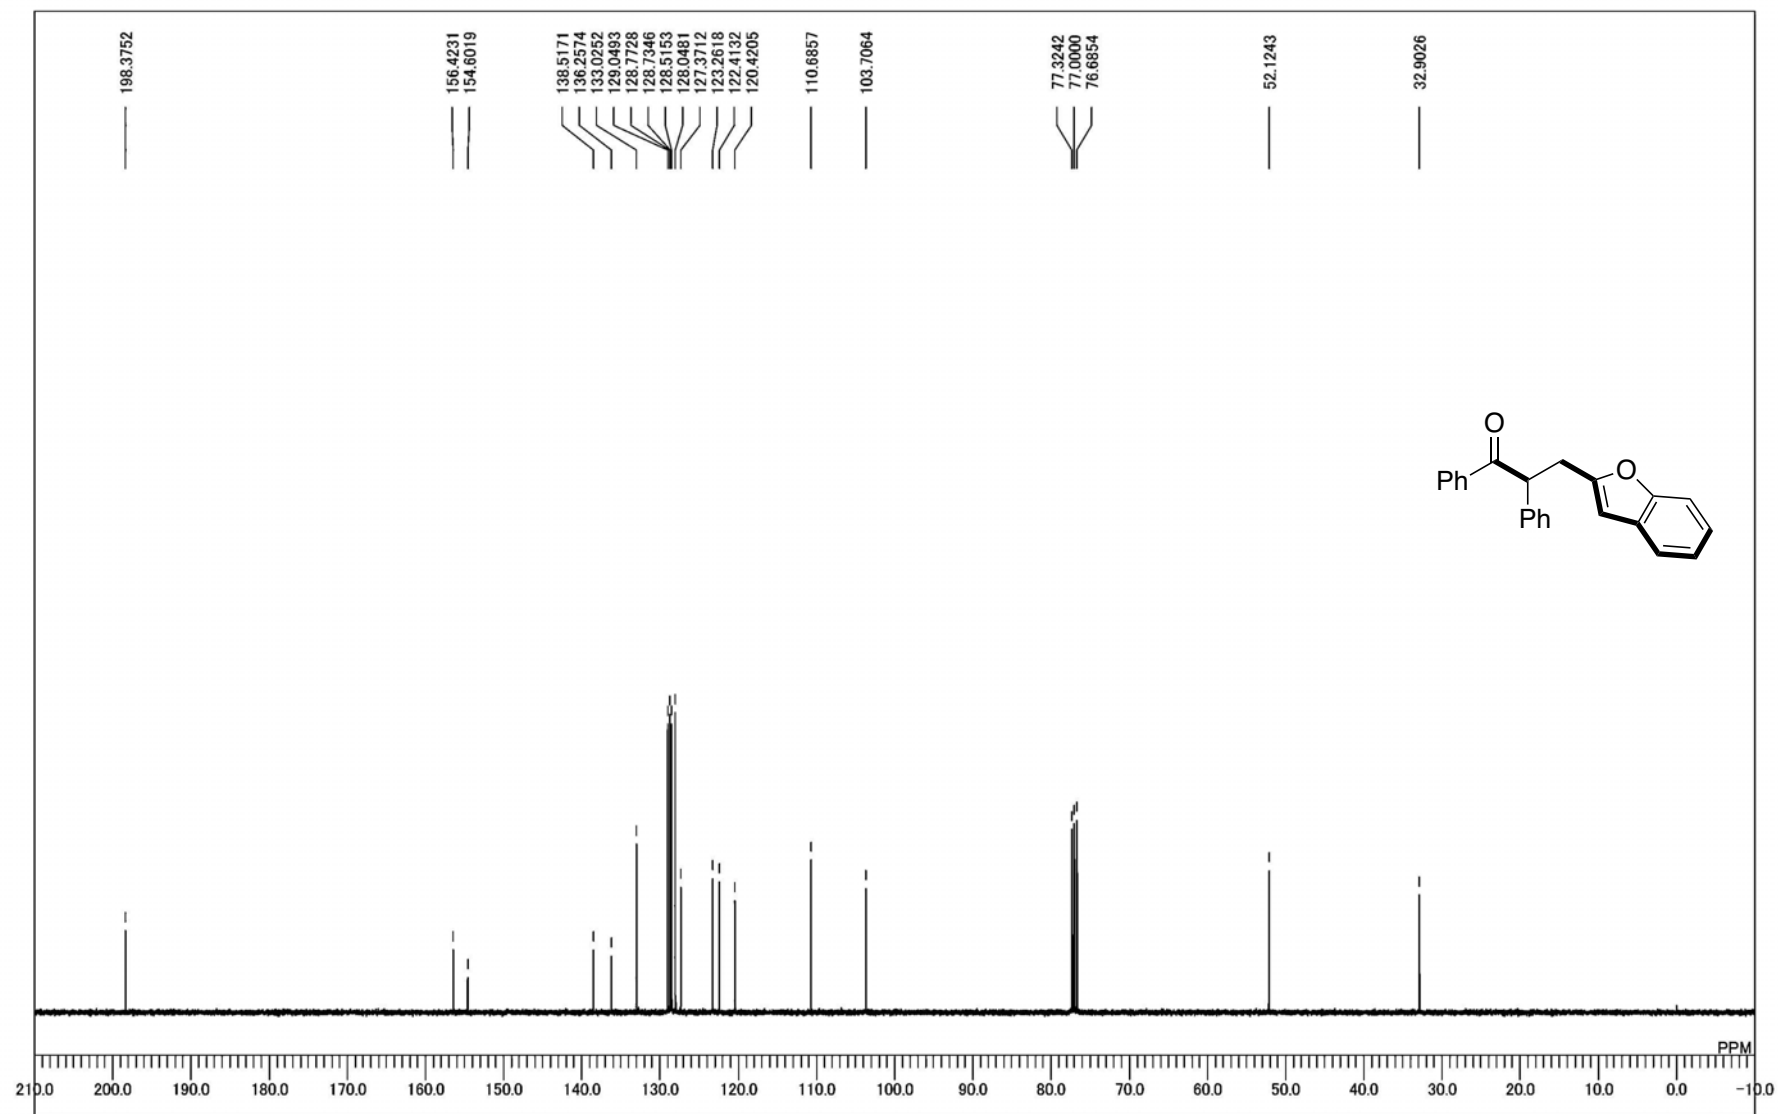

Supplementary Fig. 35 |  $^{13}\text{C}$  NMR spectrum of **6aaj**

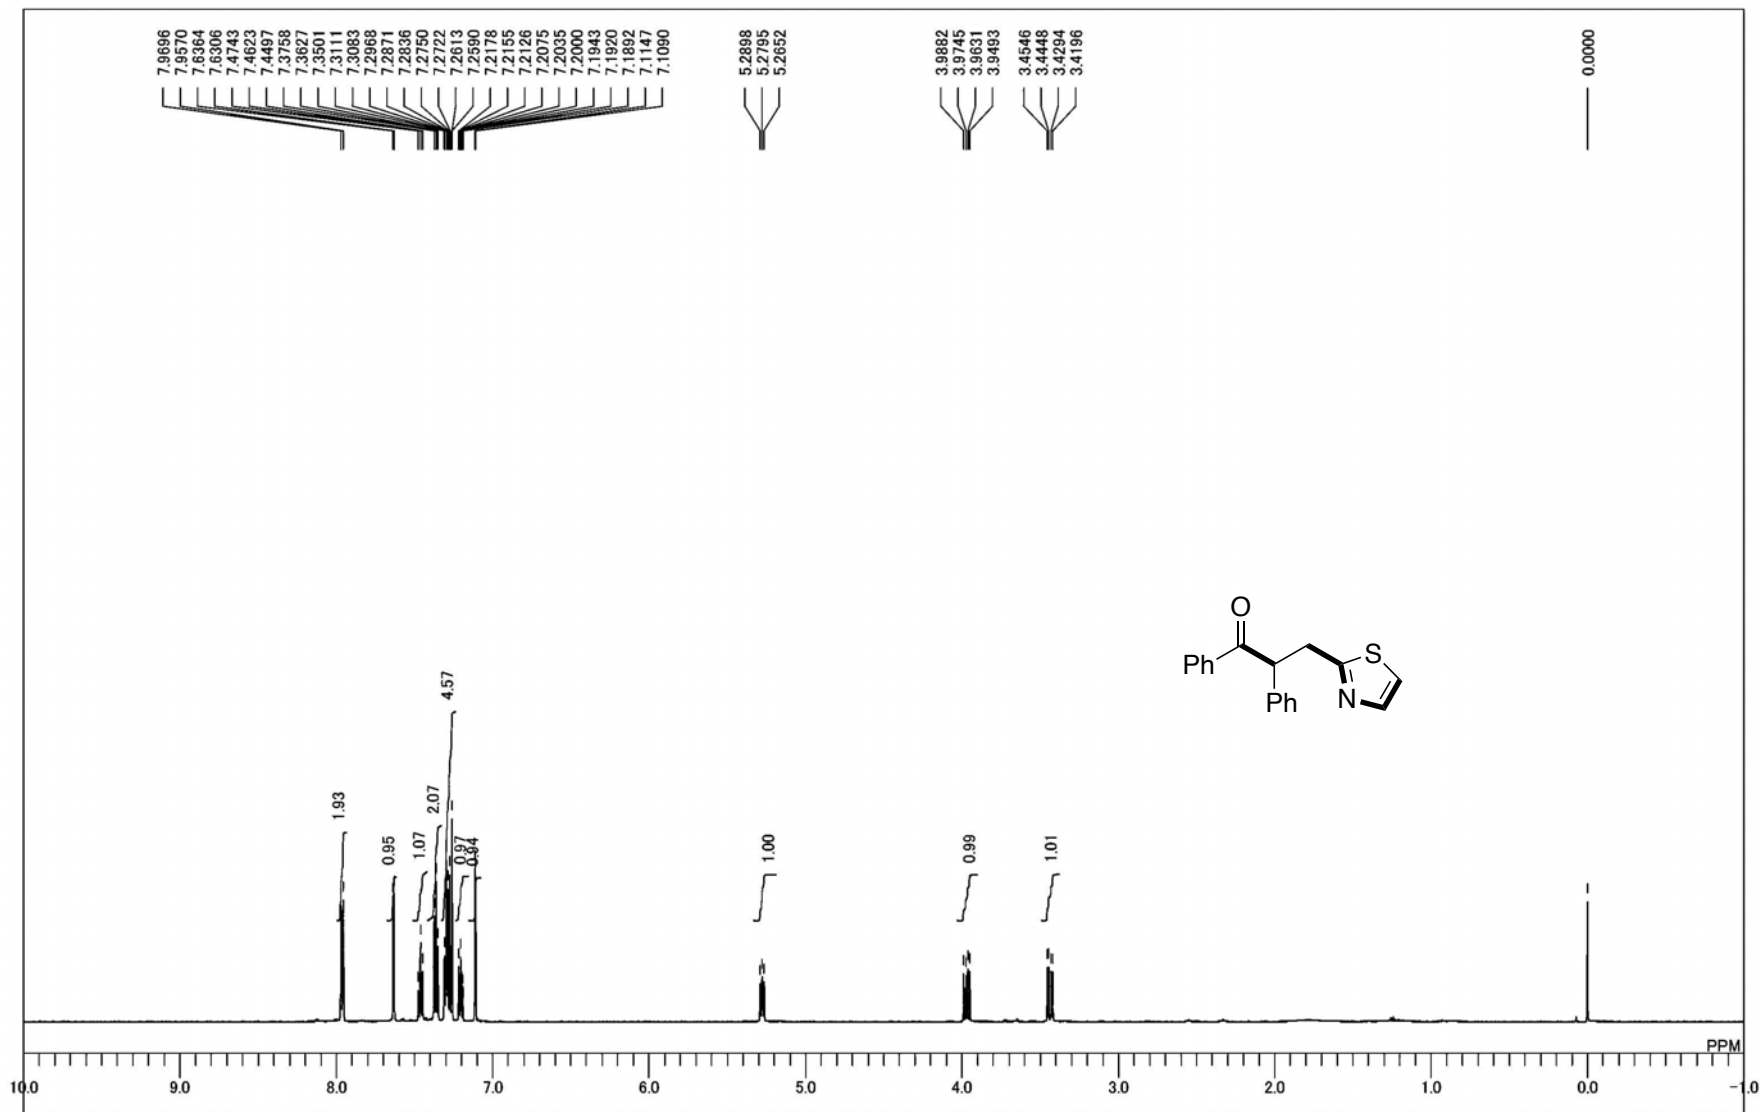

Supplementary Fig. 36 |  $^1\text{H}$  NMR spectrum of 6aak

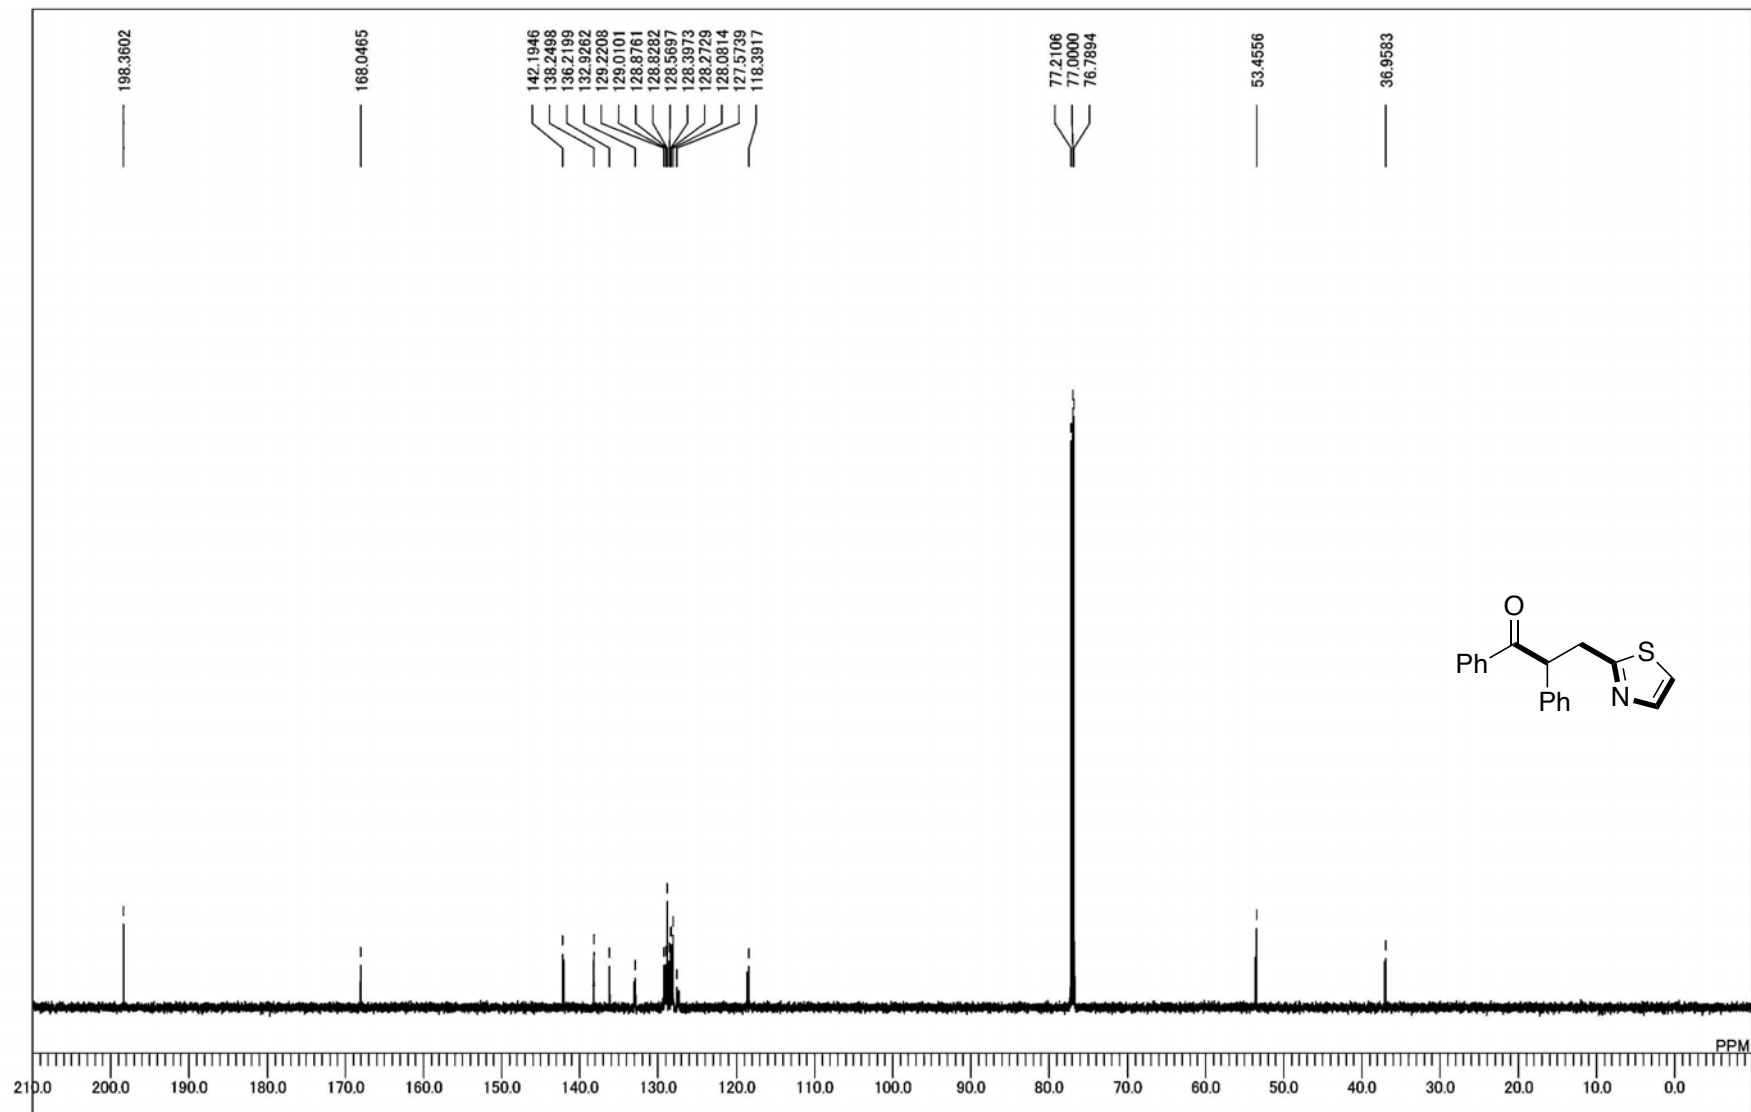

Supplementary Fig. 37 | <sup>13</sup>C NMR spectrum of 6aak

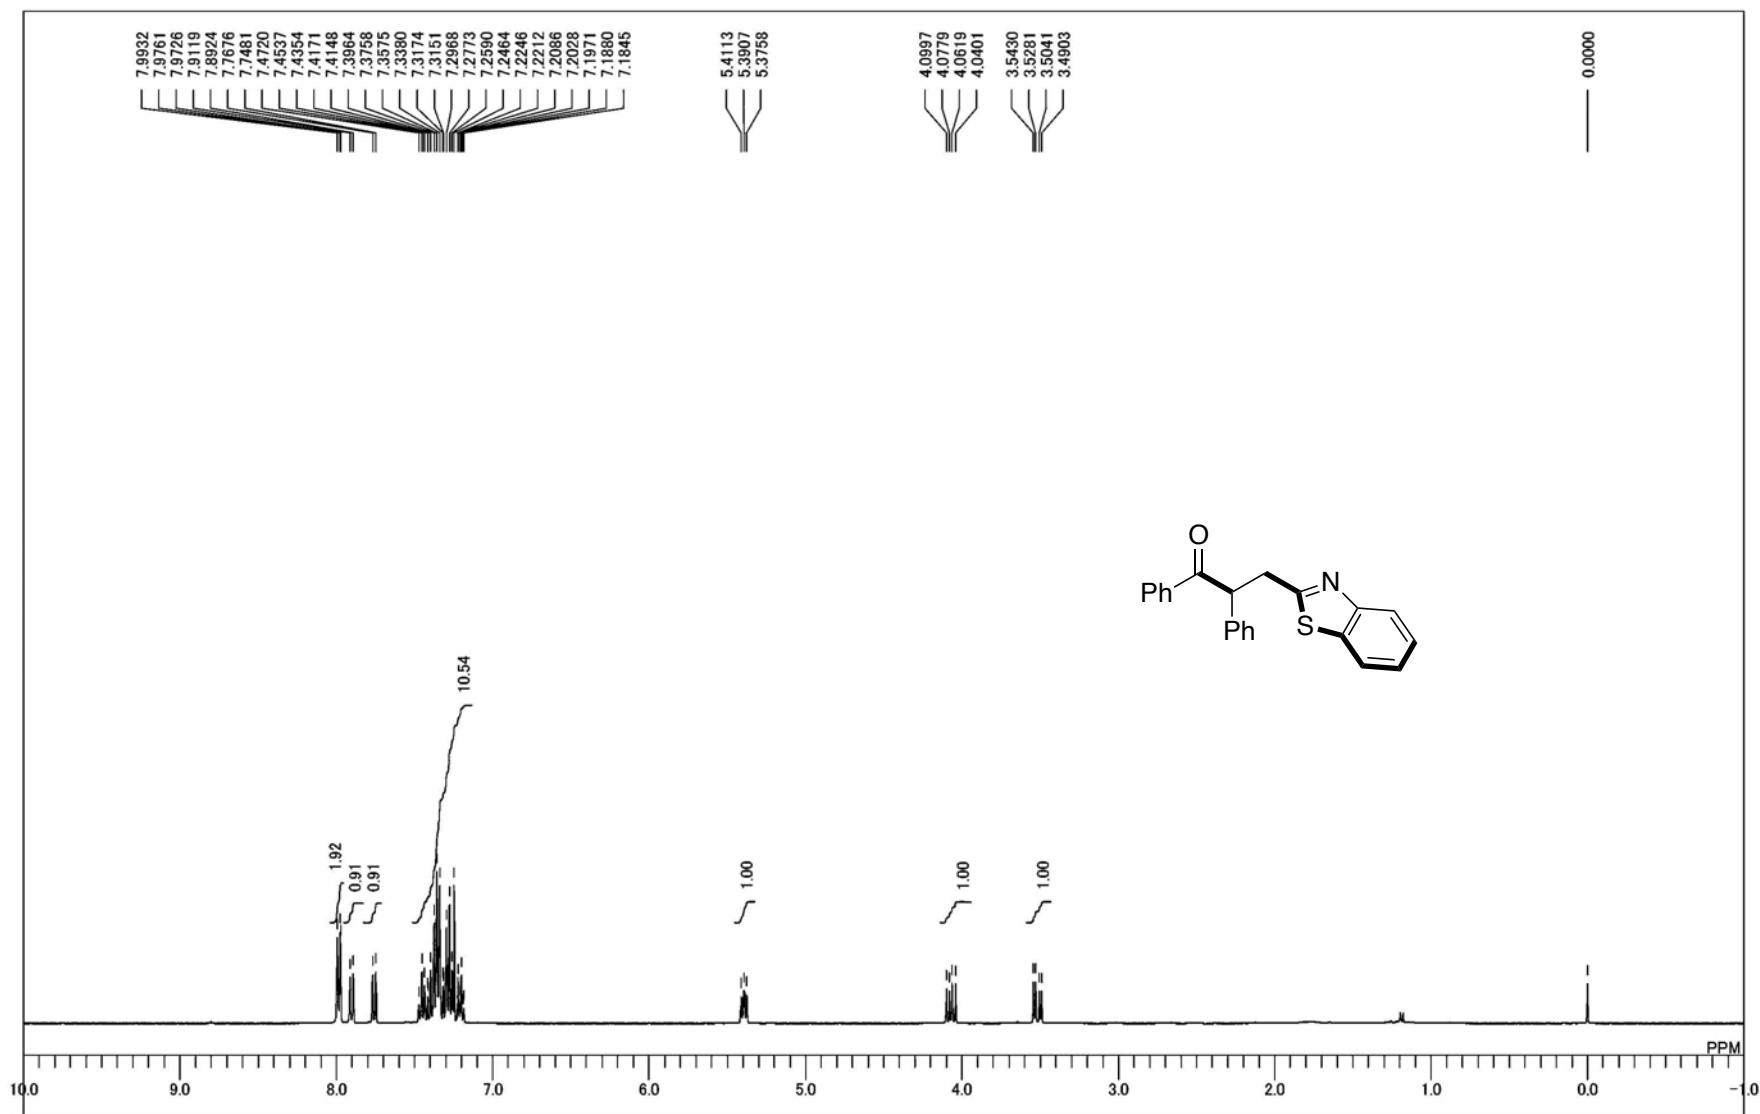

Supplementary Fig. 38 | <sup>1</sup>H NMR spectrum of 6aal

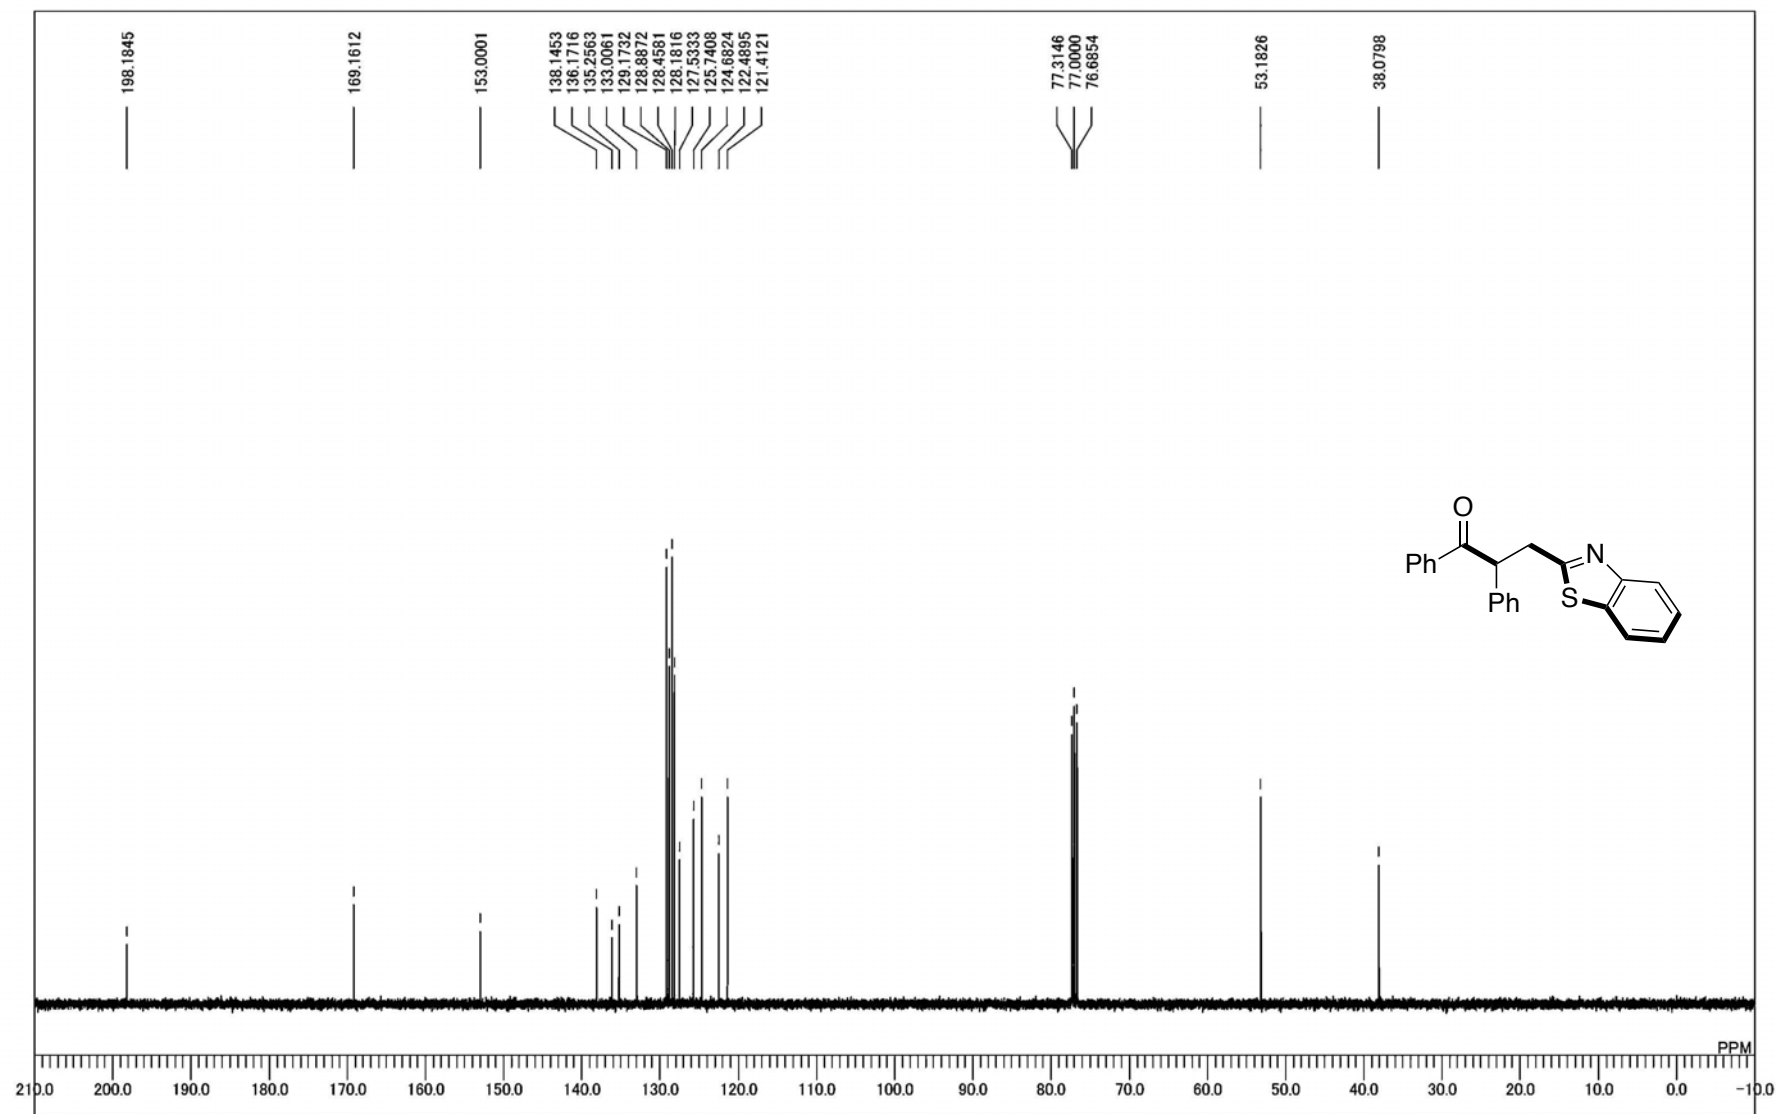

Supplementary Fig. 39 |  $^{13}\text{C}$  NMR spectrum of **6aal**



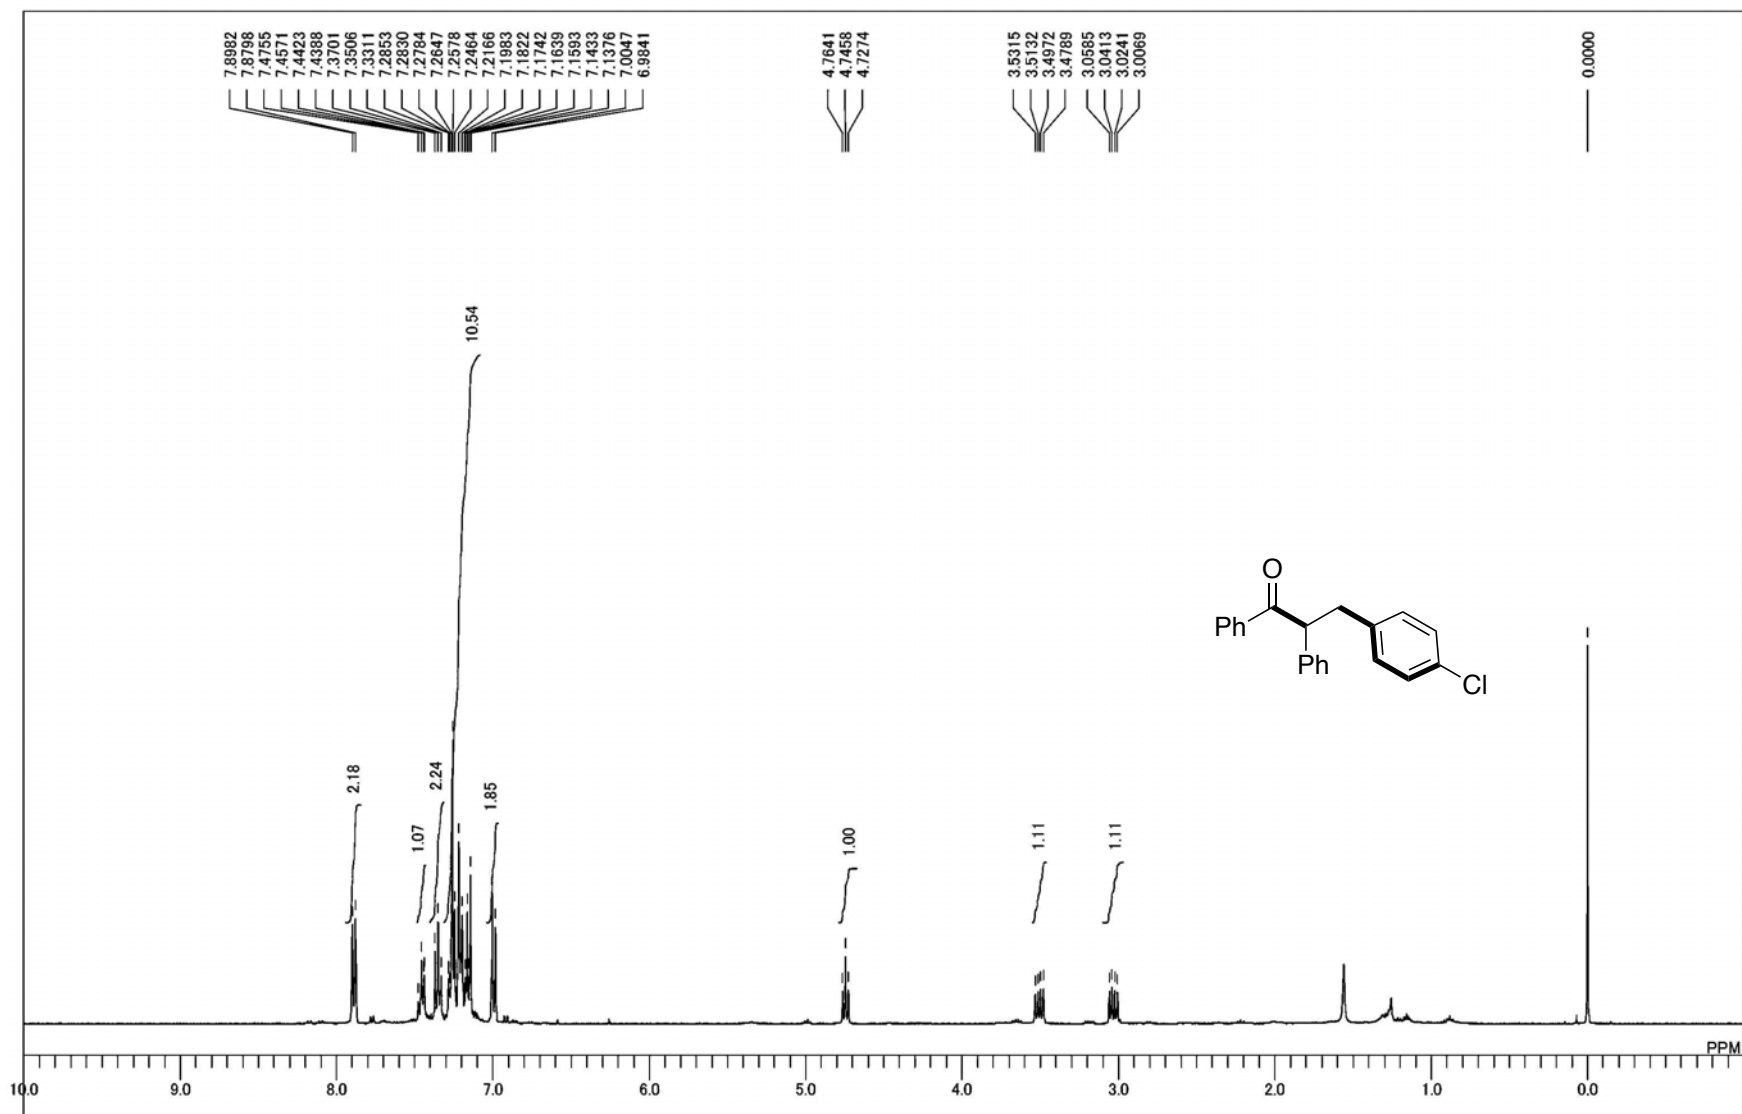

Supplementary Fig. 40 | <sup>1</sup>H NMR spectrum of 6aam

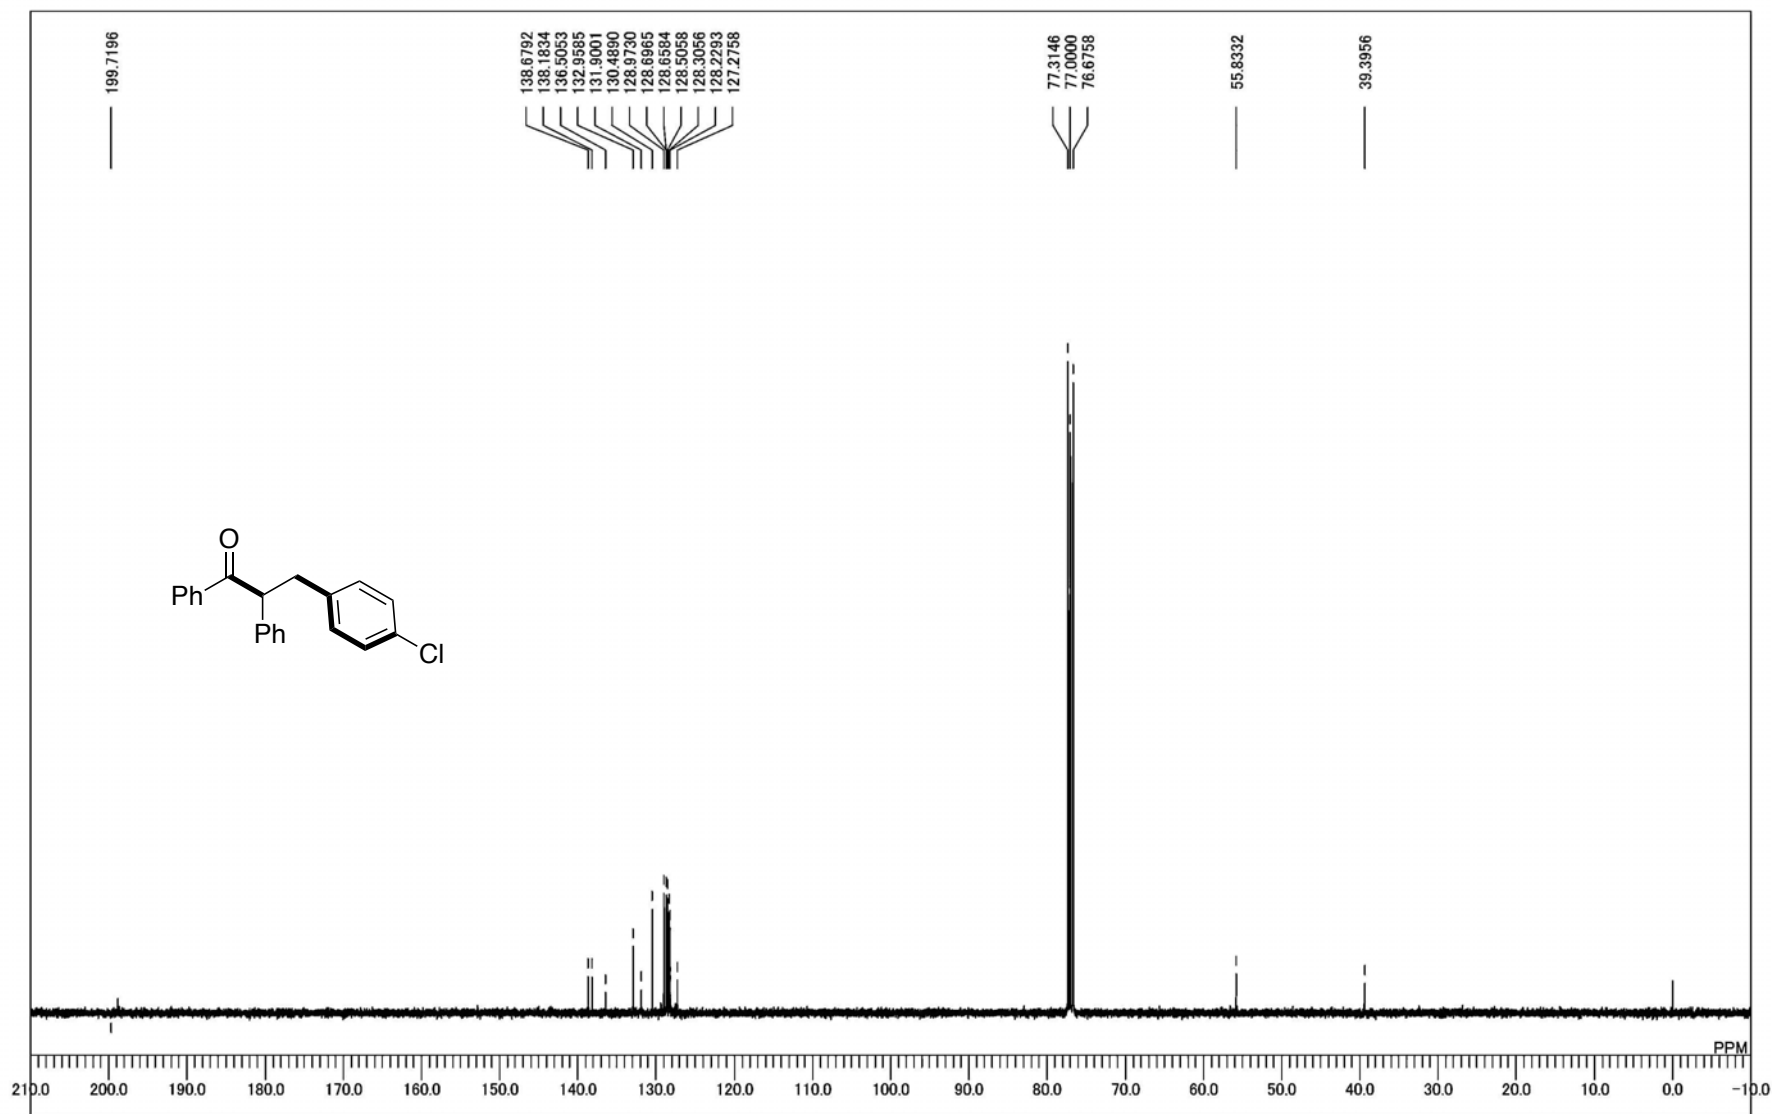

Supplementary Fig. 41 | <sup>13</sup>C NMR spectrum of 6aam

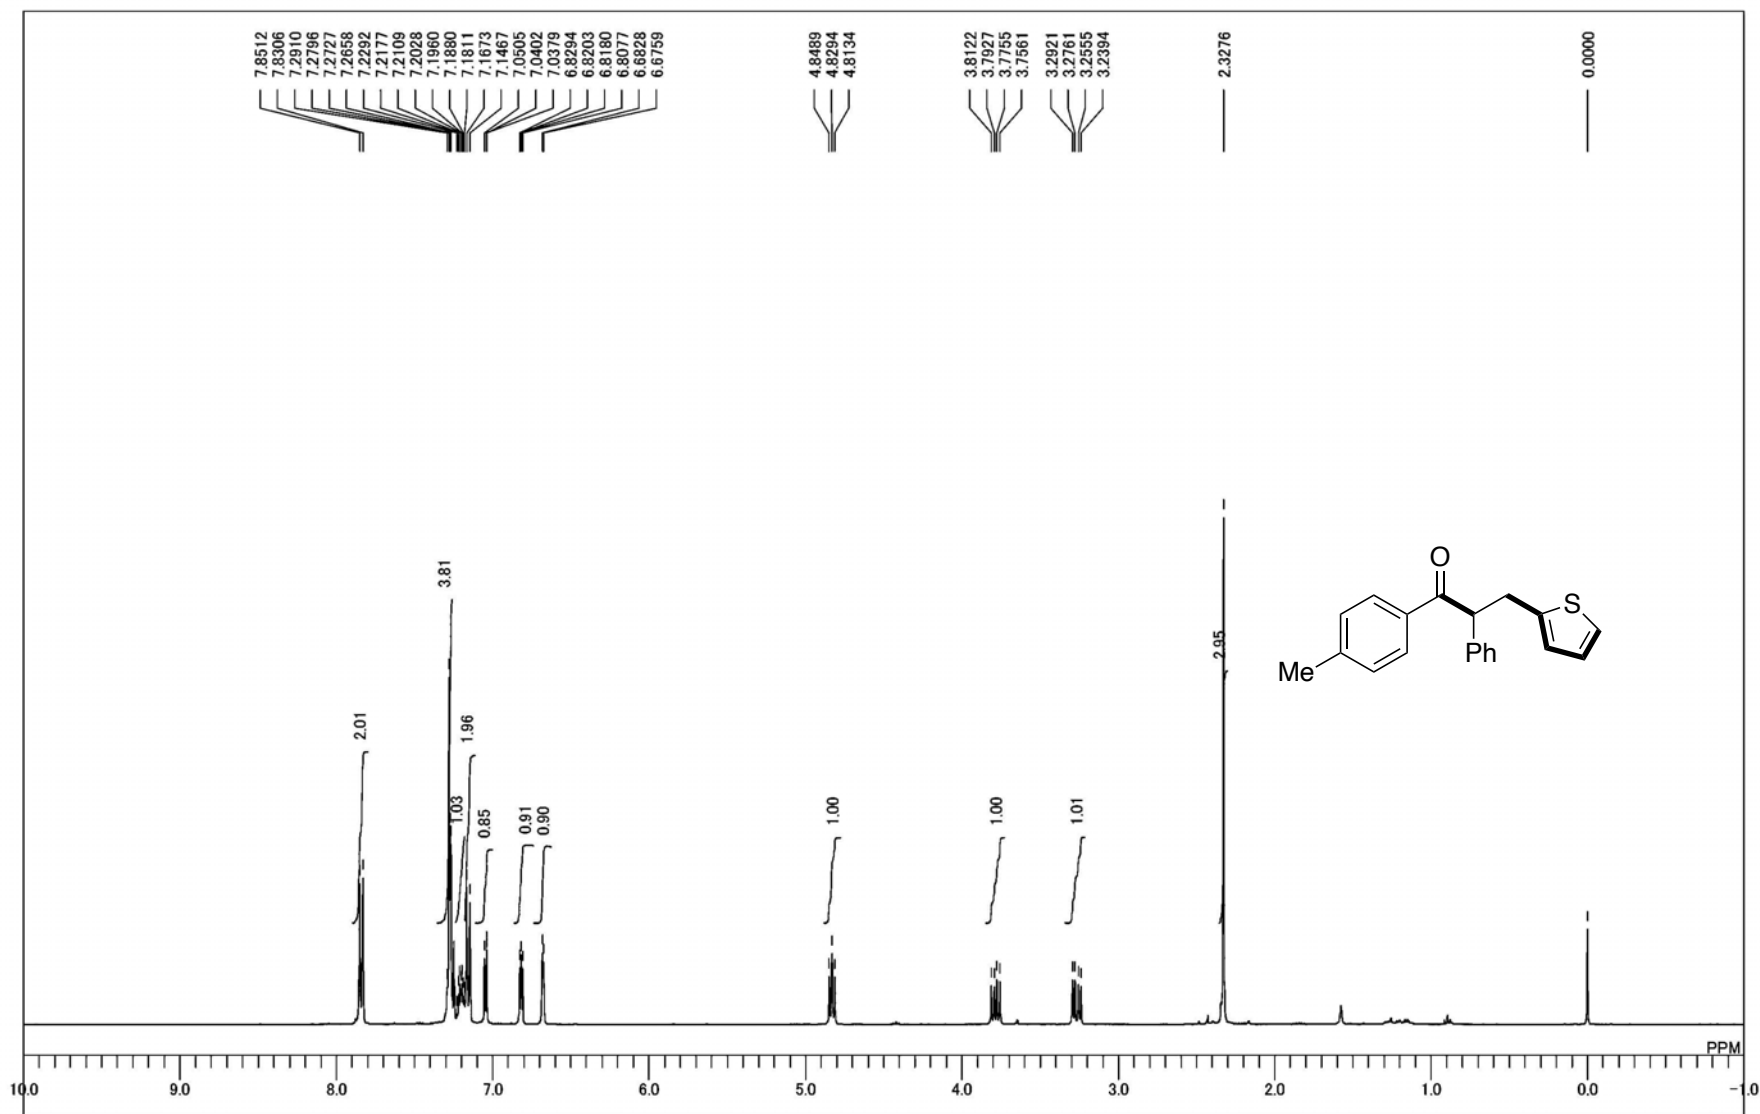

Supplementary Fig. 42 | <sup>1</sup>H NMR spectrum of 6bag

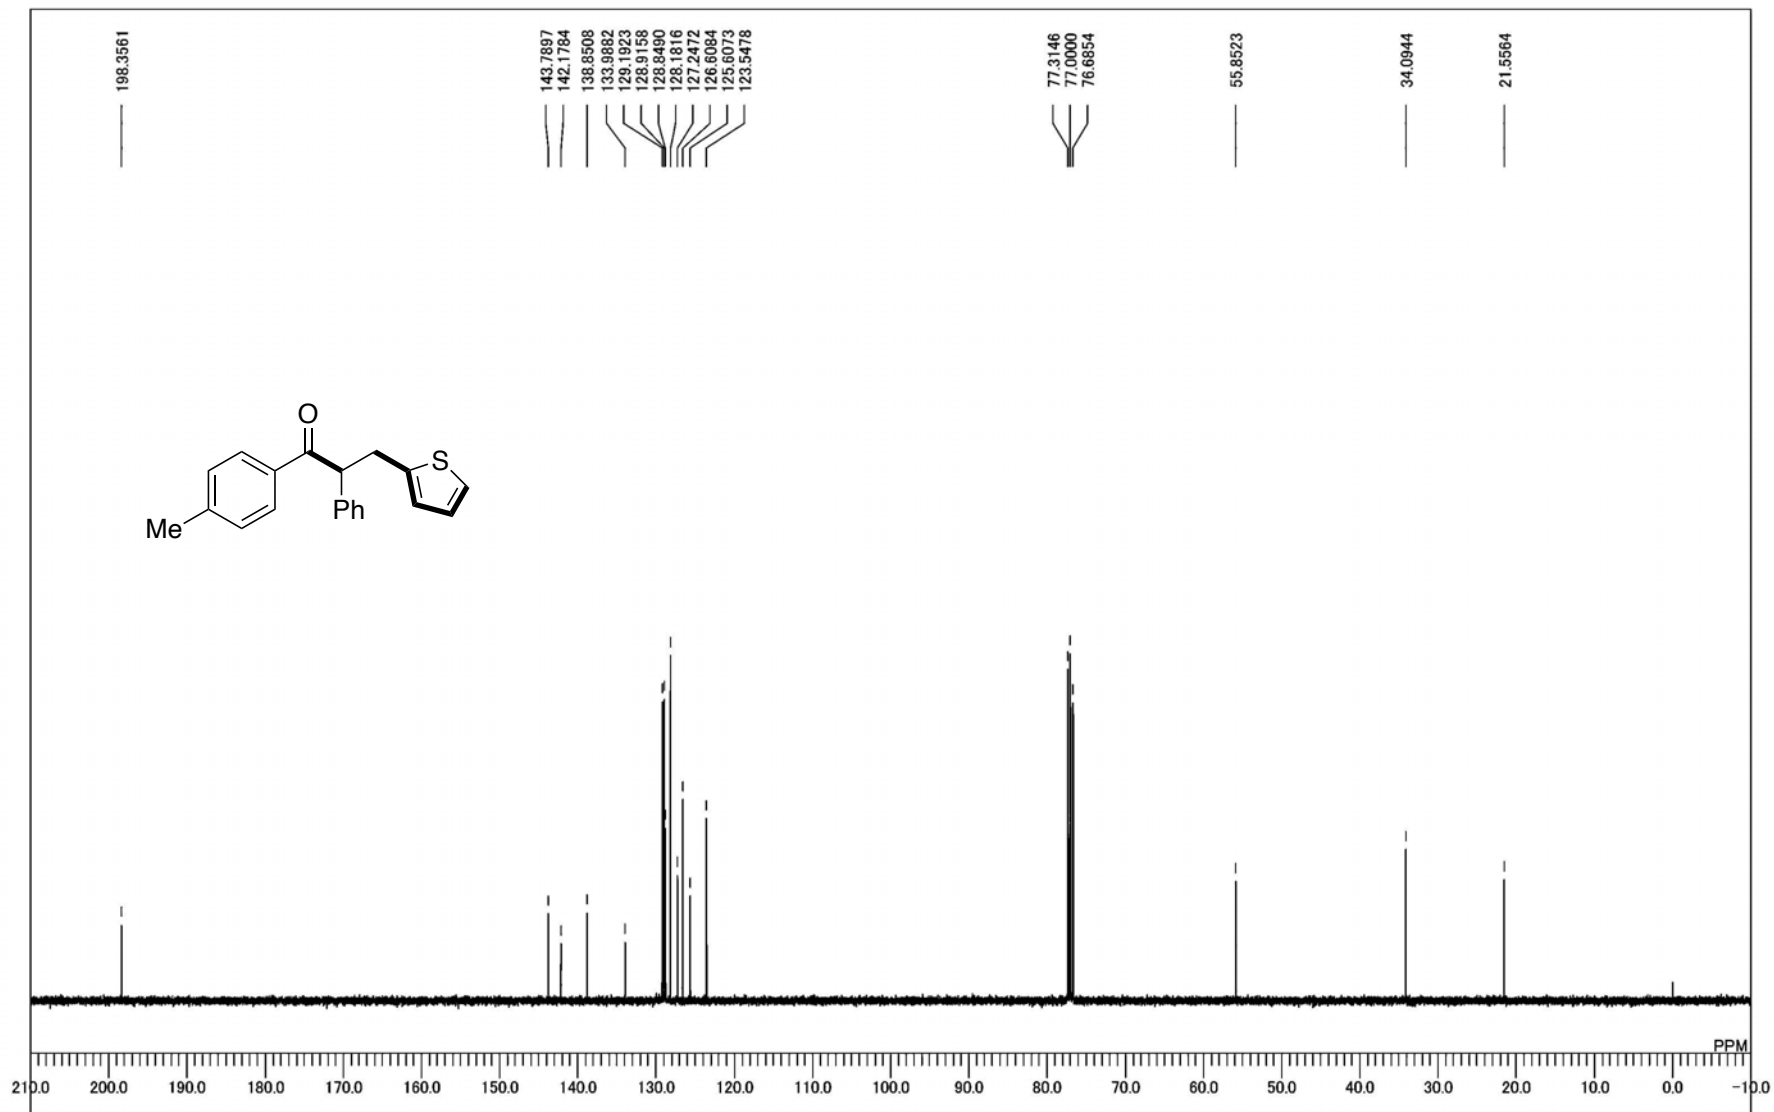

Supplementary Fig. 43 | <sup>13</sup>C NMR spectrum of 6bag

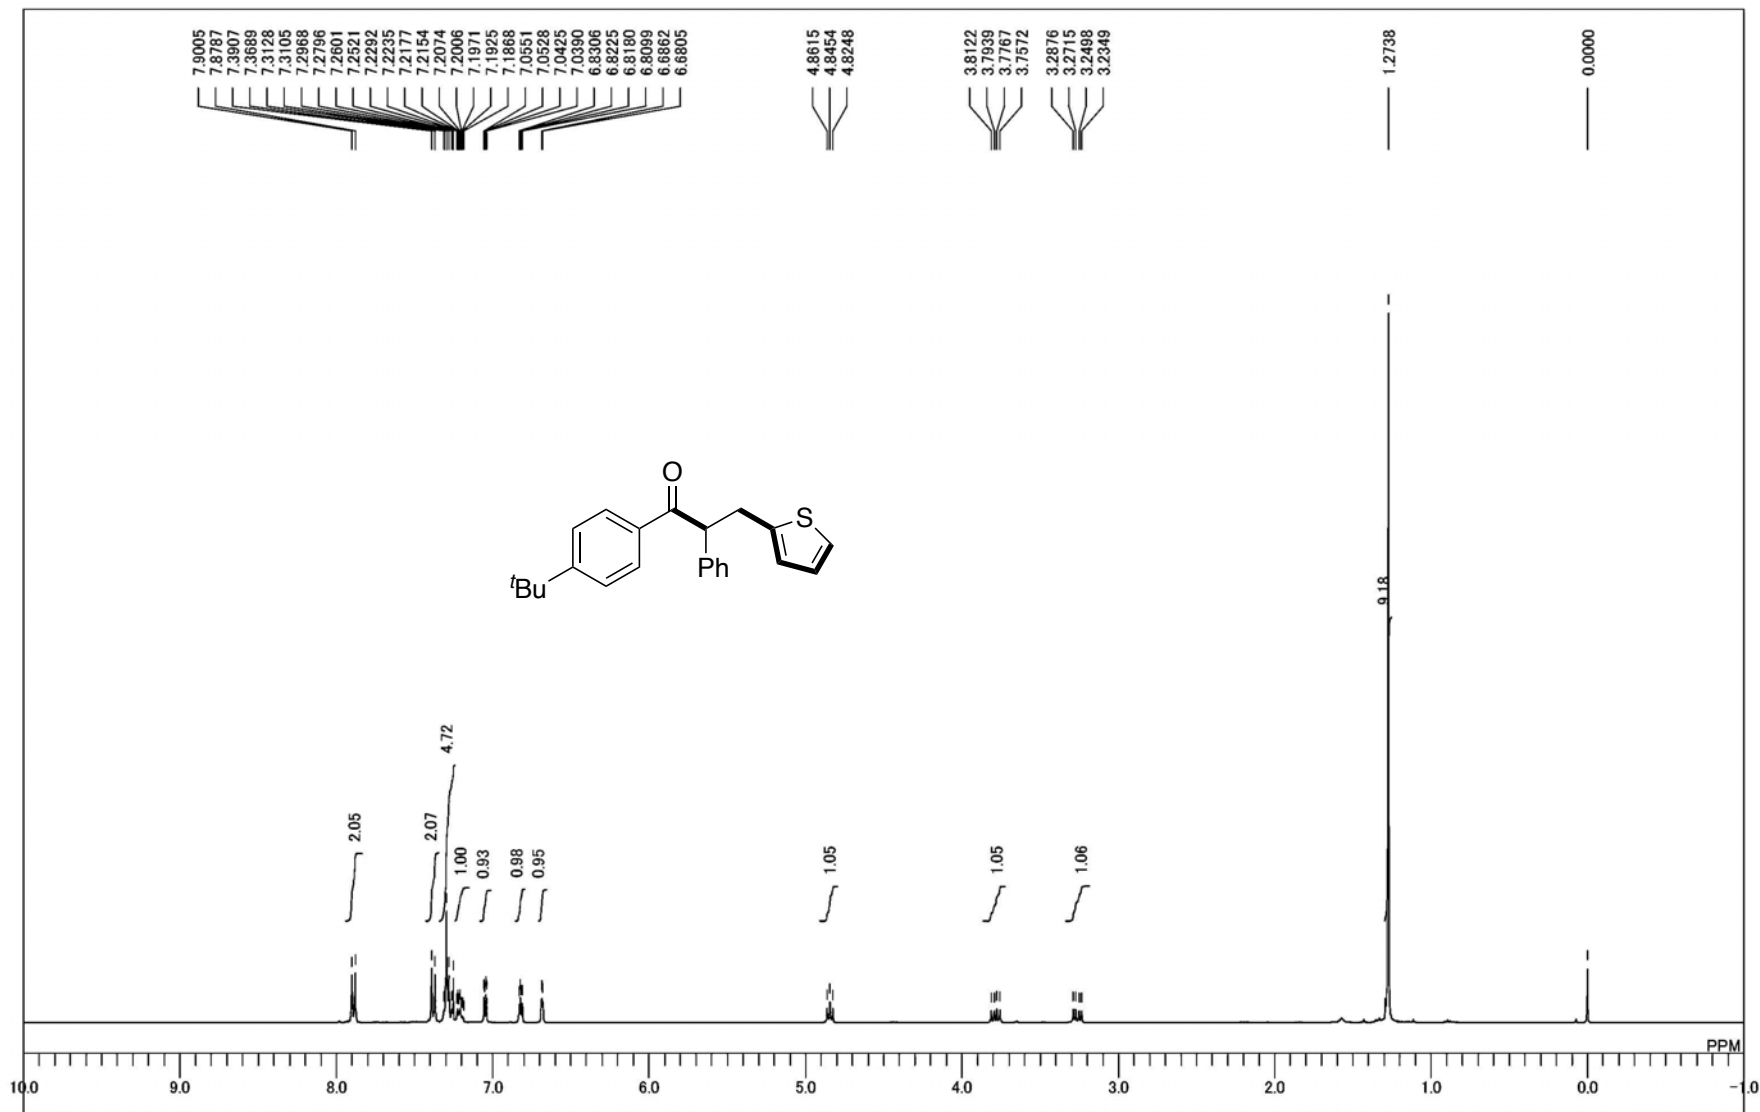

Supplementary Fig. 44 | <sup>1</sup>H NMR spectrum of 6cag

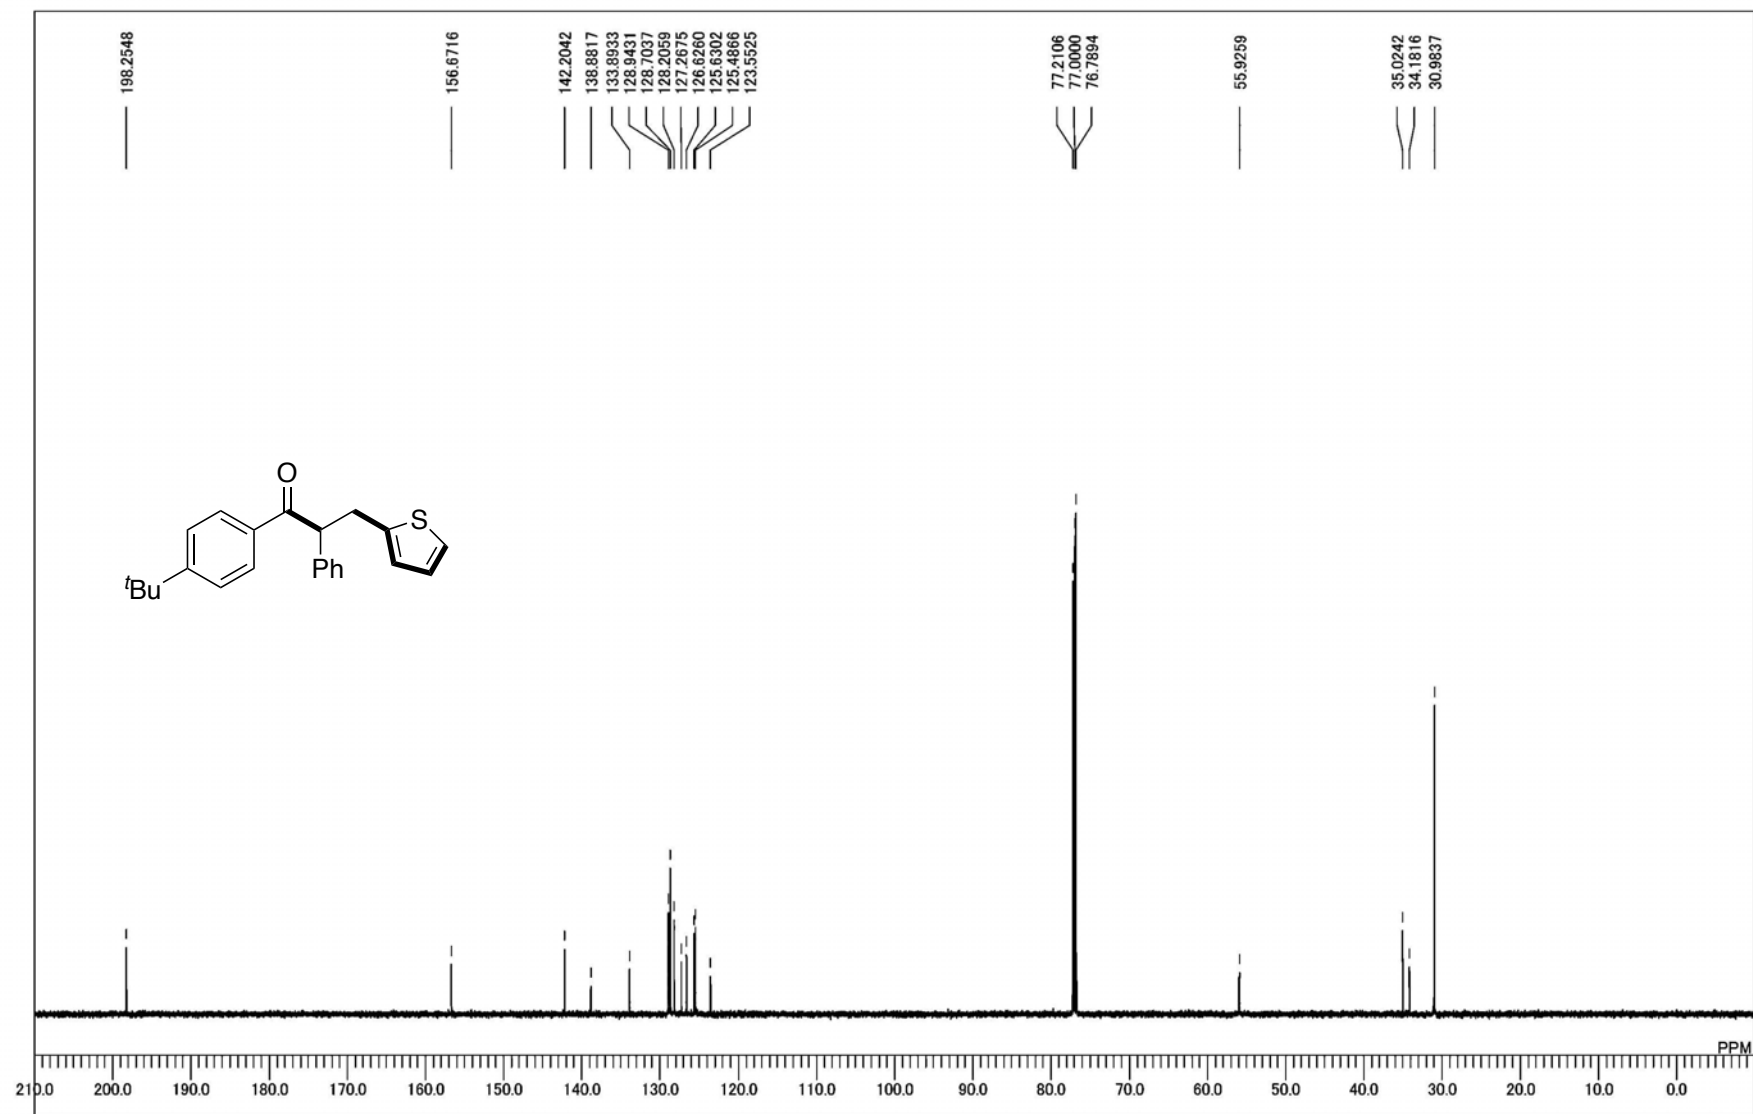

Supplementary Fig. 45 | <sup>13</sup>C NMR spectrum of 6cag

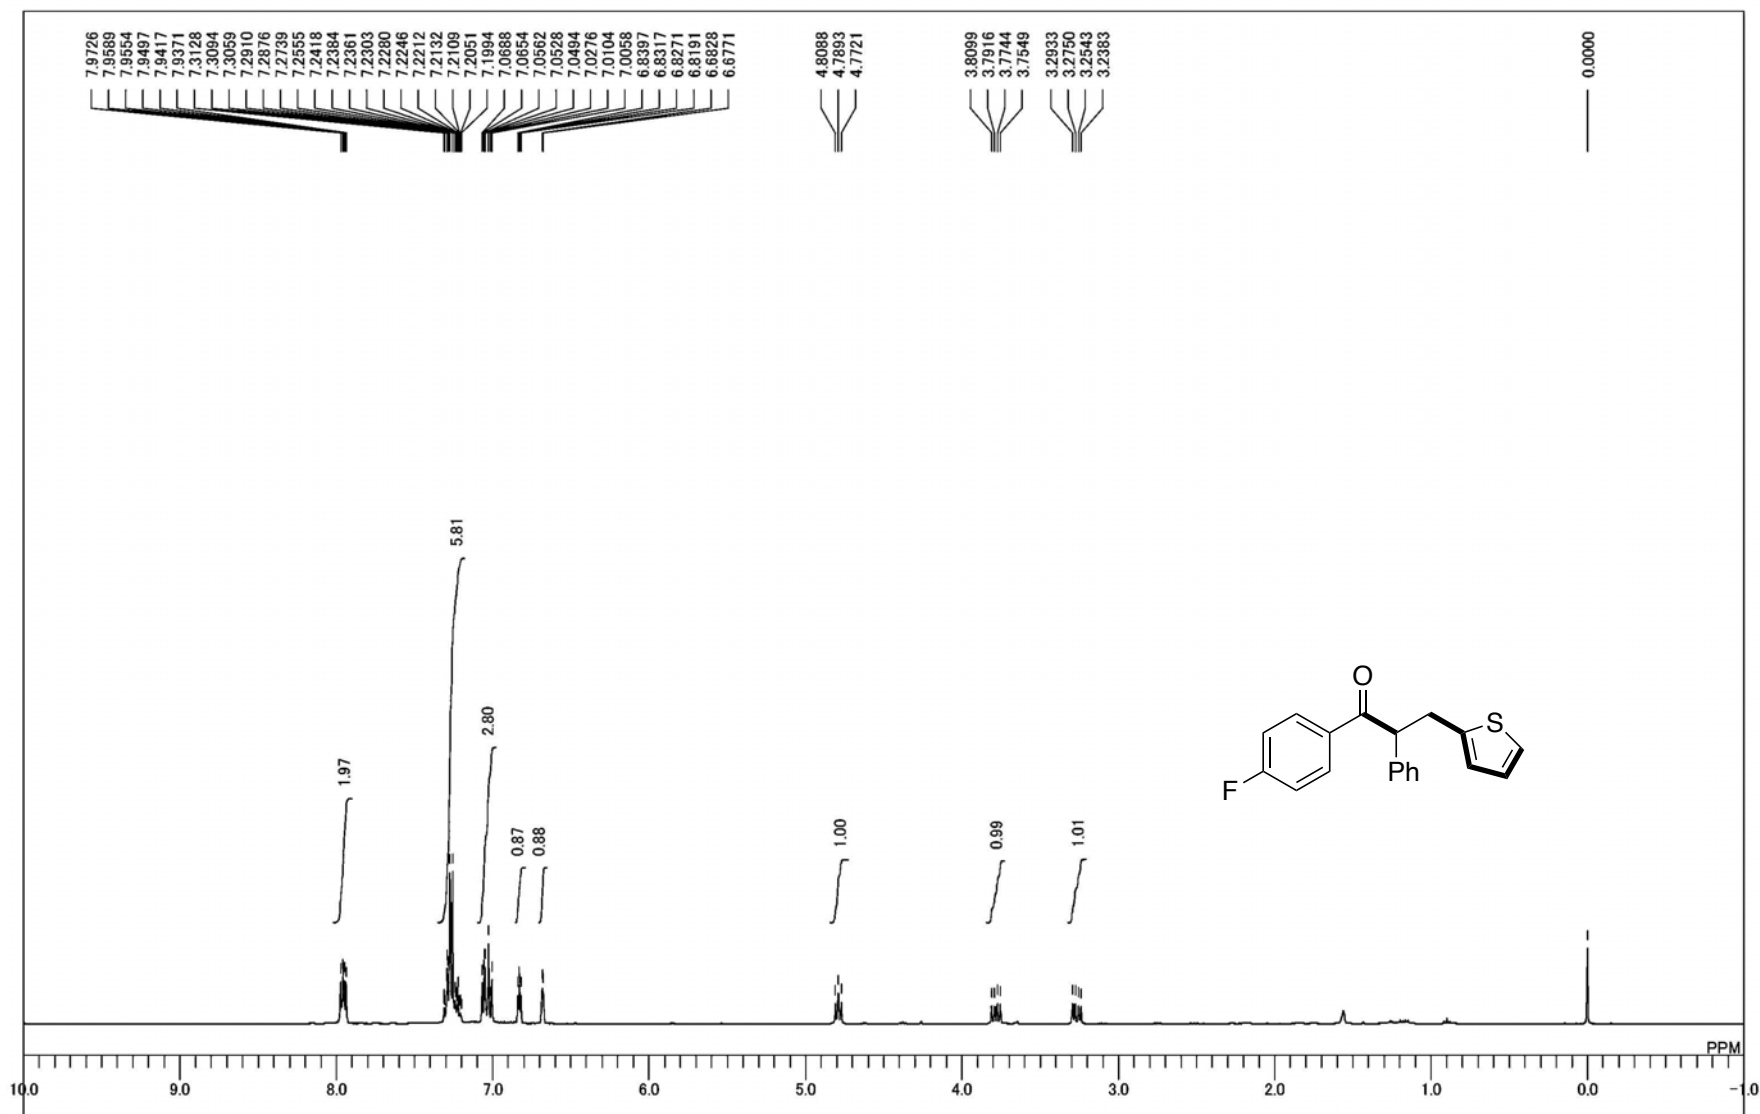

Supplementary Fig. 46 | <sup>1</sup>H NMR spectrum of 6dag

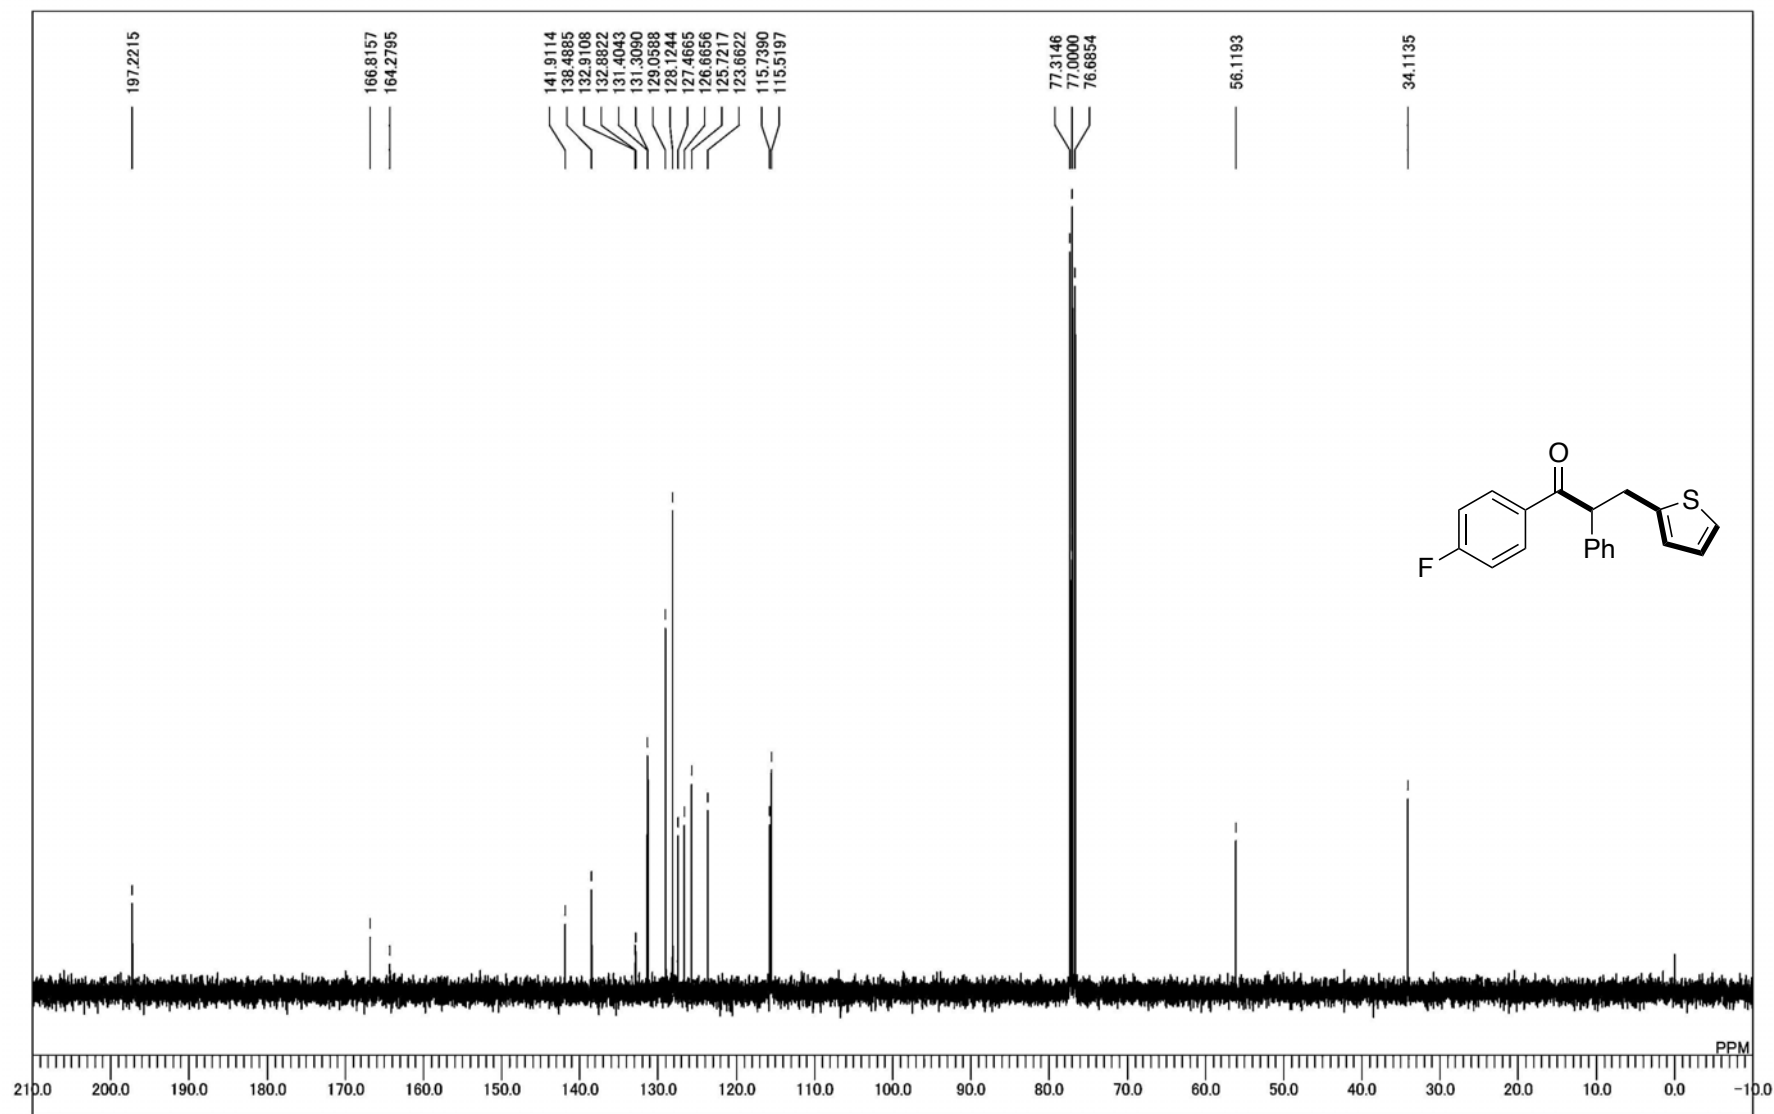

Supplementary Fig. 47 |  $^{13}\text{C}$  NMR spectrum of **6dag**



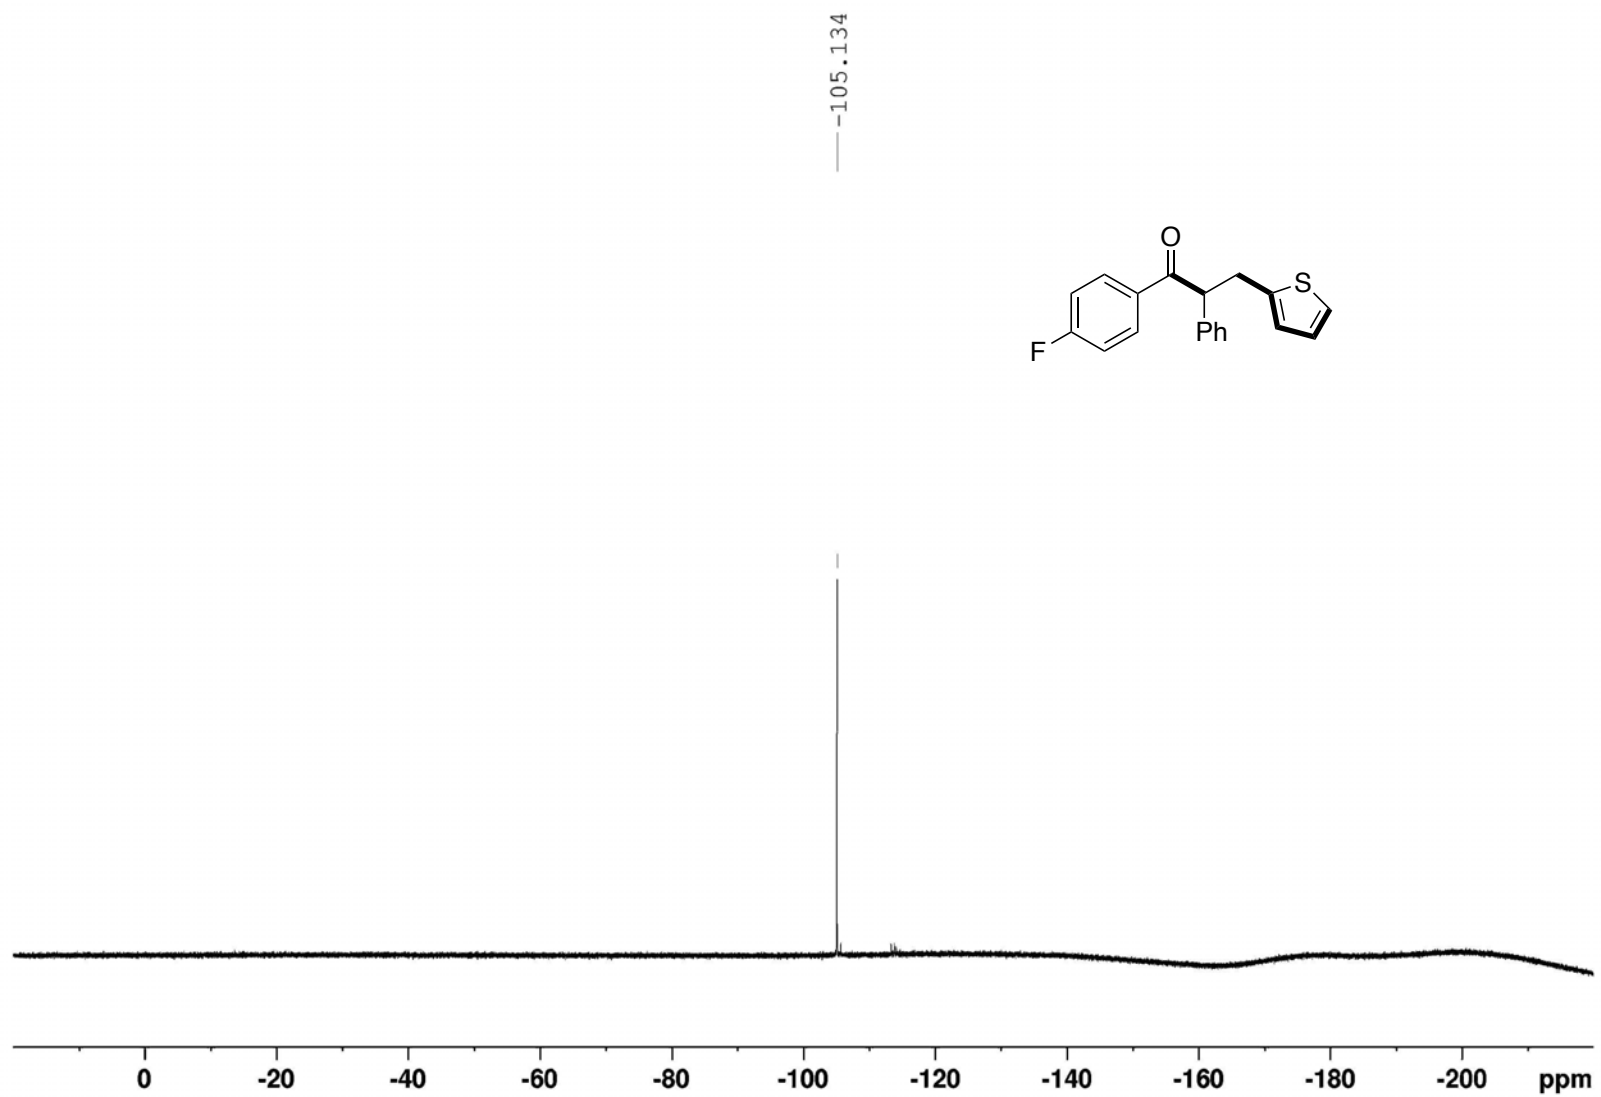

Supplementary Fig. 48 |  $^{19}\text{F}$  NMR spectrum of **6dag**

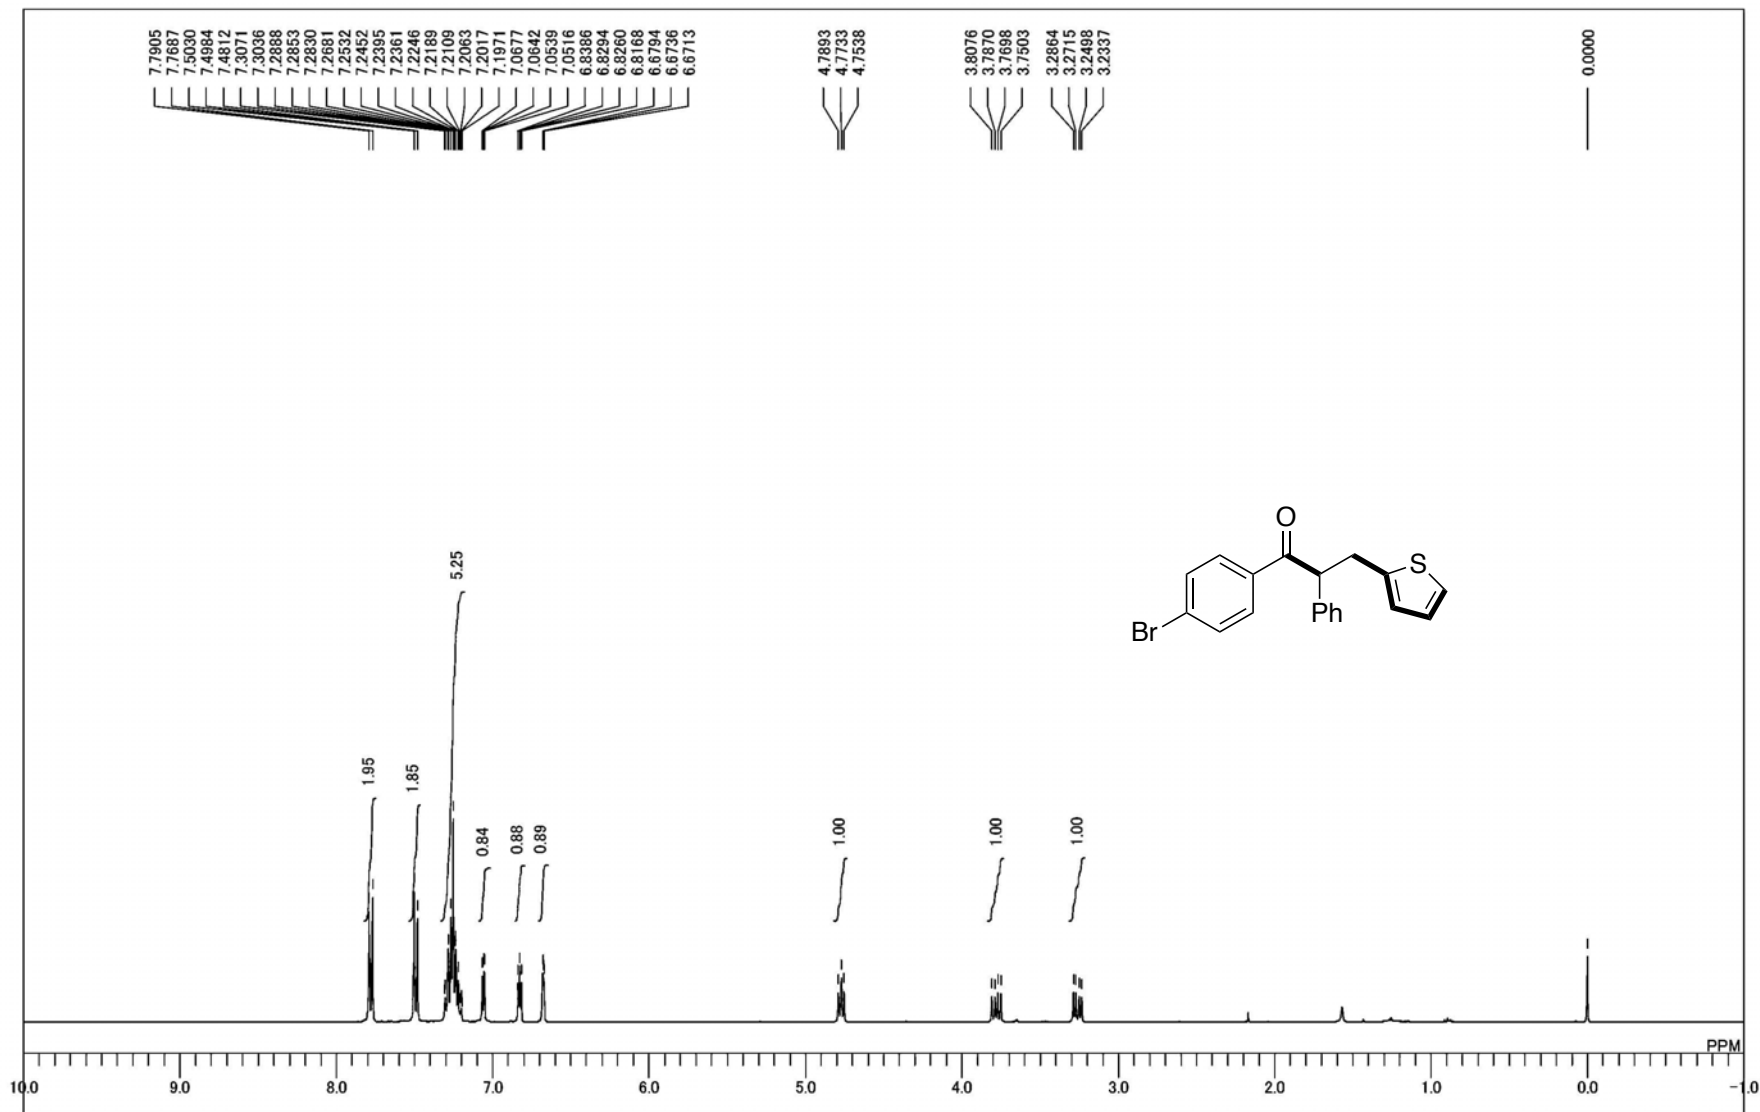

Supplementary Fig. 49 | <sup>1</sup>H NMR spectrum of 6eag

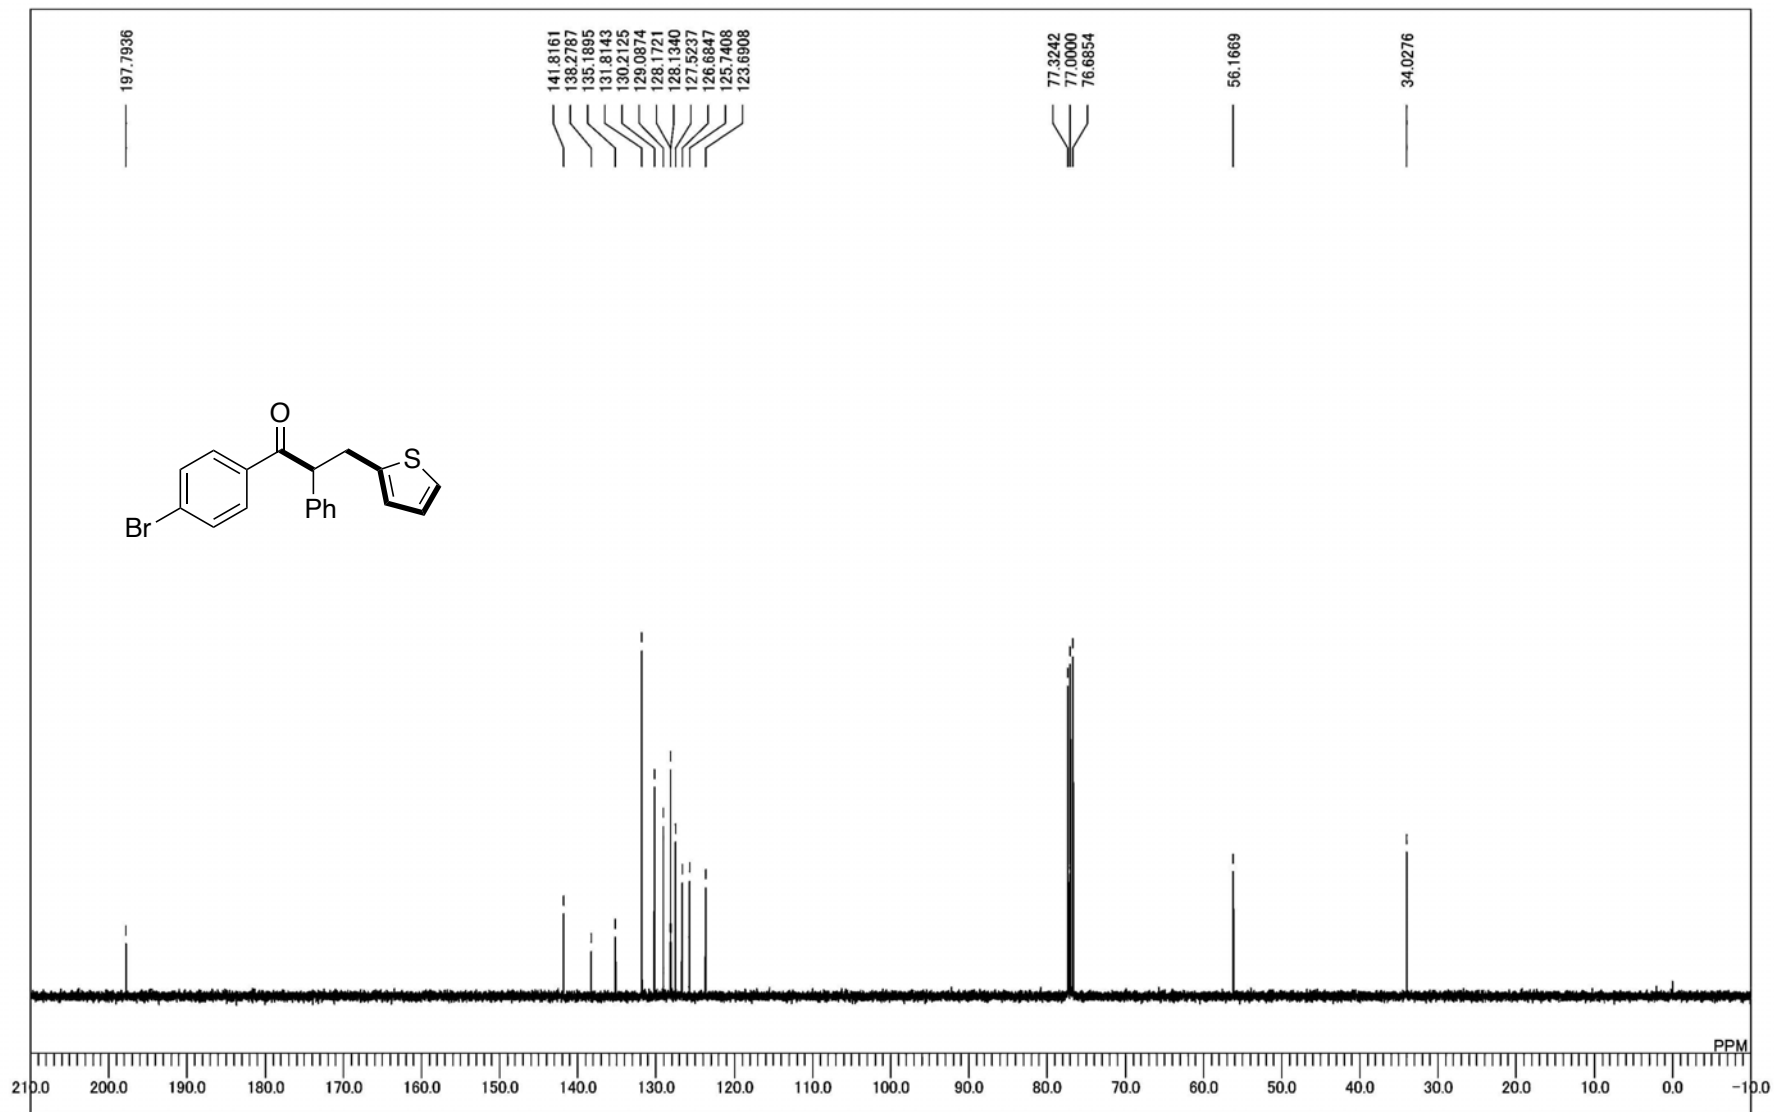

Supplementary Fig. 50 | <sup>13</sup>C NMR spectrum of 6eag

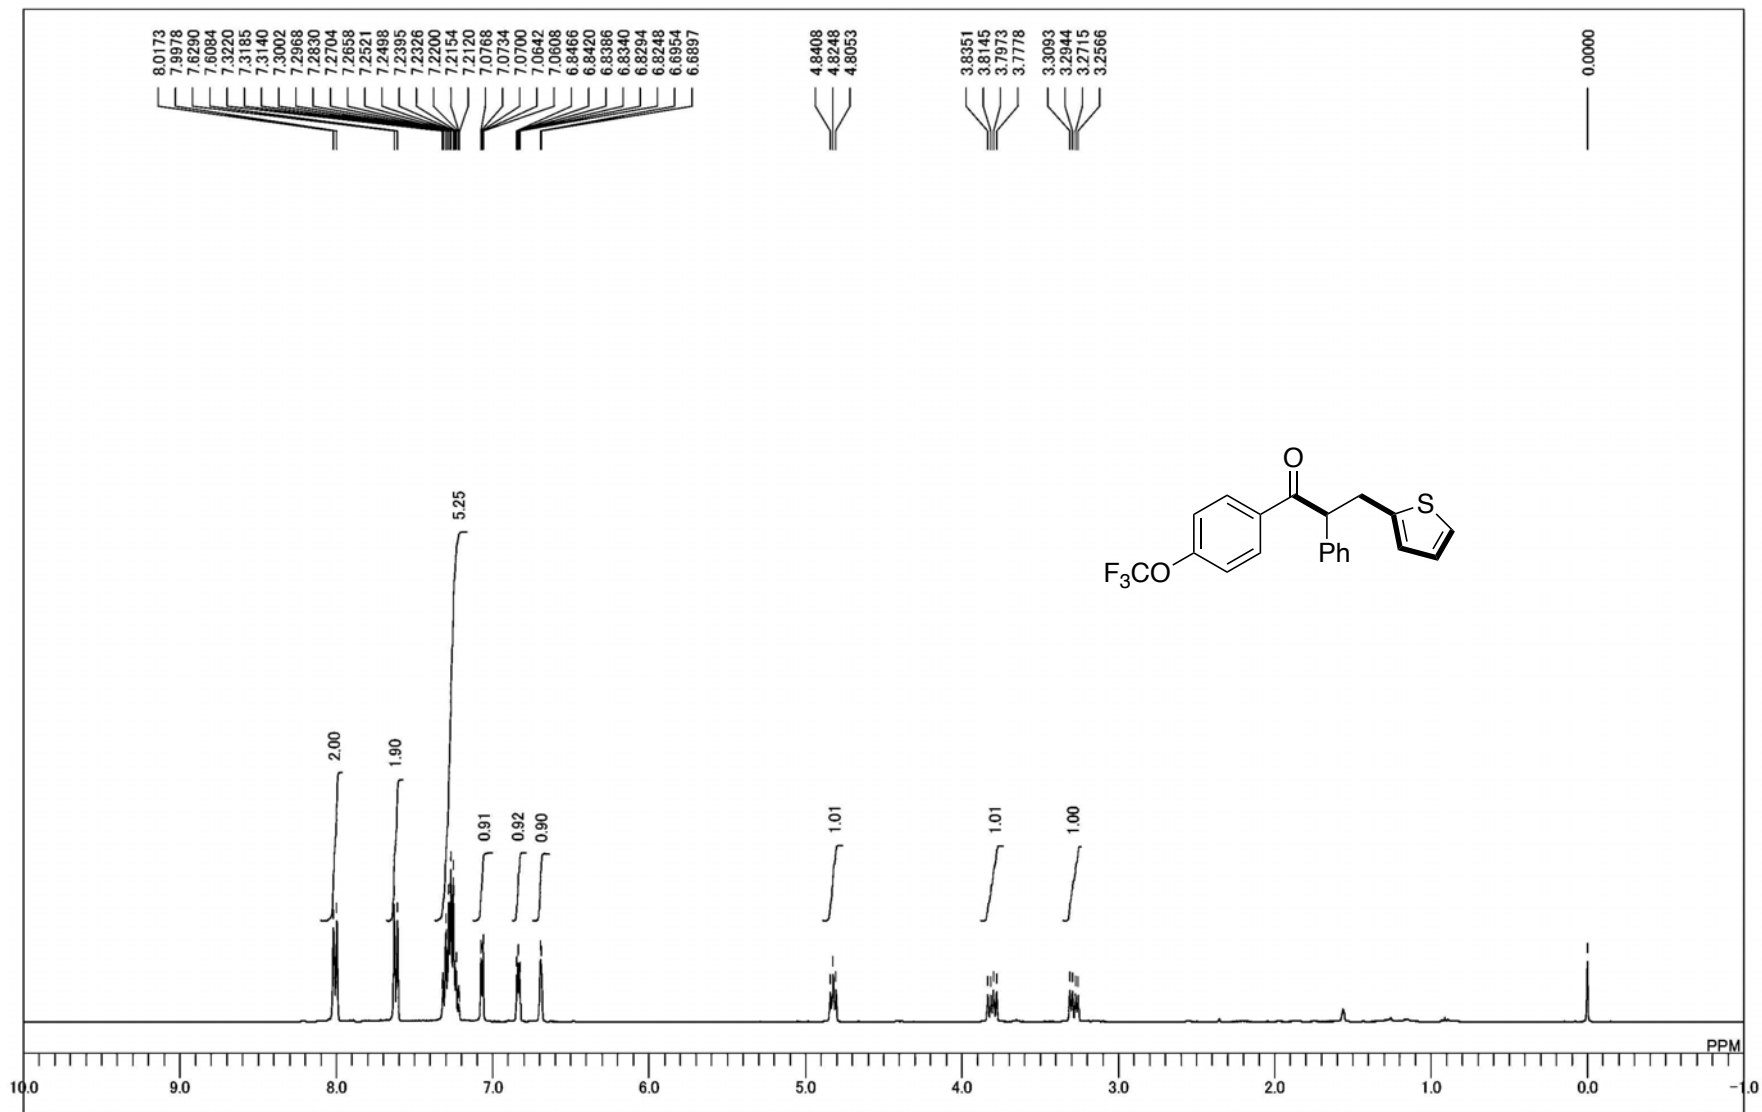

Supplementary Fig. 51 |  $^1\text{H}$  NMR spectrum of 6fag

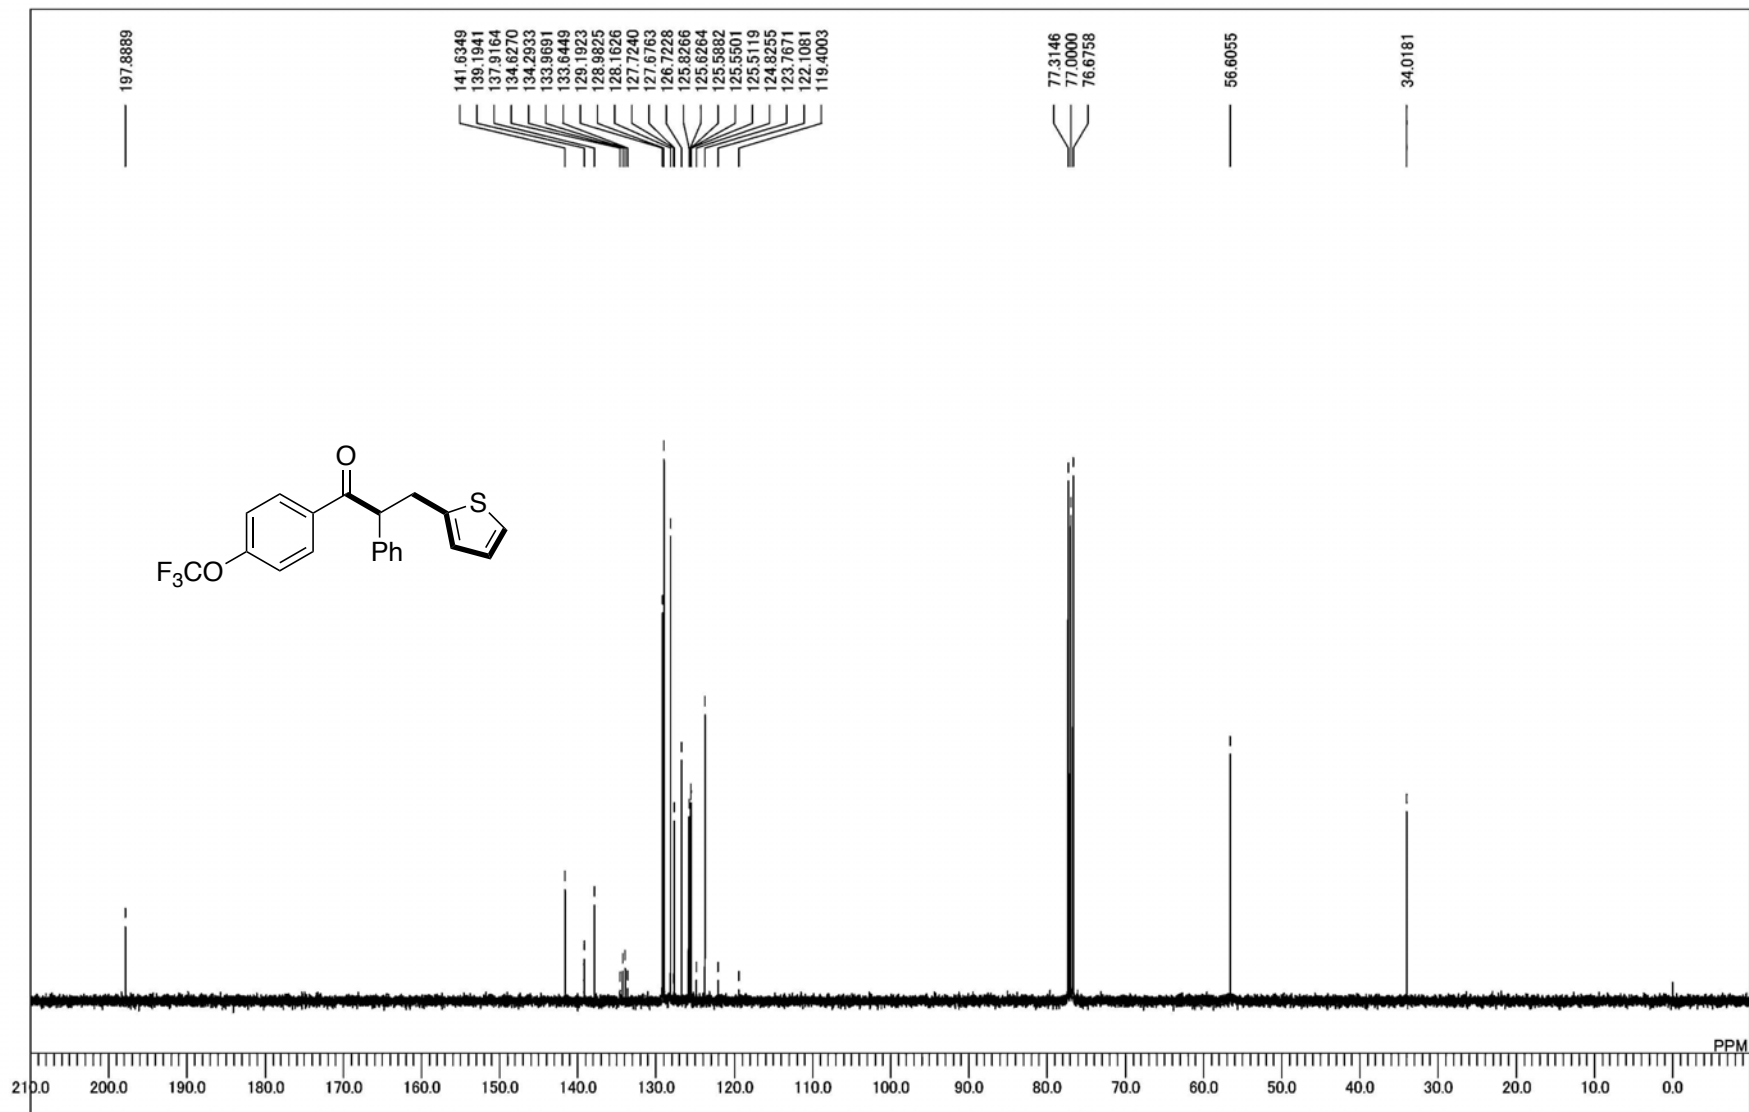

Supplementary Fig. 52 |  $^{13}\text{C}$  NMR spectrum of **6fag**

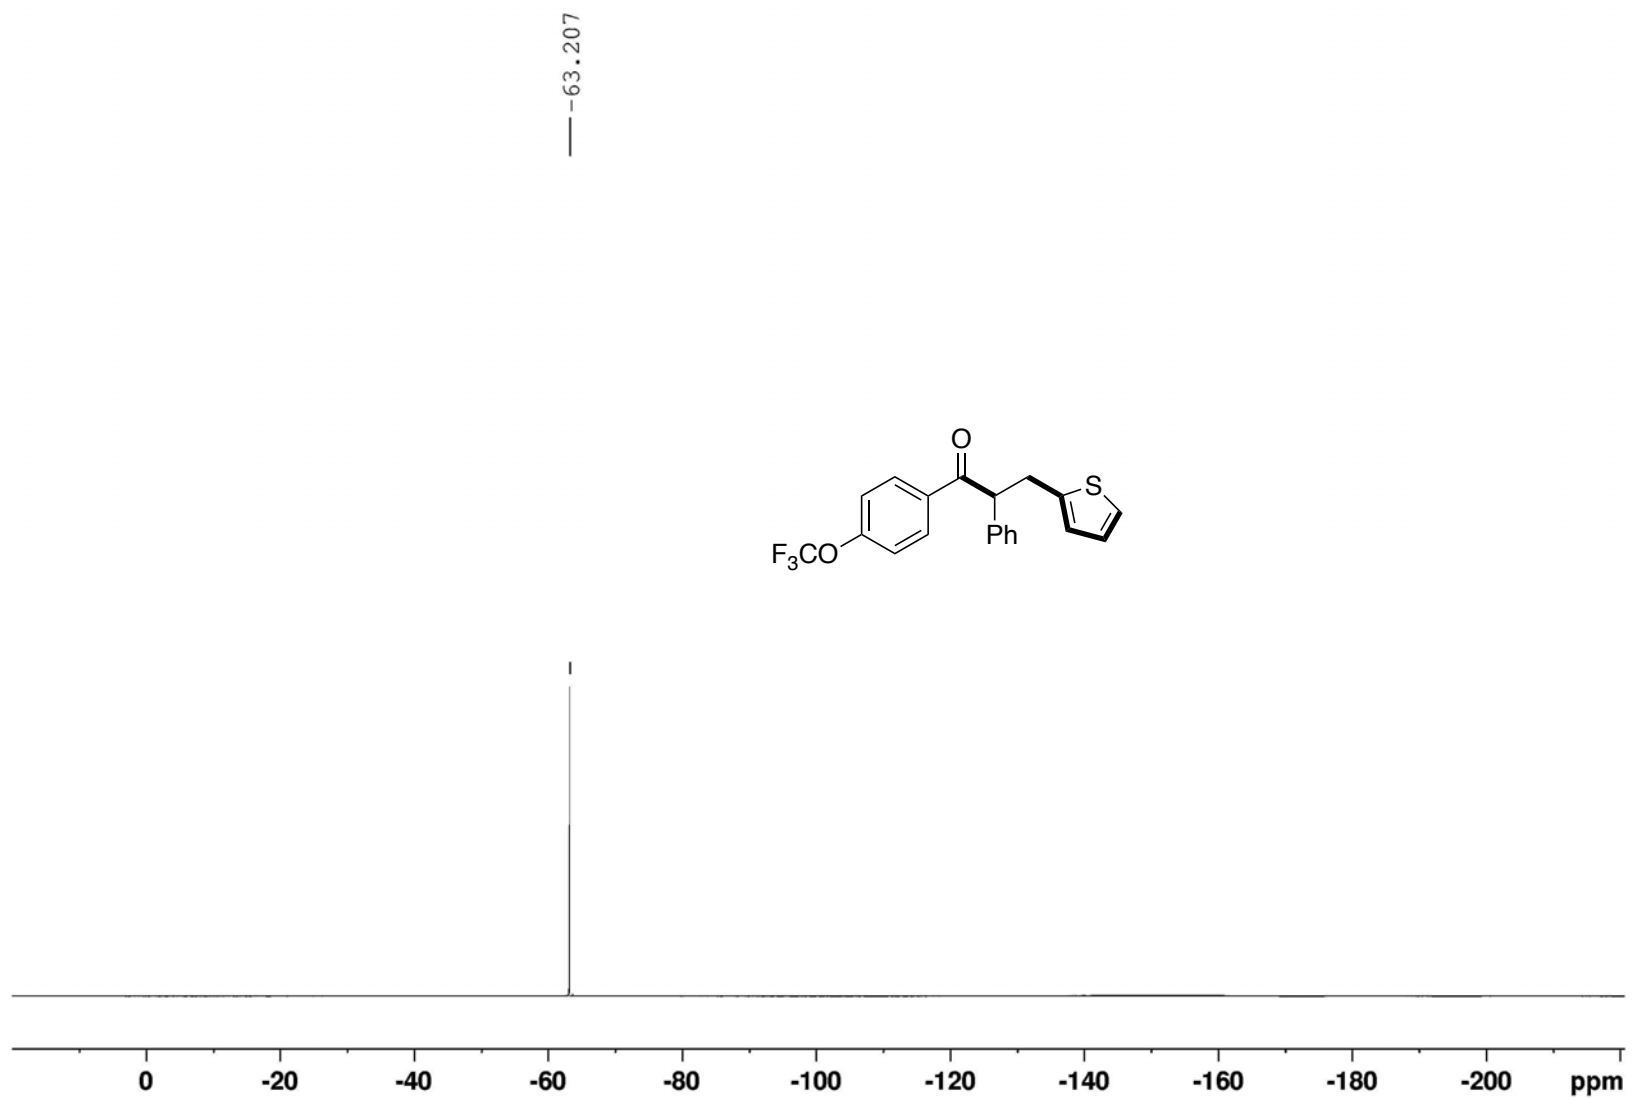

Supplementary Fig. 53 |  $^{19}\text{F}$  NMR spectrum of **6fag**

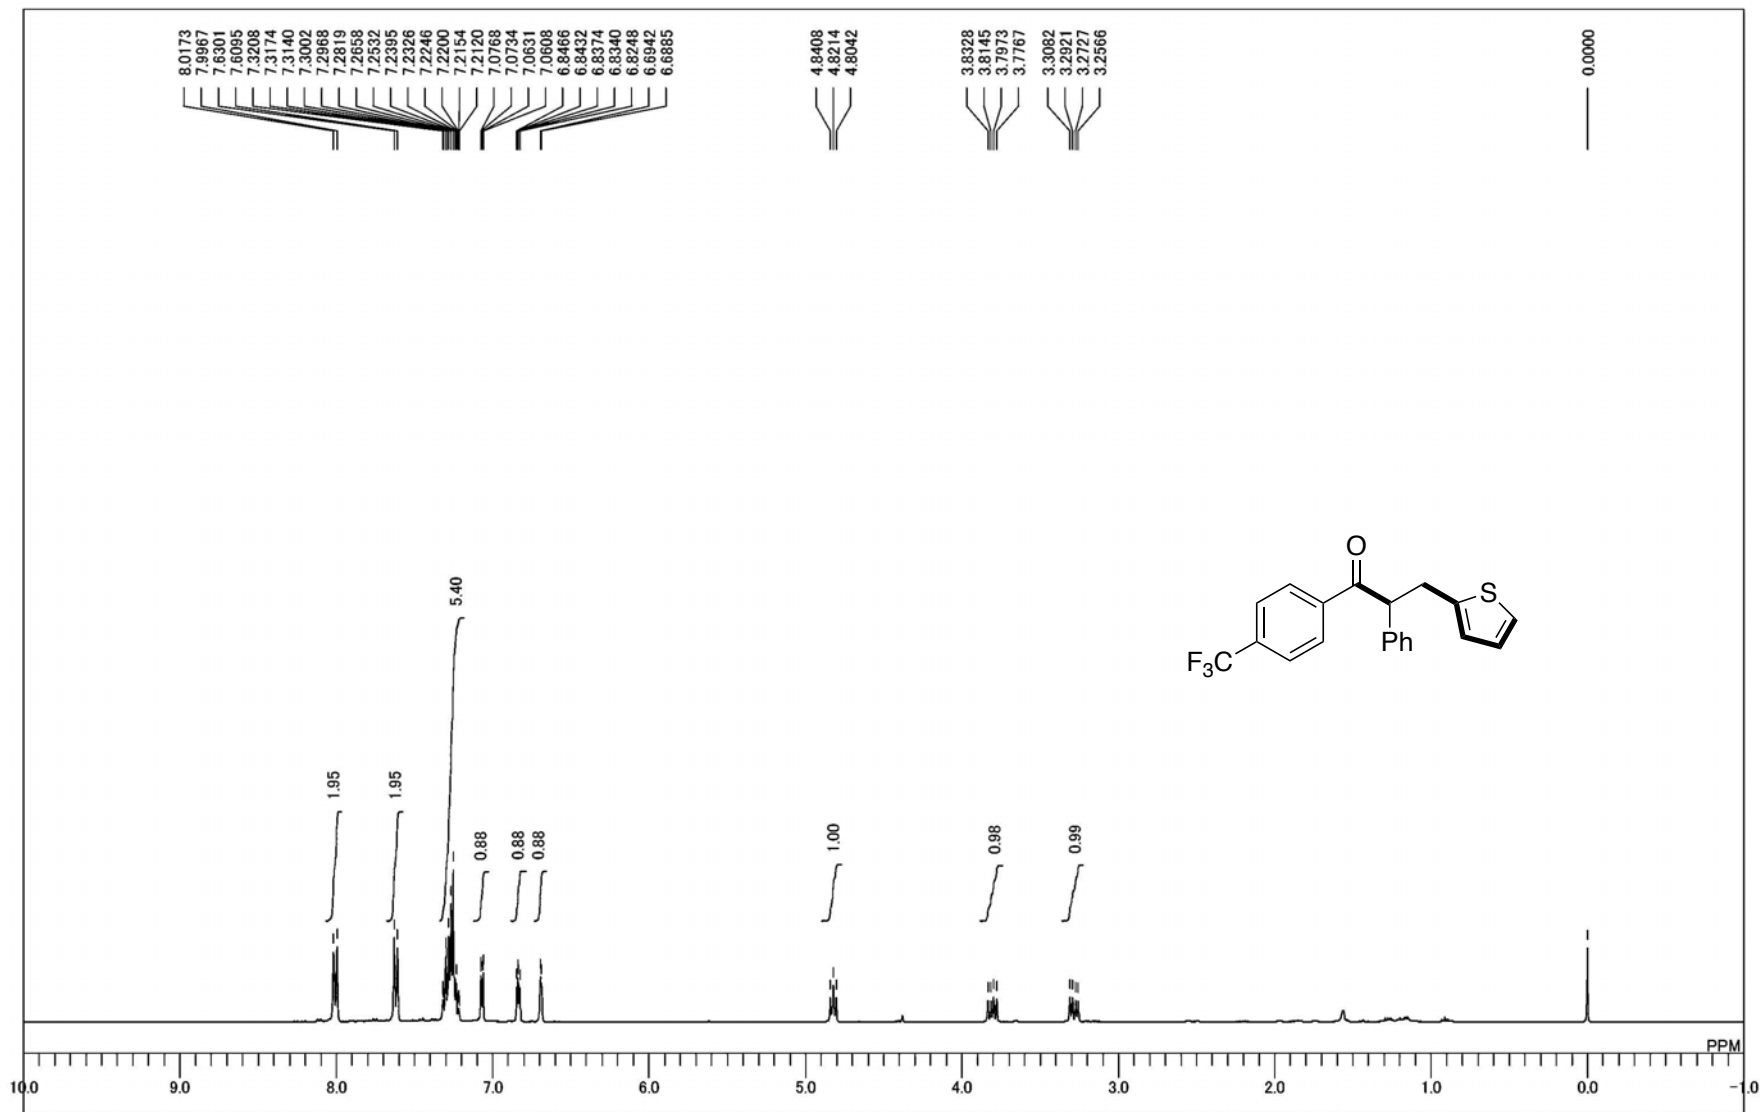

Supplementary Fig. 54 |  $^1\text{H}$  NMR spectrum of 6gag

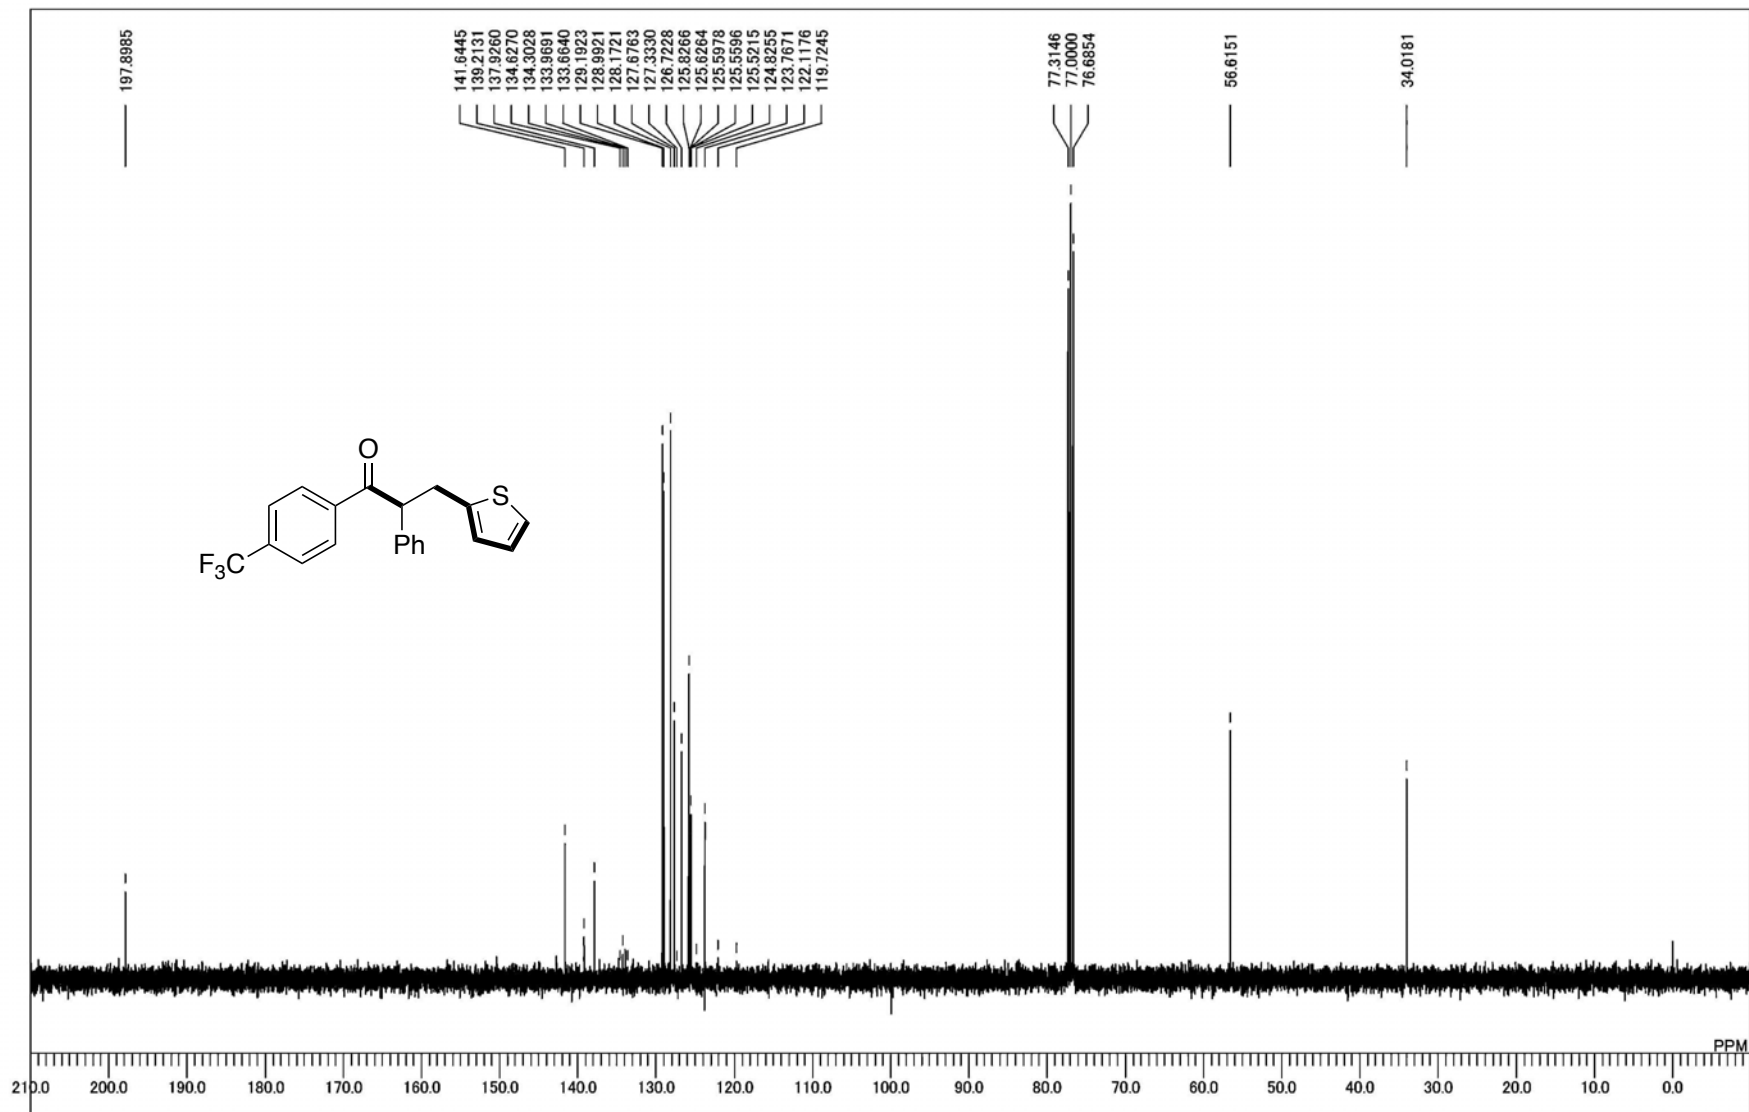

Supplementary Fig. 55 | <sup>13</sup>C NMR spectrum of 6gag



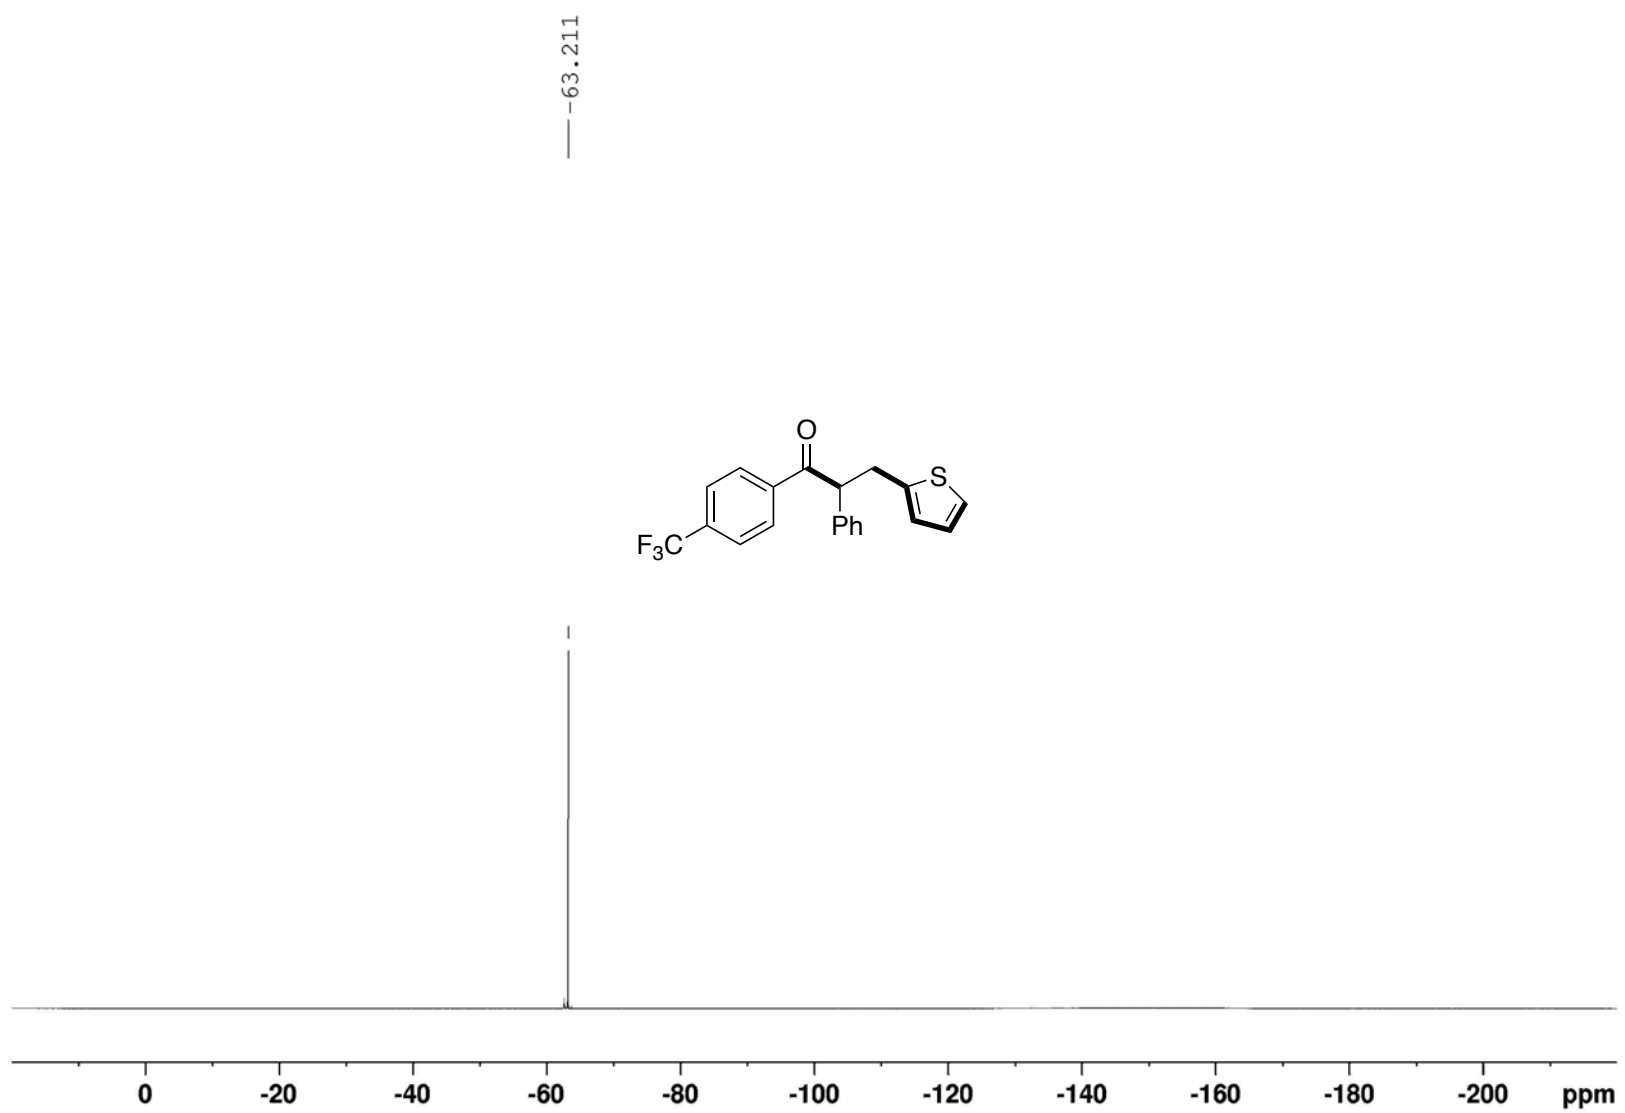

Supplementary Fig. 56 |  $^{19}\text{F}$  NMR spectrum of **6gag**

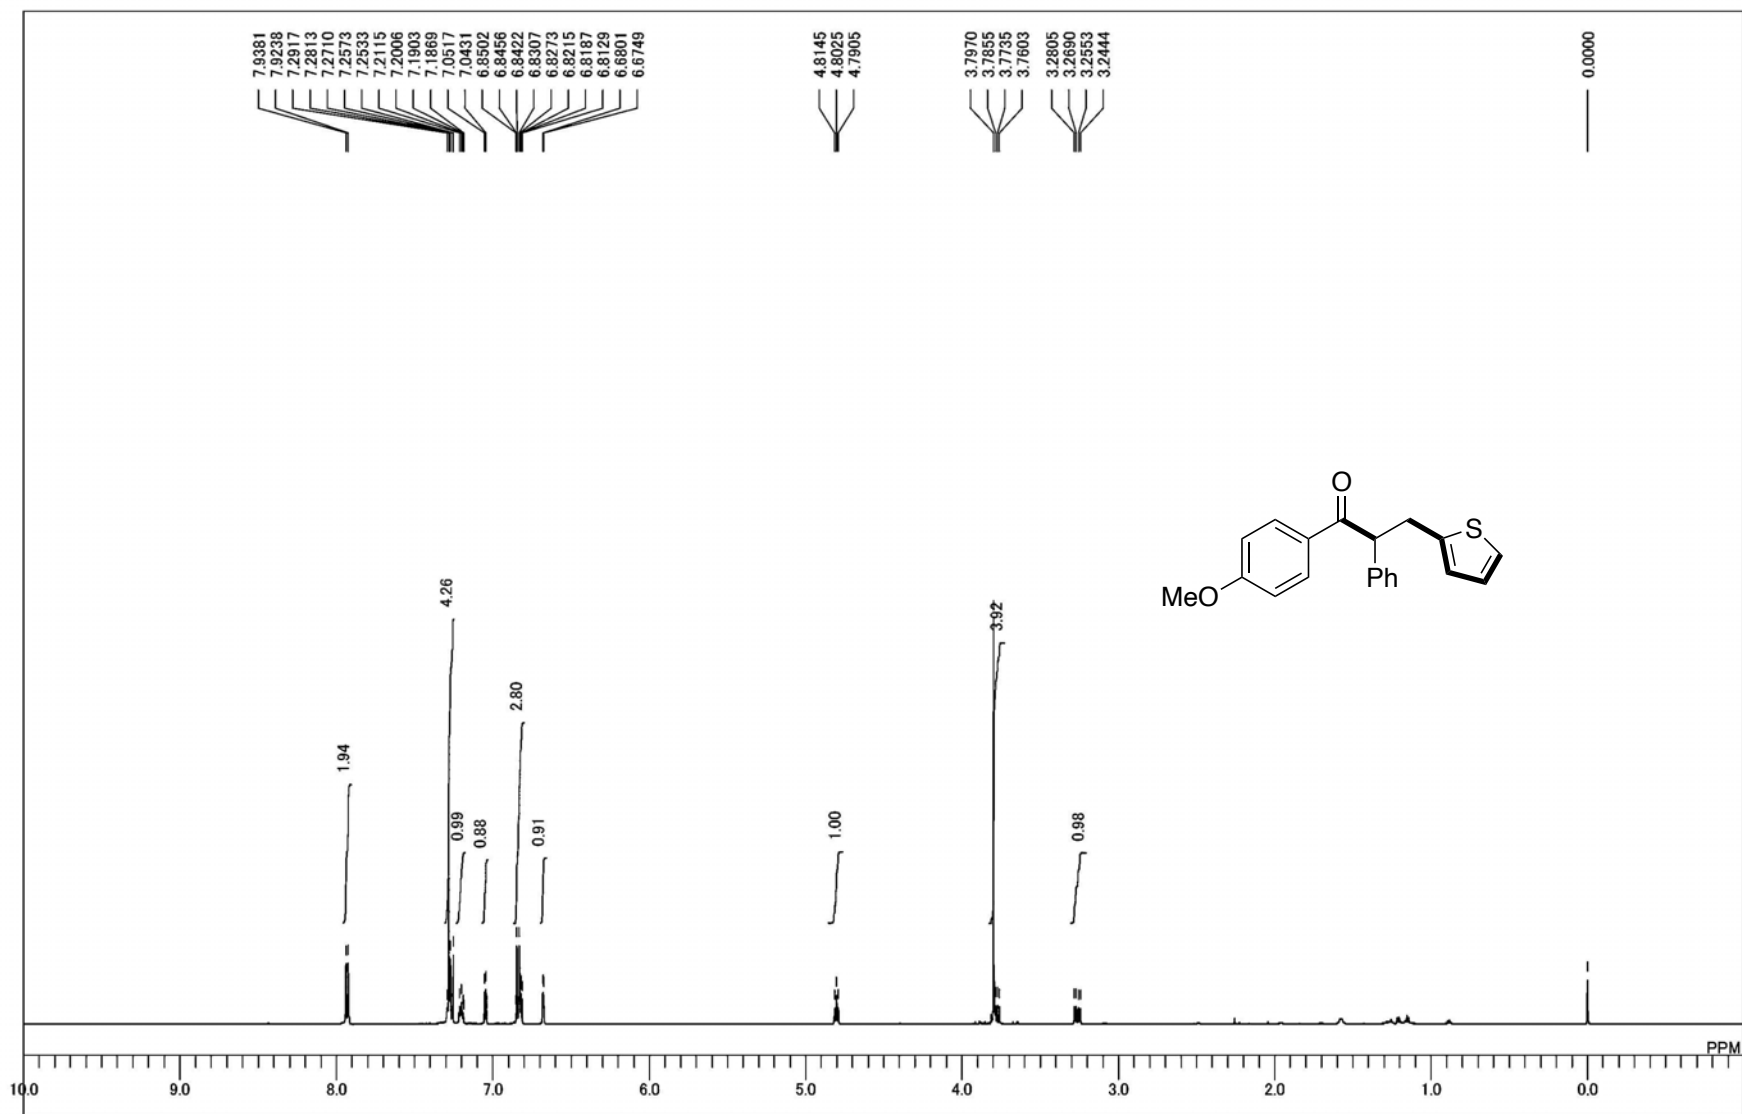

Supplementary Fig. 57 | <sup>1</sup>H NMR spectrum of 6hag

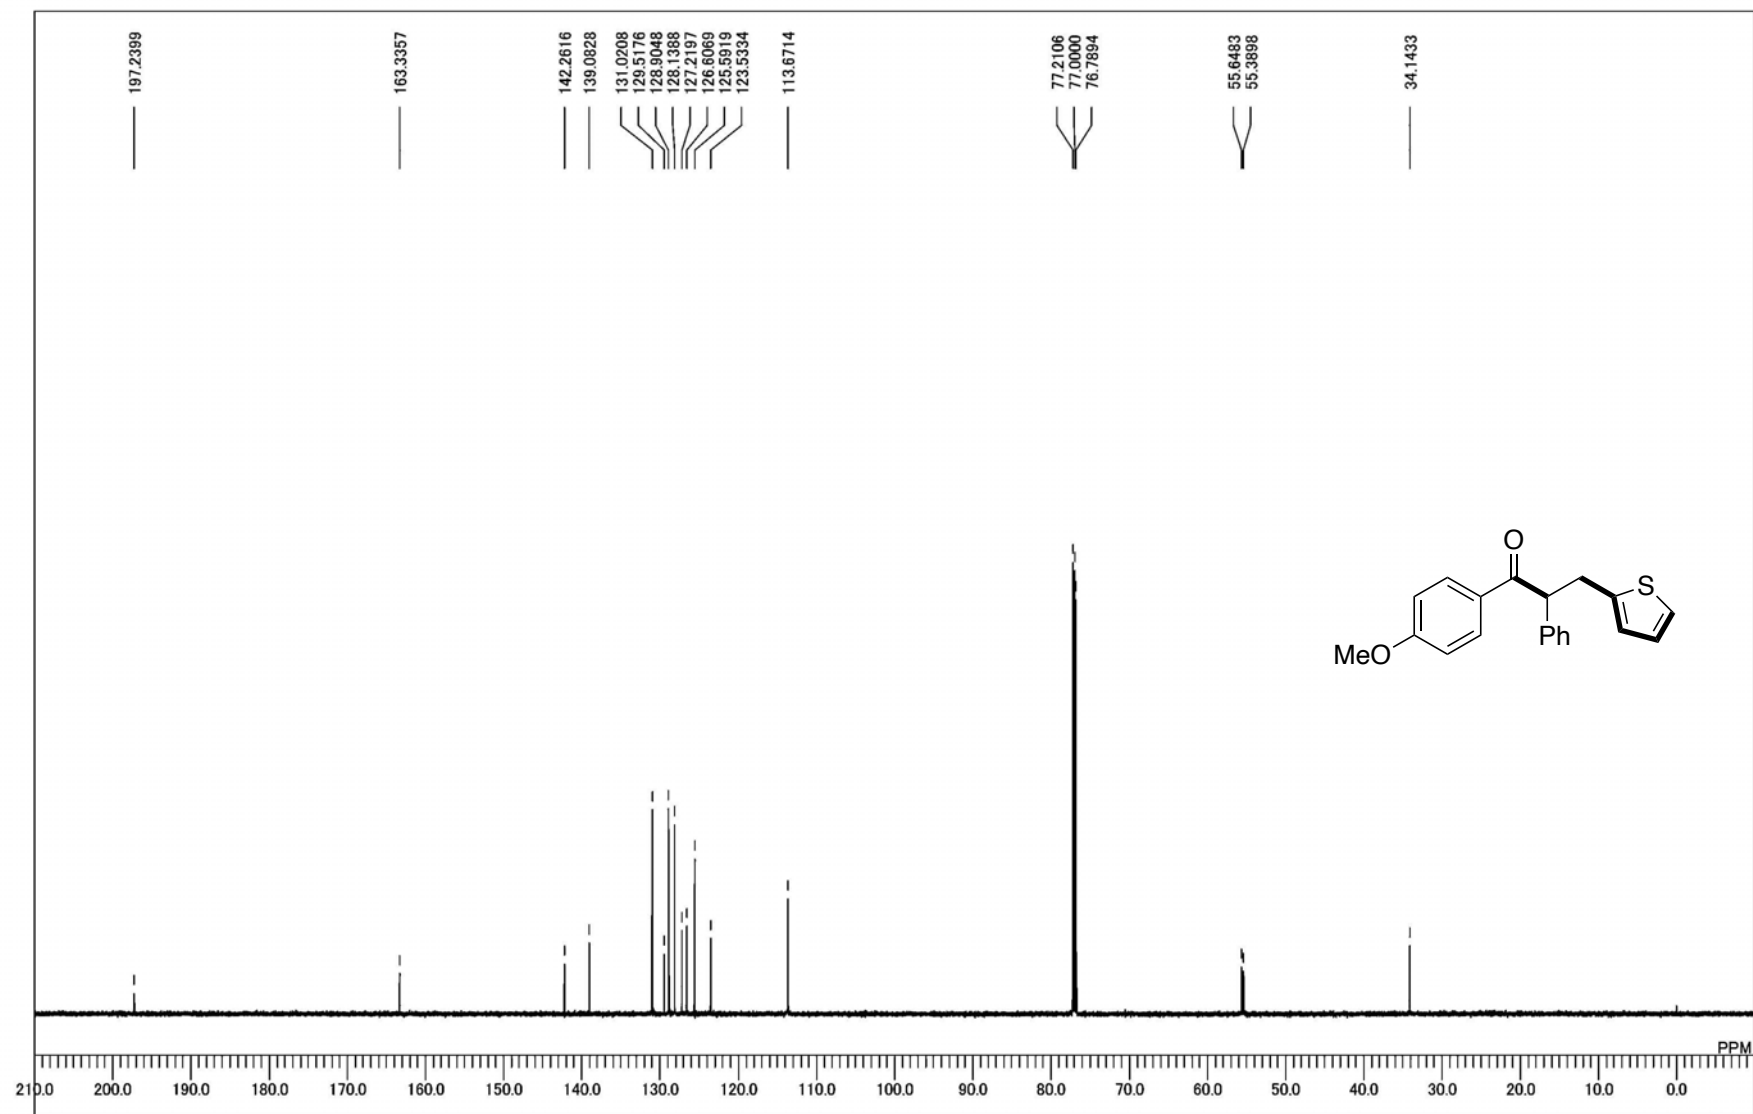

Supplementary Fig. 58 |  $^{13}\text{C}$  NMR spectrum of **6hag**

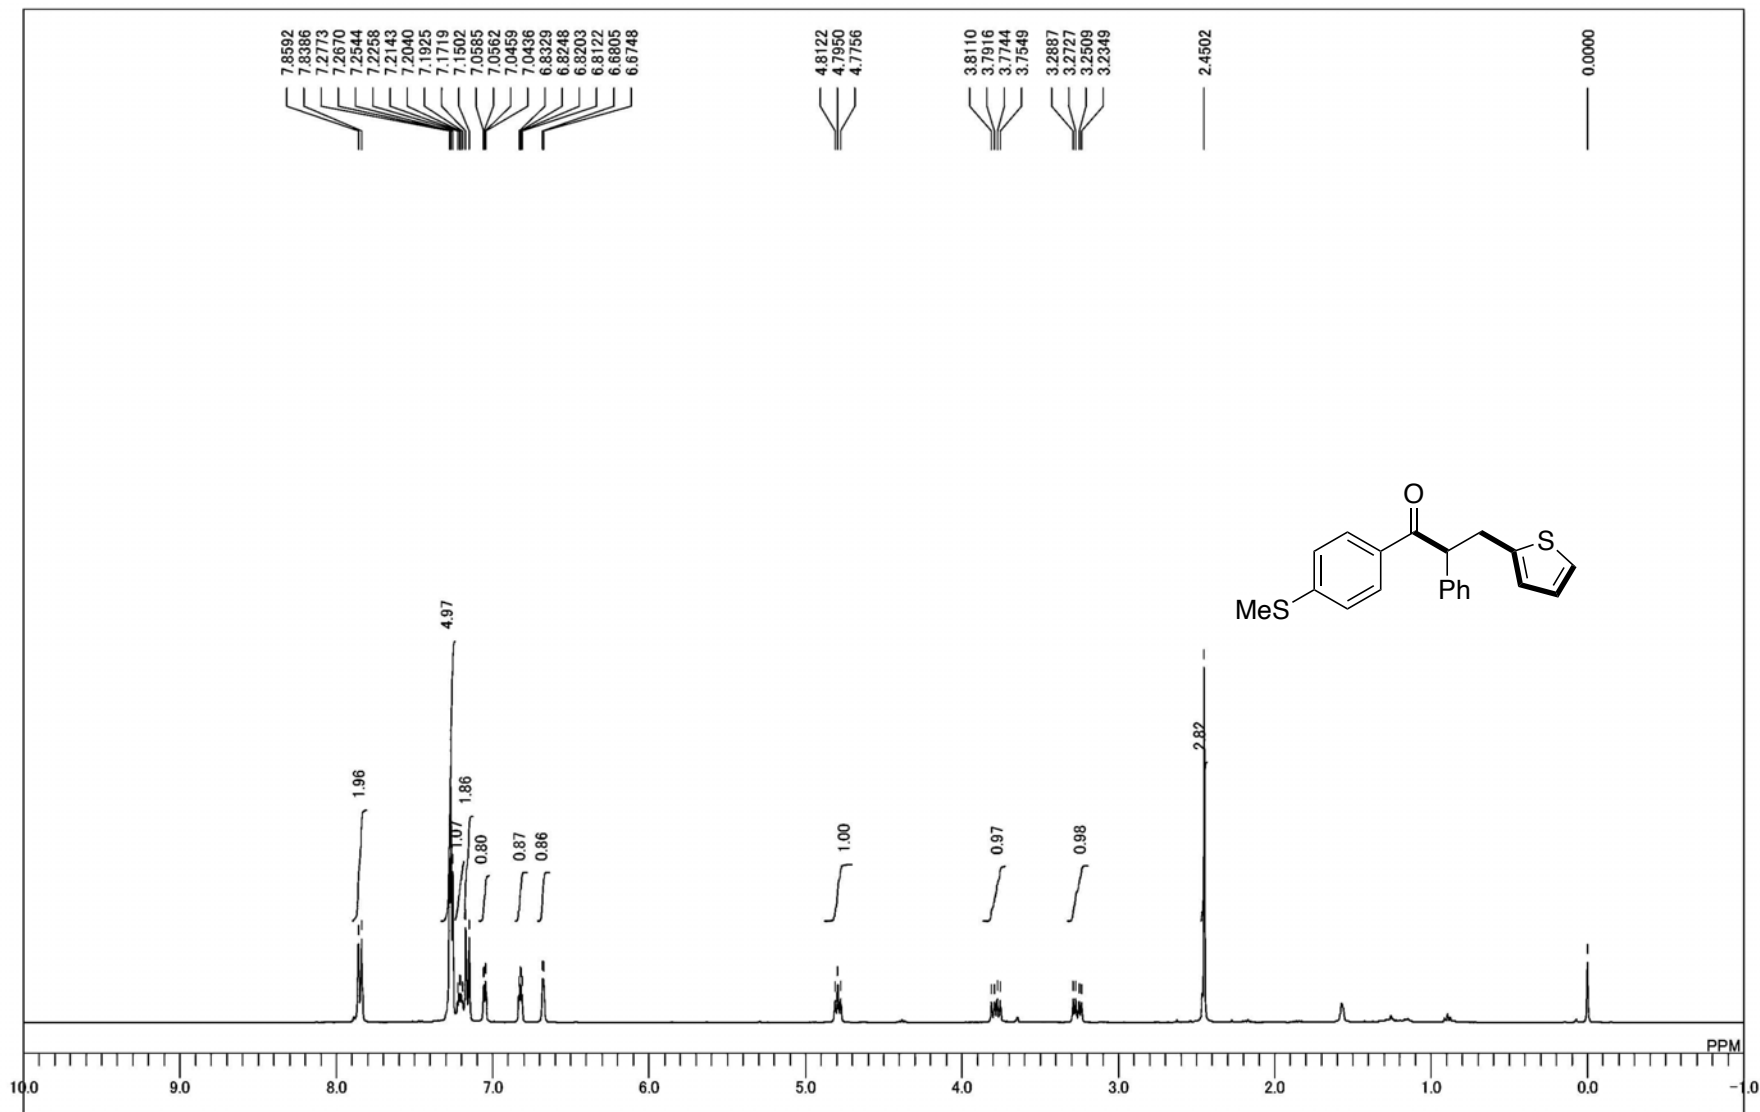

Supplementary Fig. 59 | <sup>1</sup>H NMR spectrum of **6iag**

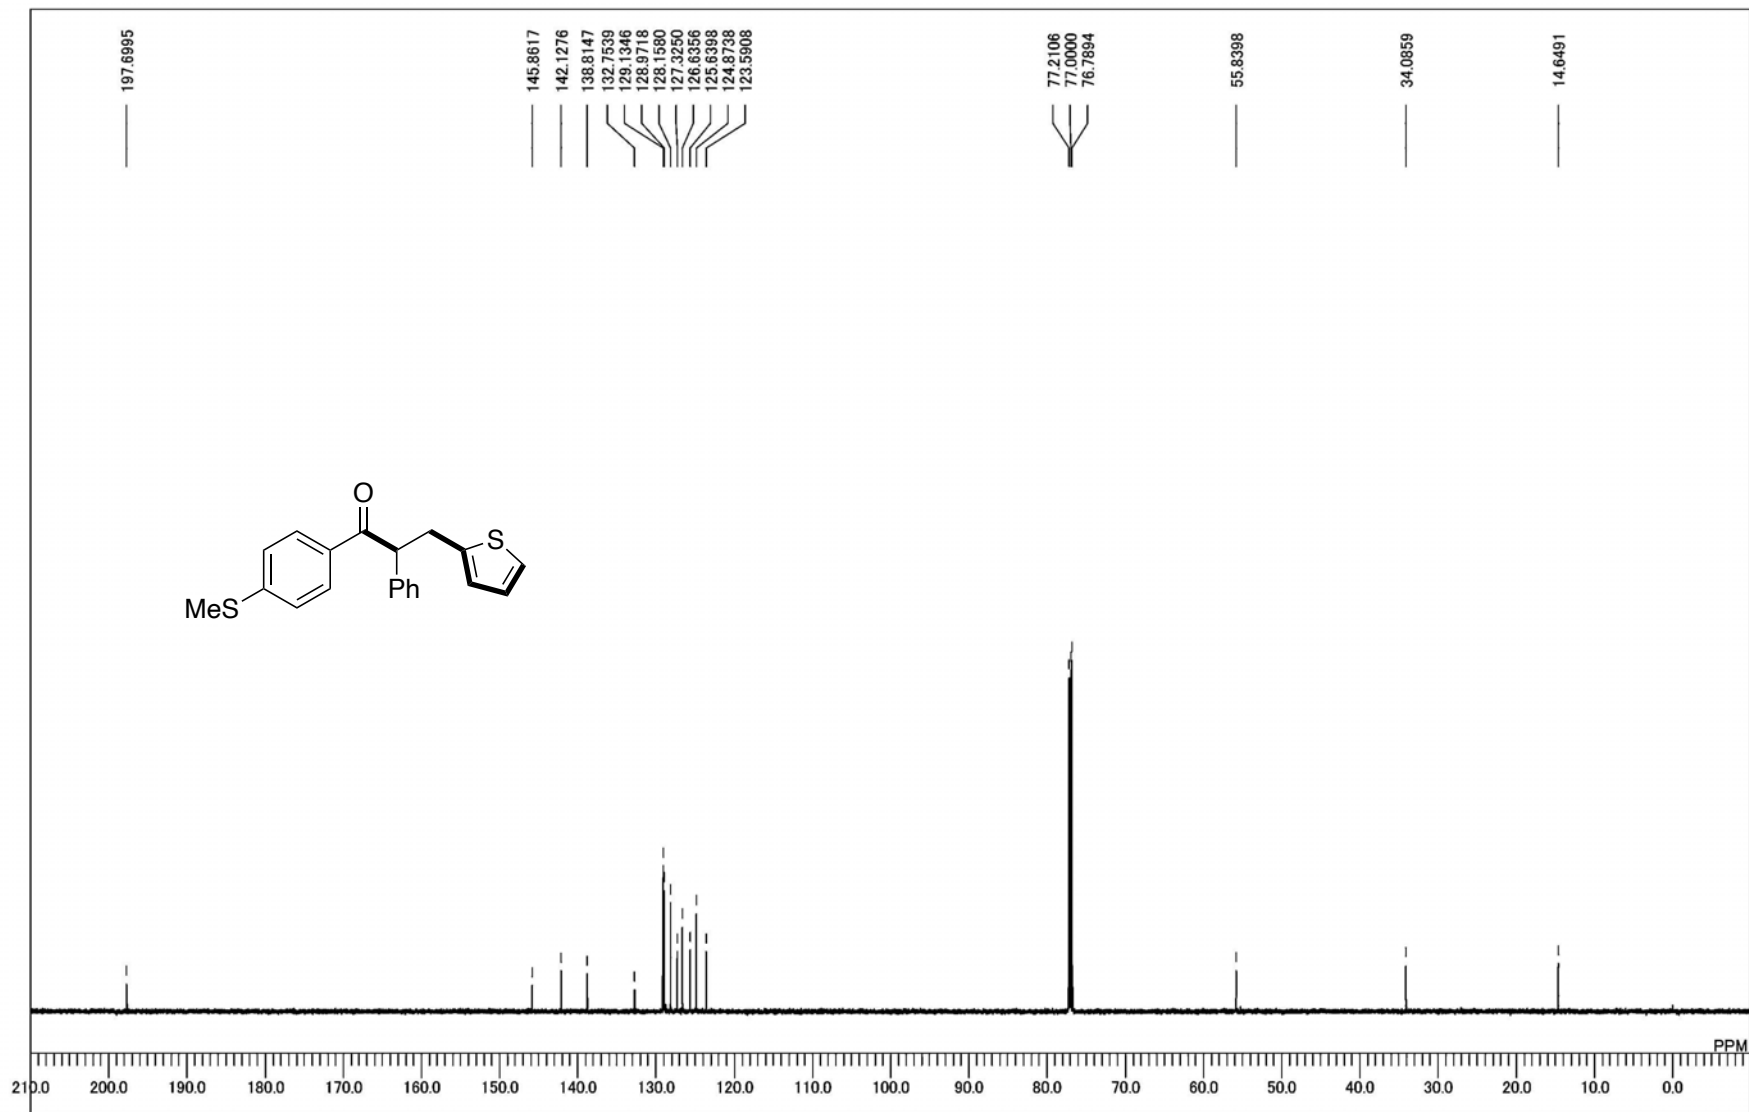

Supplementary Fig. 60 | <sup>13</sup>C NMR spectrum of 6iag

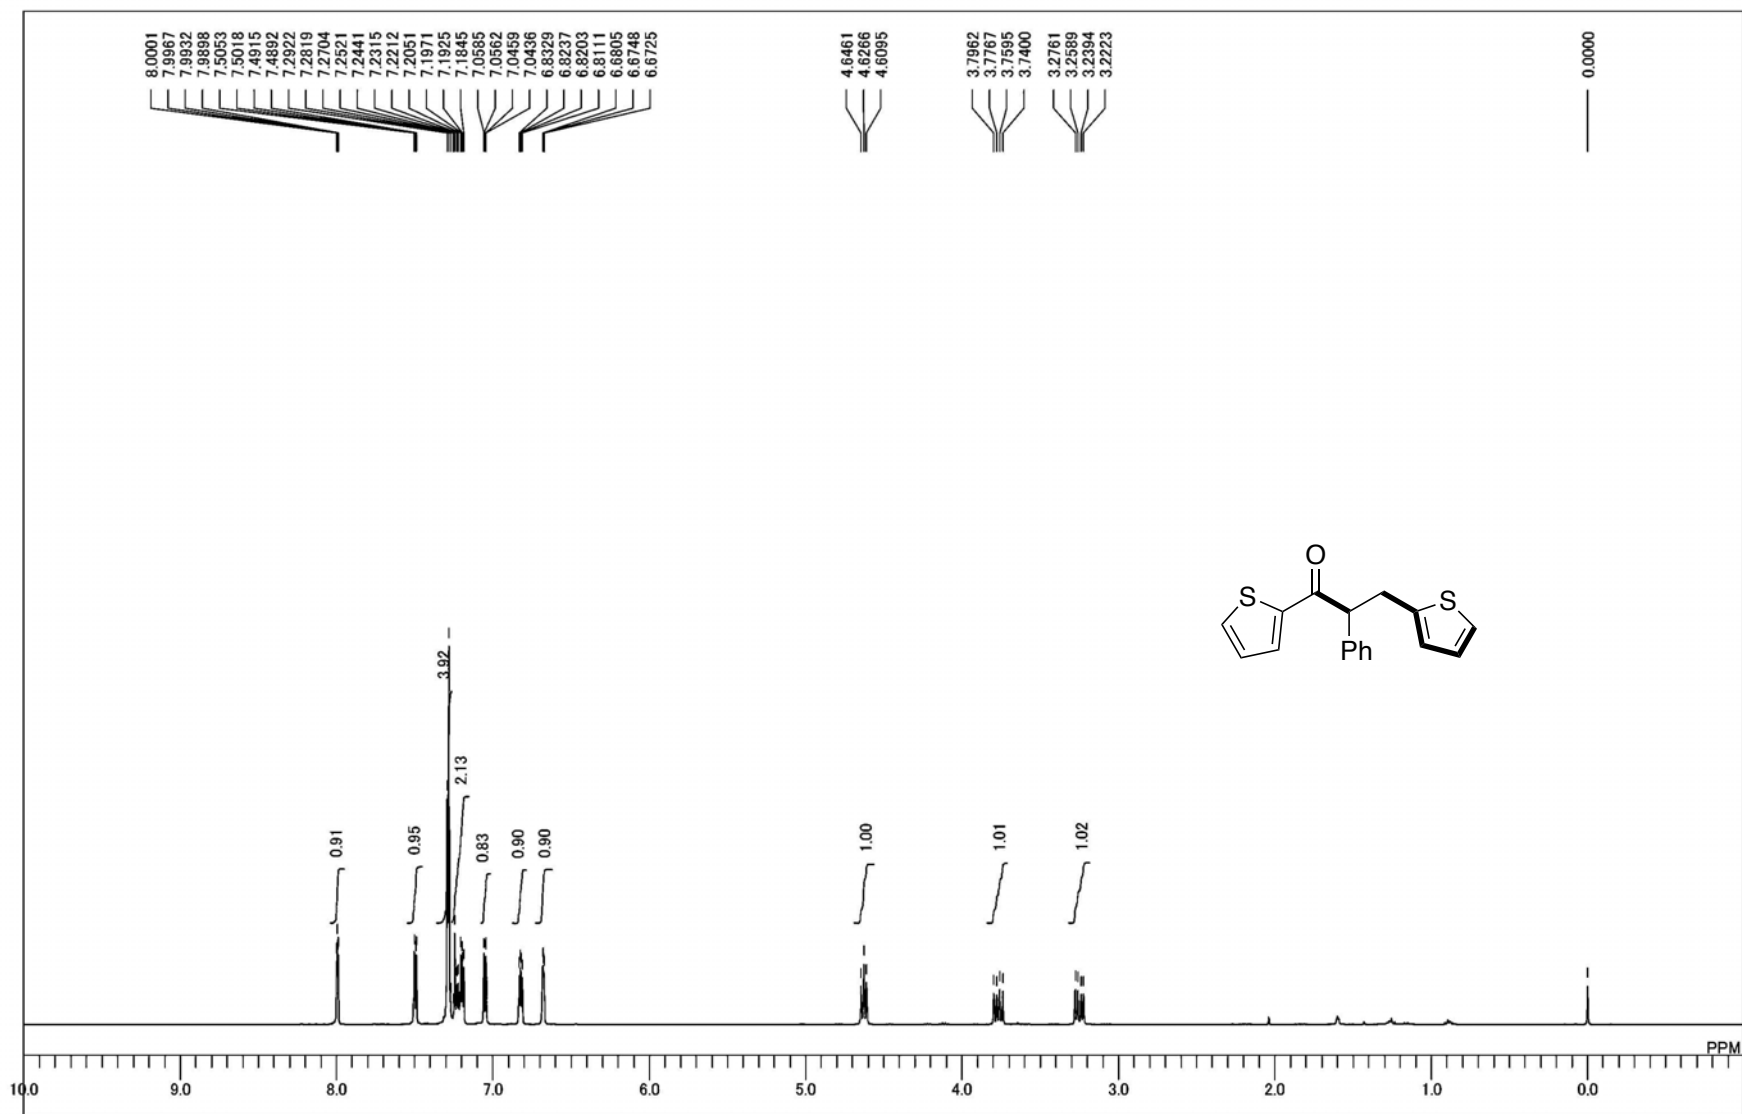

Supplementary Fig. 61 |  $^1\text{H}$  NMR spectrum of 6jag

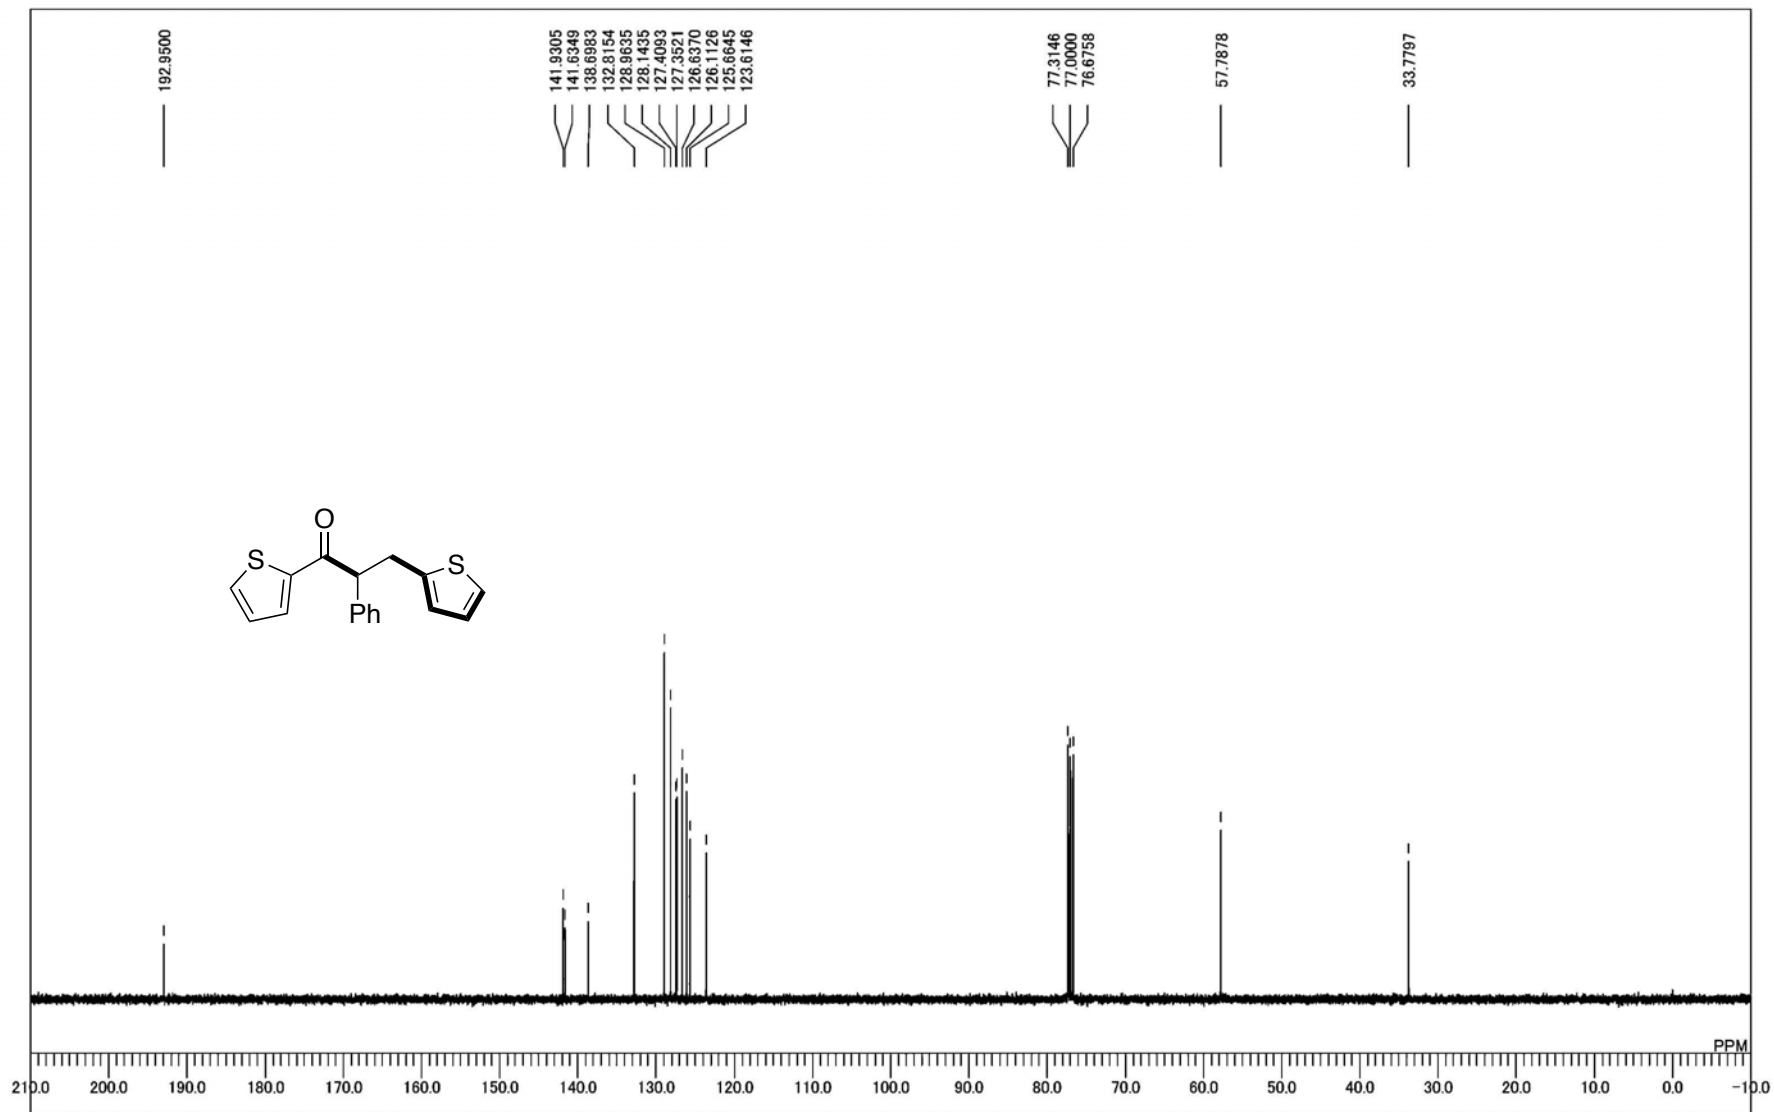

Supplementary Fig. 62 | <sup>13</sup>C NMR spectrum of 6jag

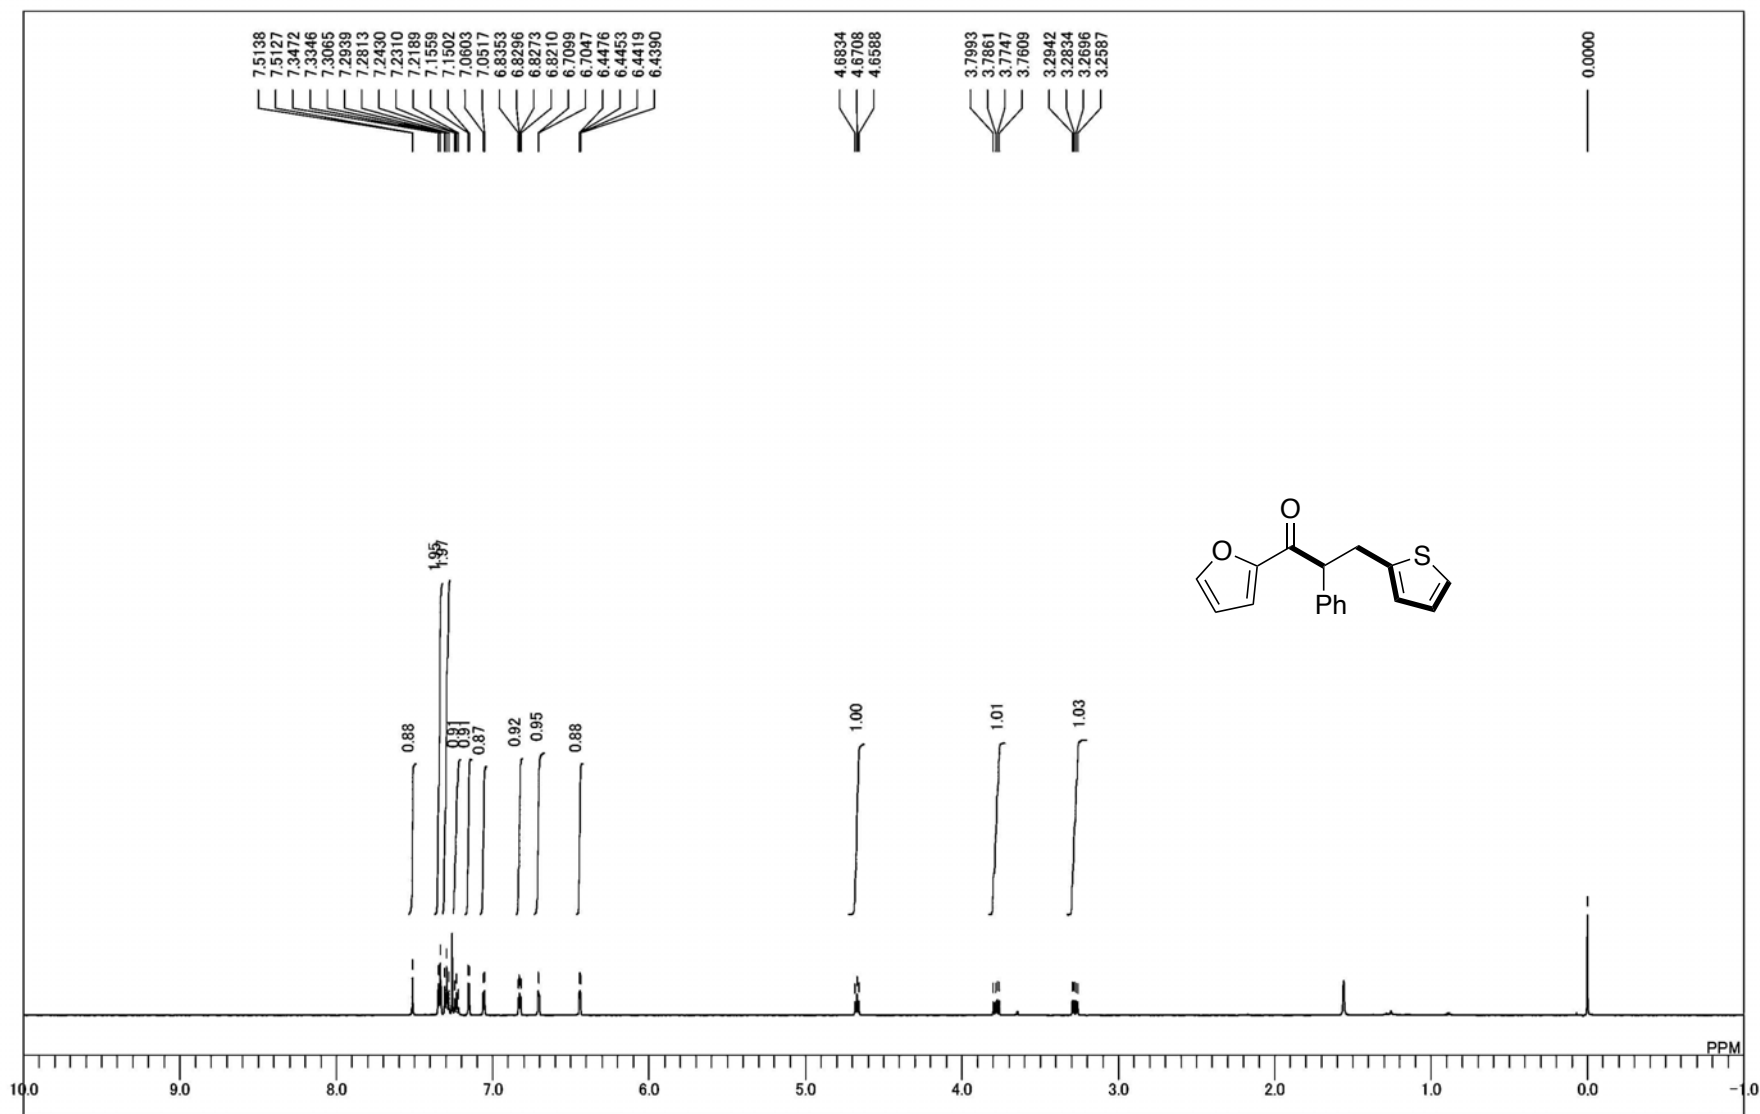

Supplementary Fig. 63 |  $^1\text{H}$  NMR spectrum of 6kag



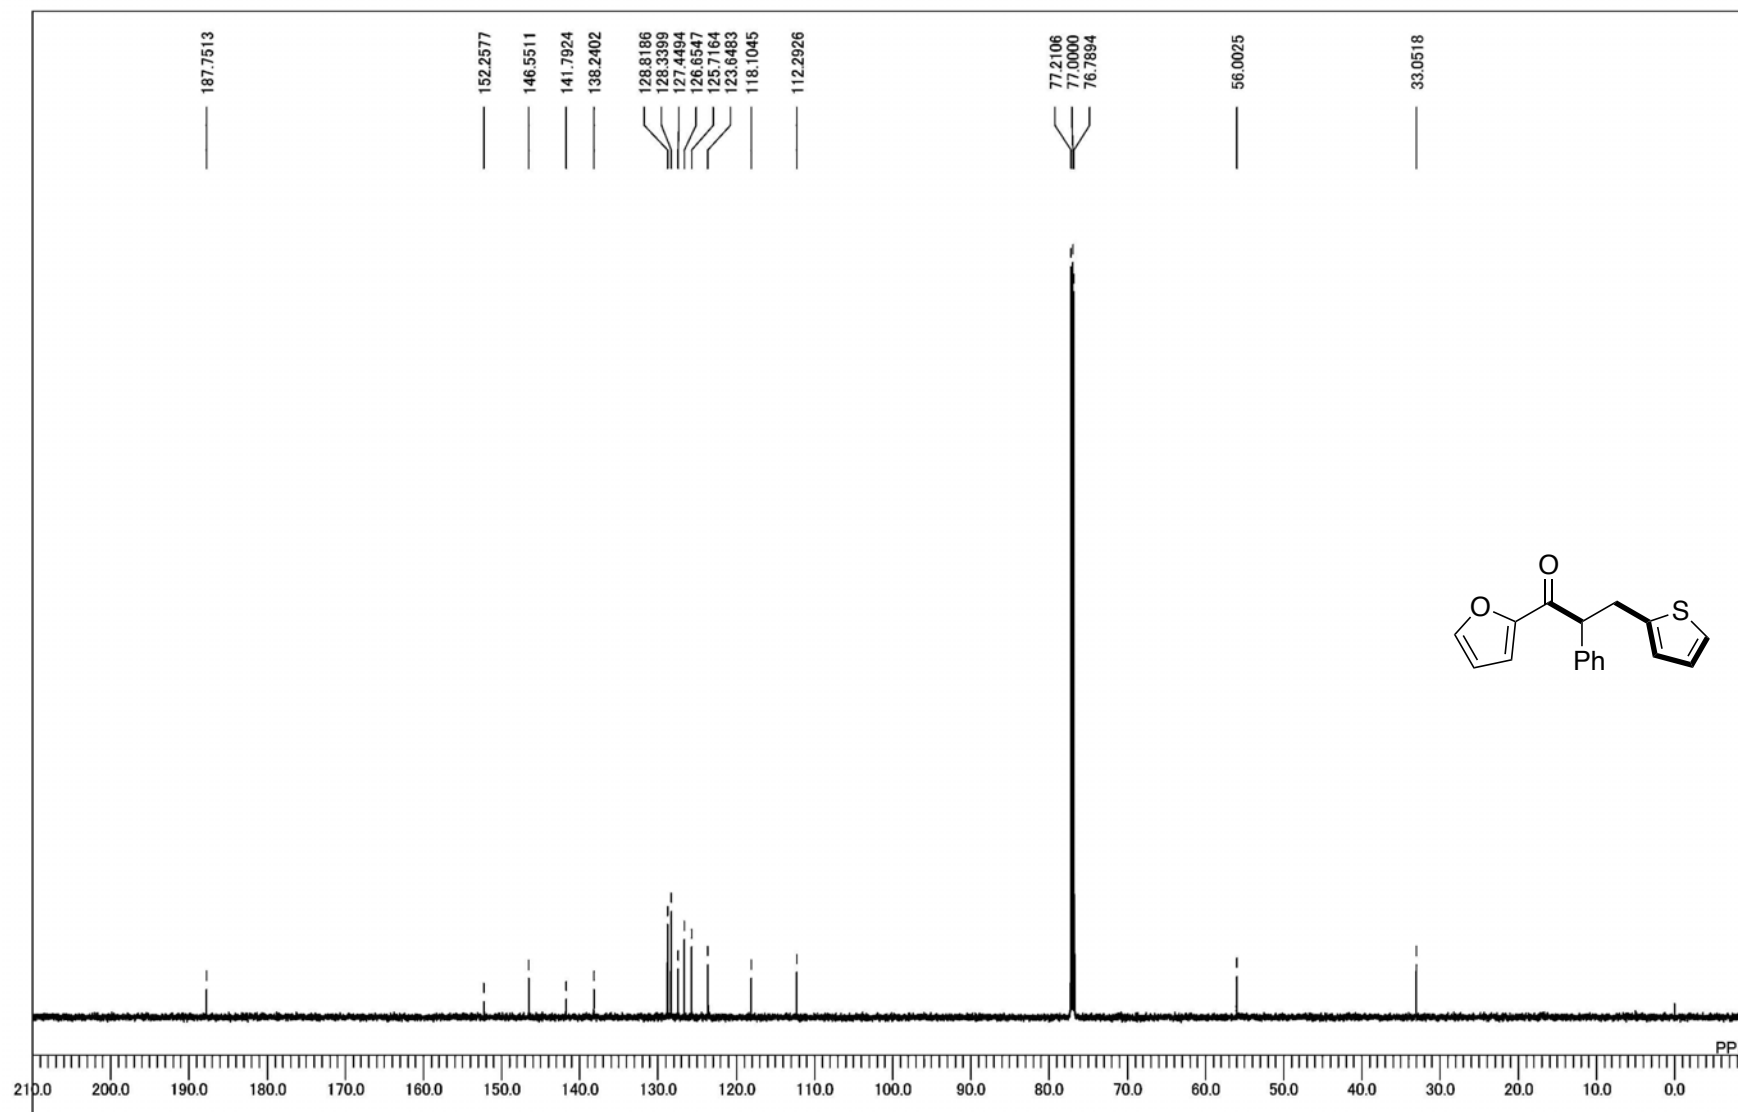

Supplementary Fig. 64 |  $^{13}\text{C}$  NMR spectrum of **6kag**

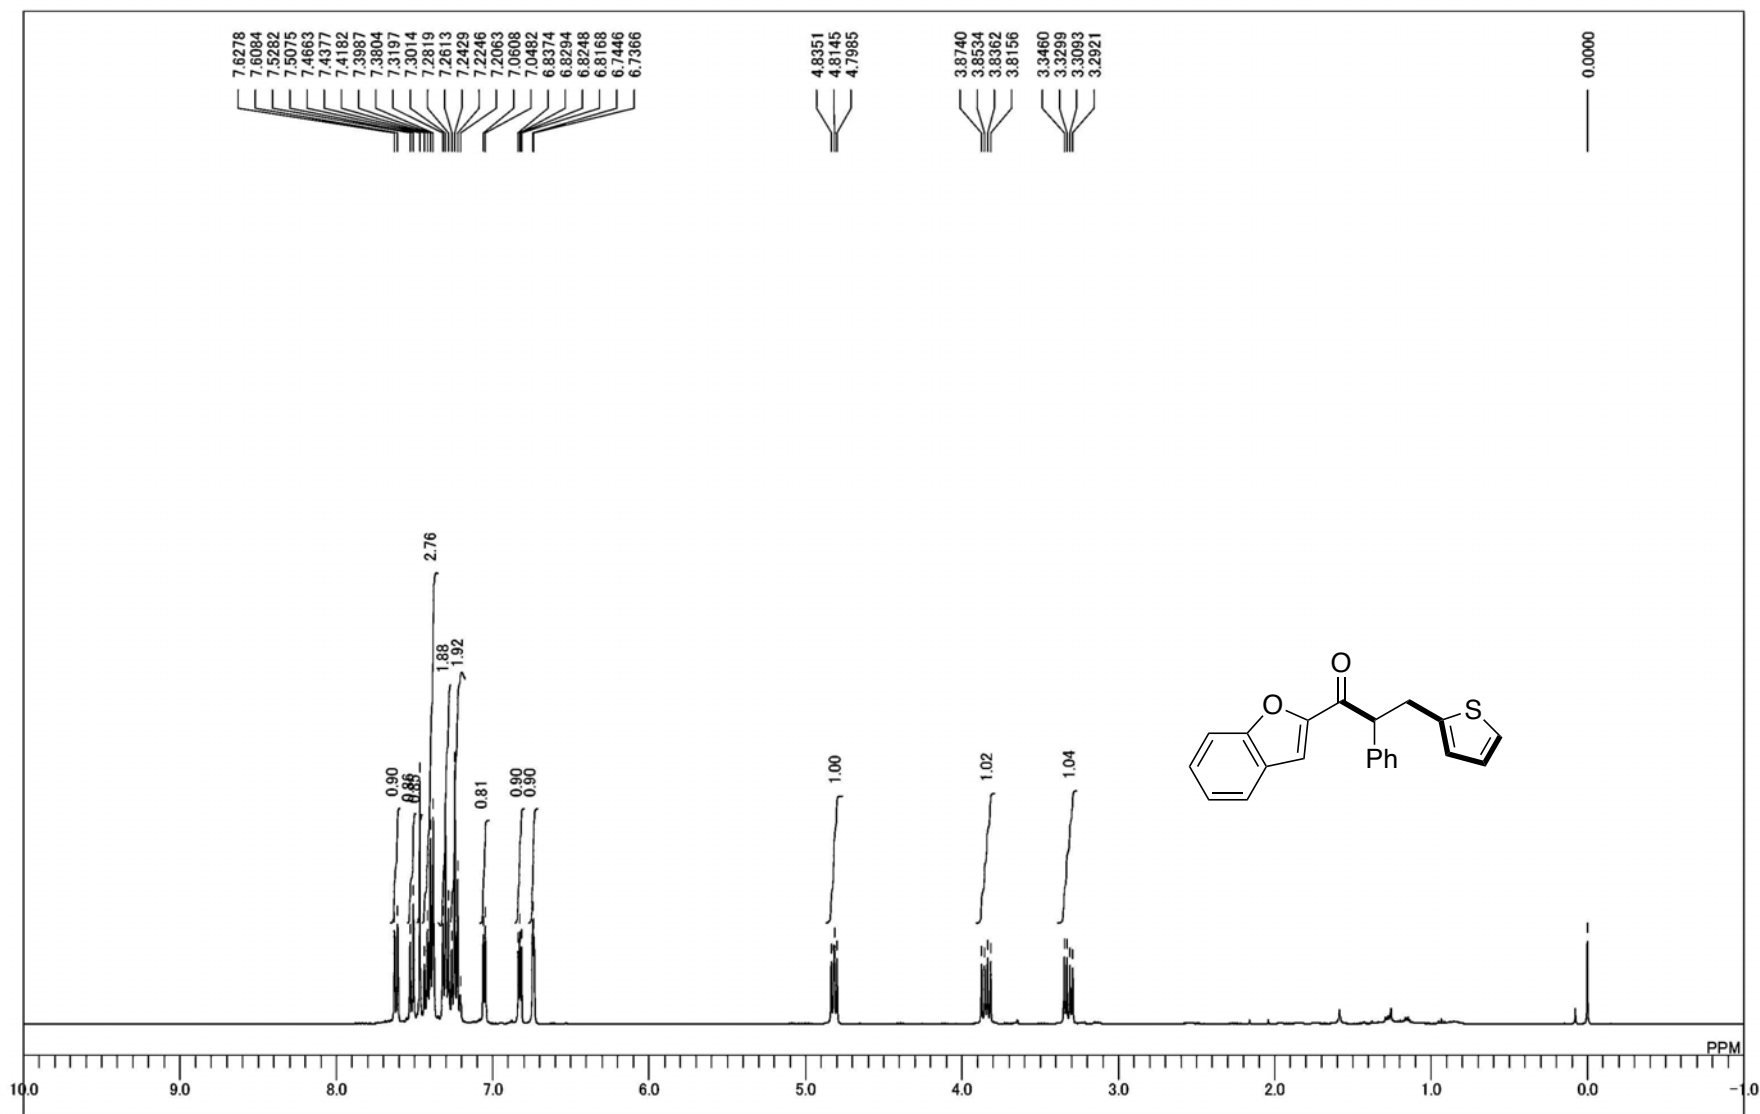

Supplementary Fig. 65 |  $^1\text{H}$  NMR spectrum of **6lag**

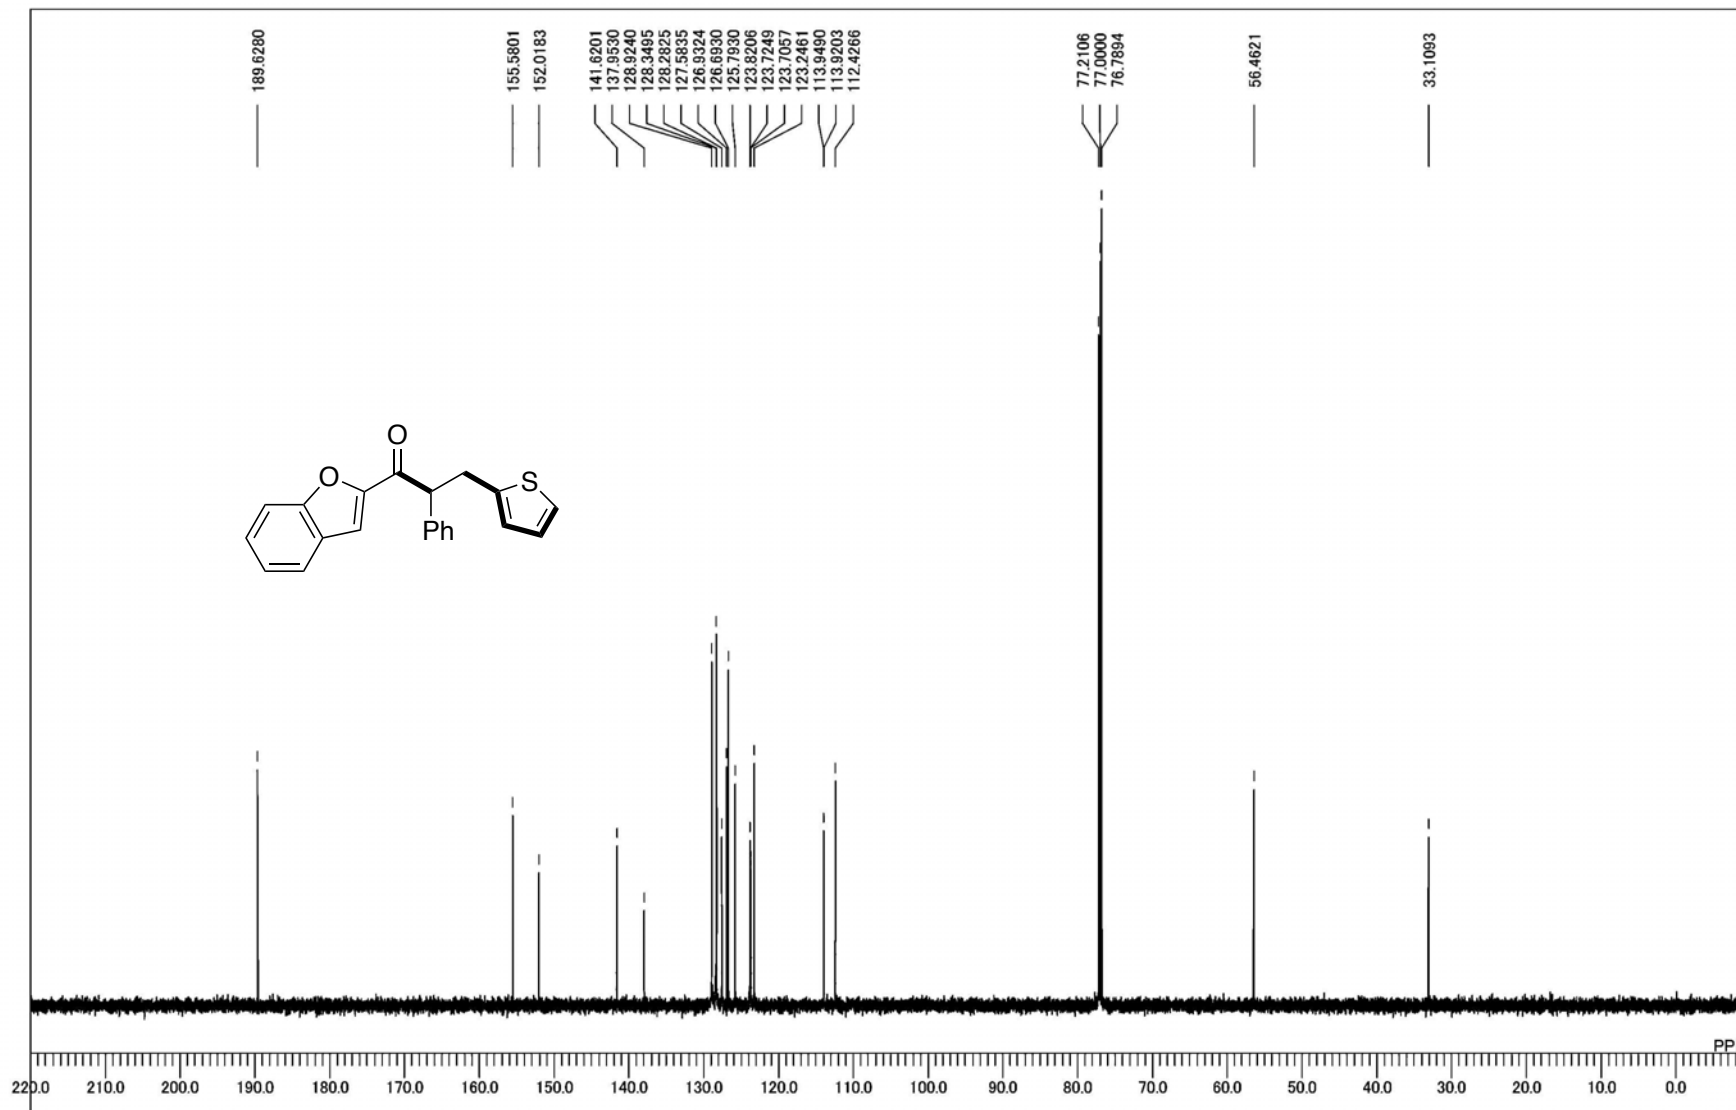

Supplementary Fig. 66 |  $^{13}\text{C}$  NMR spectrum of **6lag**

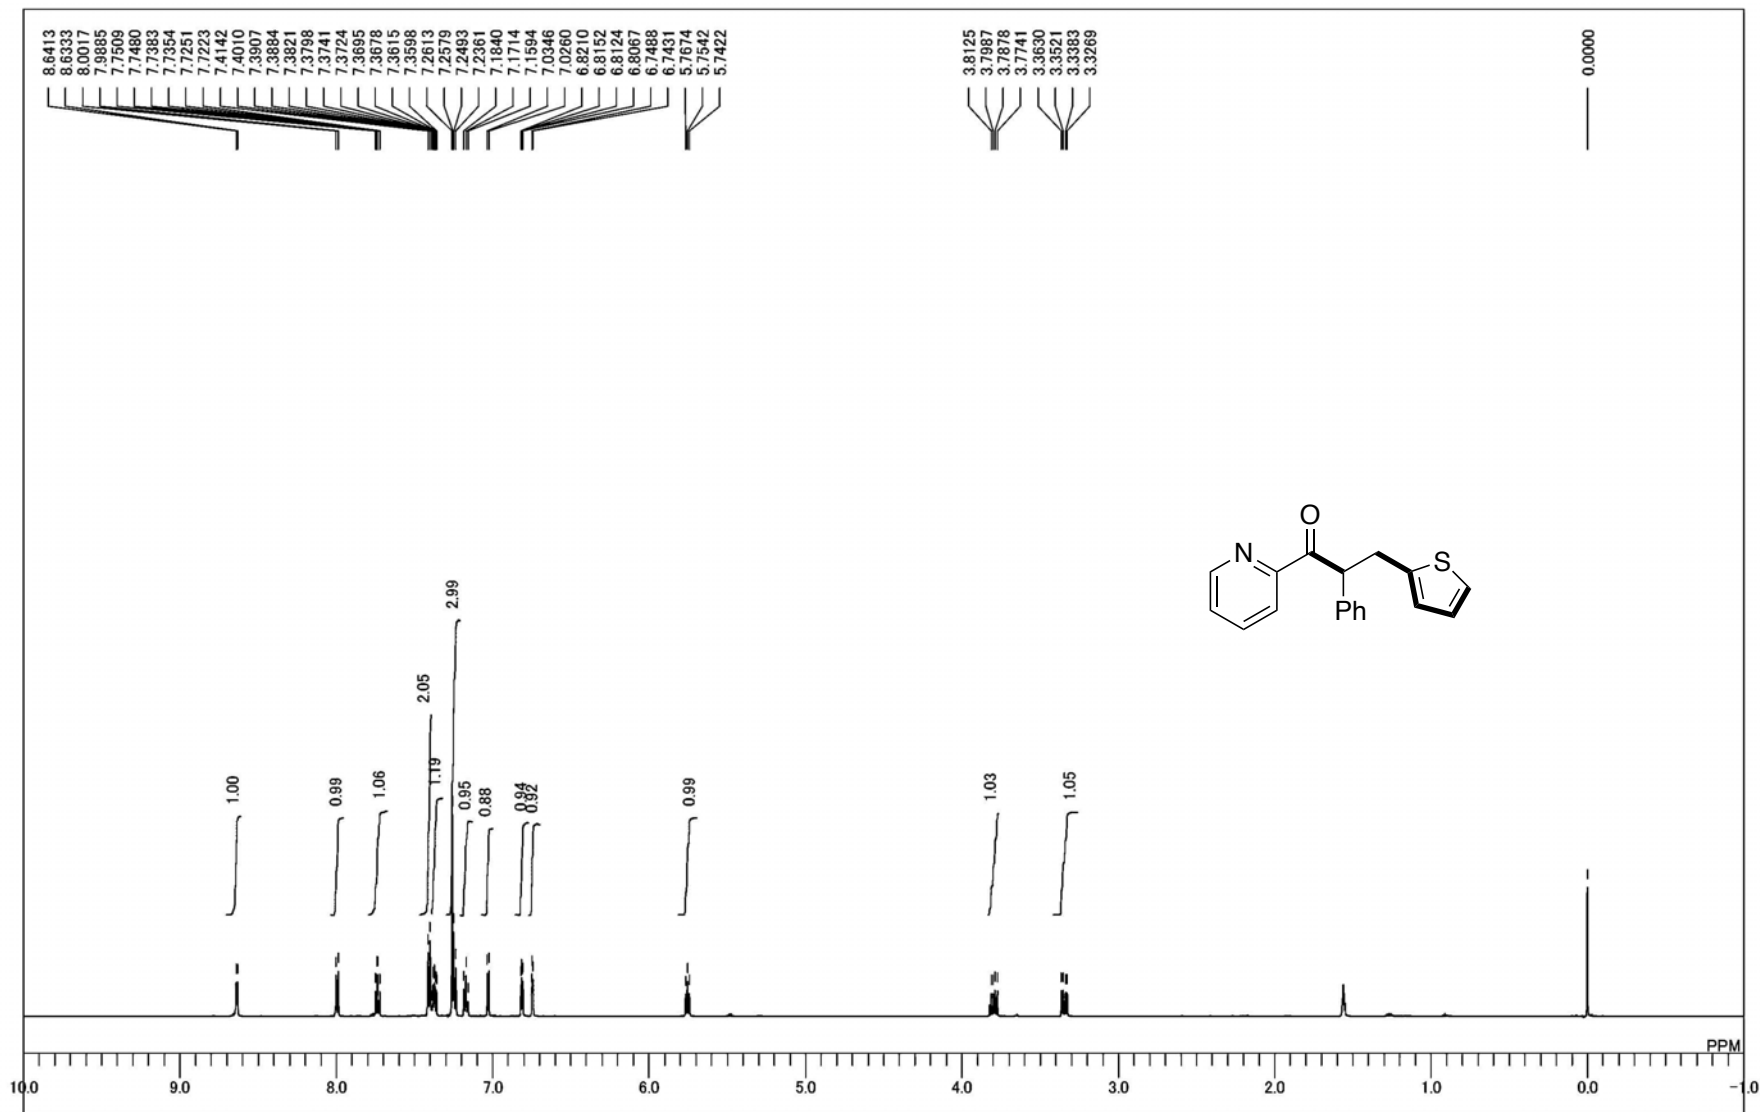

Supplementary Fig. 67 | <sup>1</sup>H NMR spectrum of 6mag

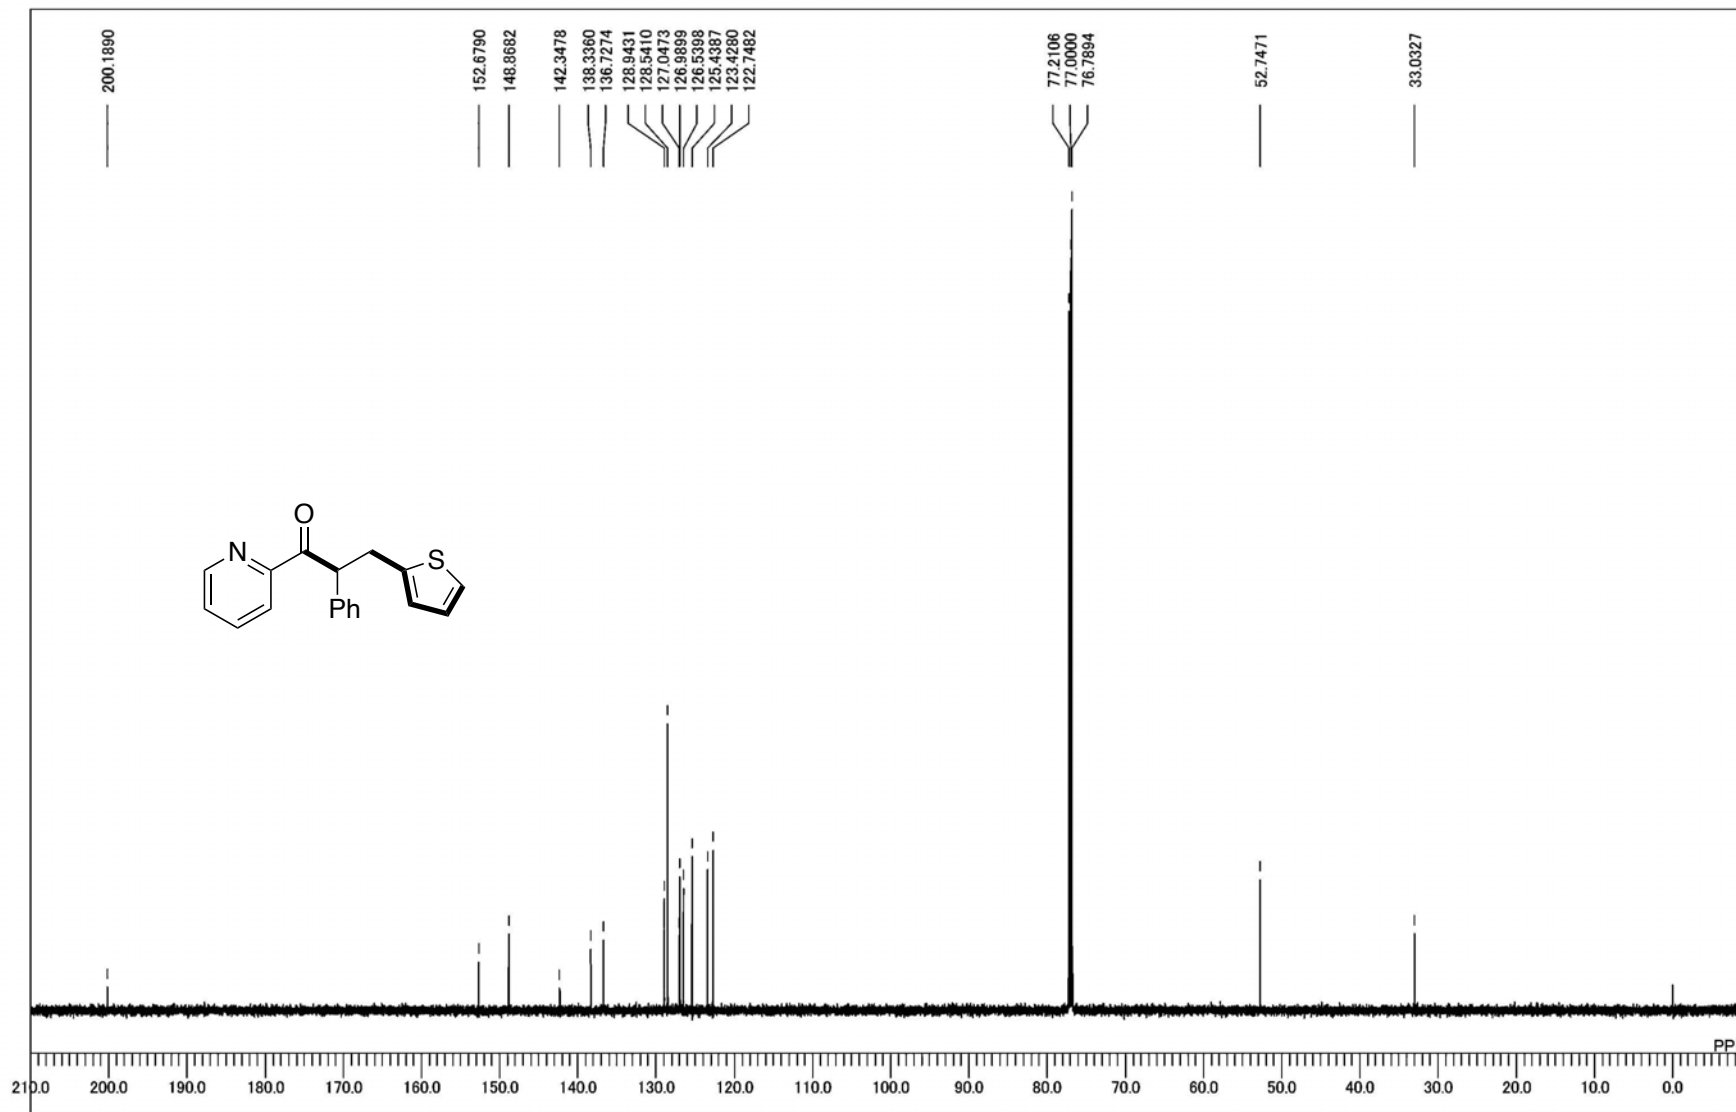

Supplementary Fig. 68 | <sup>13</sup>C NMR spectrum of 6mag

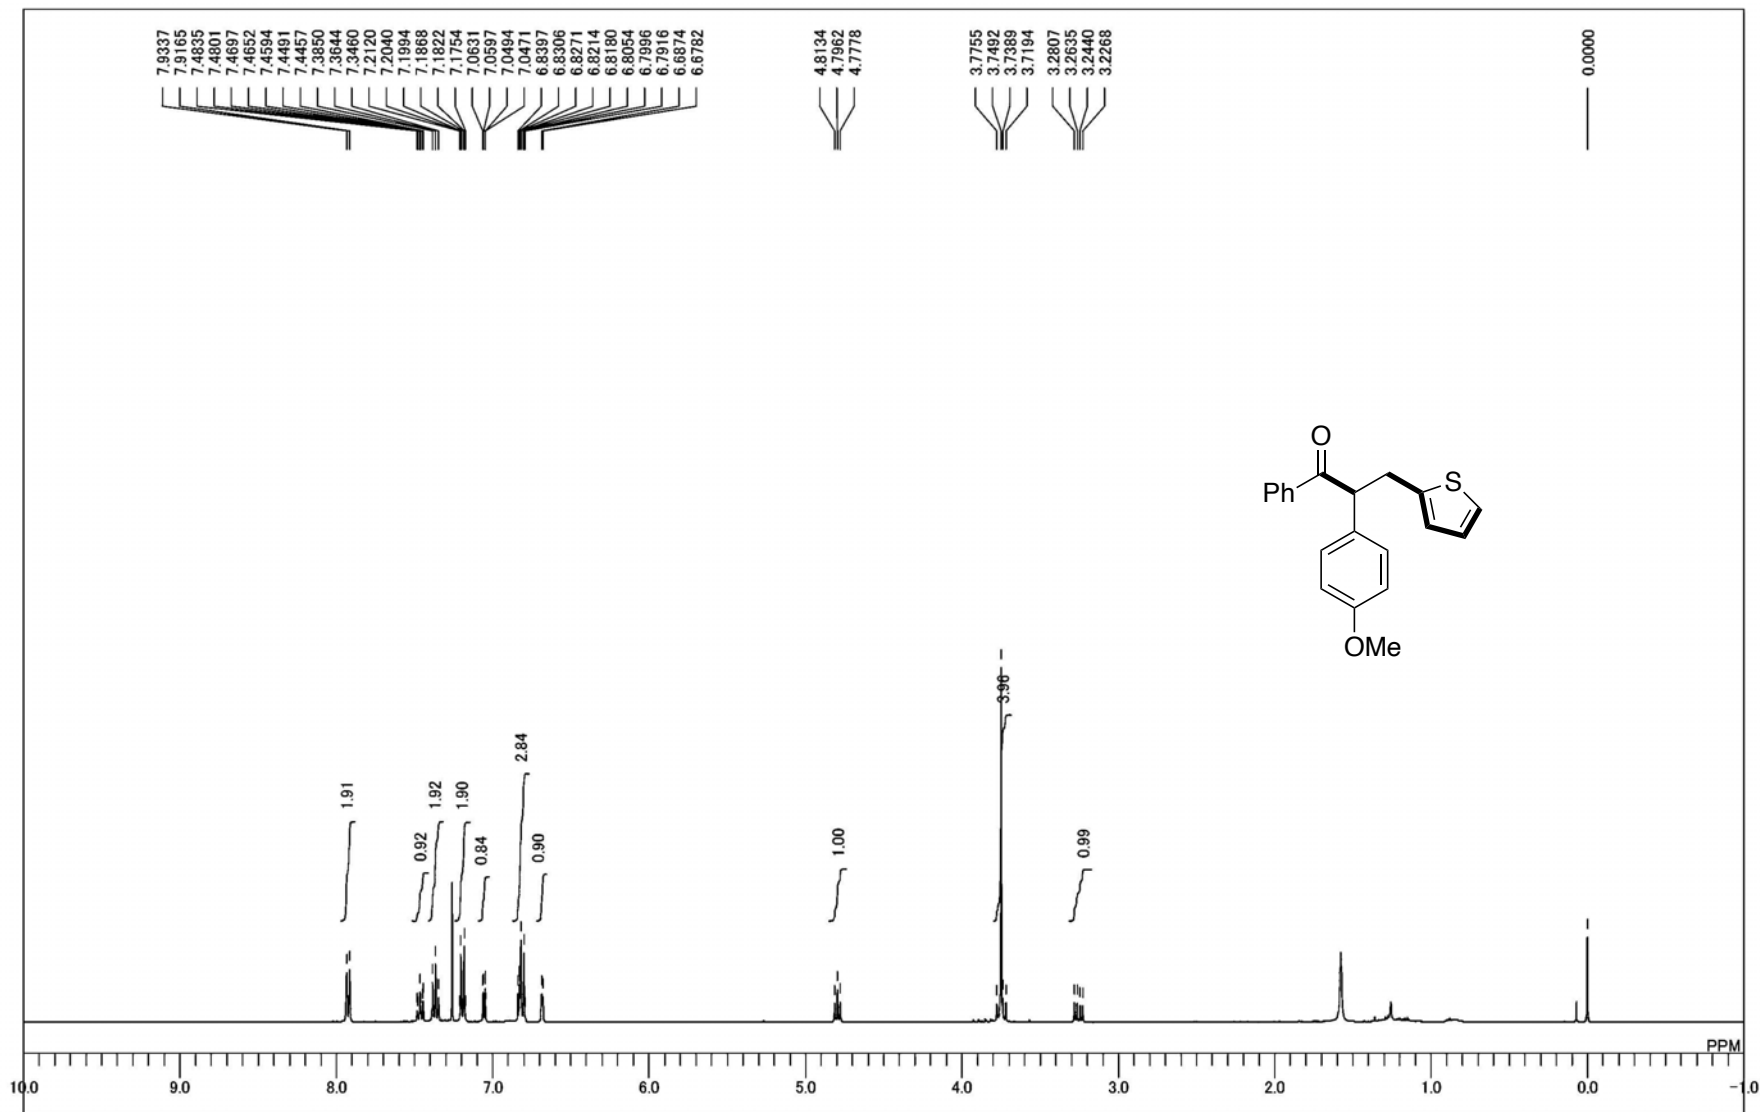

Supplementary Fig. 69 |  $^1\text{H}$  NMR spectrum of 6abg

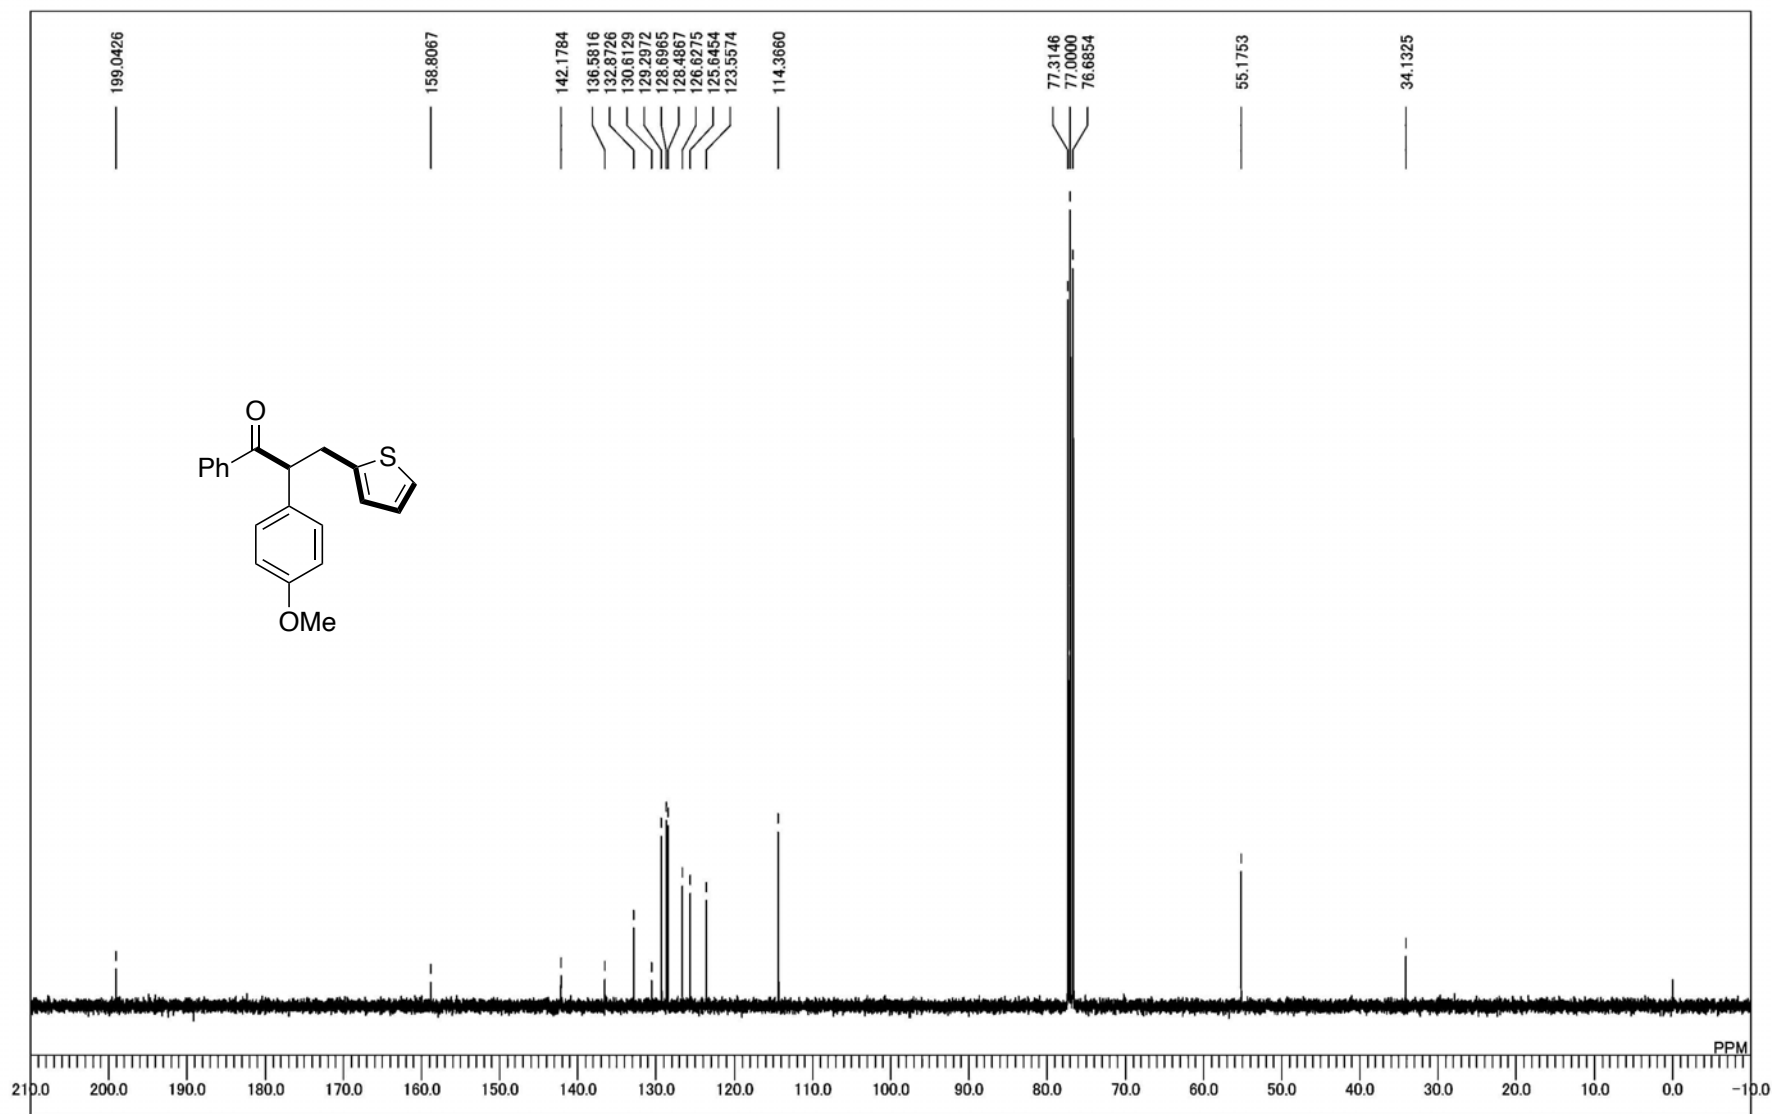

Supplementary Fig. 70 |  $^{13}\text{C}$  NMR spectrum of **6abg**

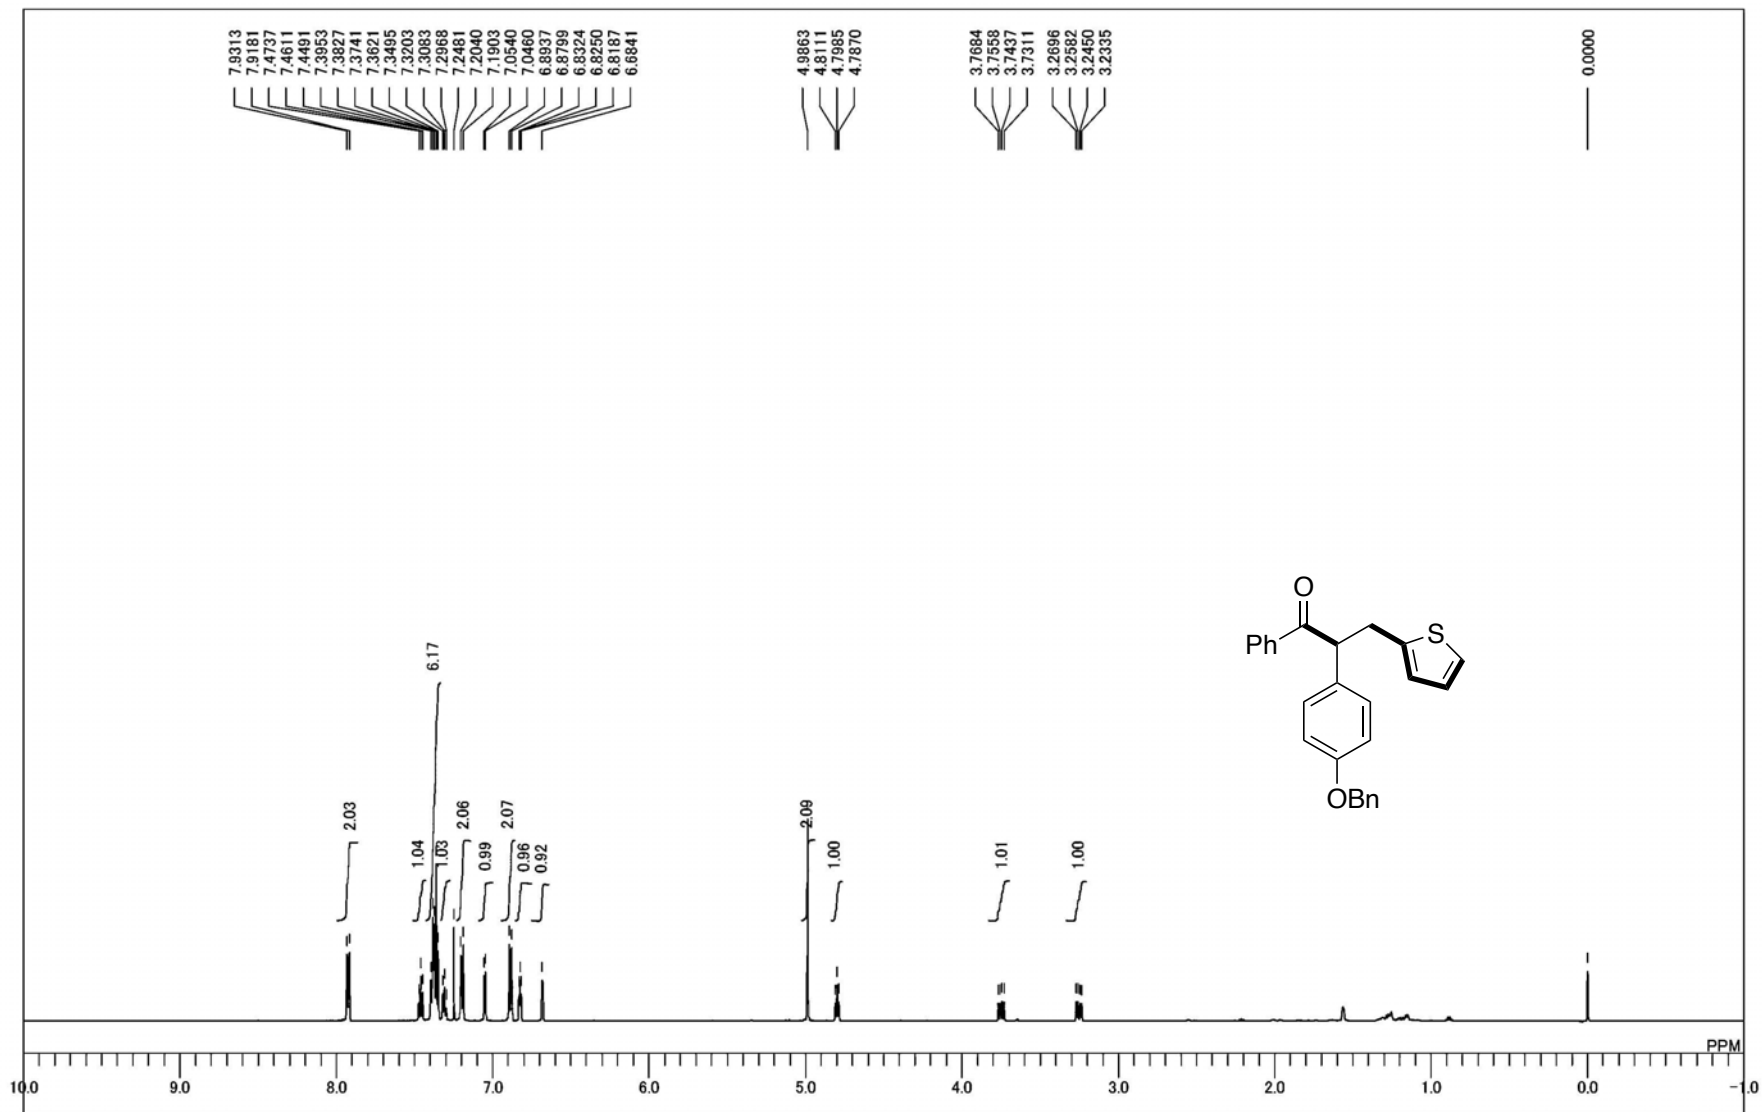

Supplementary Fig. 71 | <sup>1</sup>H NMR spectrum of 6acg



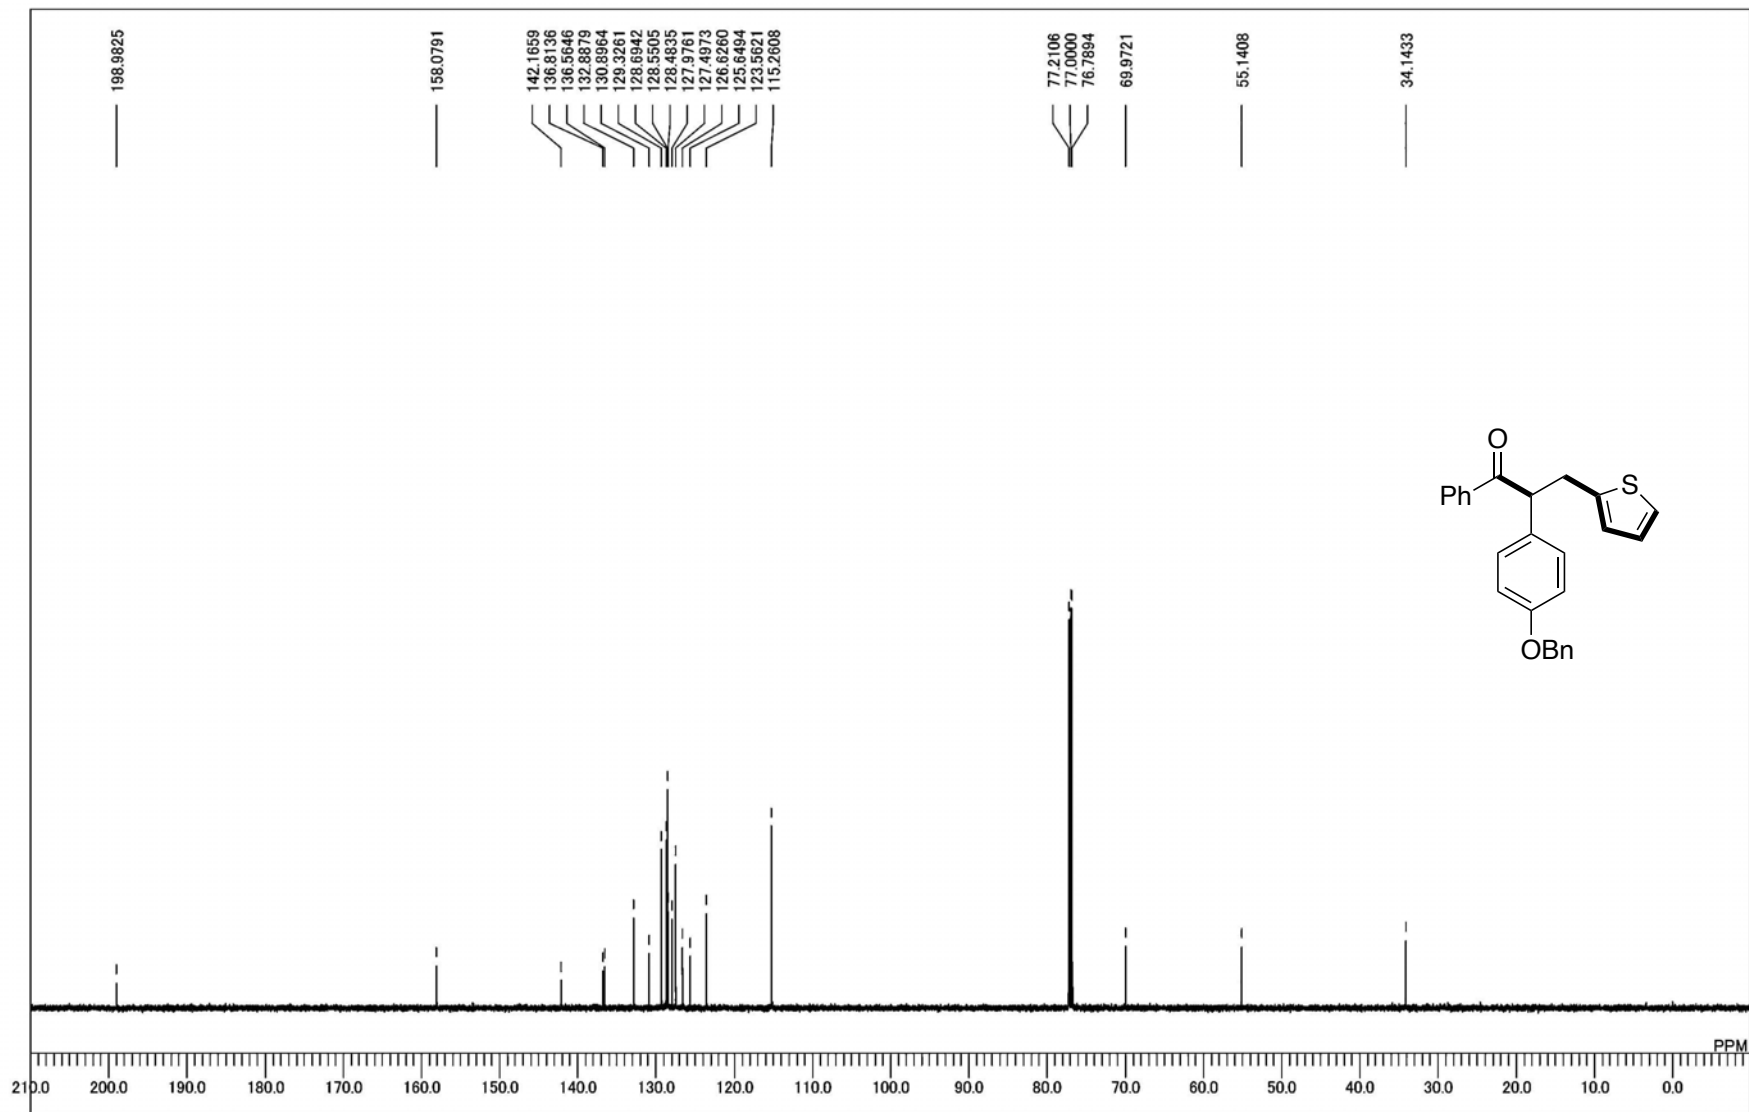

Supplementary Fig. 72 | <sup>13</sup>C NMR spectrum of **6acg**

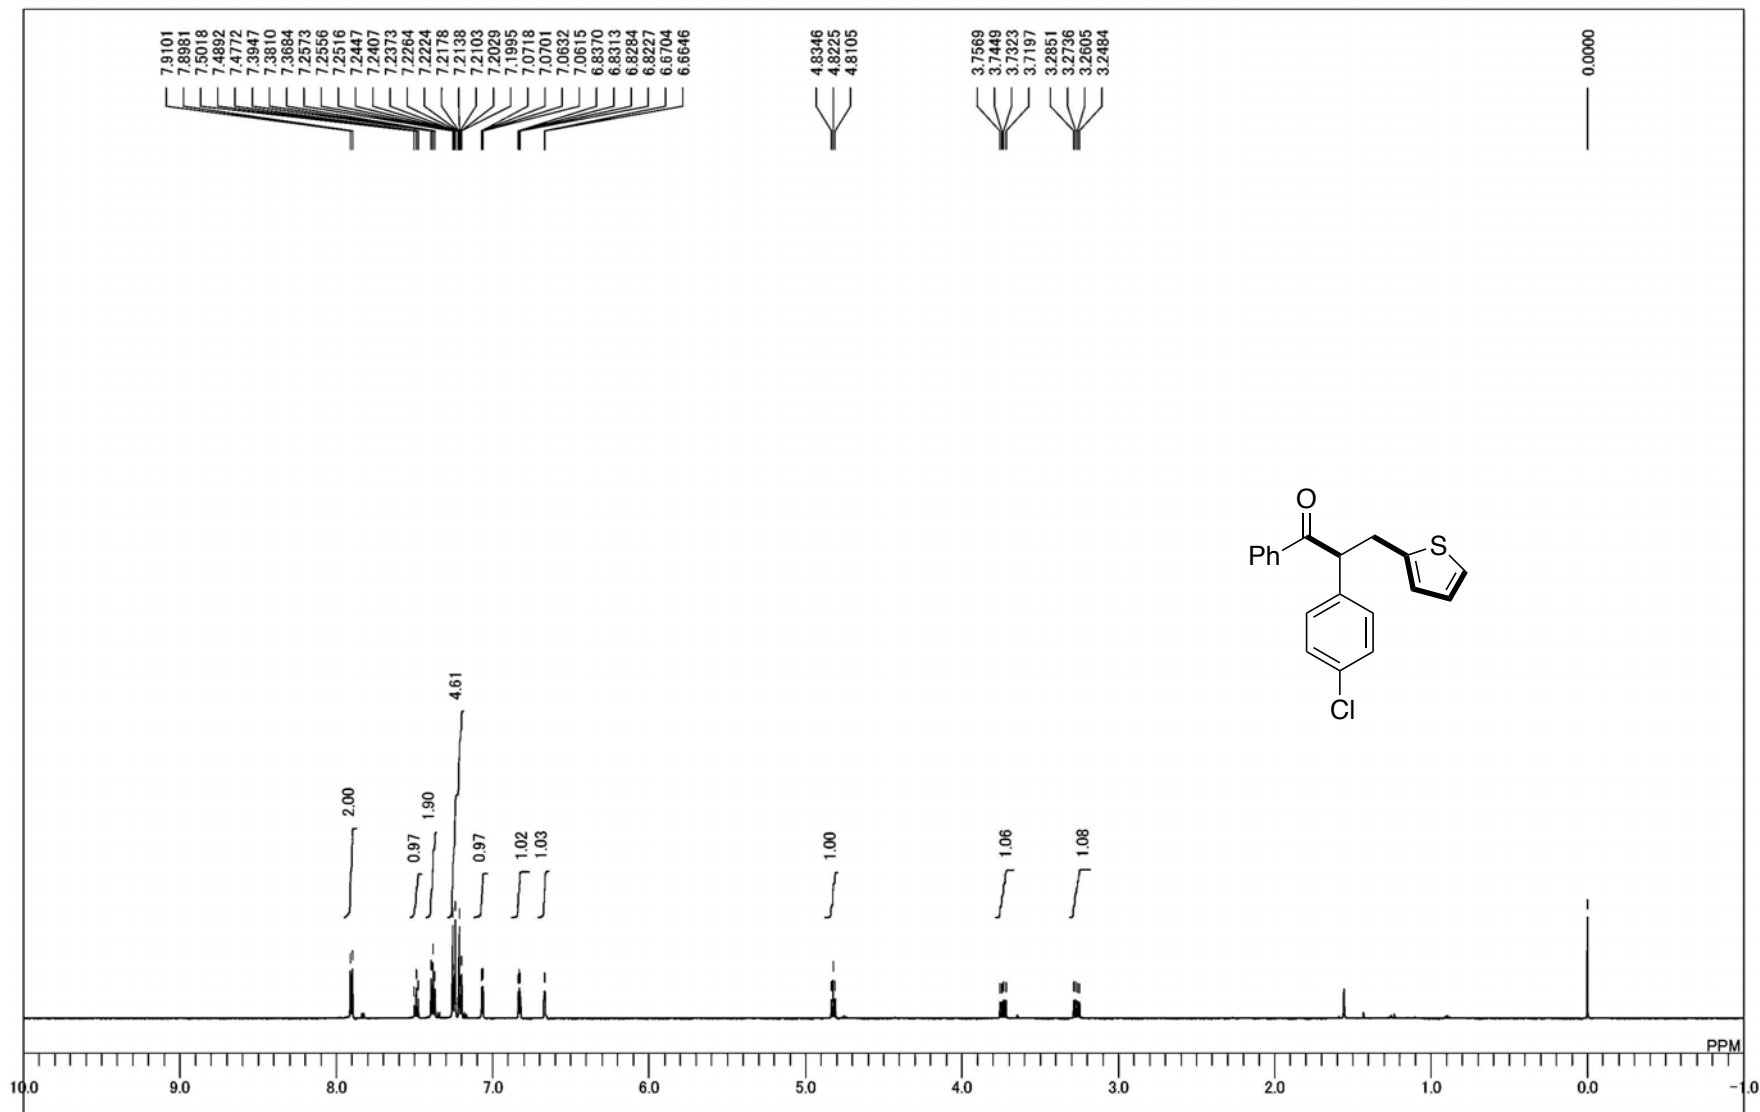

Supplementary Fig. 73 | <sup>1</sup>H NMR spectrum of 6adg

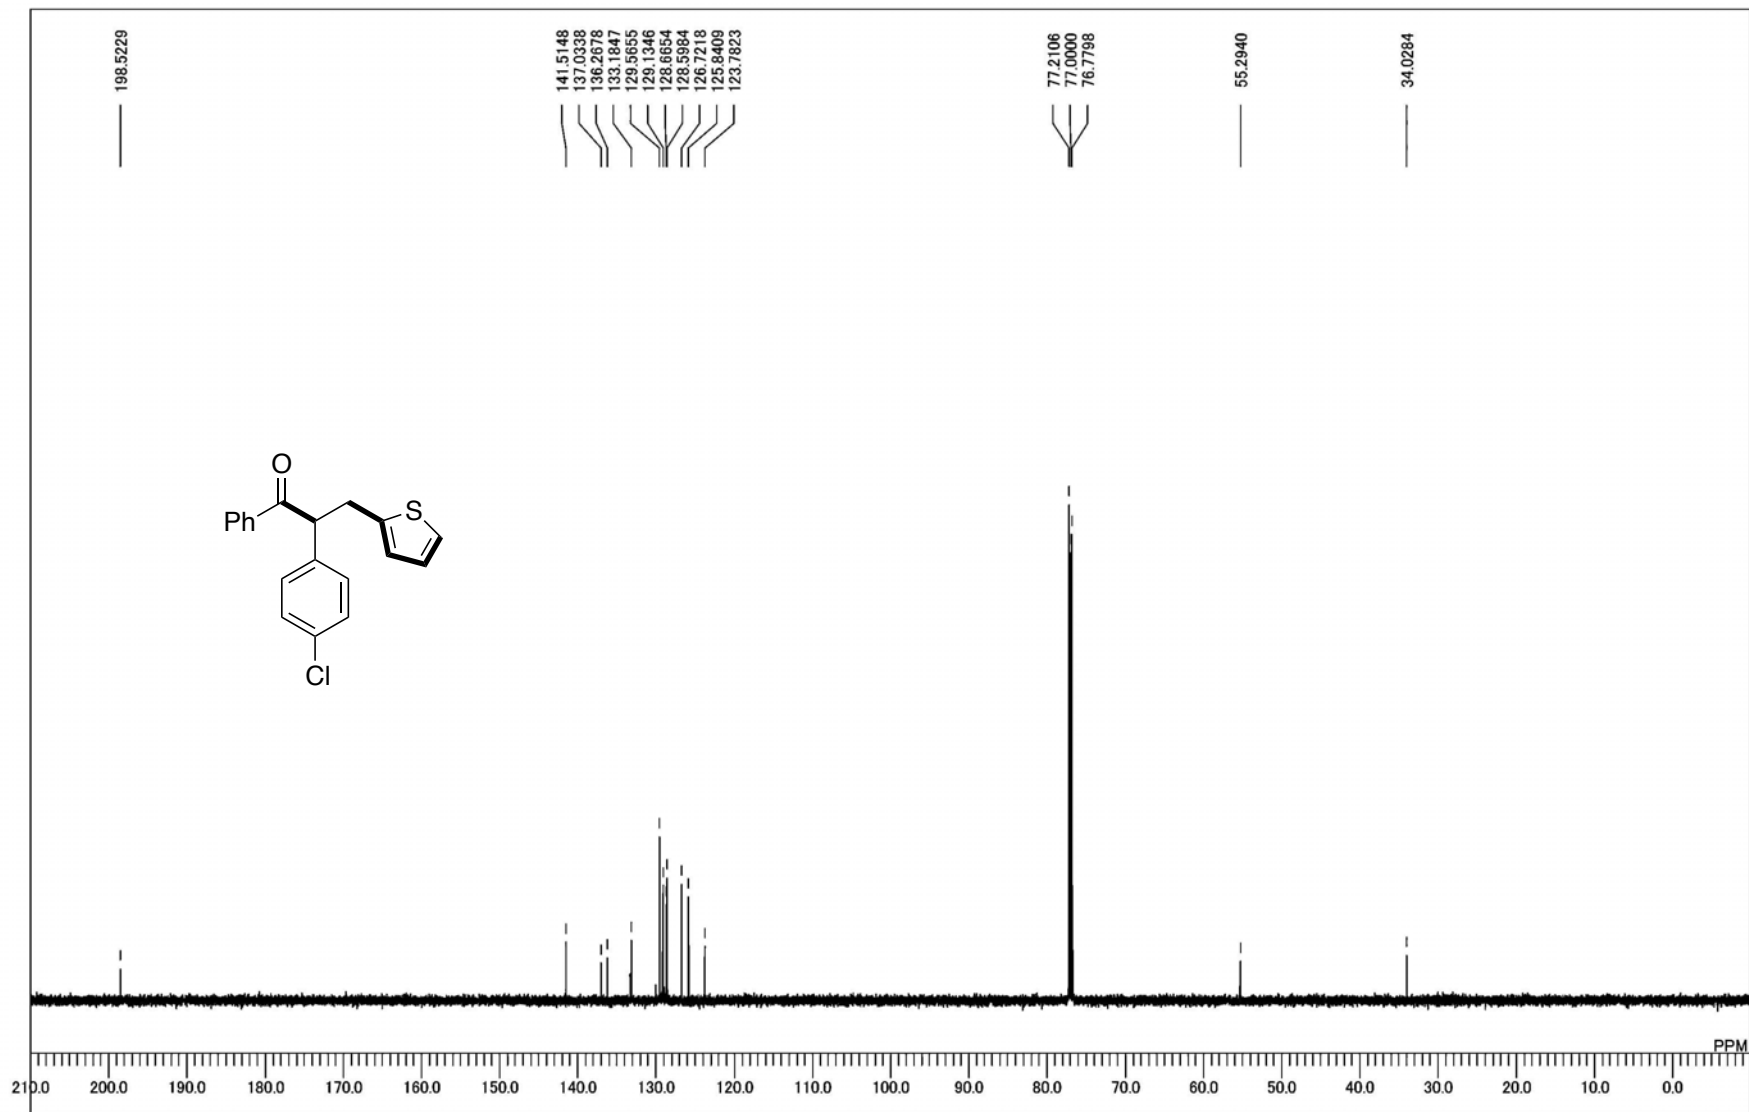

Supplementary Fig. 74 | <sup>13</sup>C NMR spectrum of 6adg

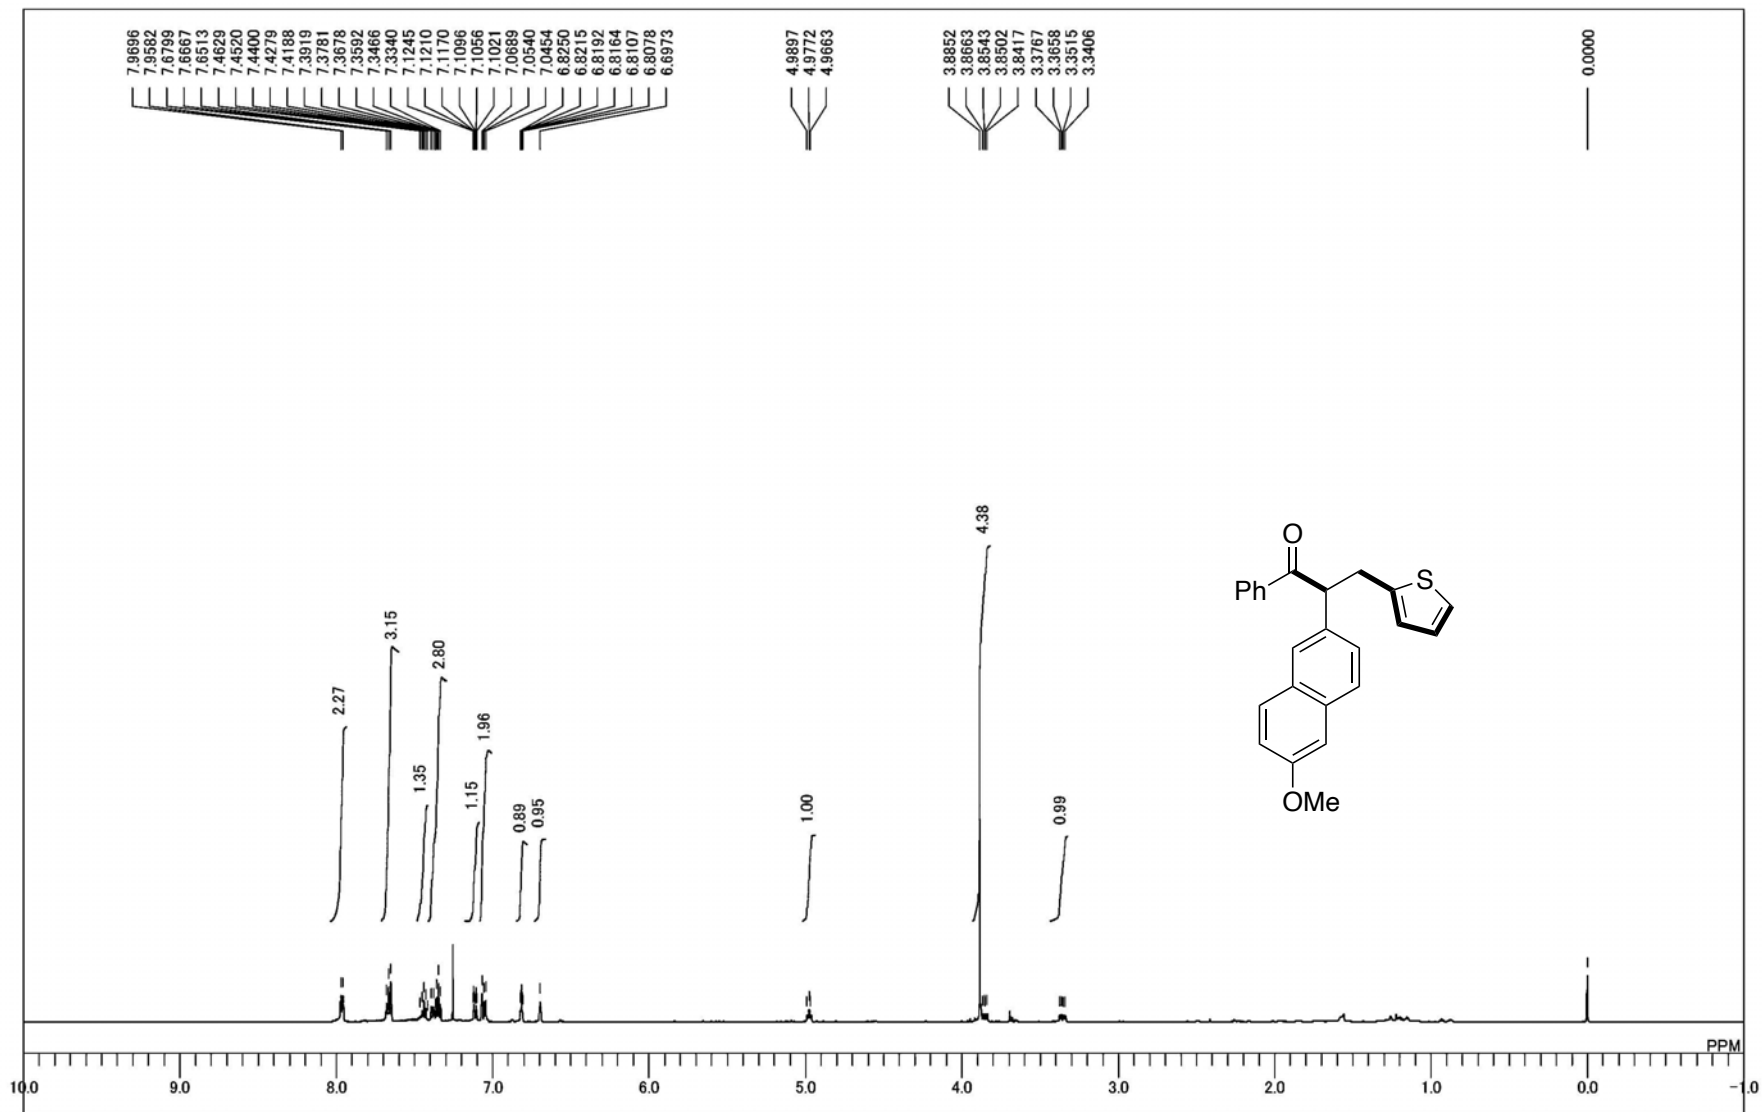

Supplementary Fig. 75 |  $^1\text{H}$  NMR spectrum of 6aeg

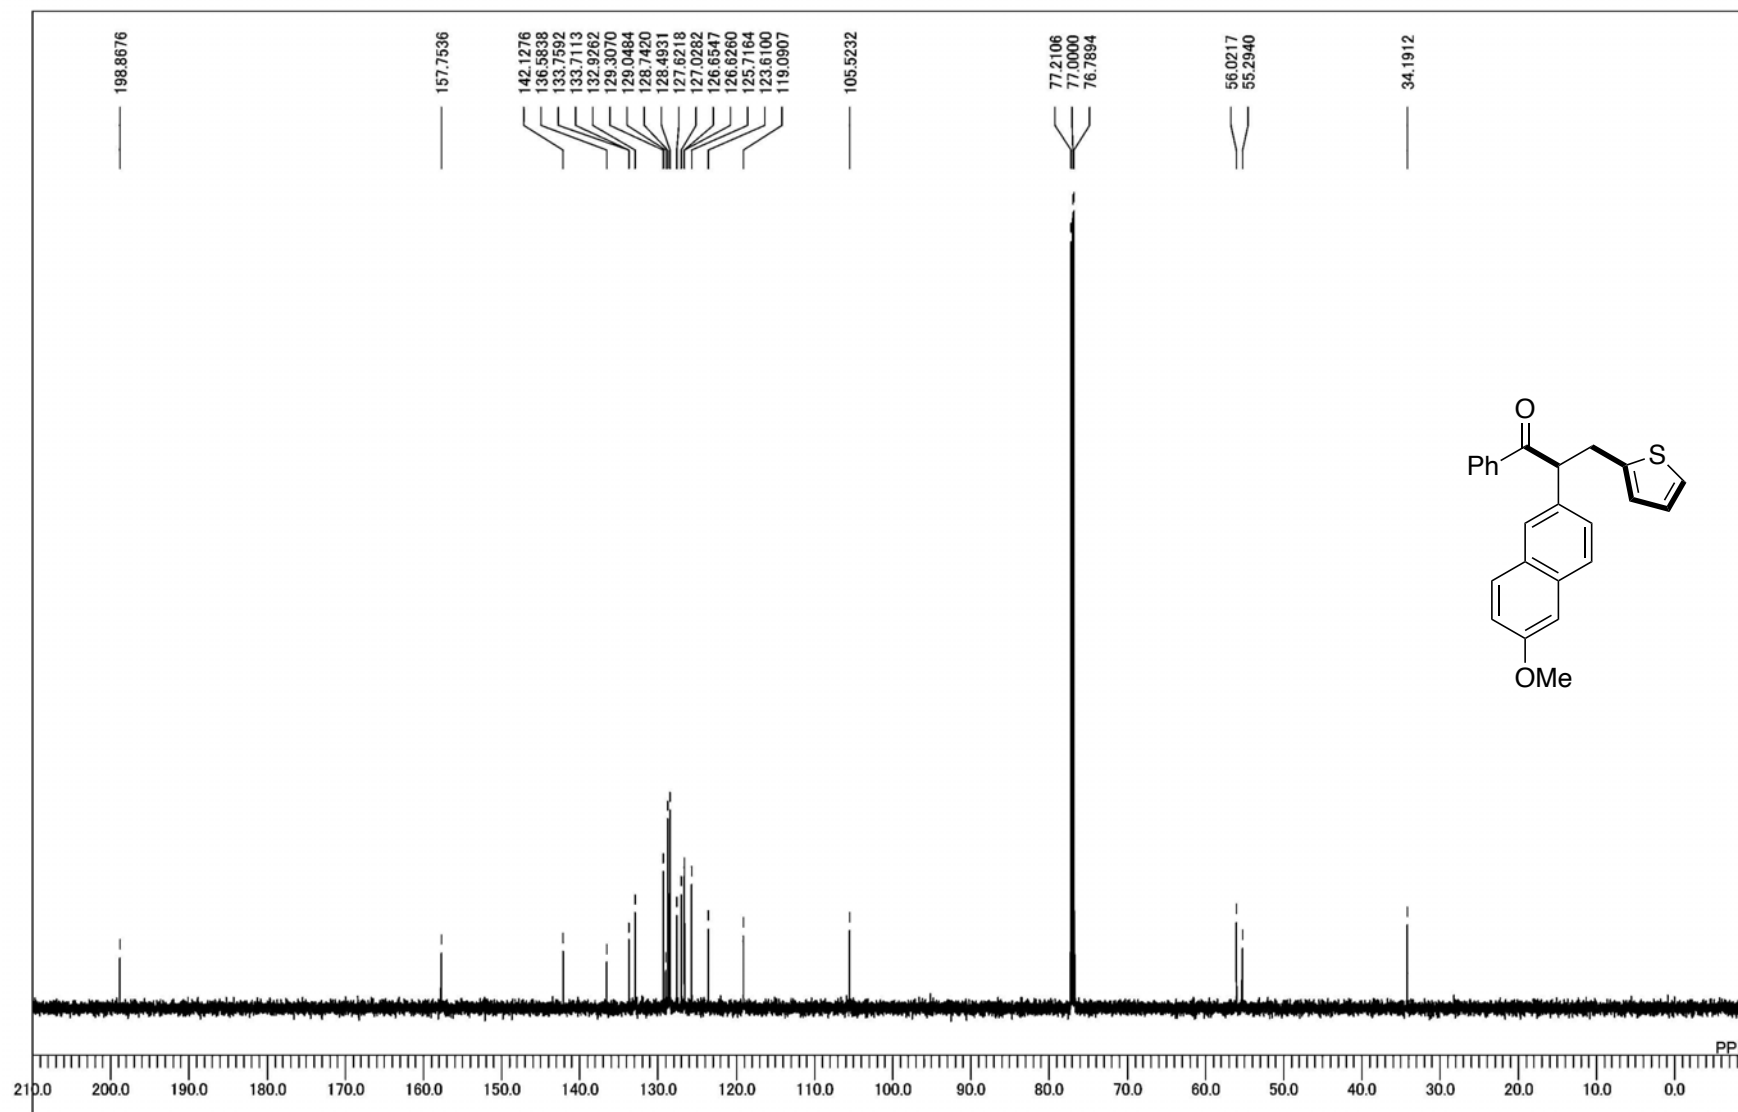

Supplementary Fig. 76 | <sup>13</sup>C NMR spectrum of **6aeg**

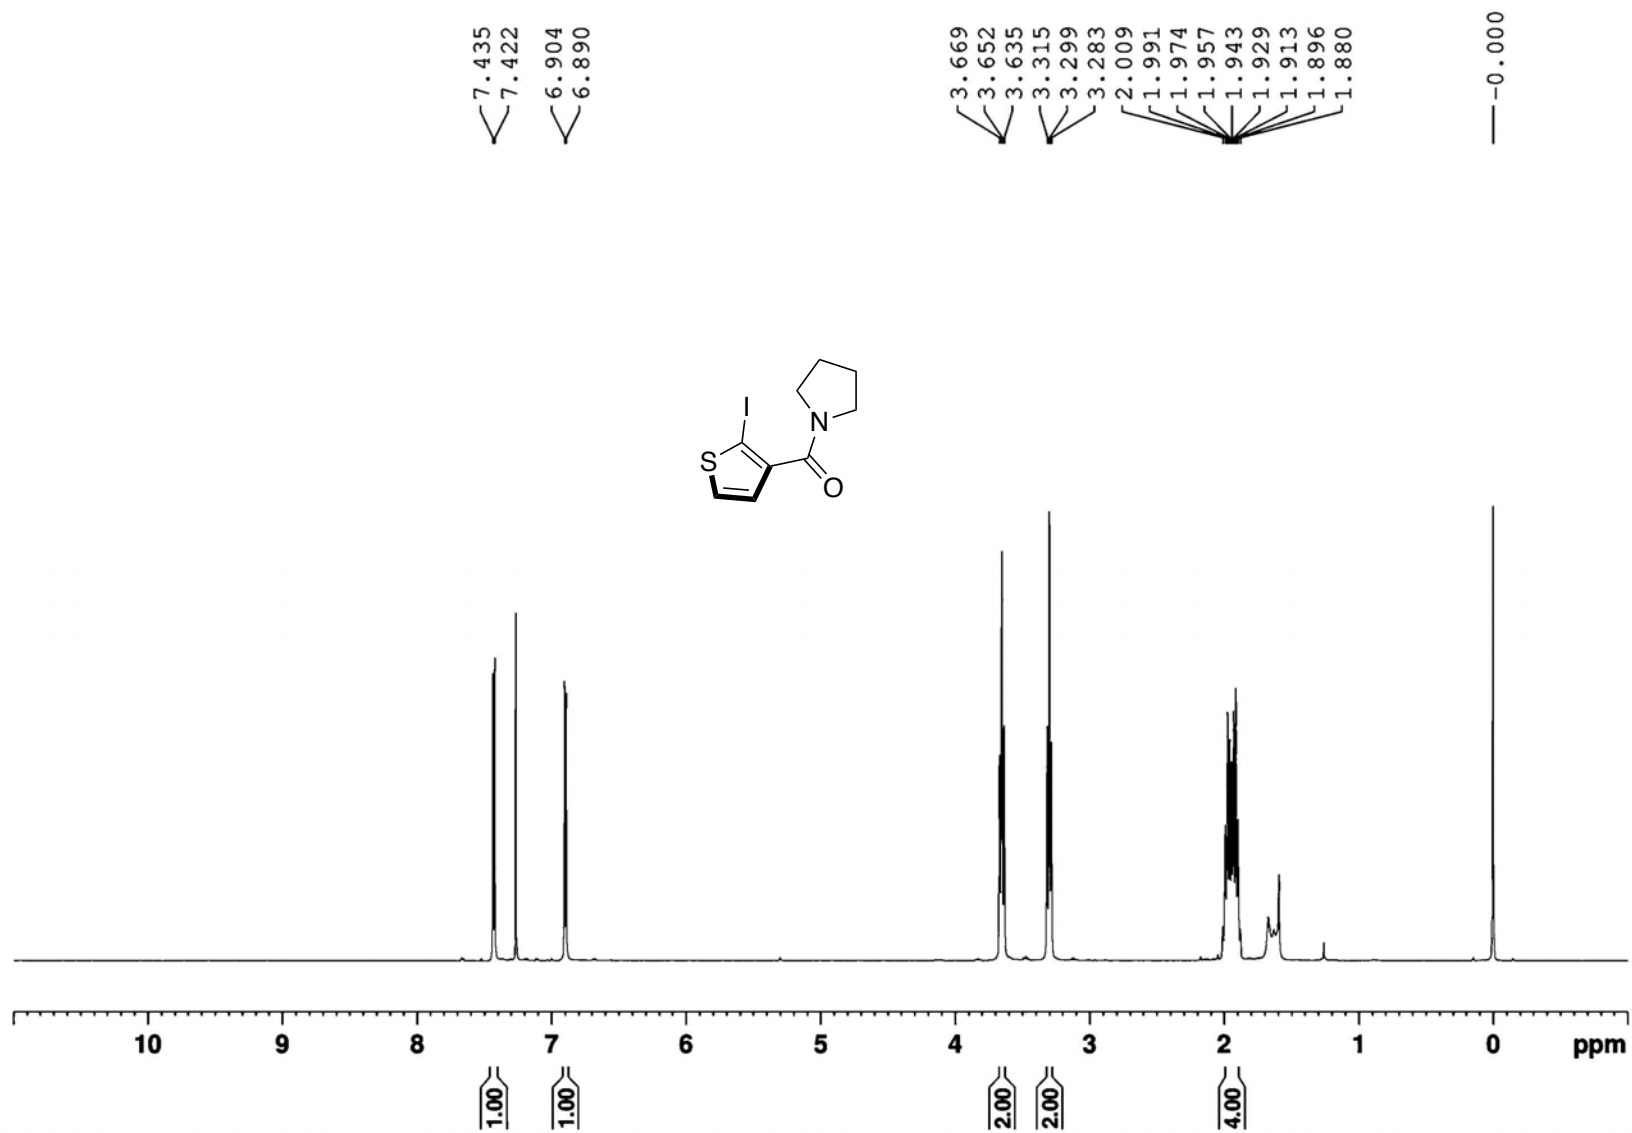

Supplementary Fig. 77 | <sup>1</sup>H NMR spectrum of 7a

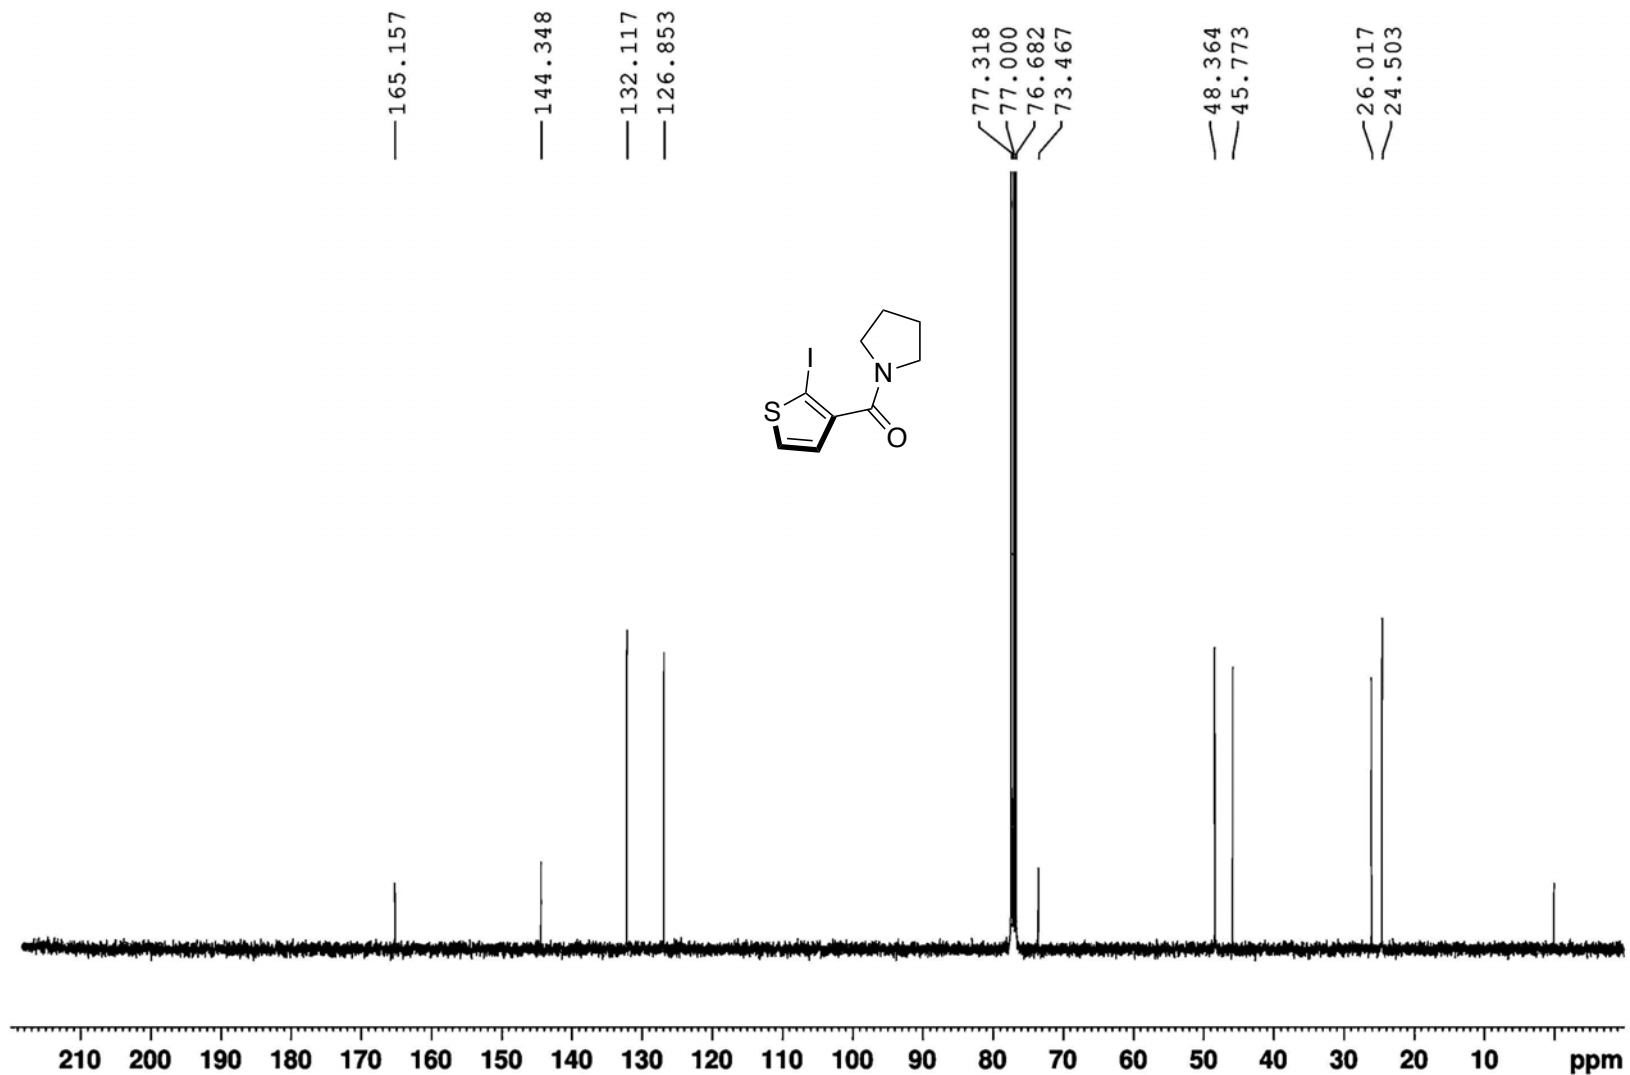

Supplementary Fig. 78 |  $^{13}\text{C}$  NMR spectrum of 7a

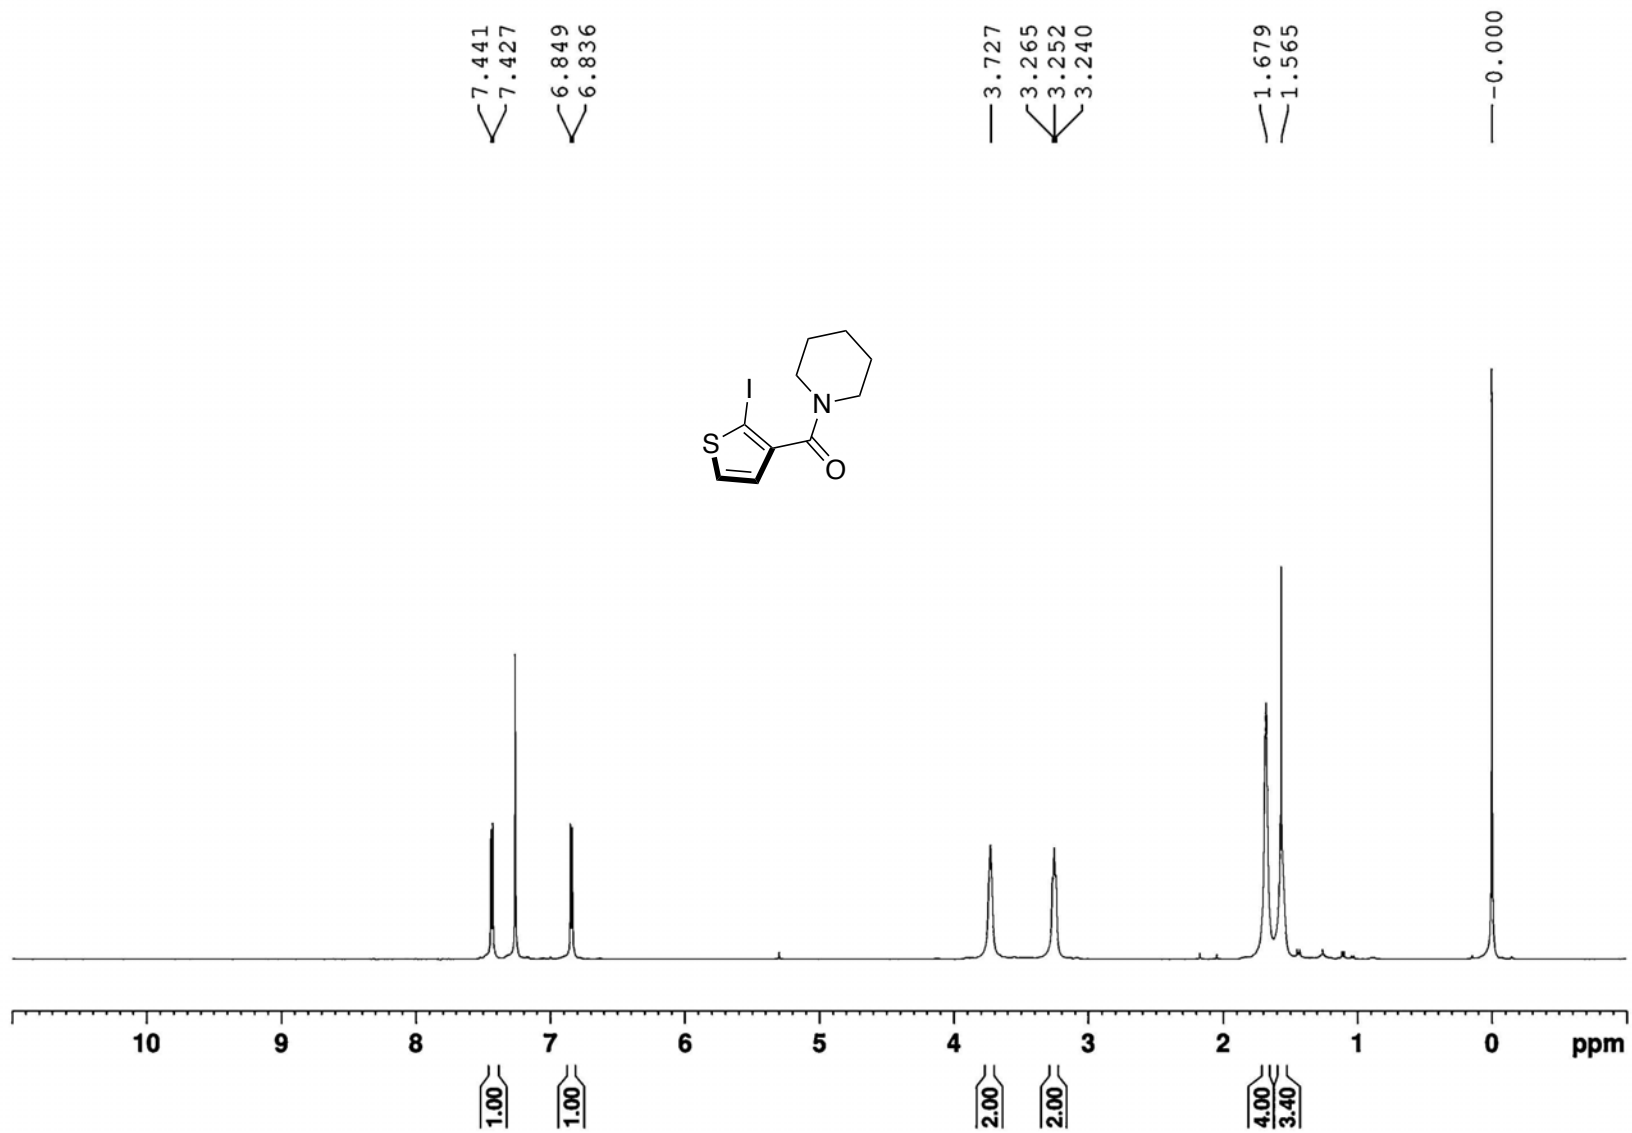

Supplementary Fig. 79 | <sup>1</sup>H NMR spectrum of 7b



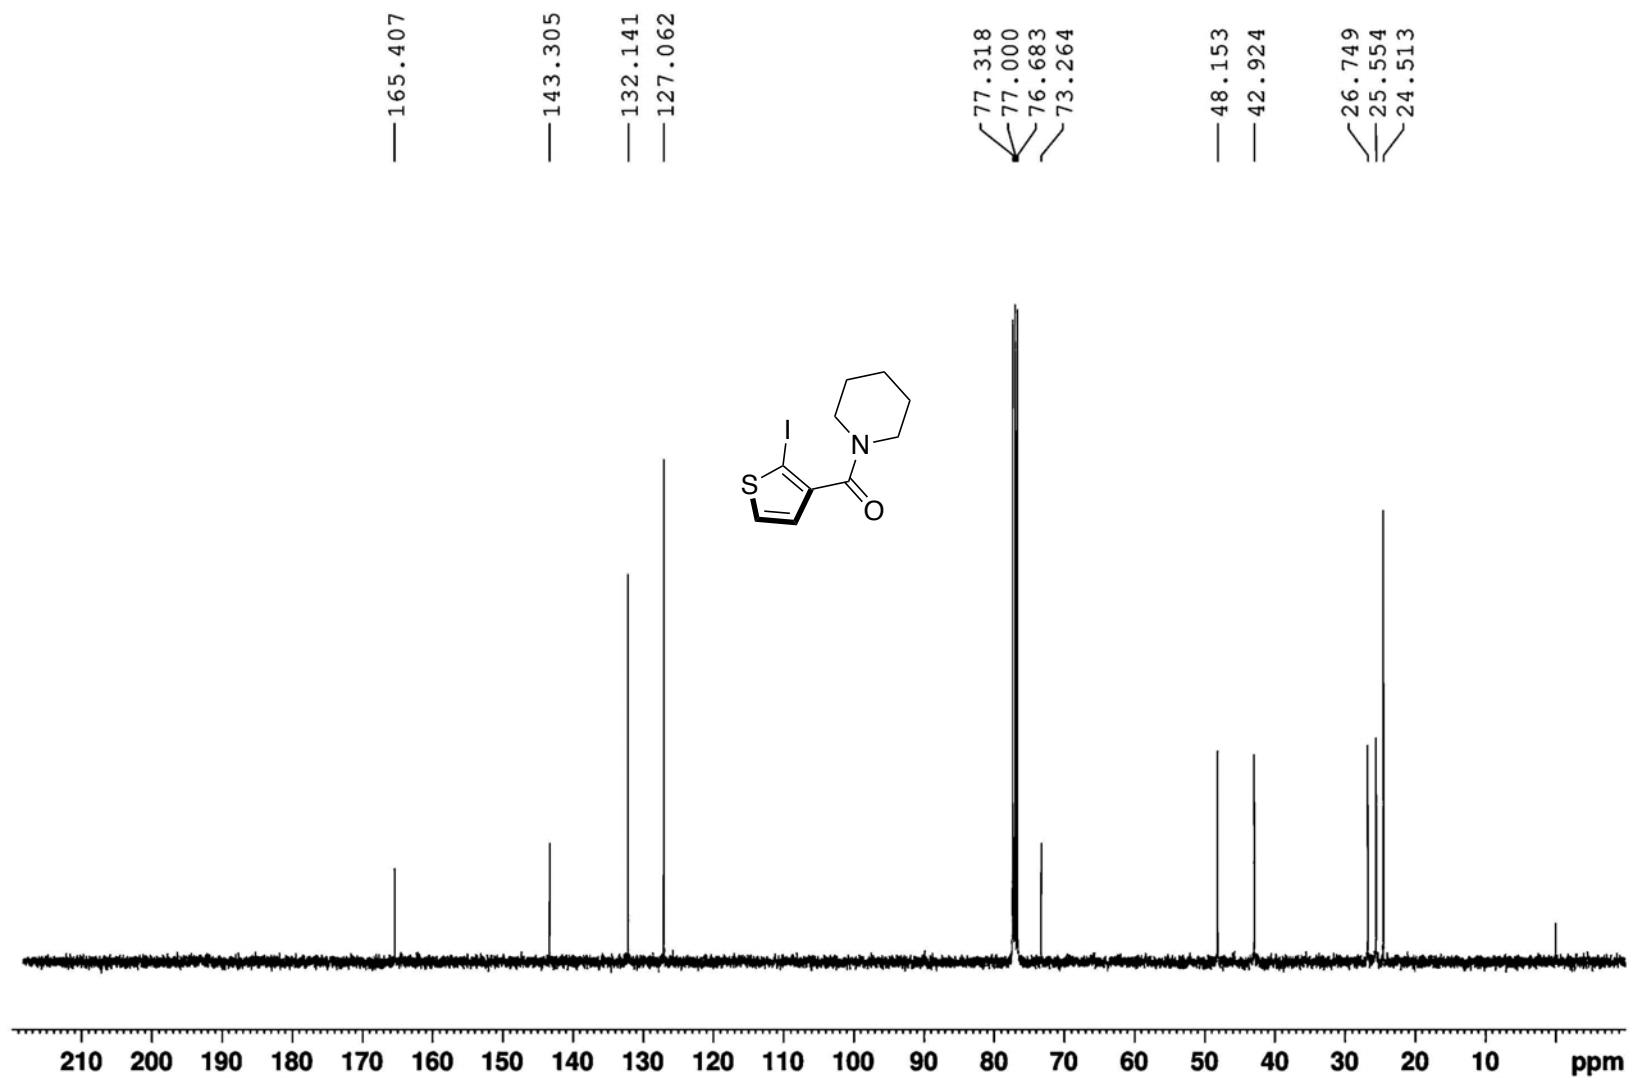

Supplementary Fig. 80 |  $^{13}\text{C}$  NMR spectrum of 7b

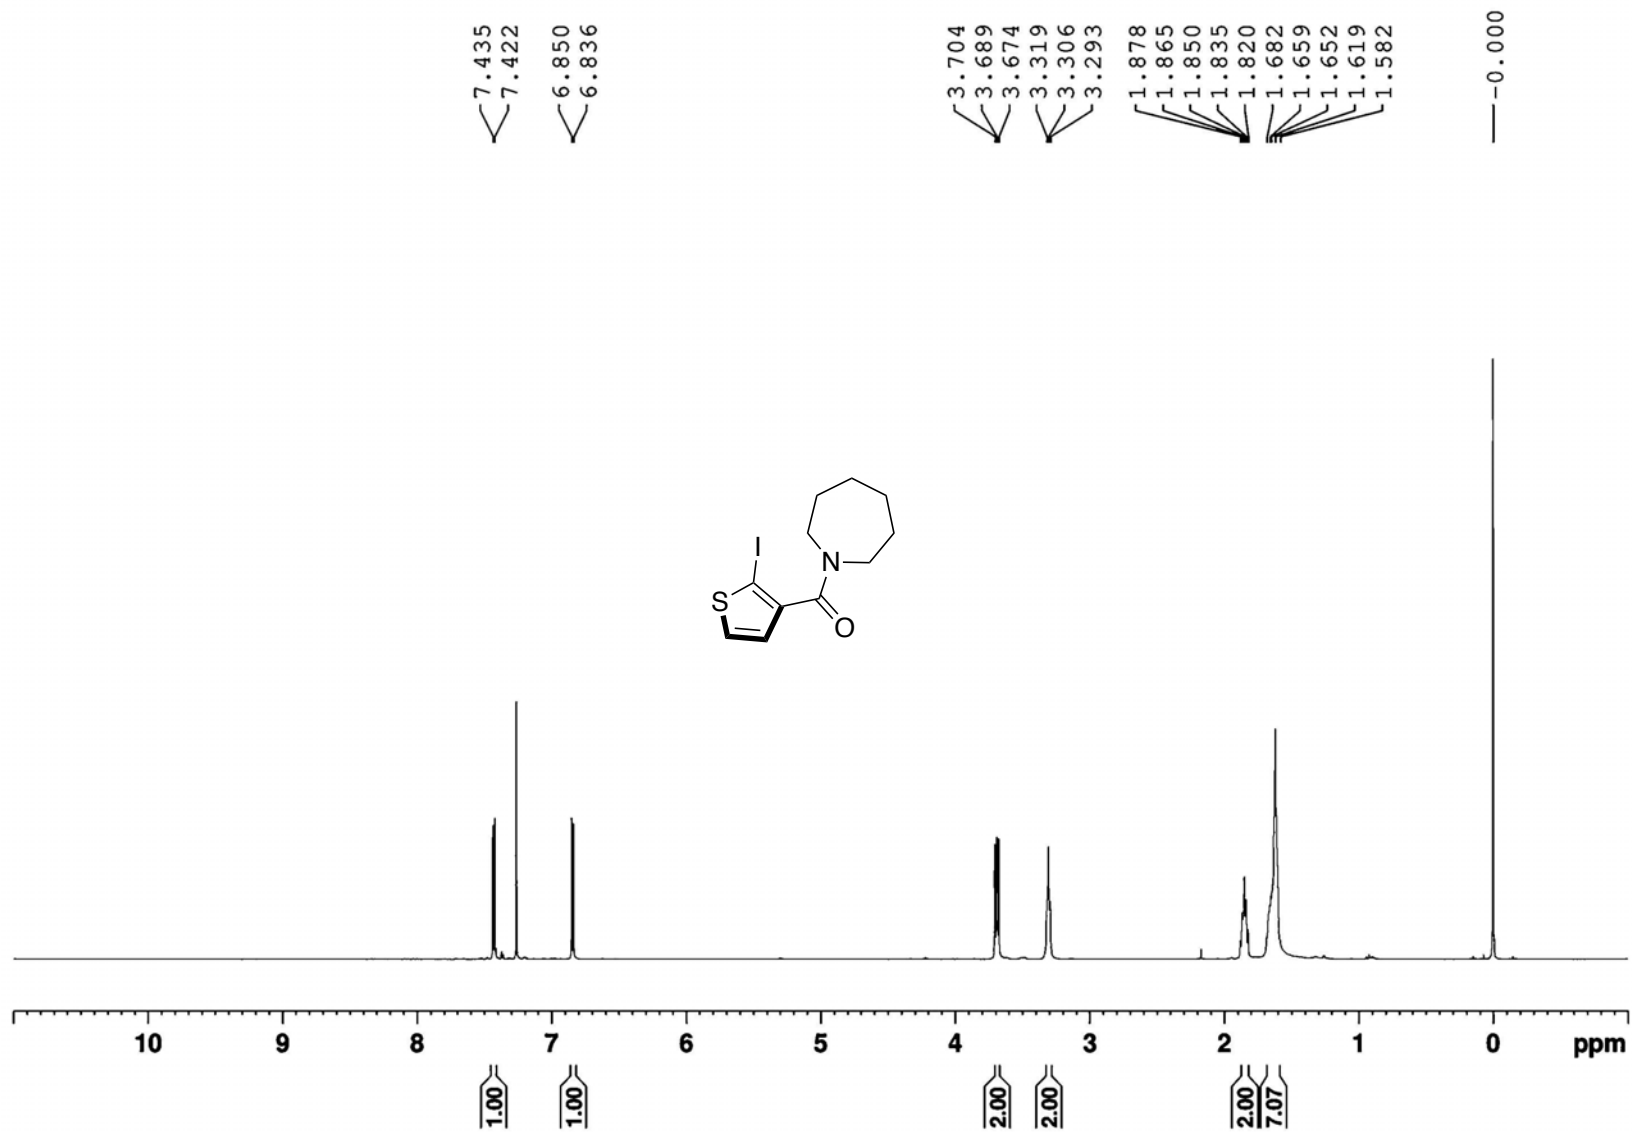

Supplementary Fig. 81 | <sup>1</sup>H NMR spectrum of 7c

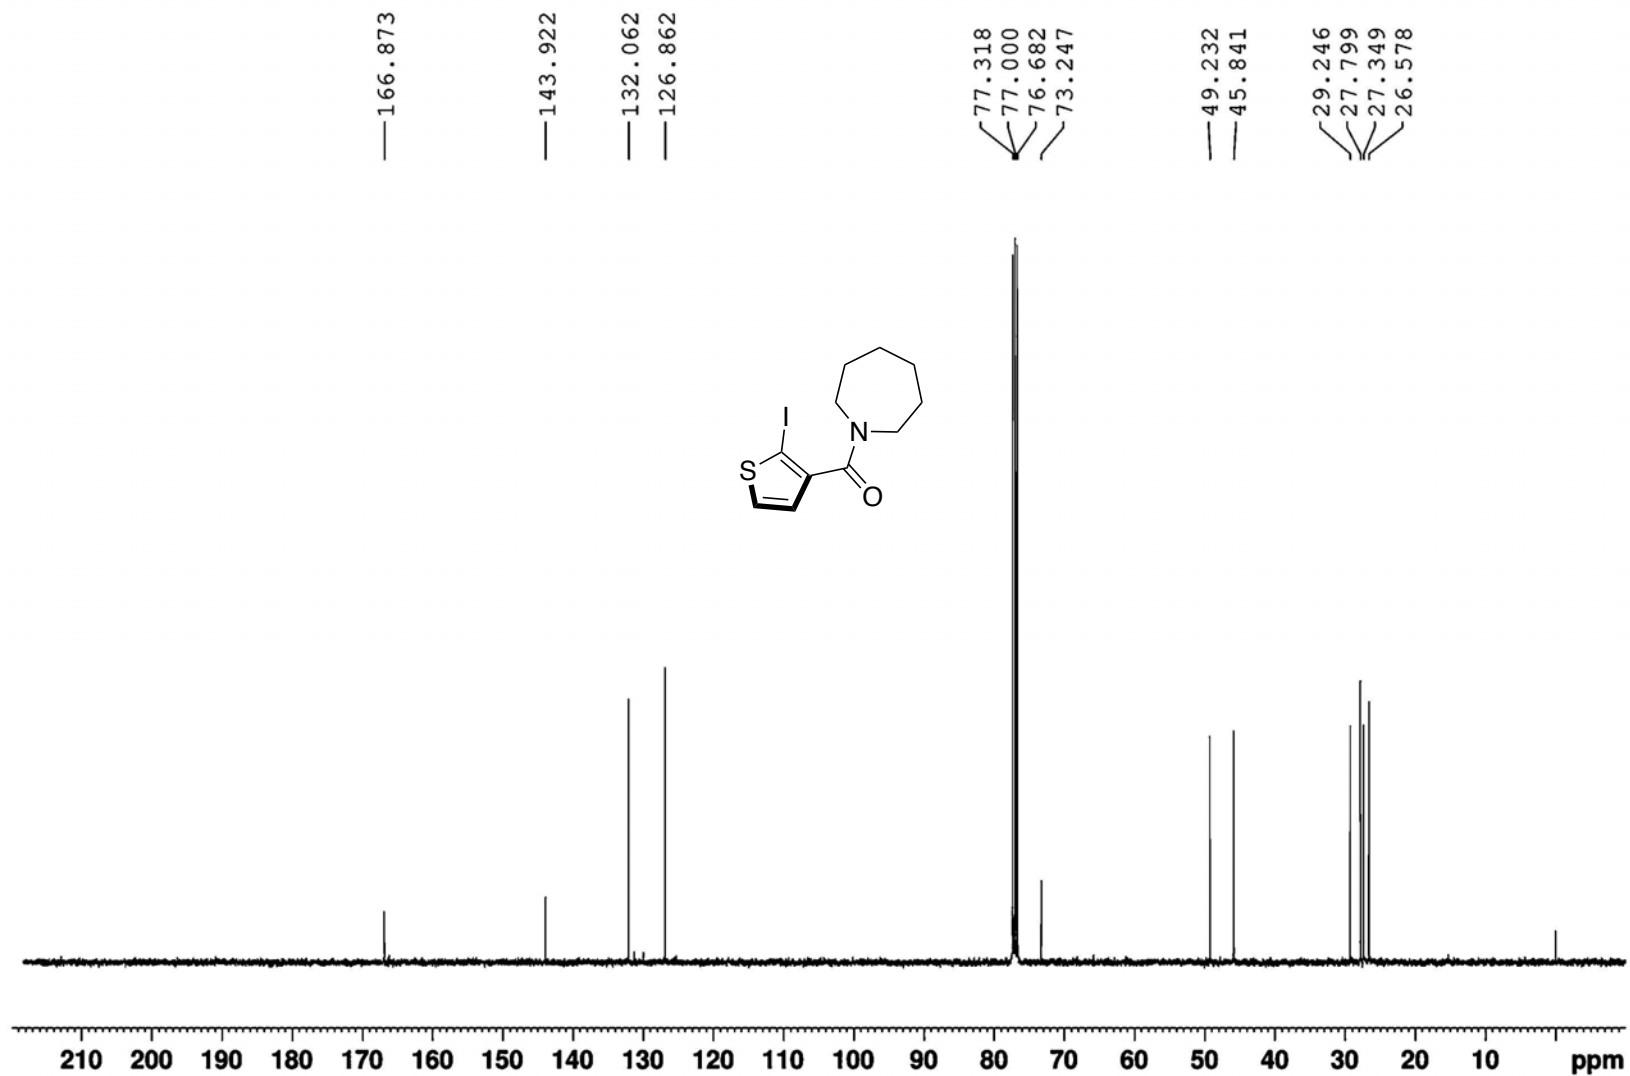

Supplementary Fig. 82 |  $^{13}\text{C}$  NMR spectrum of 7c

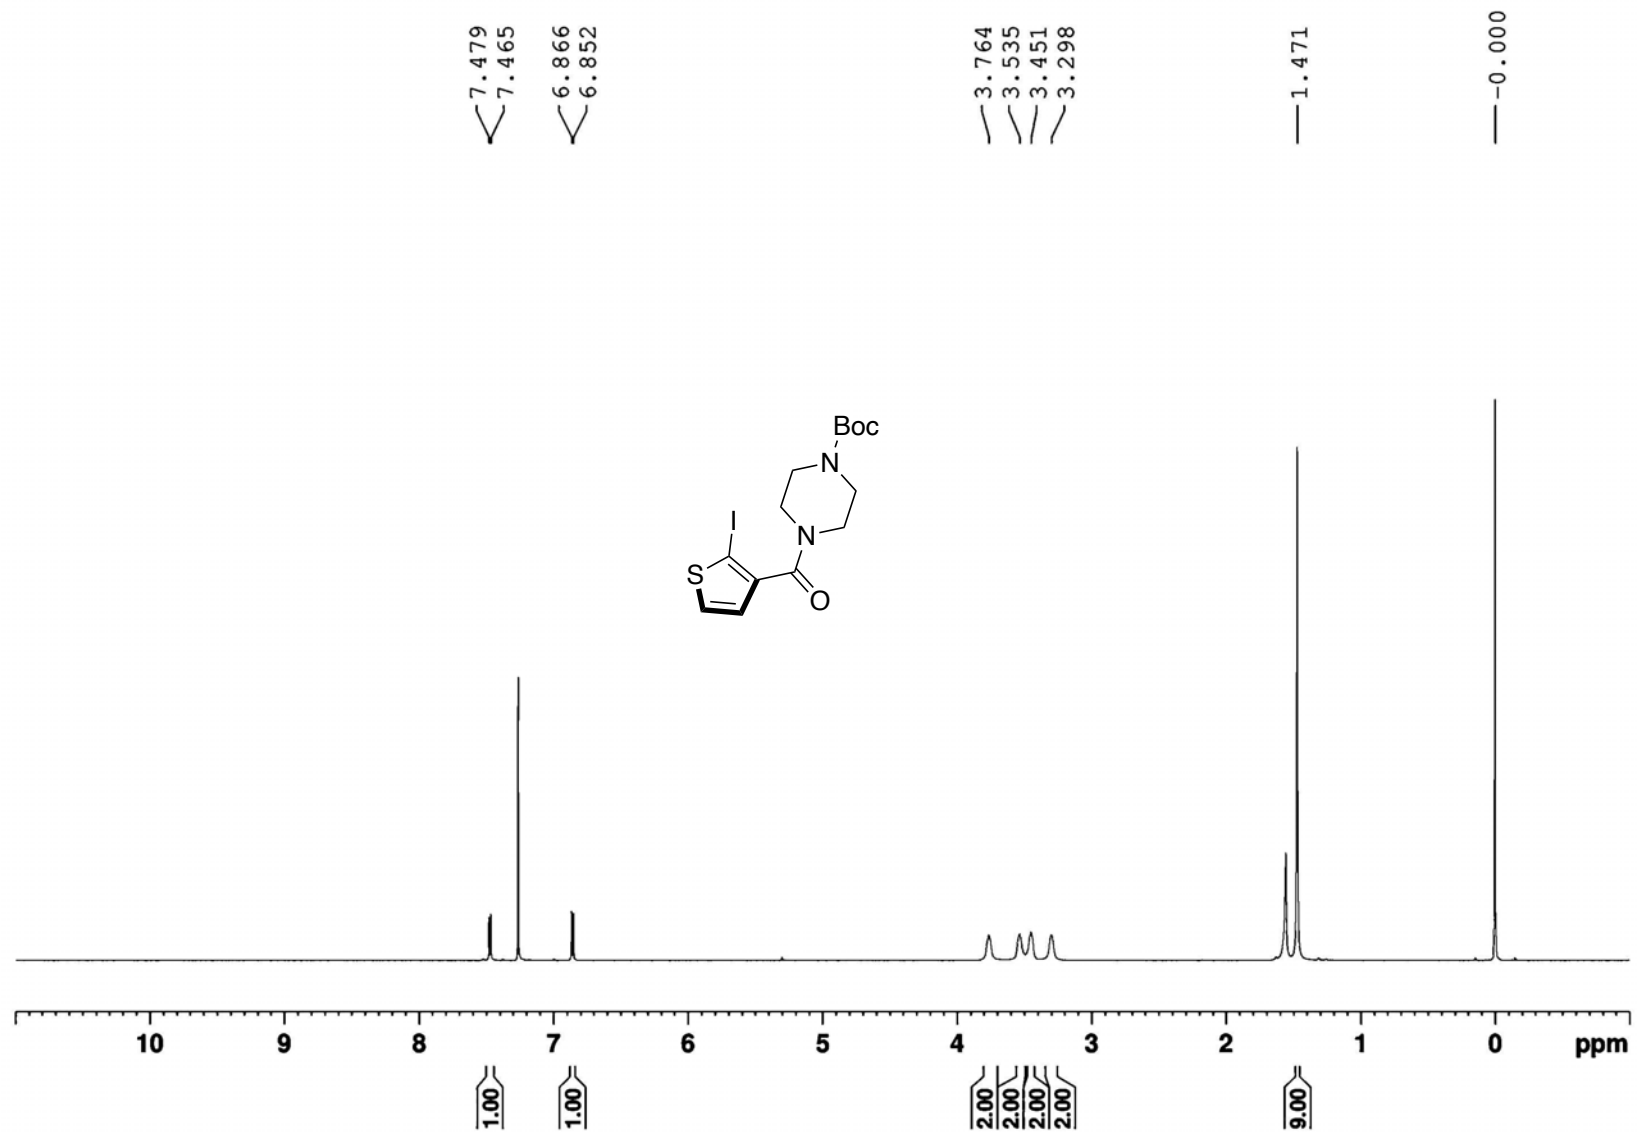

Supplementary Fig. 83 | <sup>1</sup>H NMR spectrum of 7d

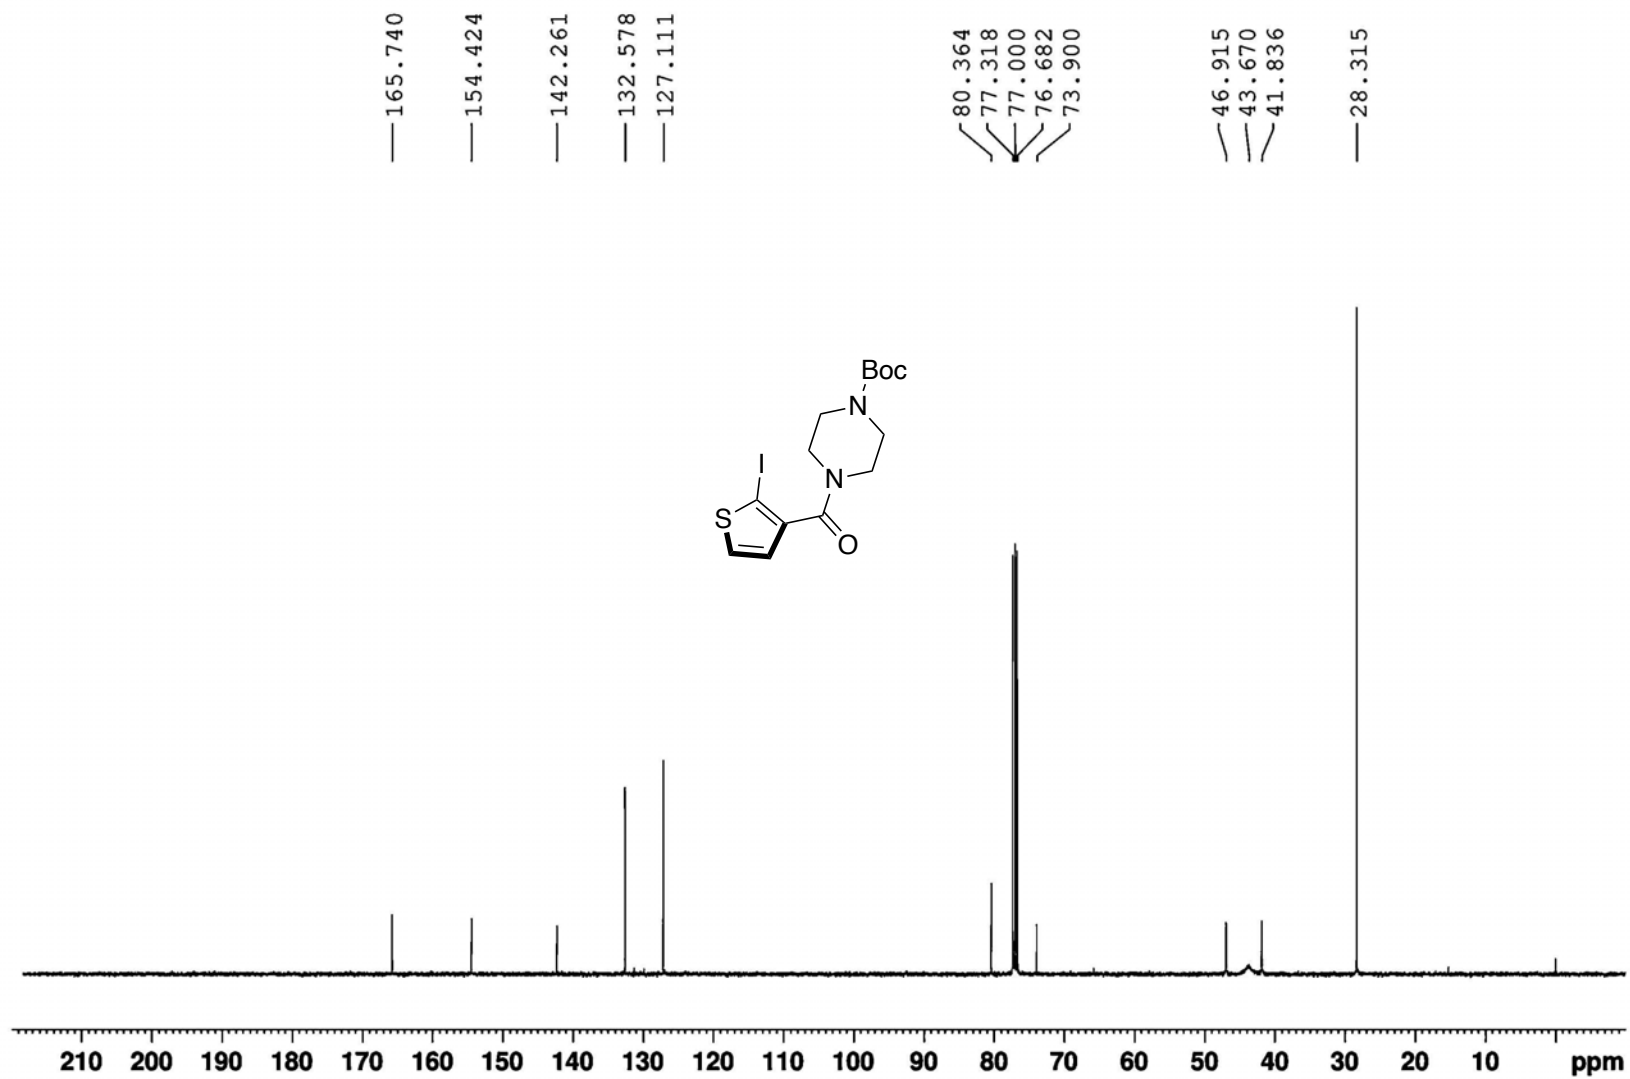

Supplementary Fig. 84 | <sup>13</sup>C NMR spectrum of 7d

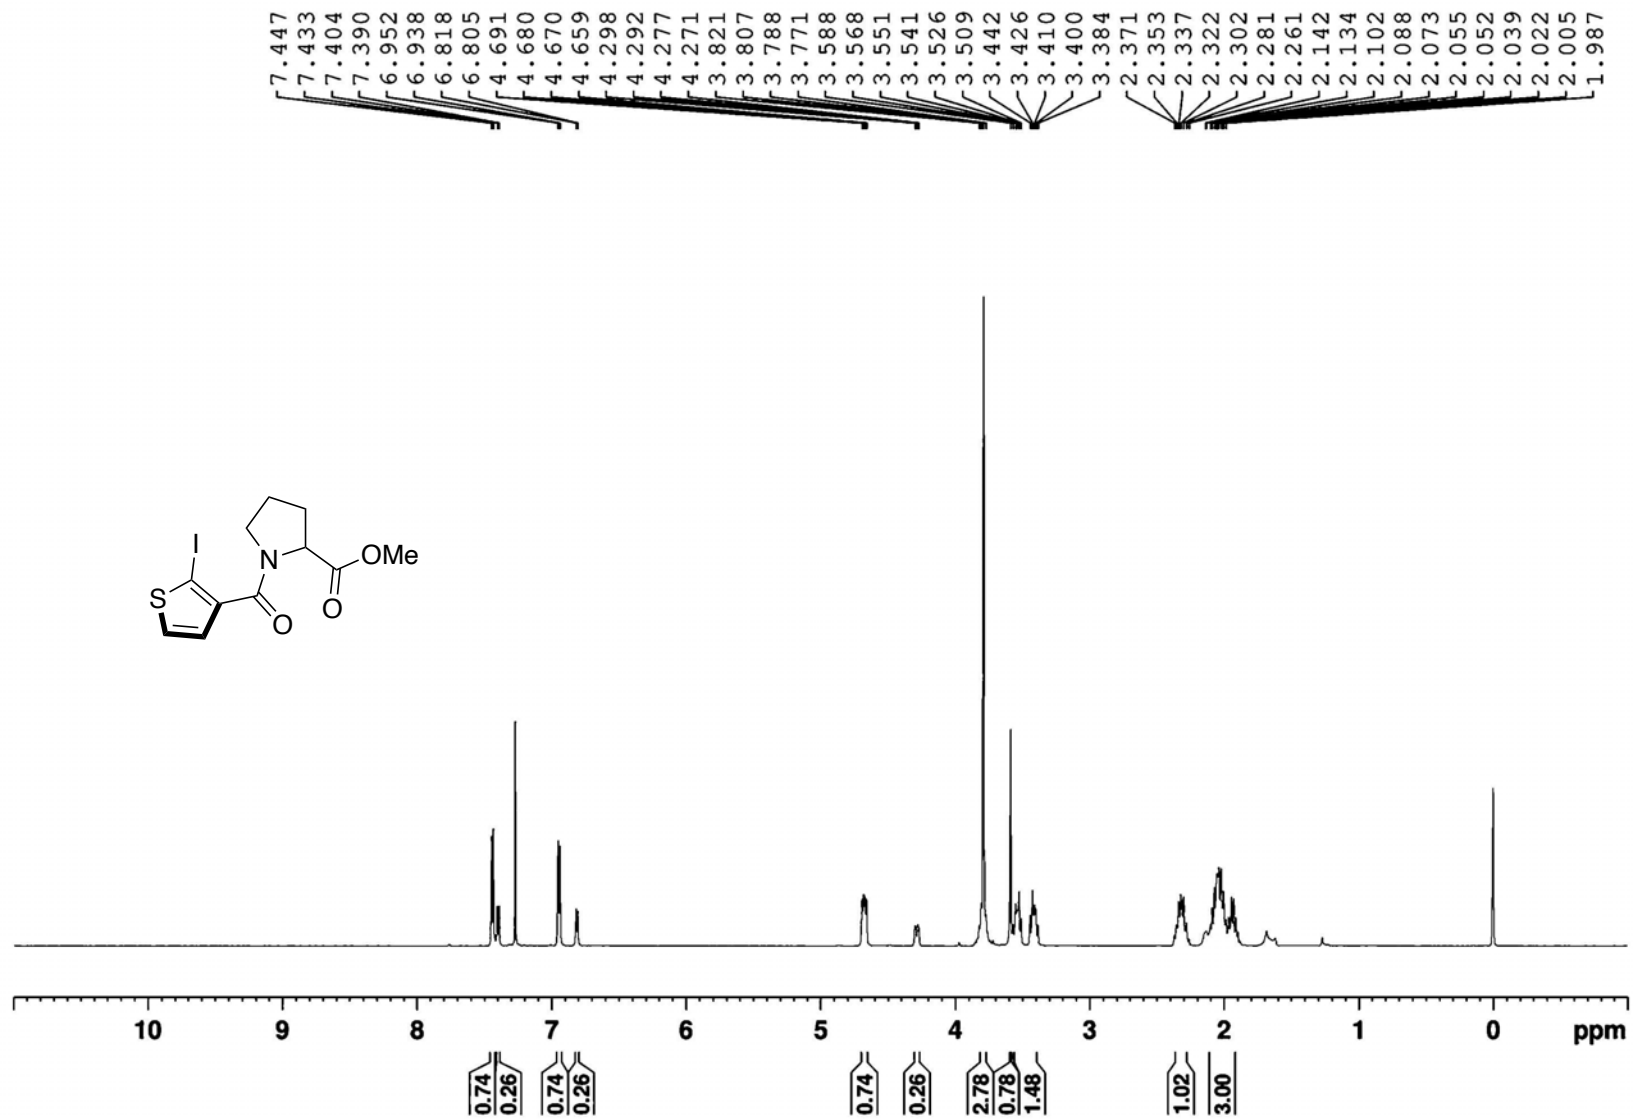

Supplementary Fig. 85 | <sup>1</sup>H NMR spectrum of 7e

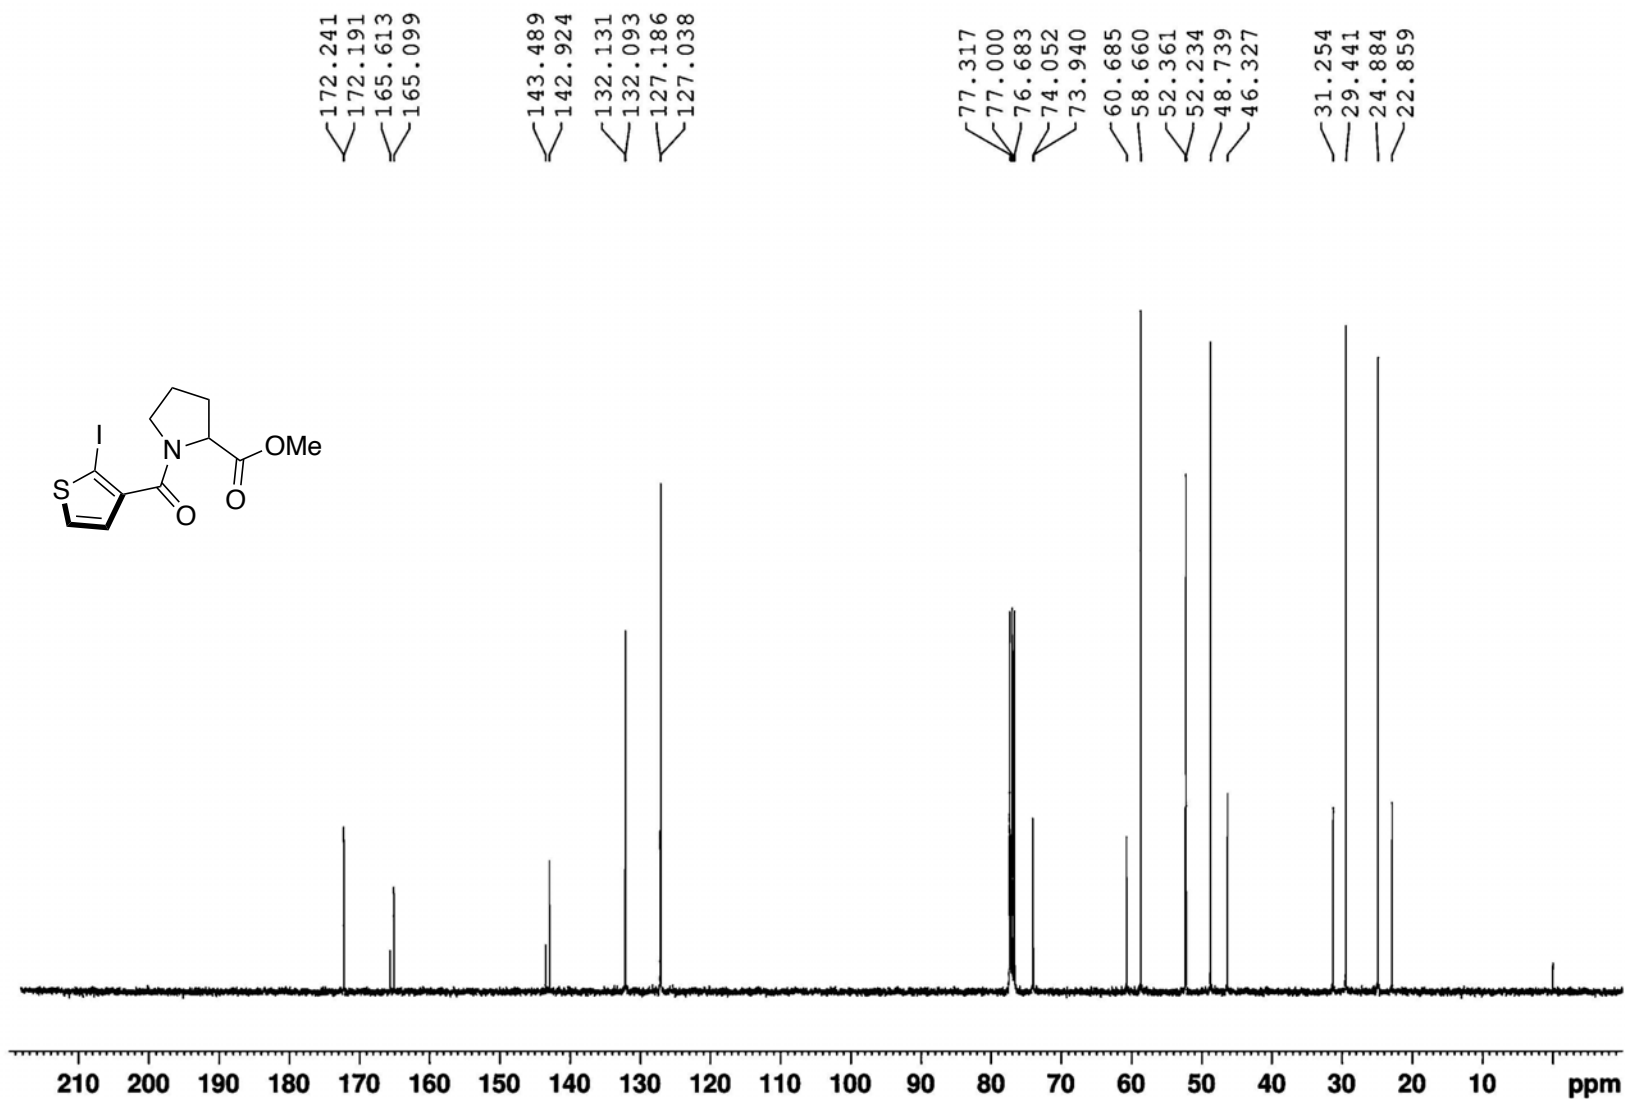

Supplementary Fig. 86 | <sup>13</sup>C NMR spectrum of 7e

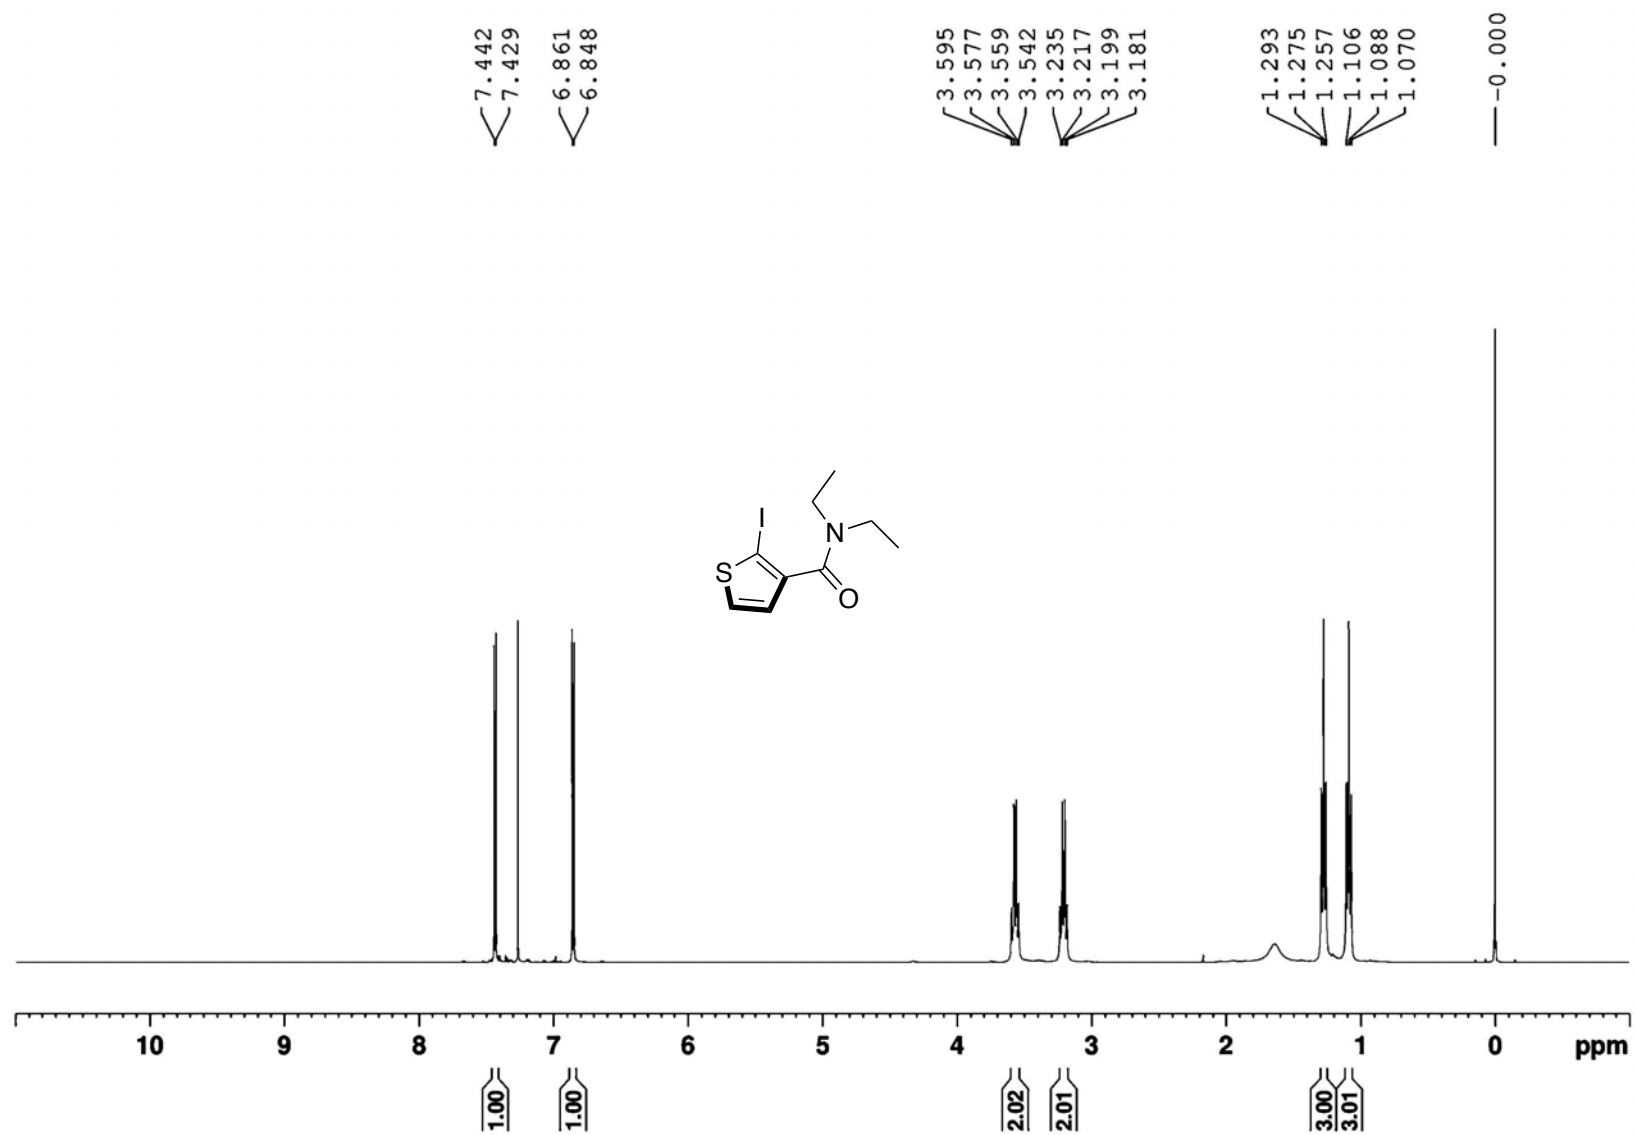

Supplementary Fig. 87 | <sup>1</sup>H NMR spectrum of 7f



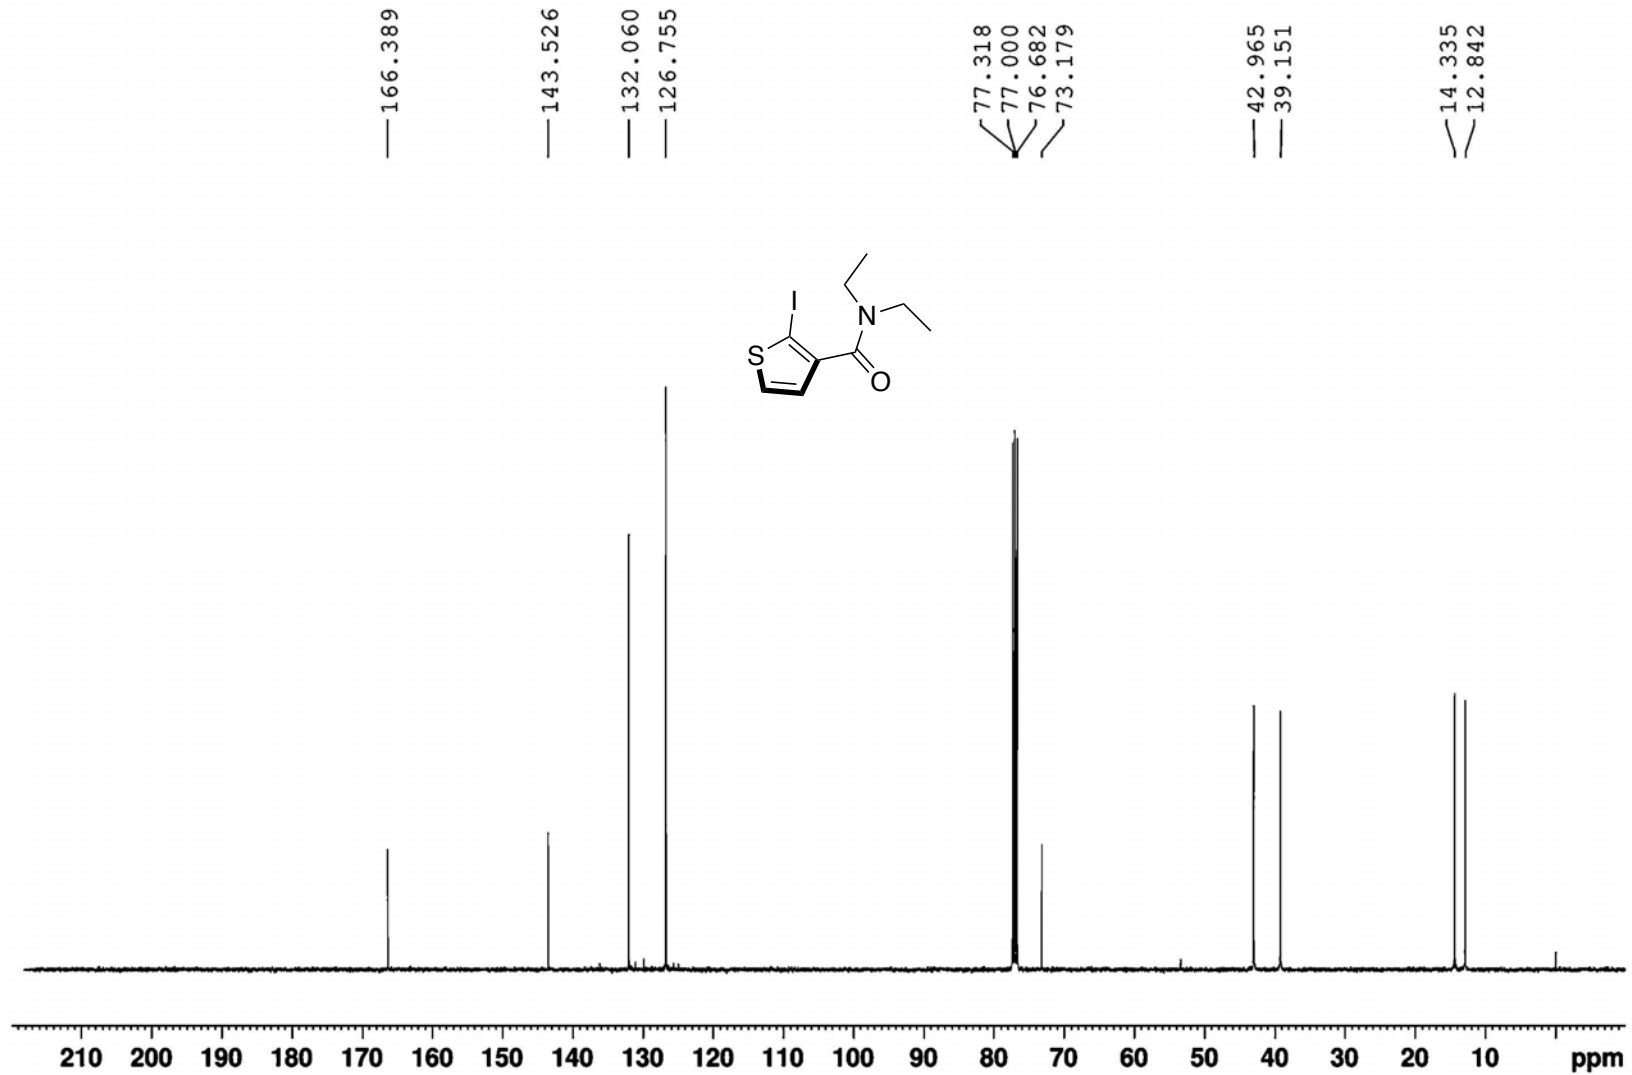

Supplementary Fig. 88 |  $^{13}\text{C}$  NMR spectrum of 7f

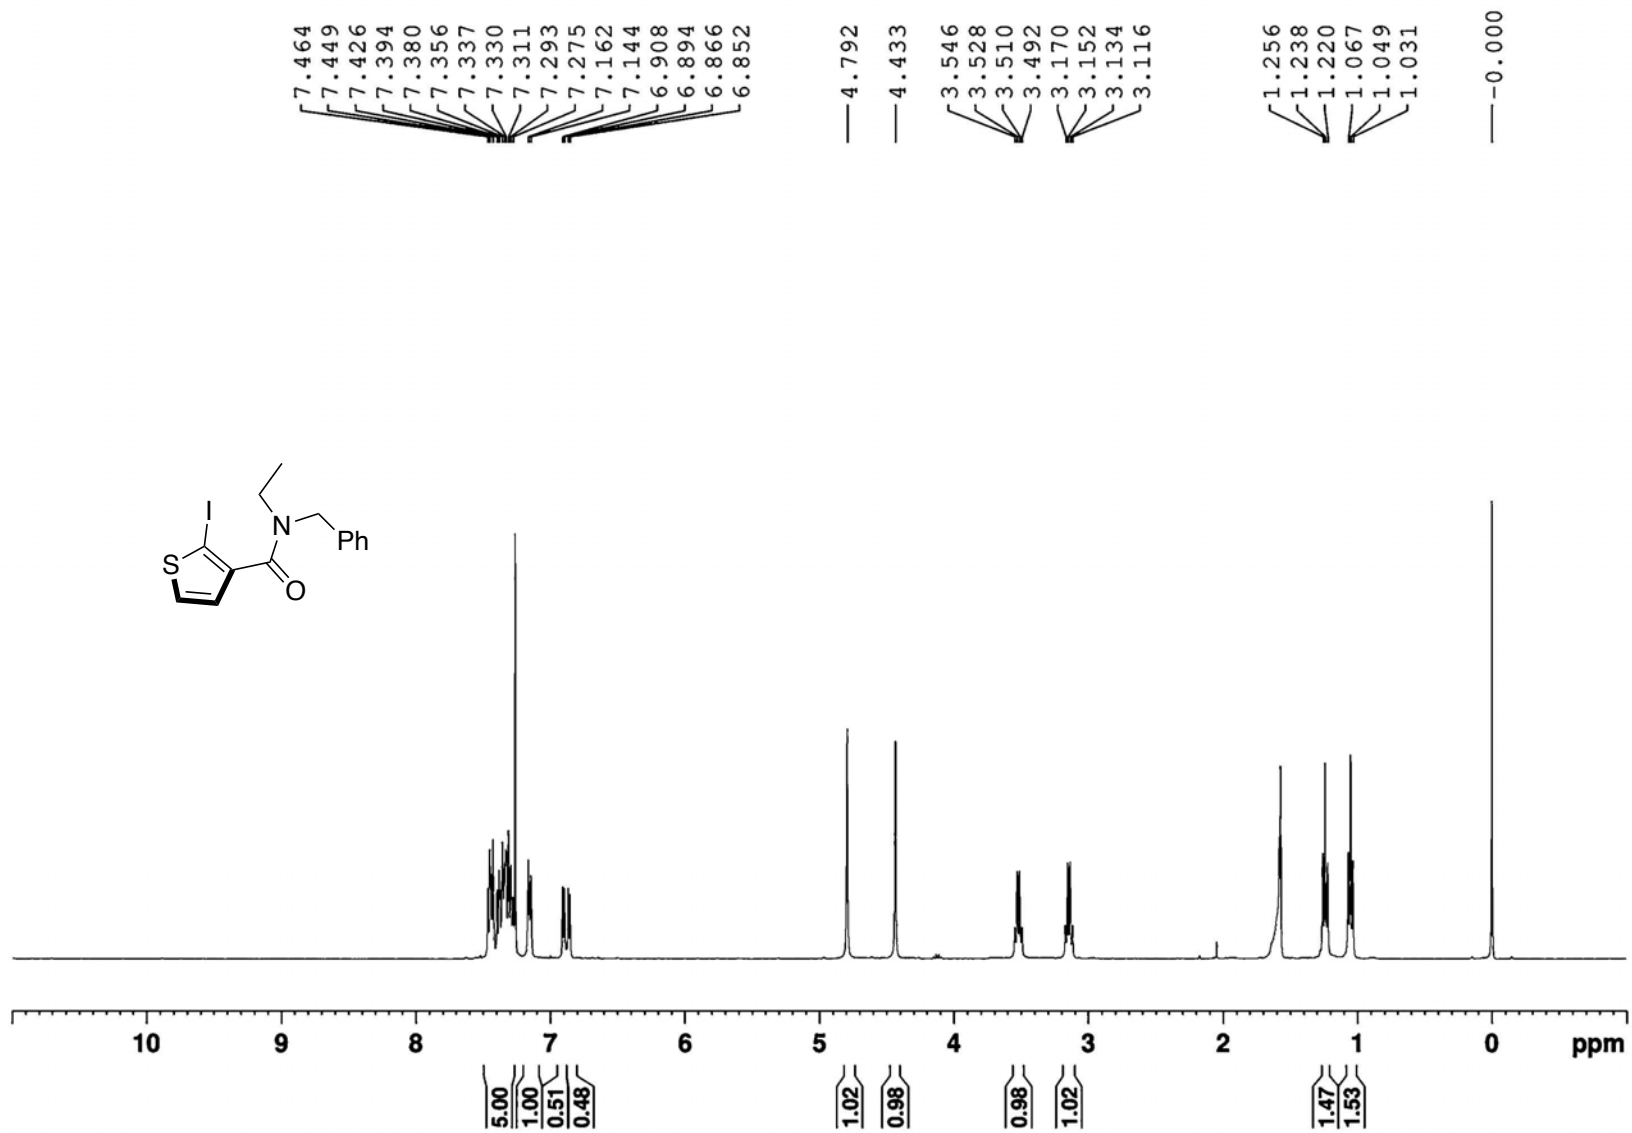

Supplementary Fig. 89 | <sup>1</sup>H NMR spectrum of 7g

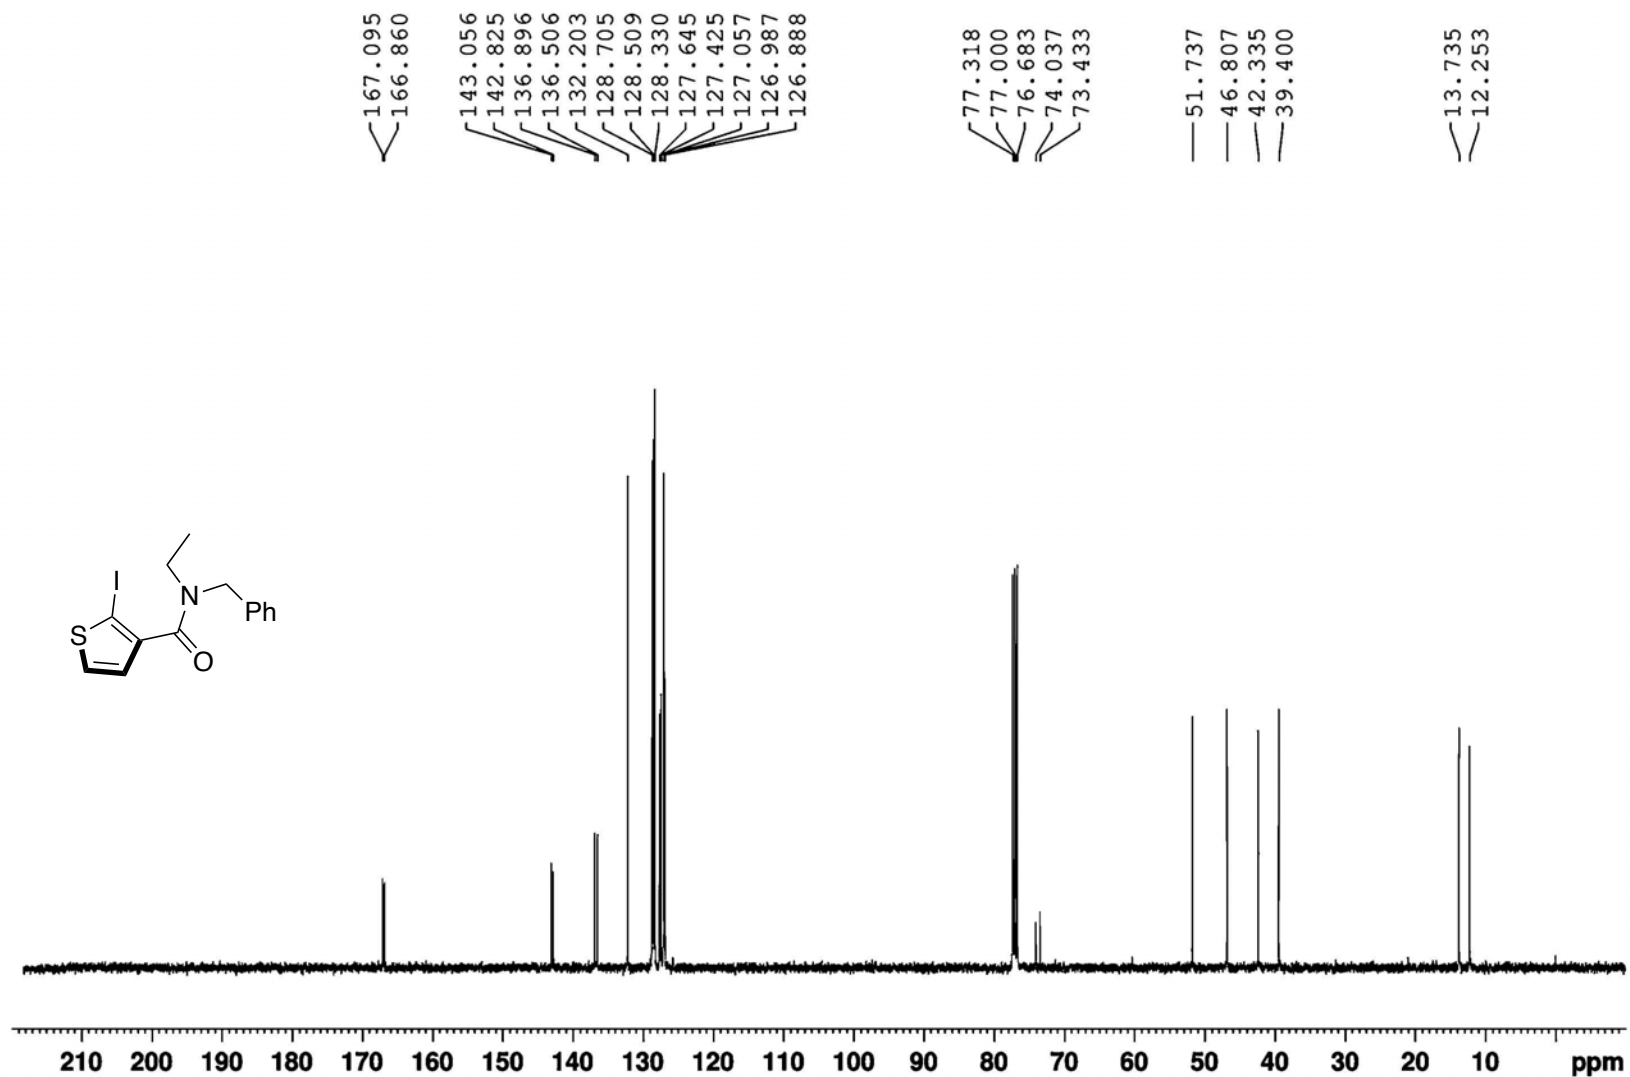

Supplementary Fig. 90 | <sup>13</sup>C NMR spectrum of 7g

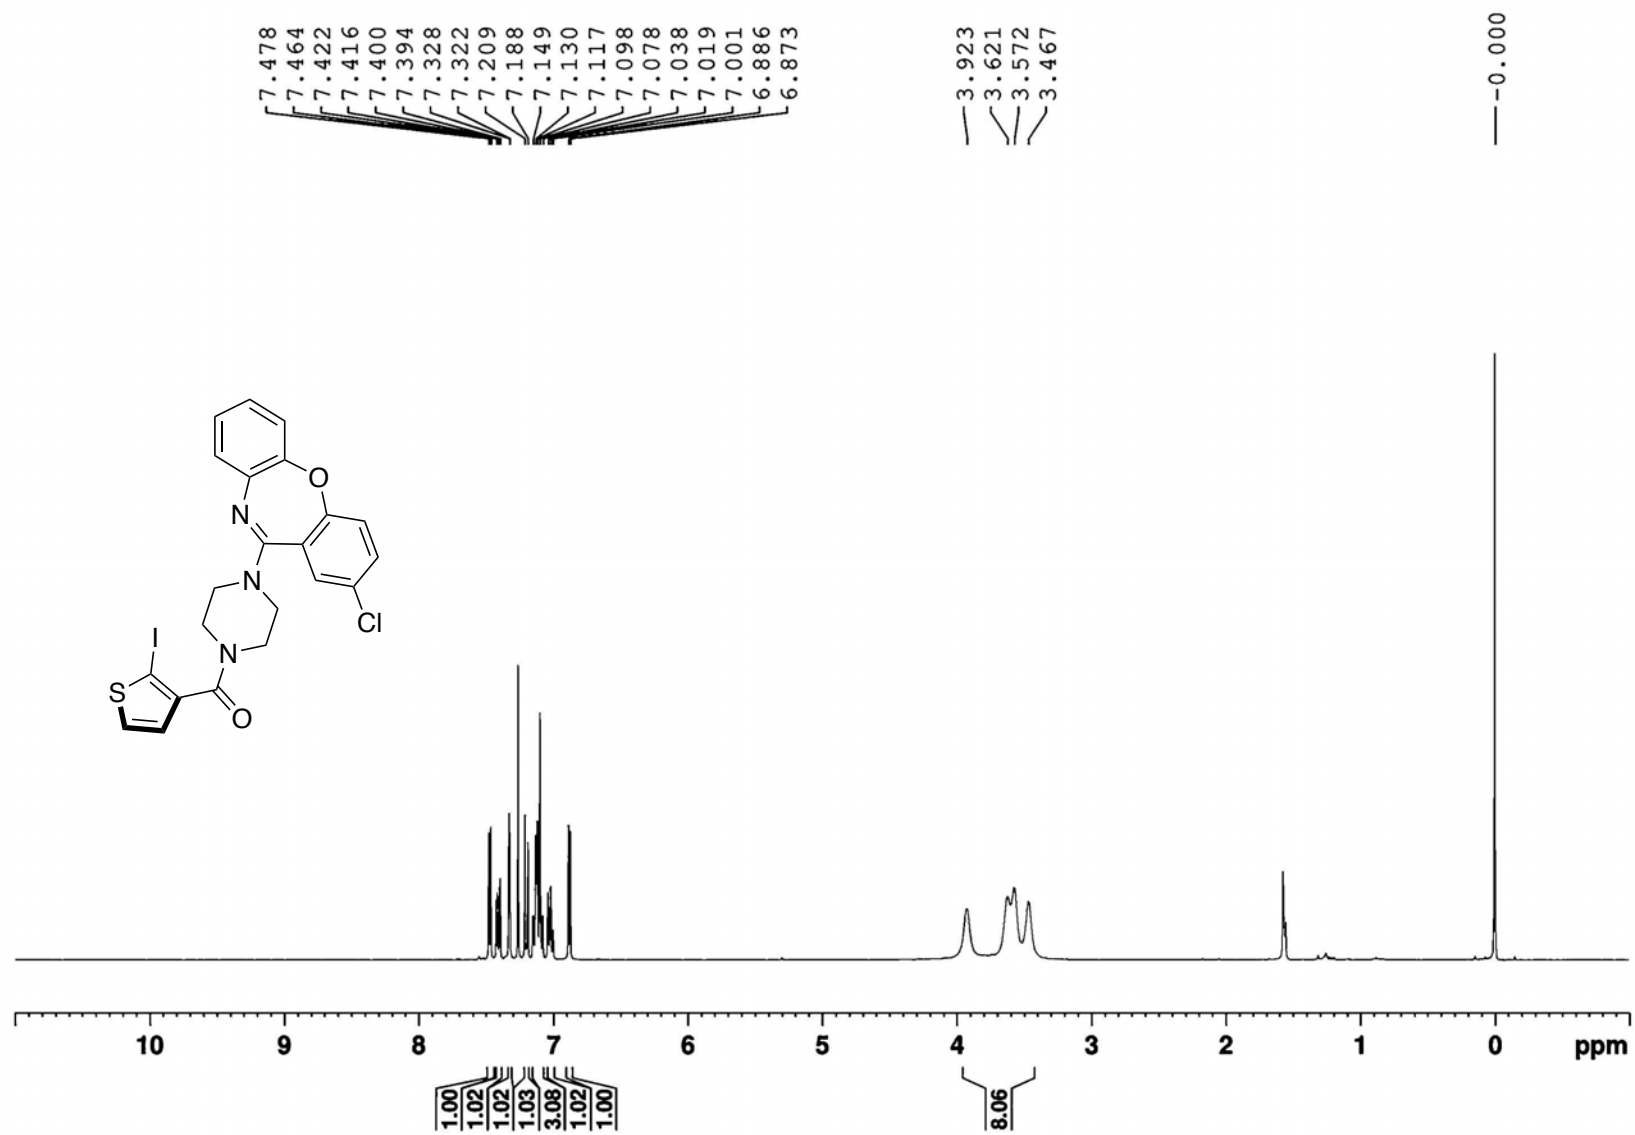

Supplementary Fig. 91 | <sup>1</sup>H NMR spectrum of 7h

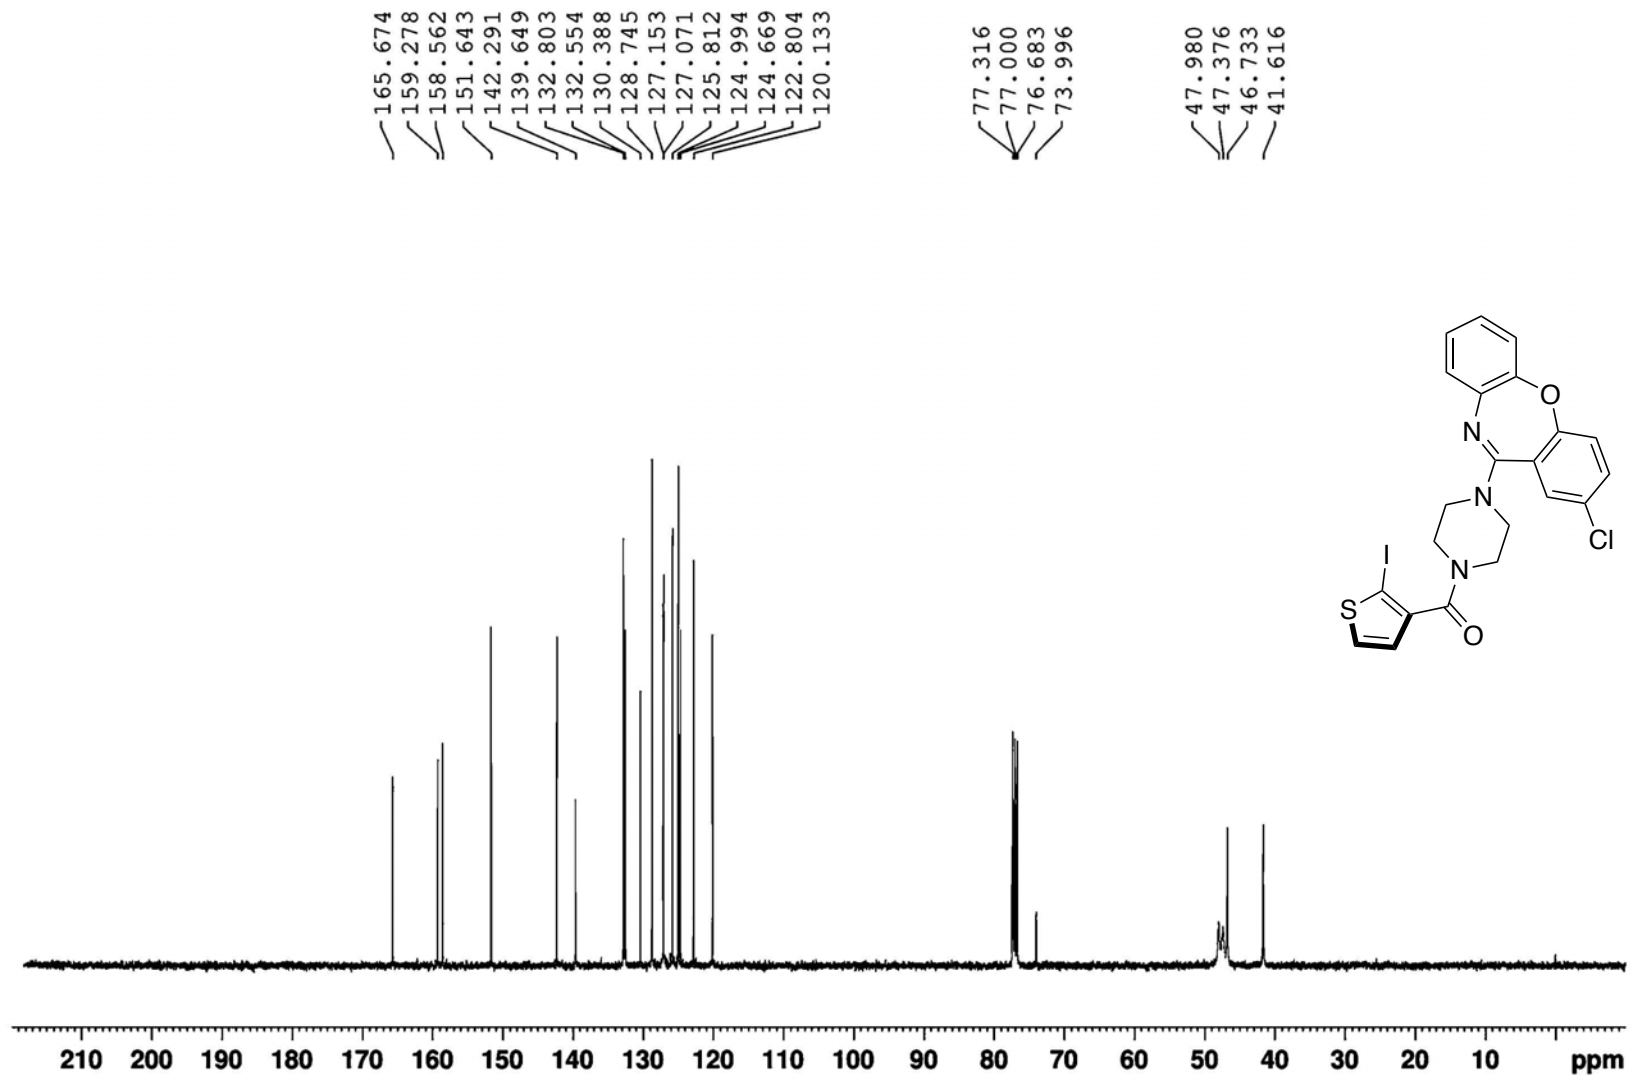

Supplementary Fig. 92 |  $^{13}\text{C}$  NMR spectrum of **7h**

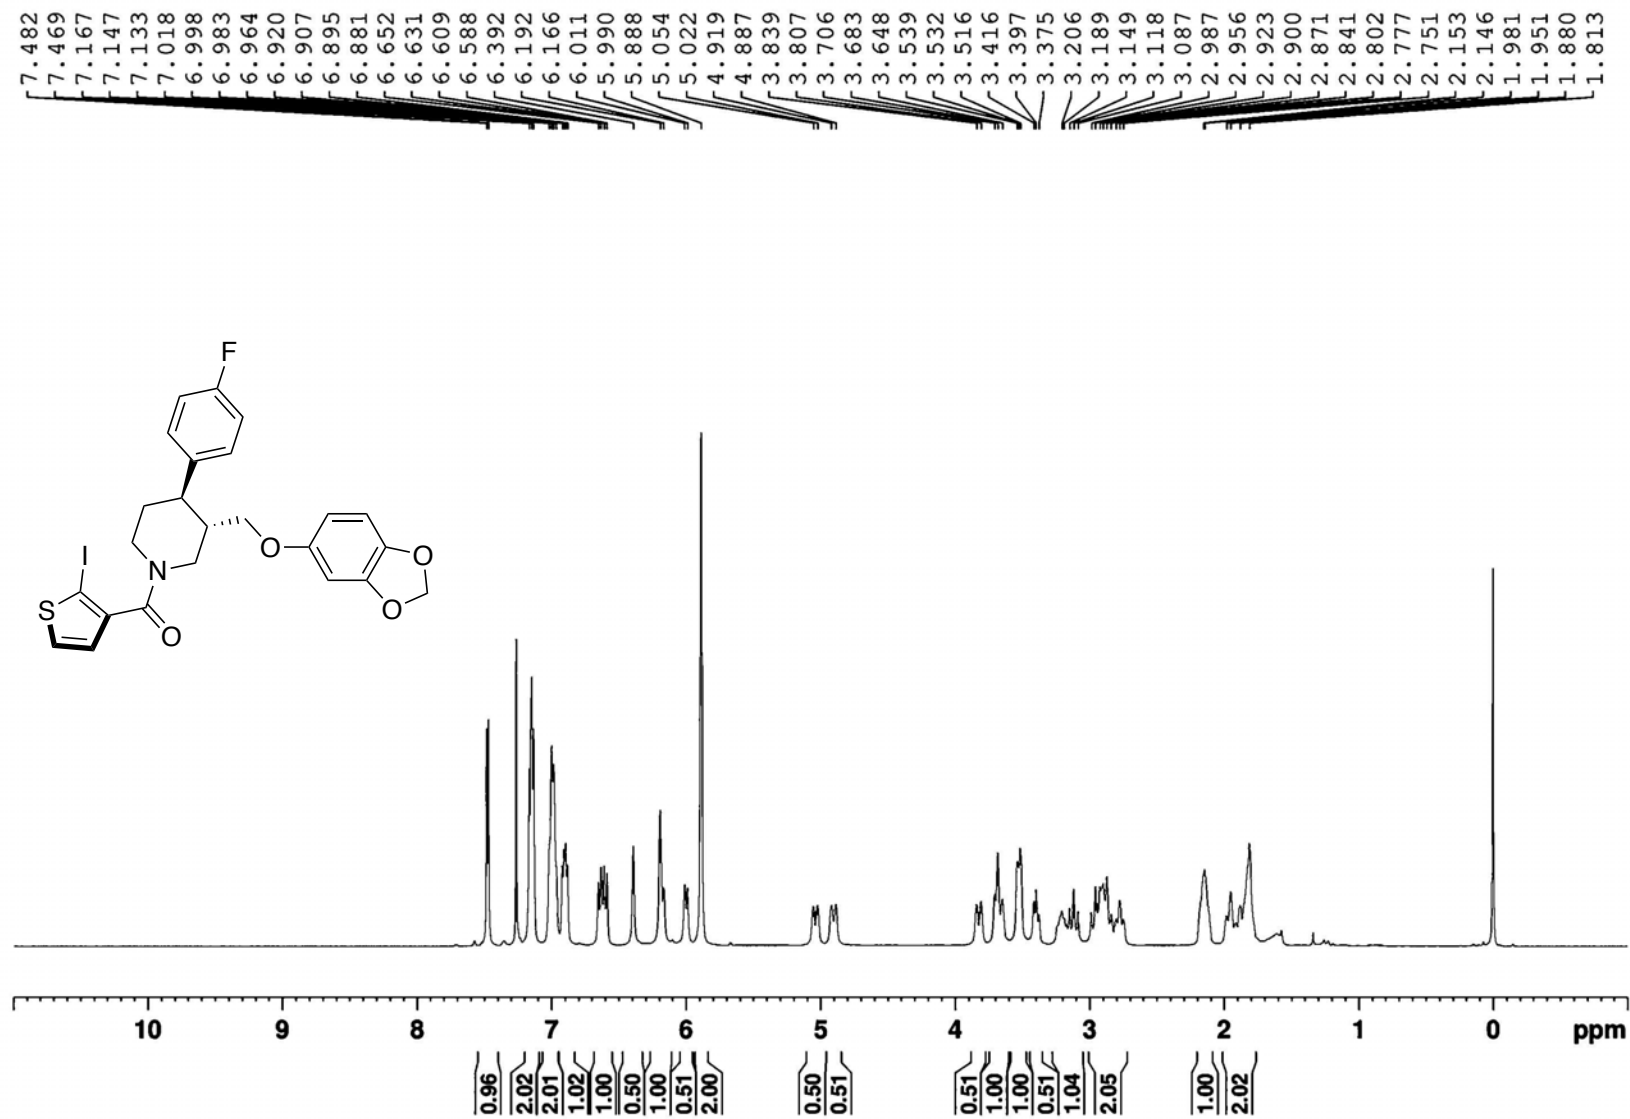

Supplementary Fig. 93 | <sup>1</sup>H NMR spectrum of 7i

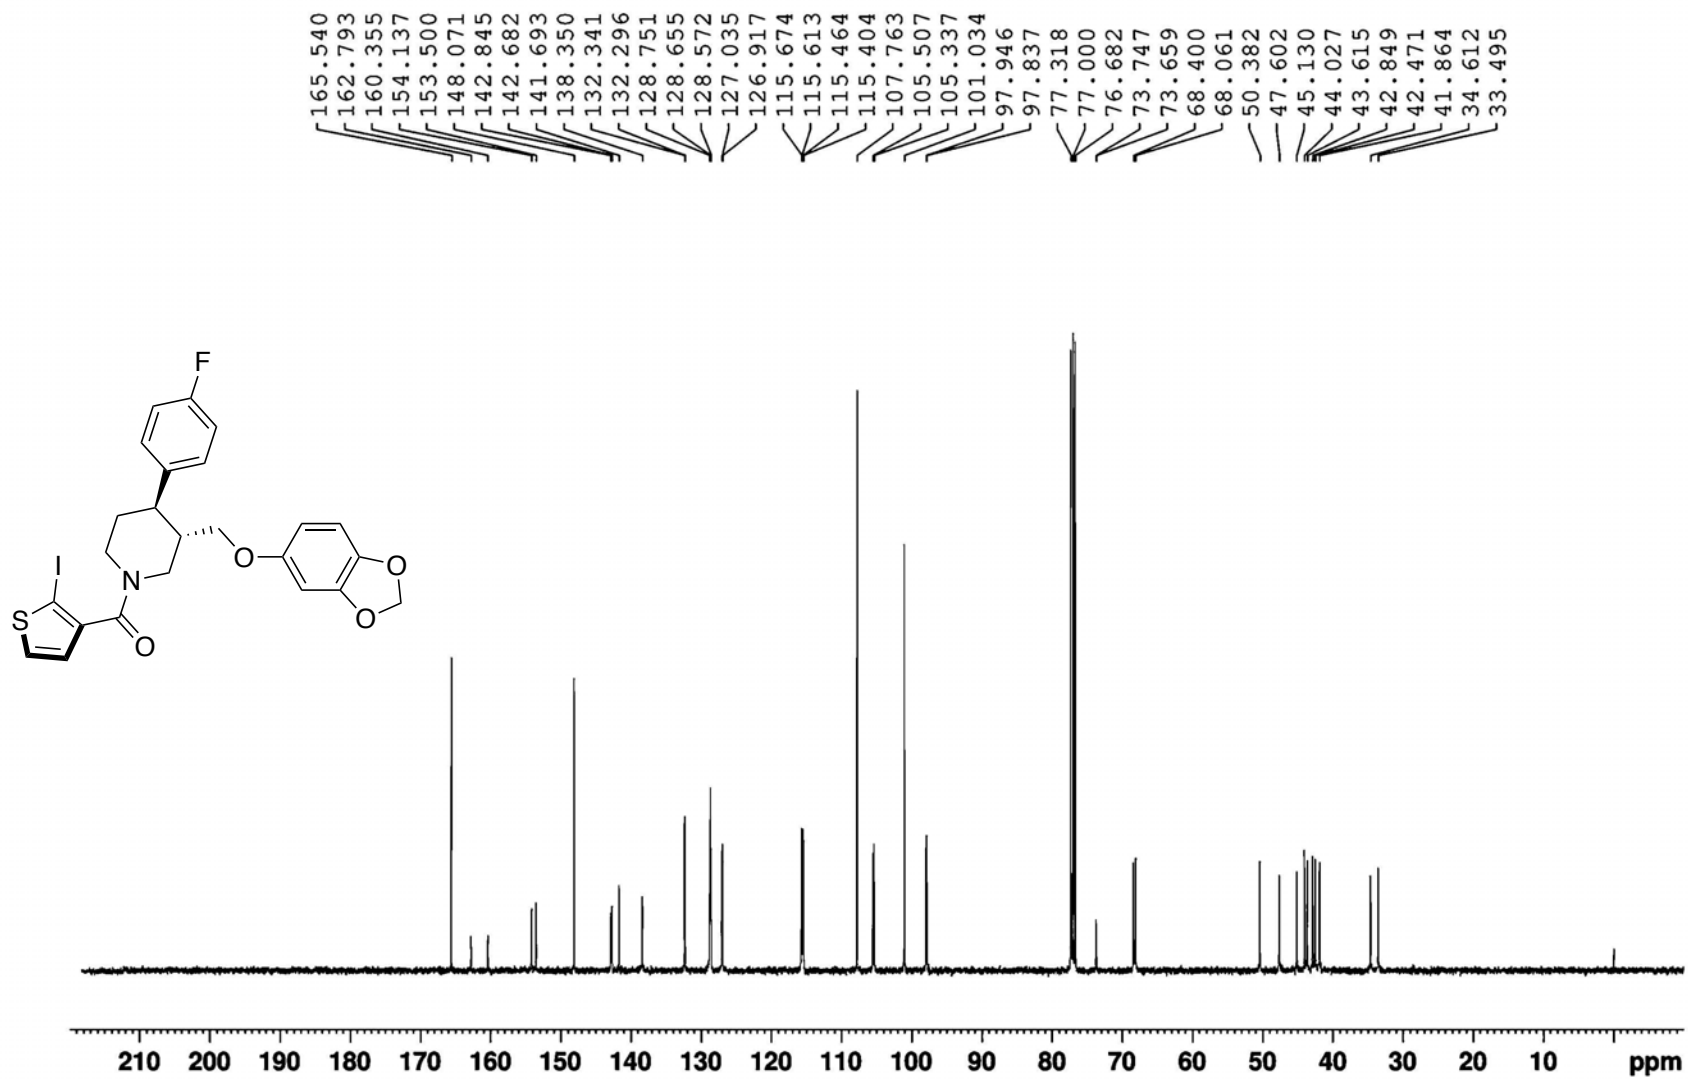

Supplementary Fig. 94 | <sup>13</sup>C NMR spectrum of 7i

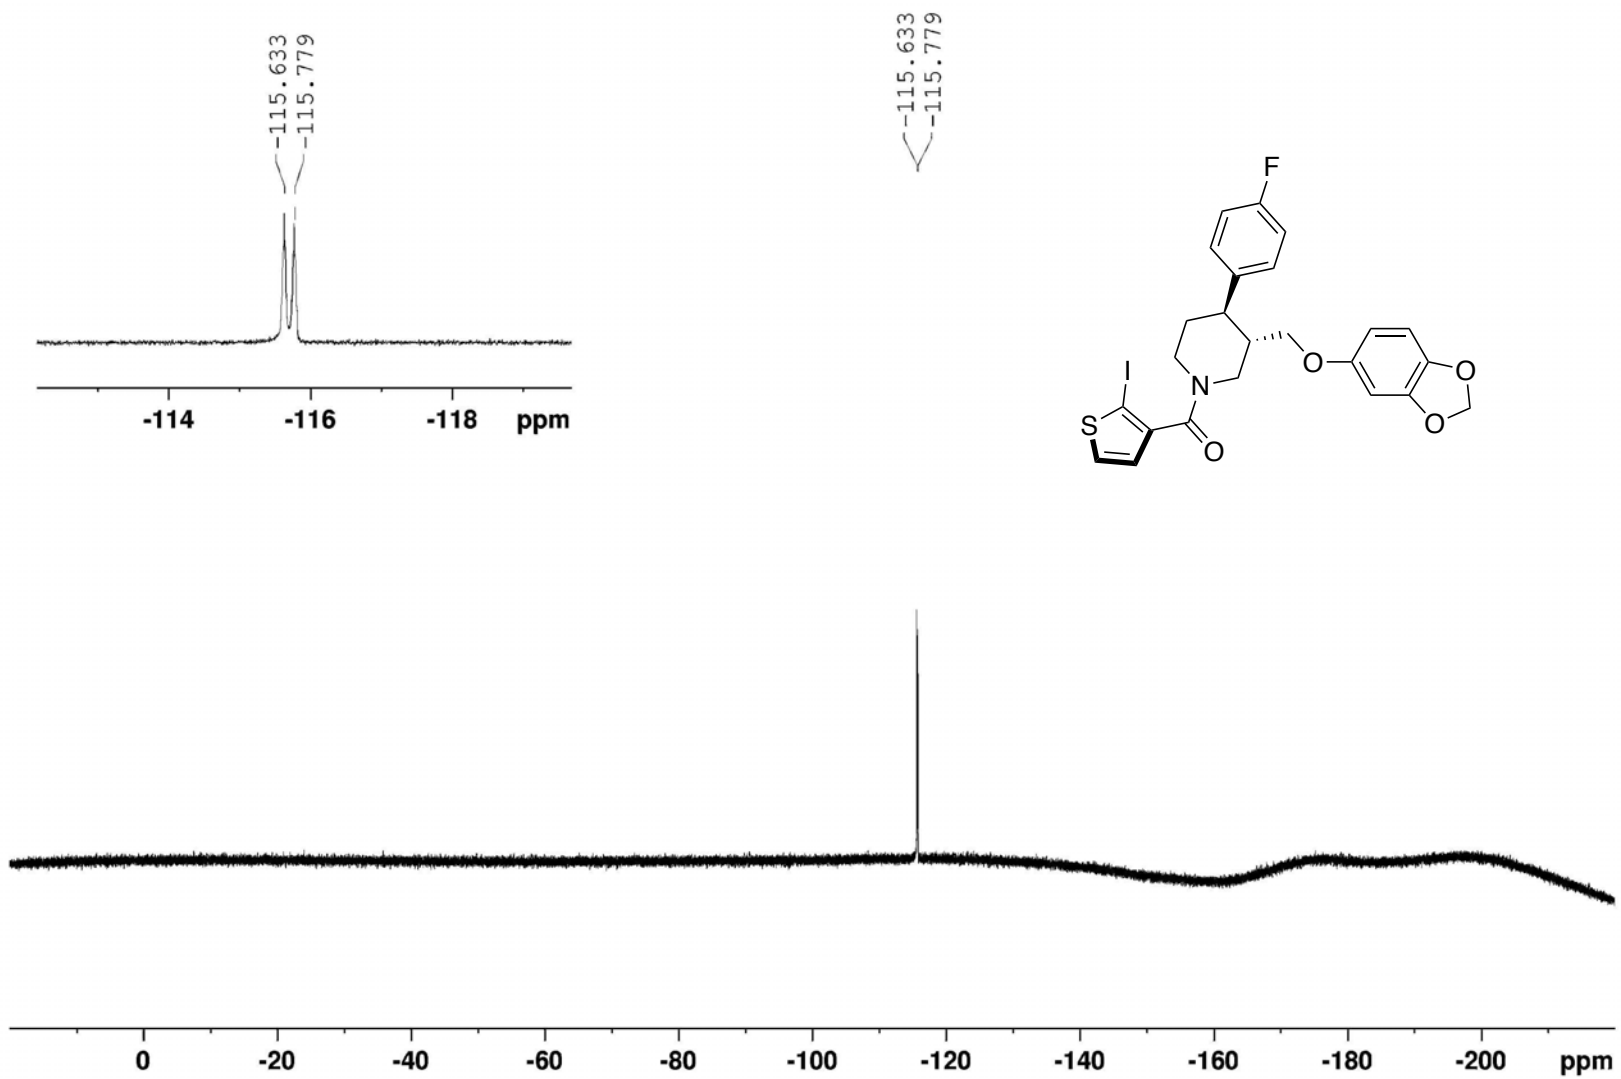

Supplementary Fig. 95 |  $^{19}\text{F}$  NMR spectrum of **7i**



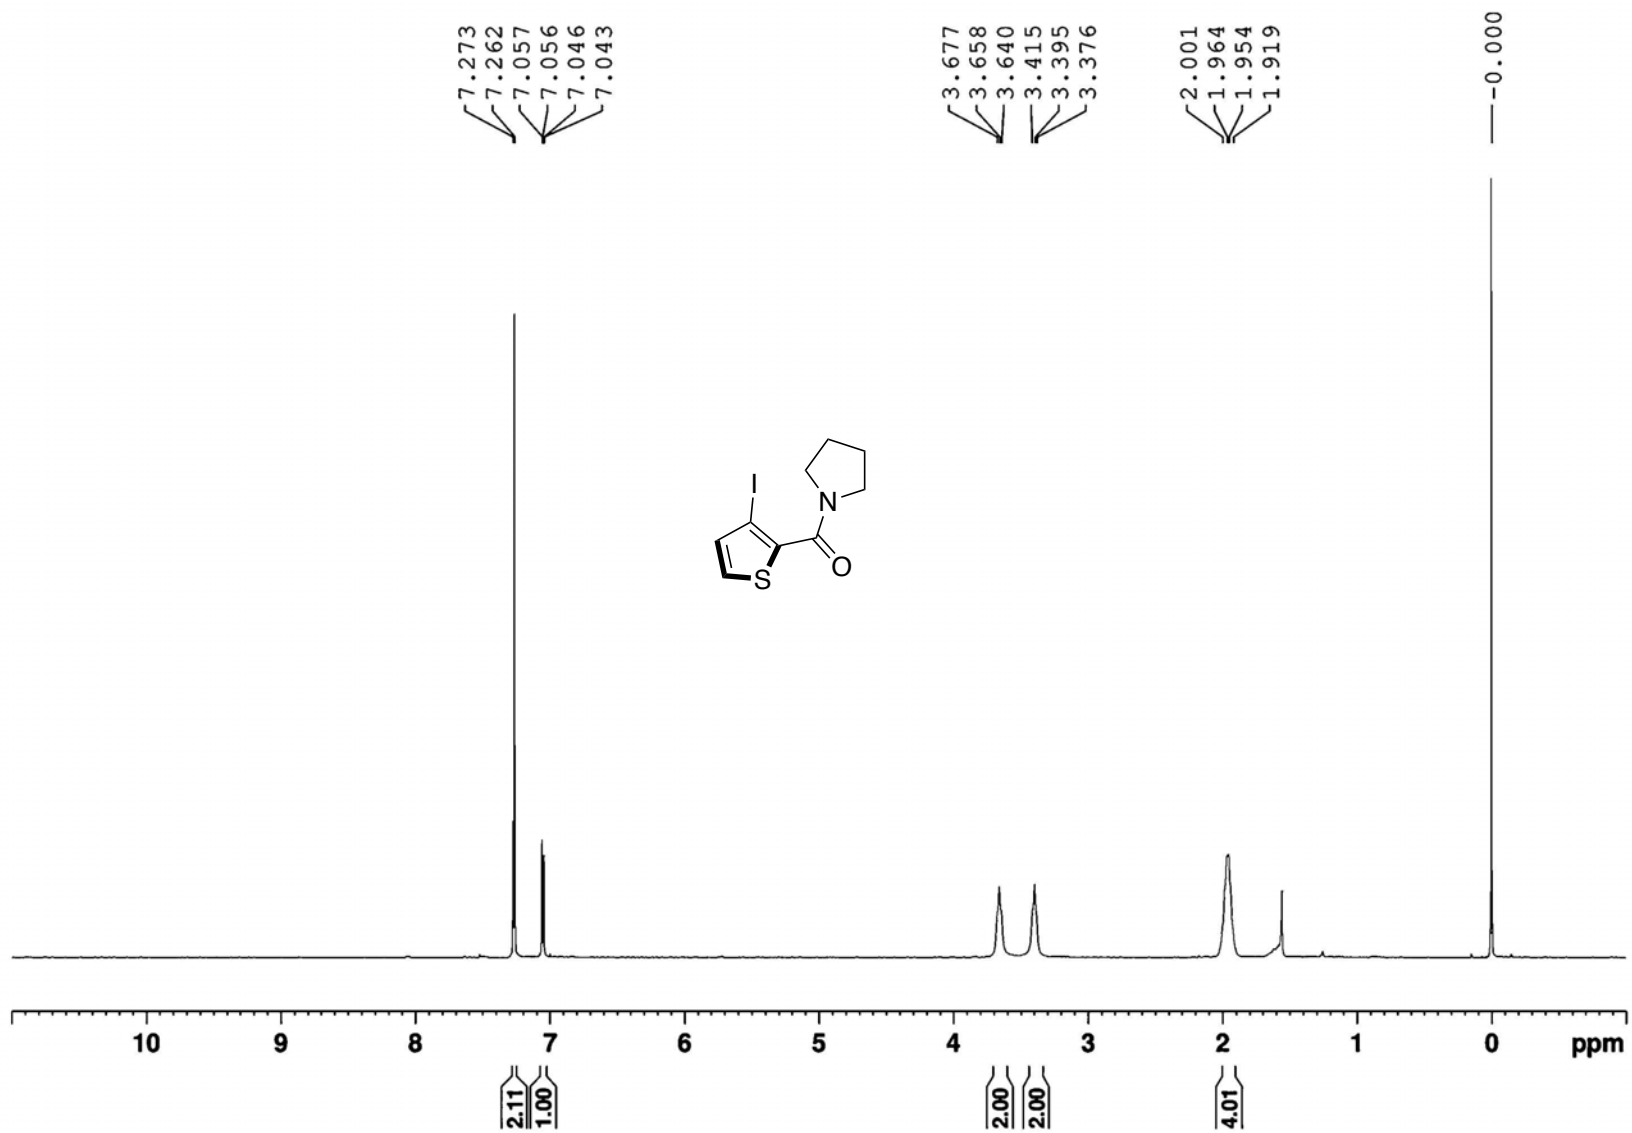

Supplementary Fig. 96 | <sup>1</sup>H NMR spectrum of 7a-A

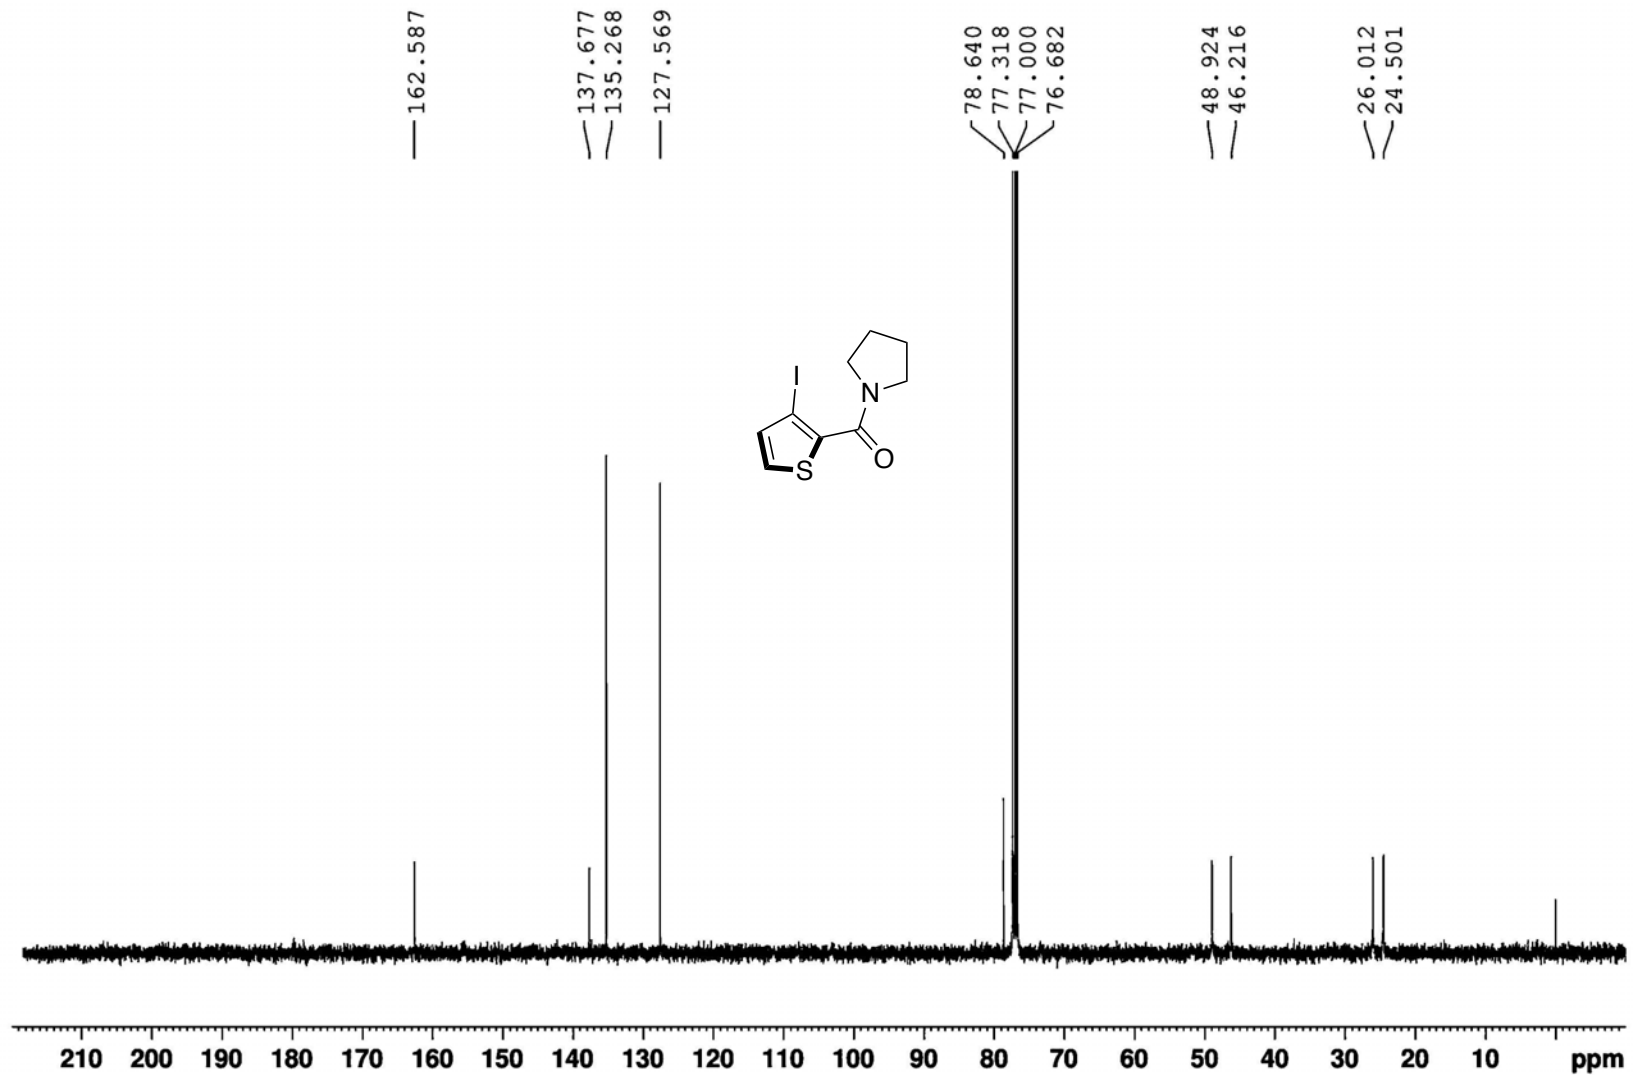

Supplementary Fig. 97 | <sup>13</sup>C NMR spectrum of 7a-A

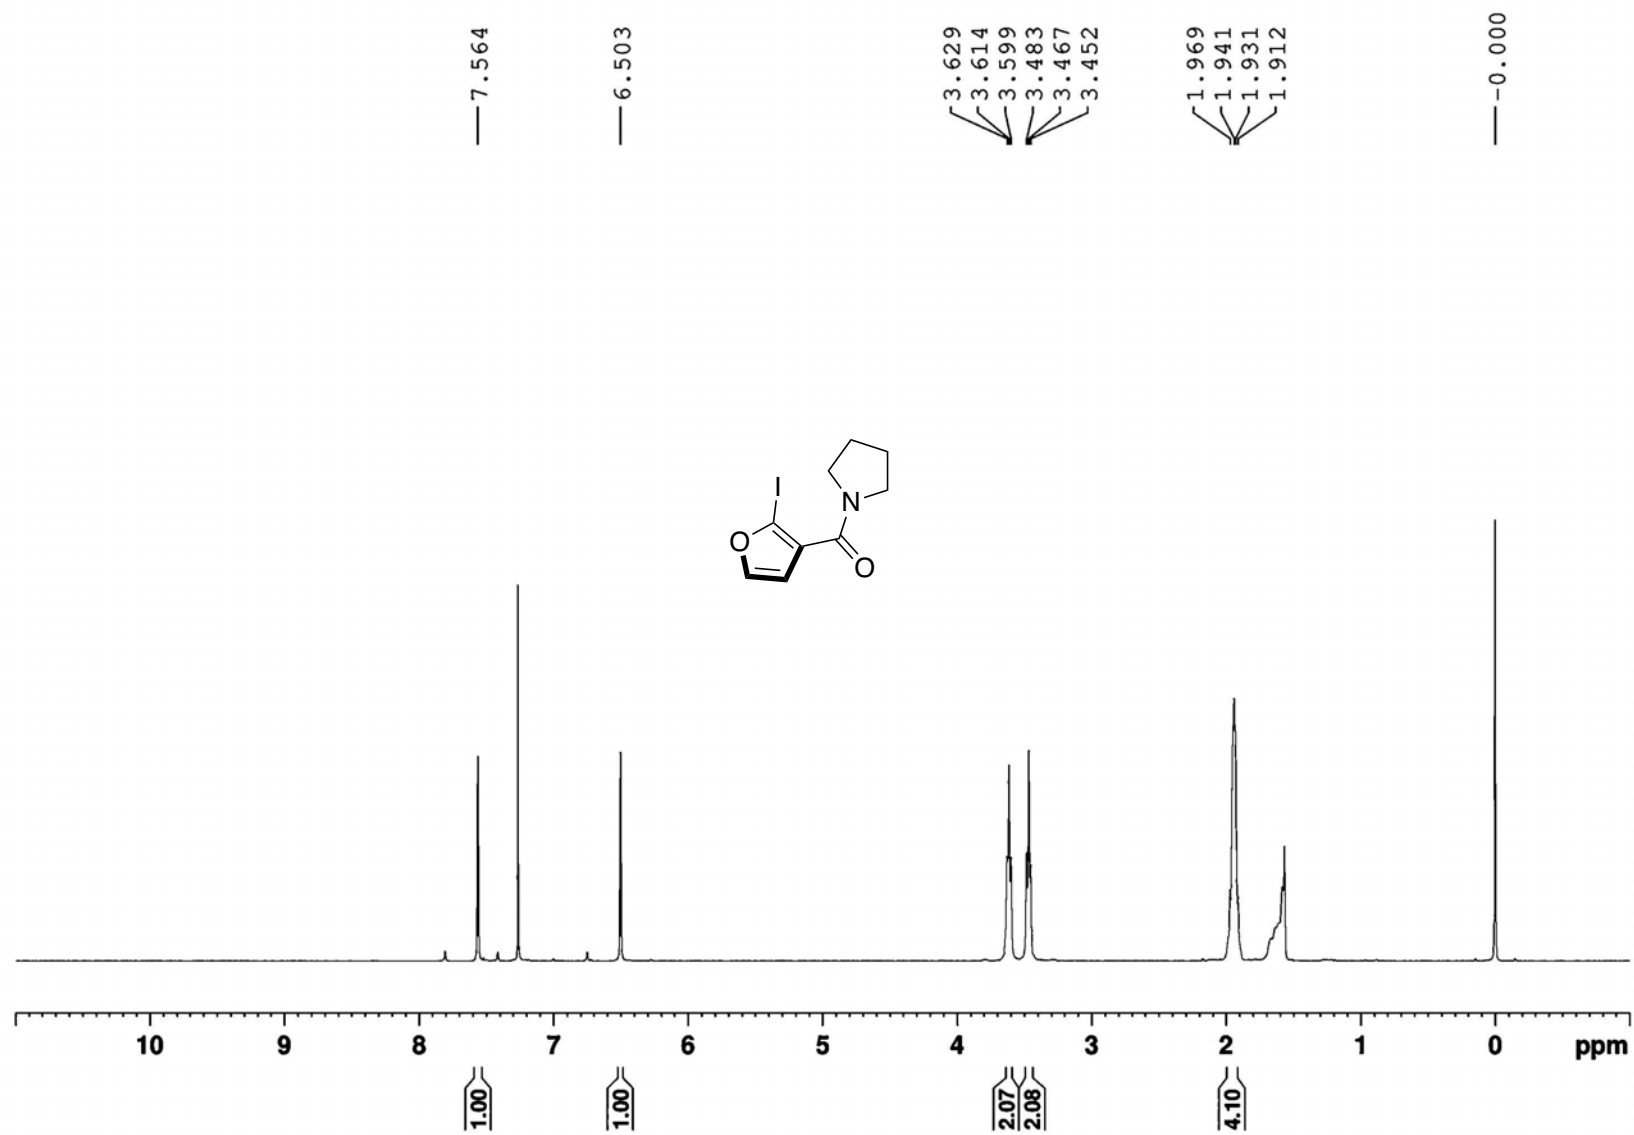

Supplementary Fig. 98 | <sup>1</sup>H NMR spectrum of 7a-B

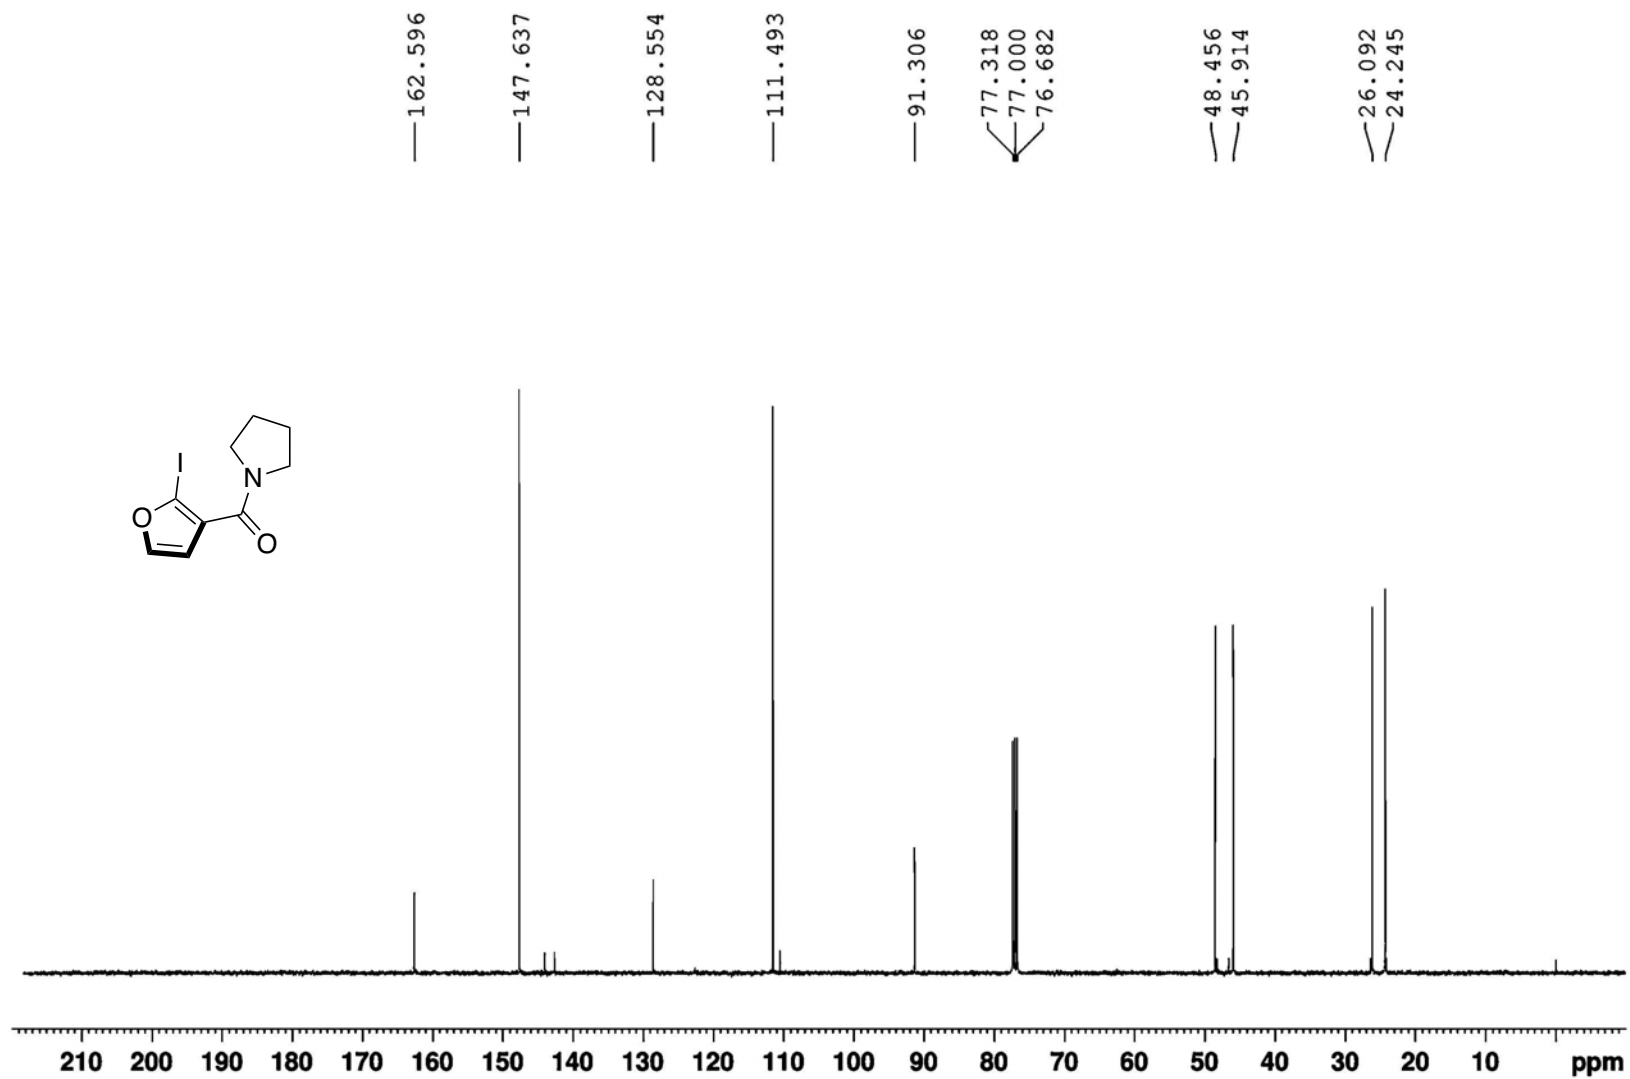

Supplementary Fig. 99 | <sup>13</sup>C NMR spectrum of 7a-B

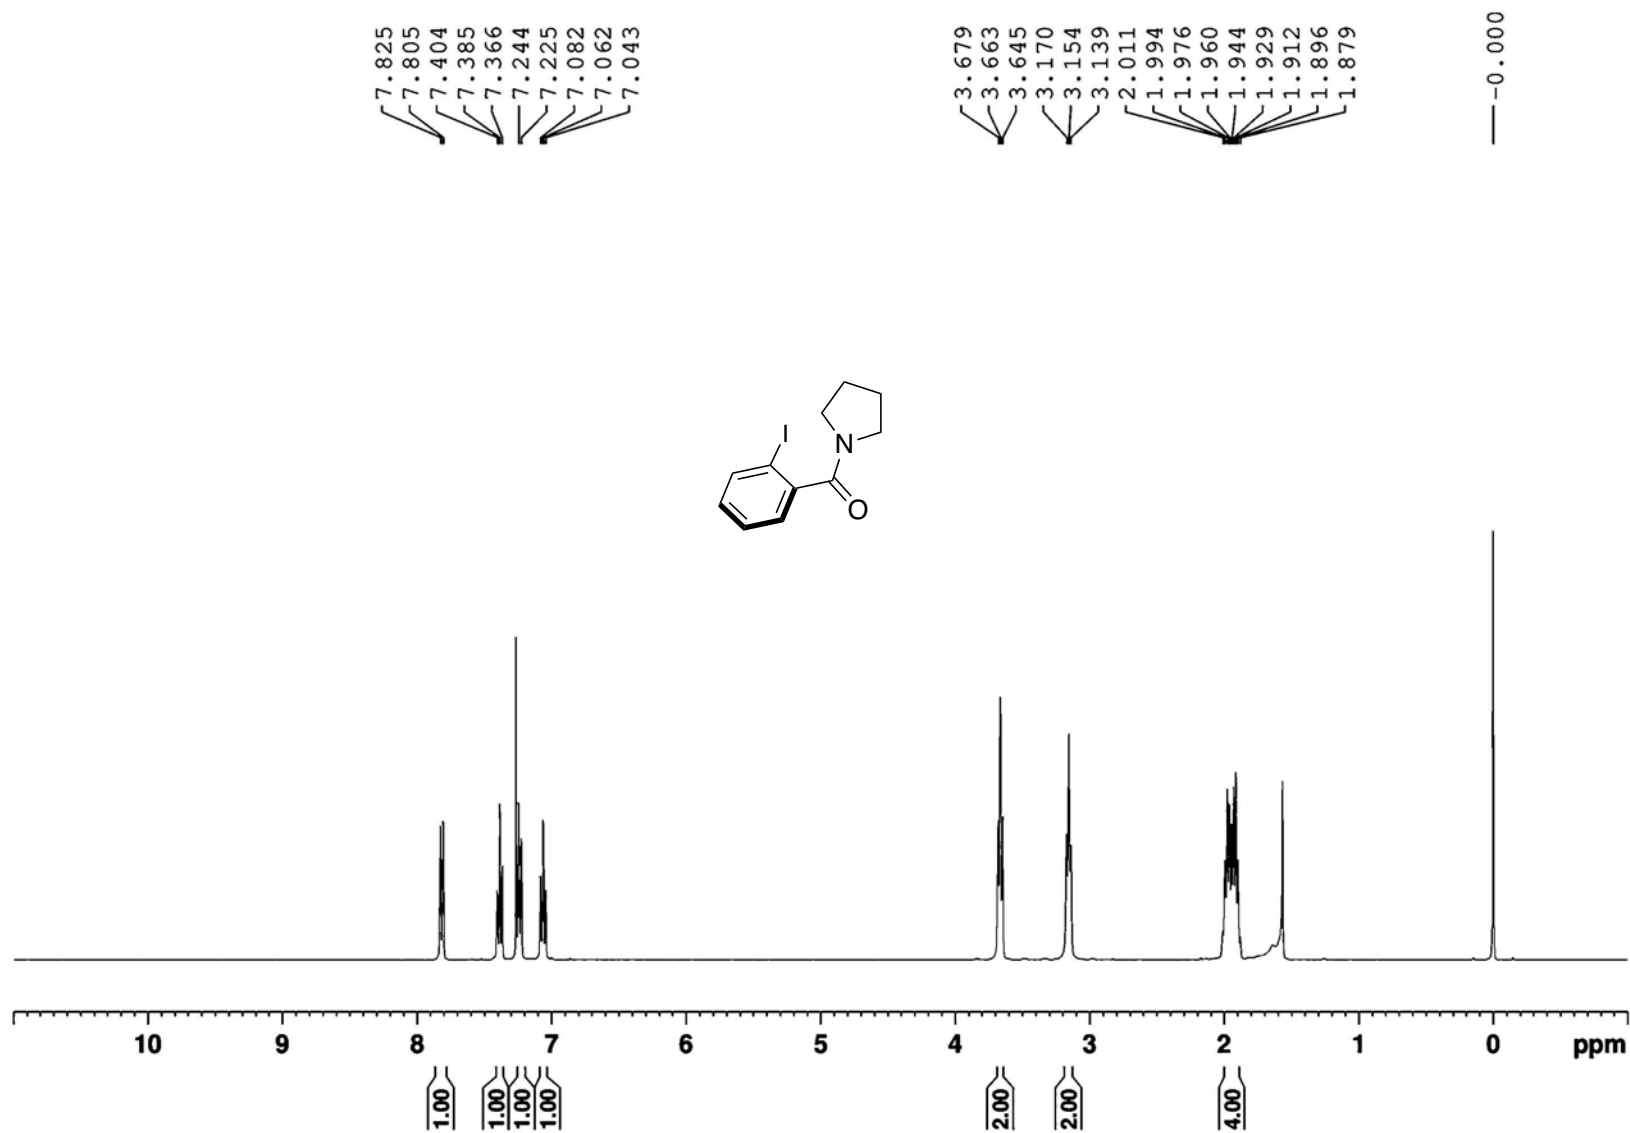

Supplementary Fig. 100 | <sup>1</sup>H NMR spectrum of 7a-C

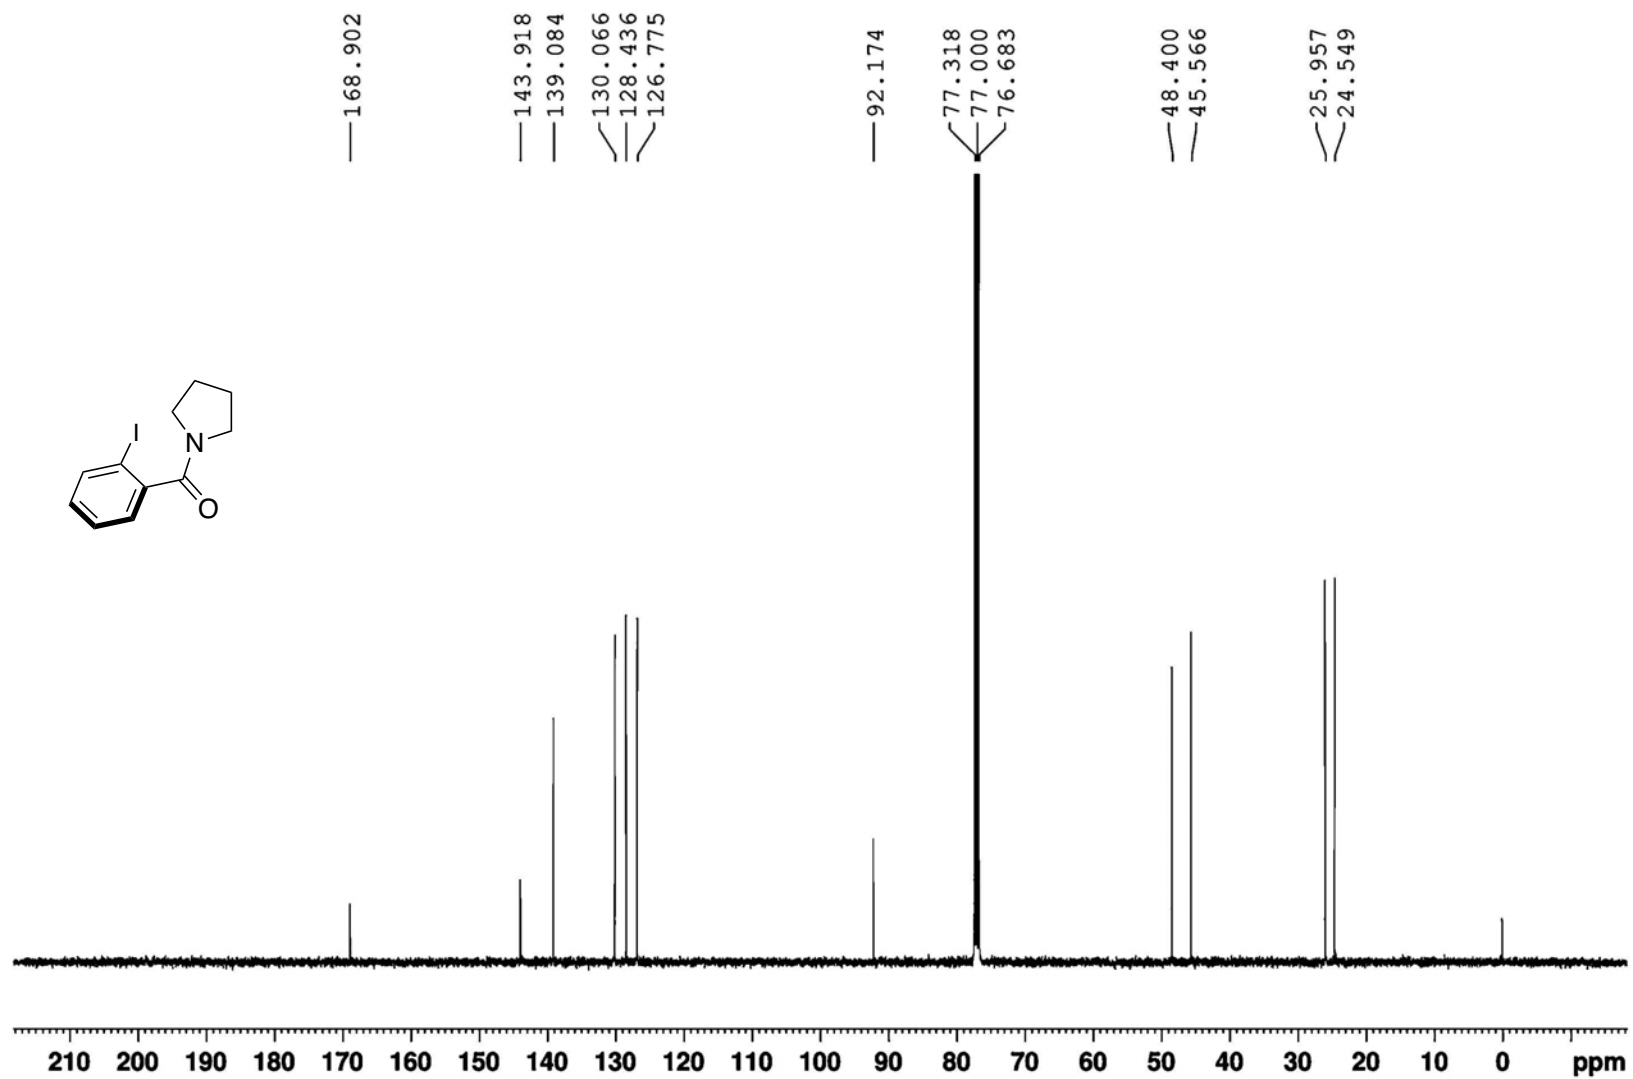

Supplementary Fig. 101 | <sup>13</sup>C NMR spectrum of 7a-C

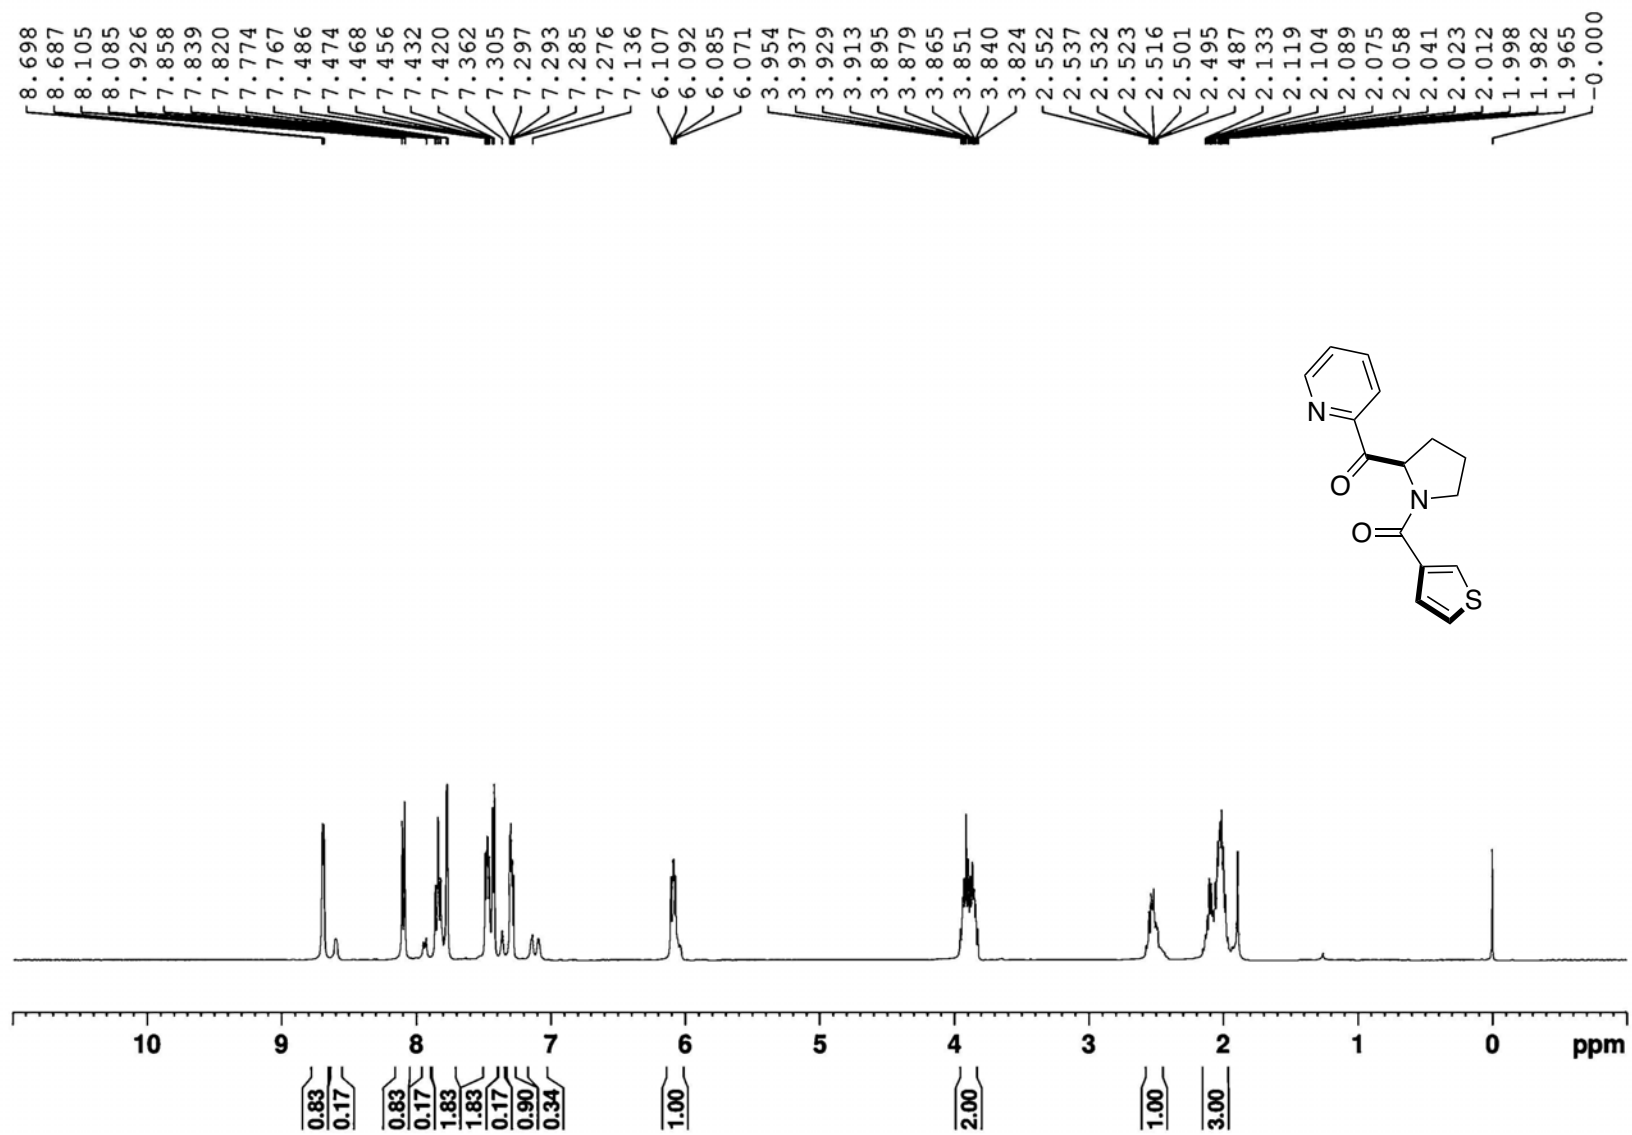

Supplementary Fig. 102 | <sup>1</sup>H NMR spectrum of 8ma

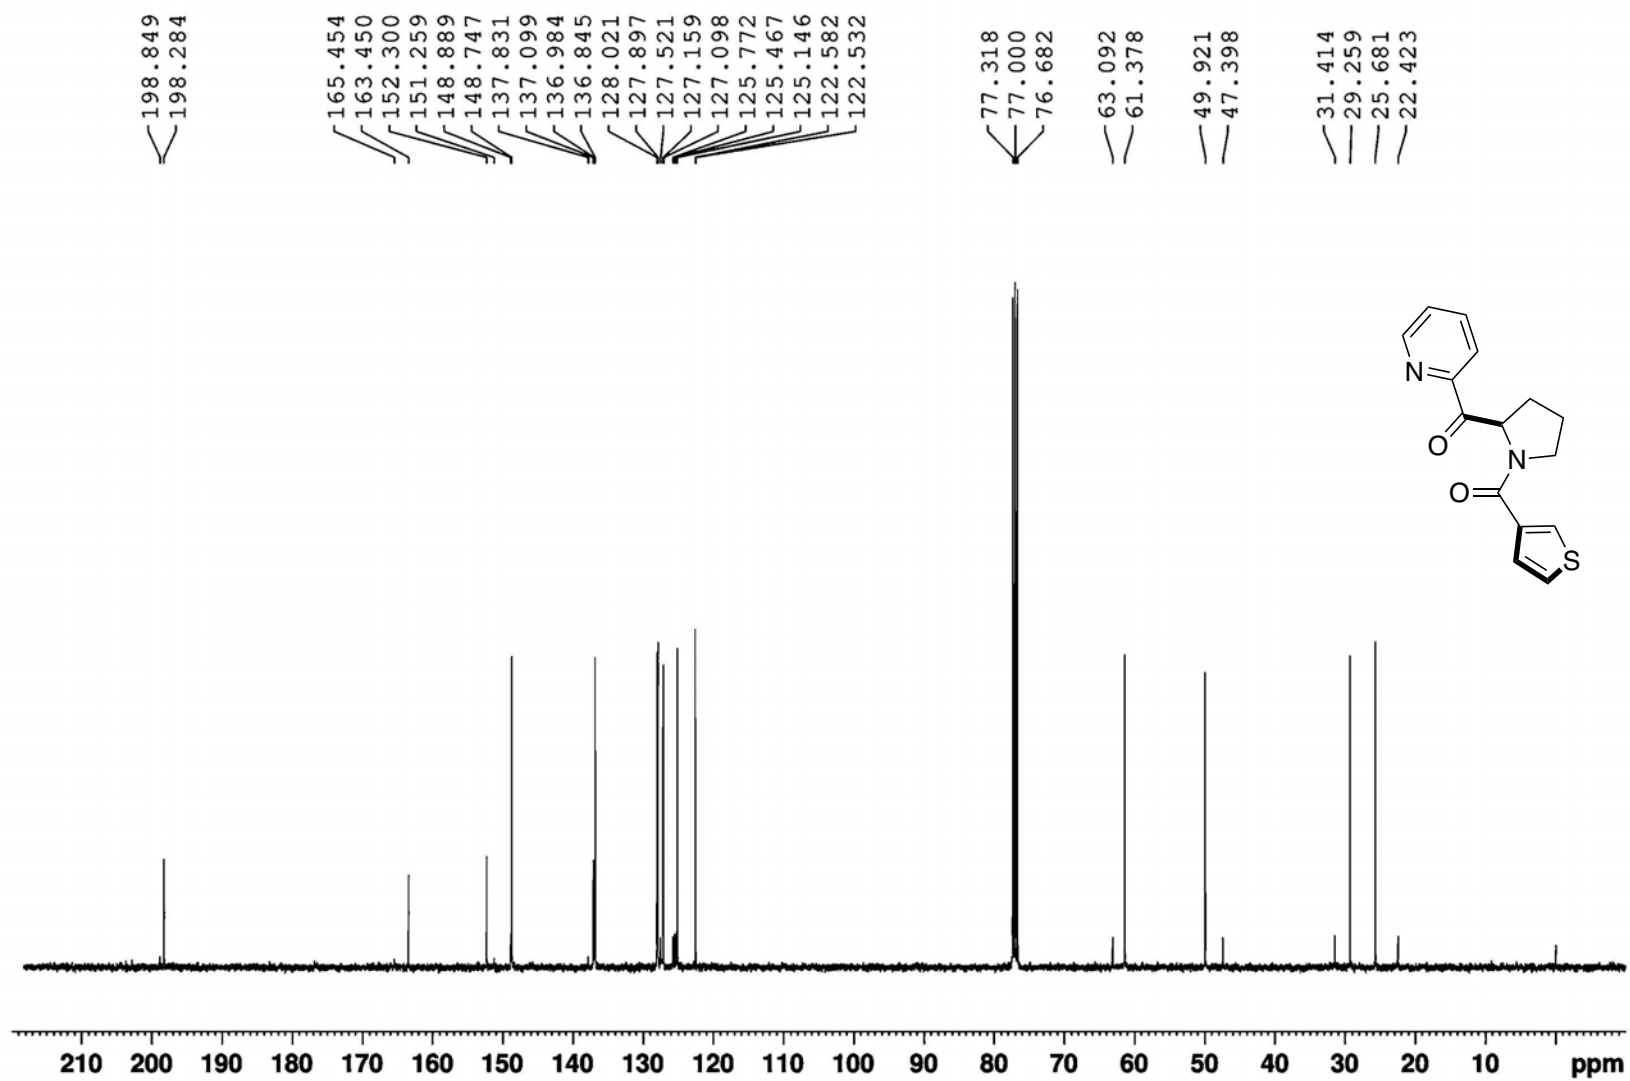

Supplementary Fig. 103 |  $^{13}\text{C}$  NMR spectrum of 8ma



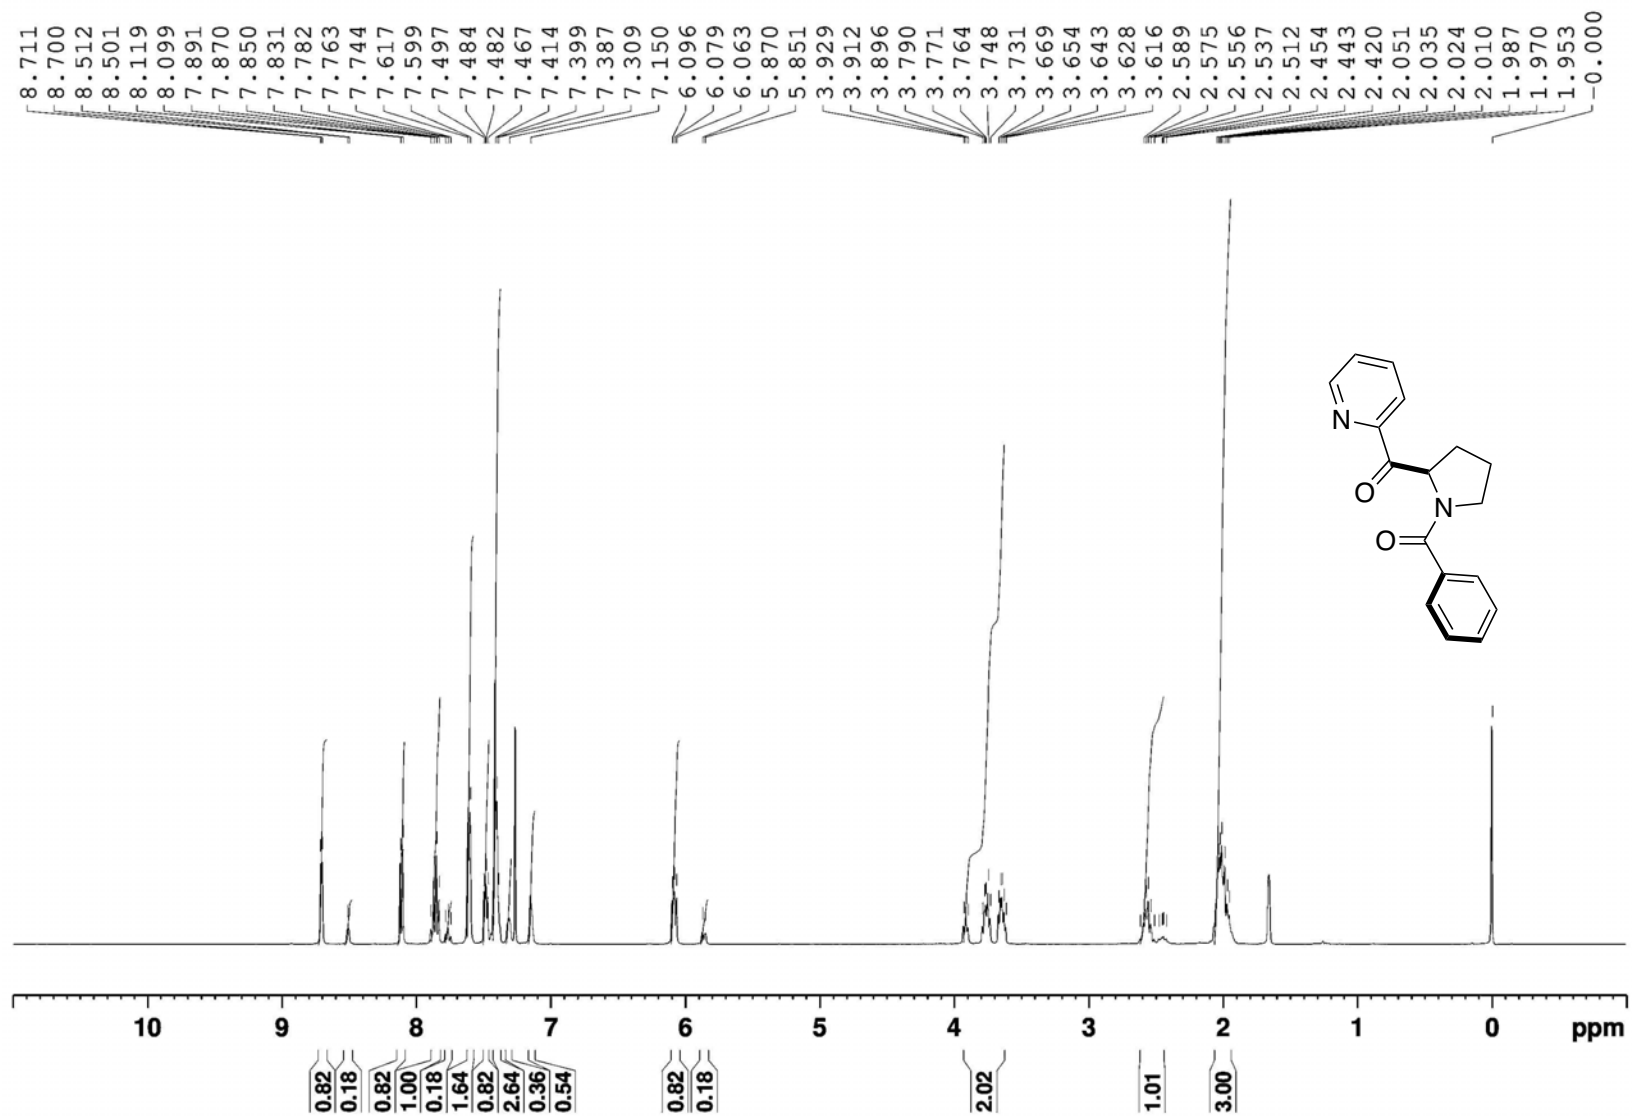

Supplementary Fig. 104 | <sup>1</sup>H NMR spectrum of 8ma-C

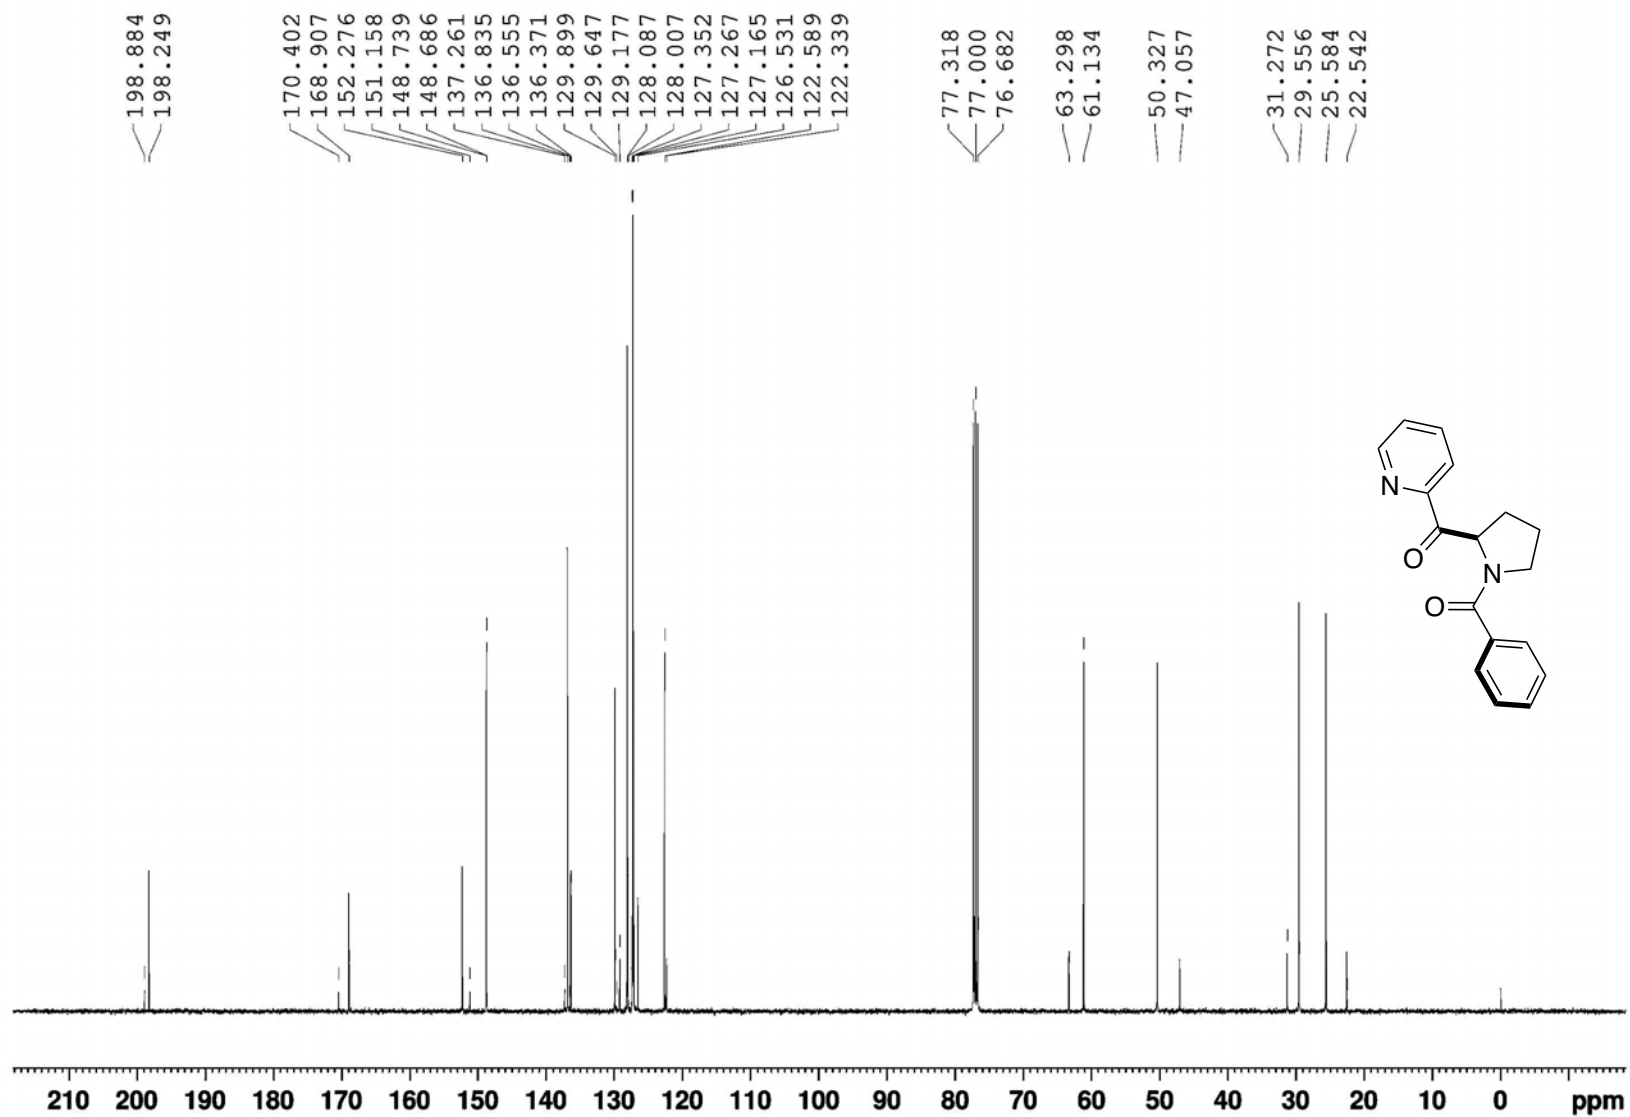

Supplementary Fig. 105 | <sup>13</sup>C NMR spectrum of 8ma-C

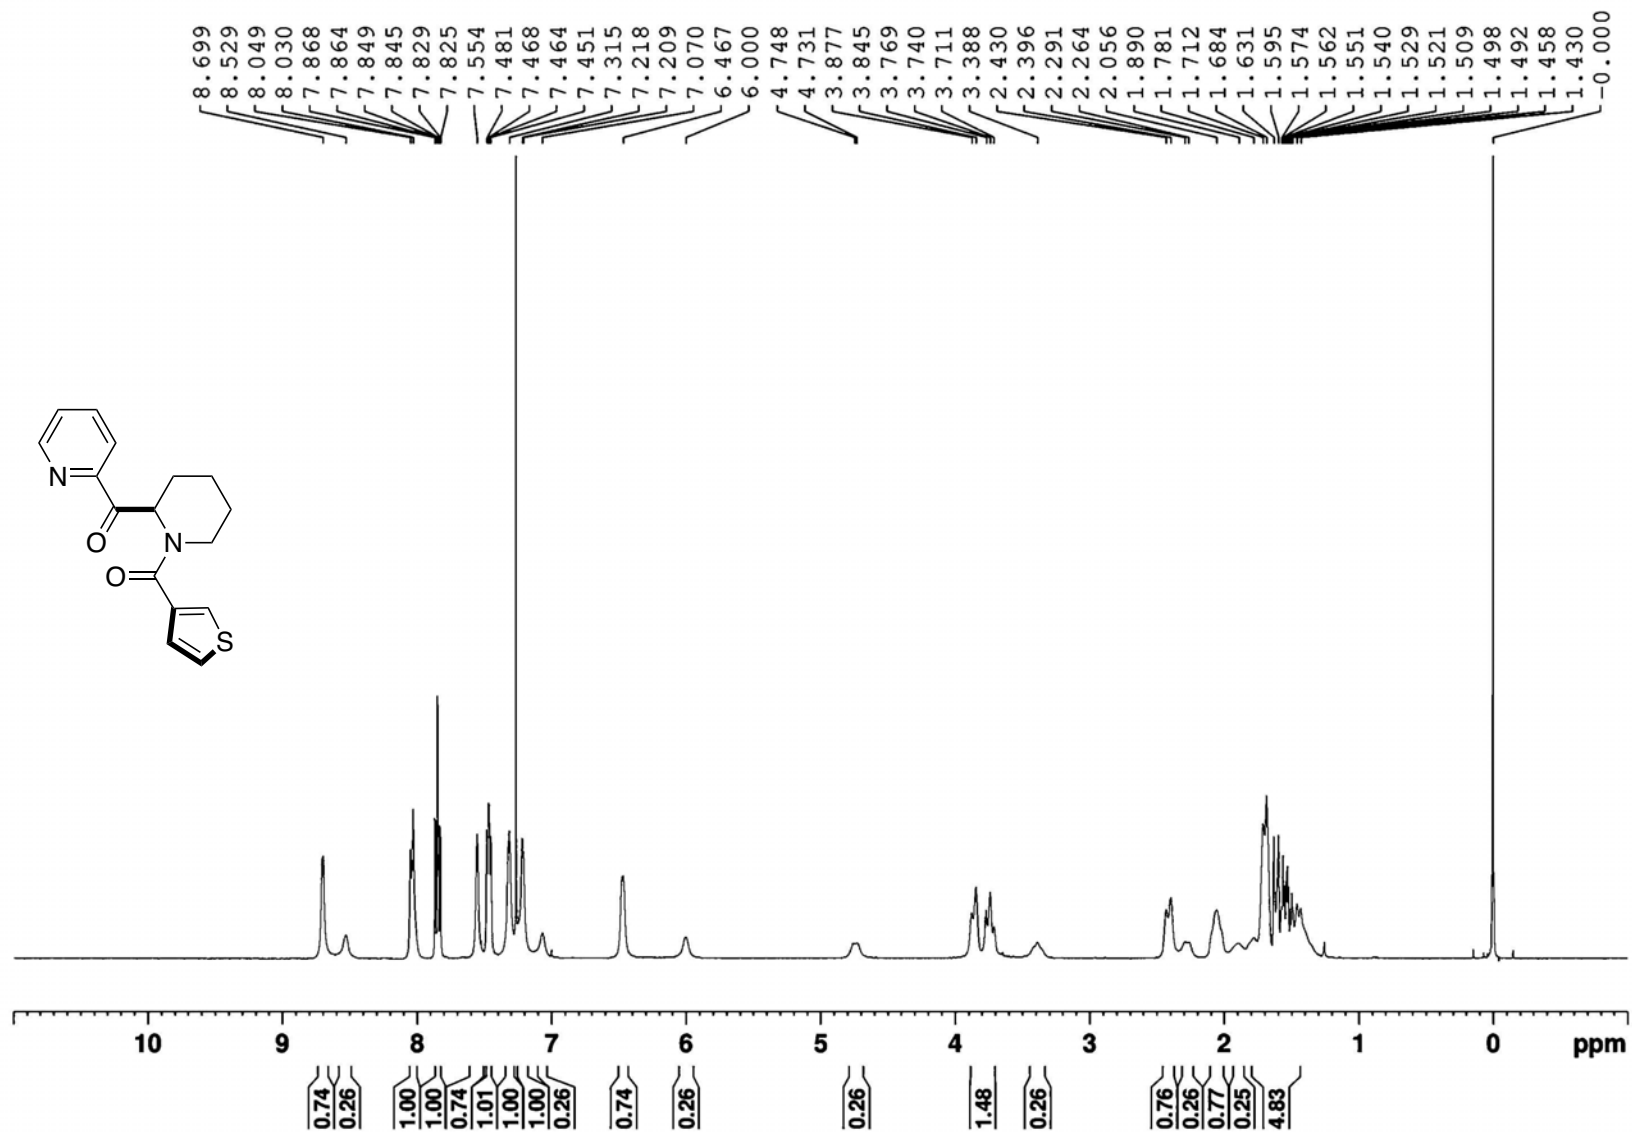

Supplementary Fig. 106 | <sup>1</sup>H NMR spectrum of 8mb

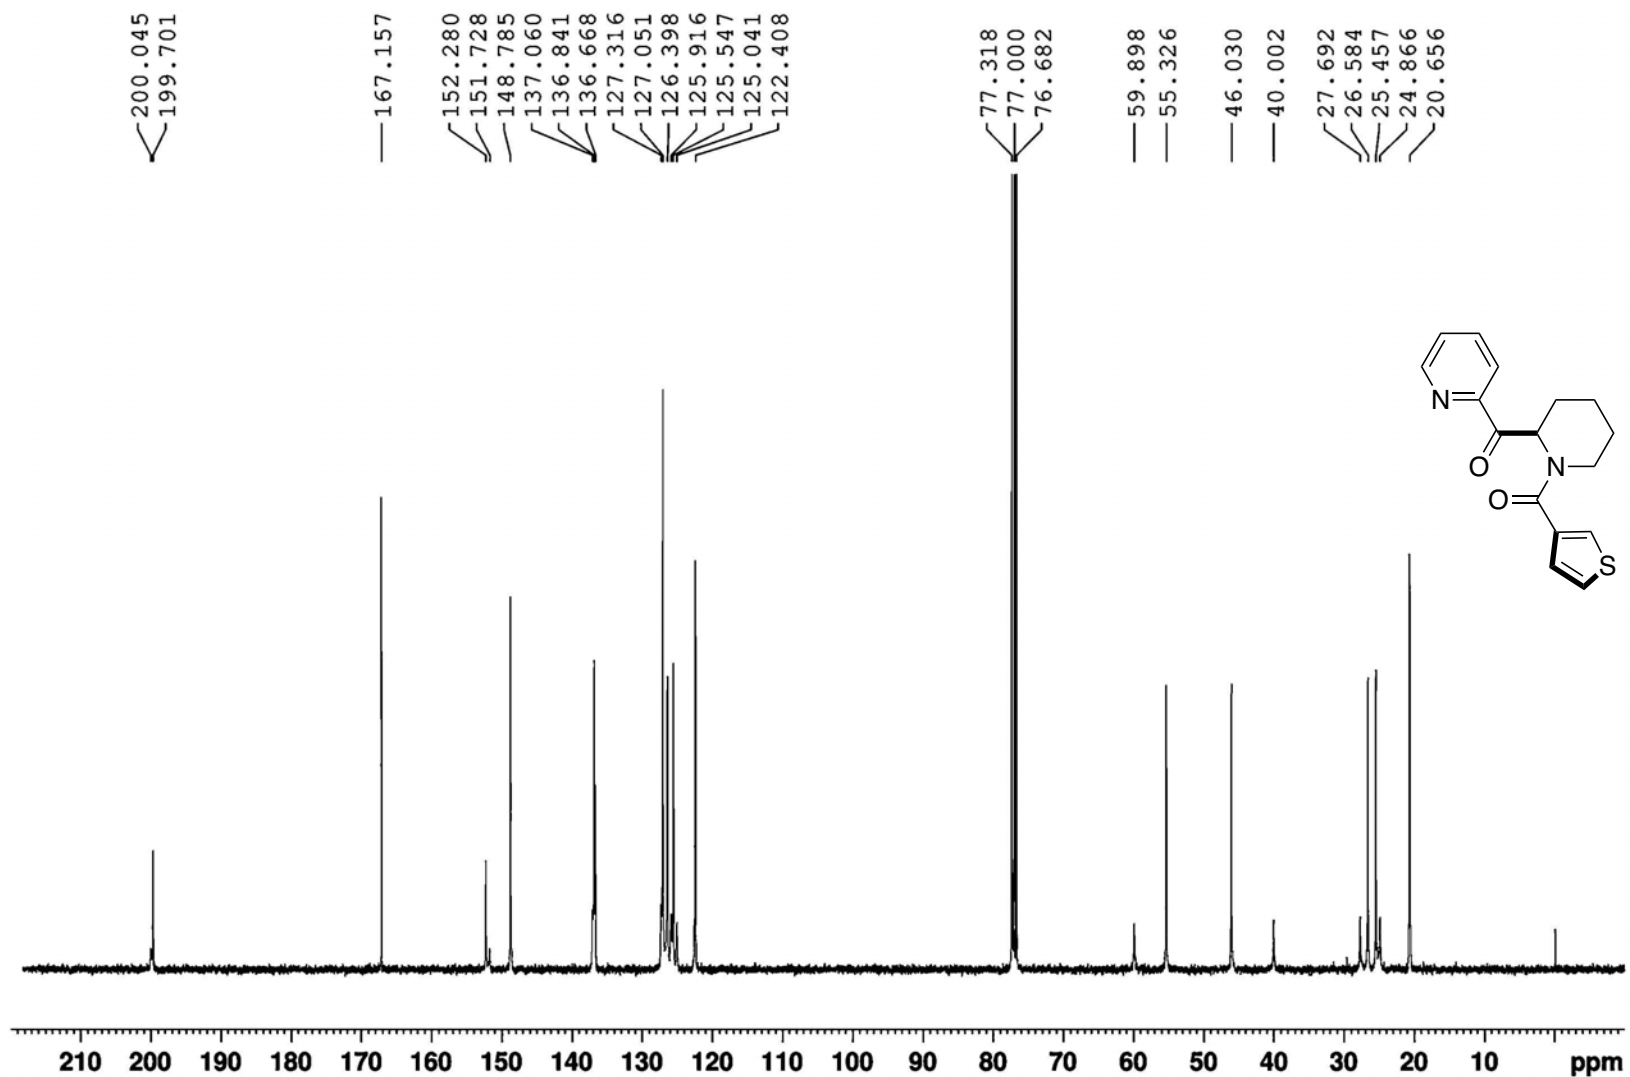

Supplementary Fig. 107 | <sup>13</sup>C NMR spectrum of 8mb

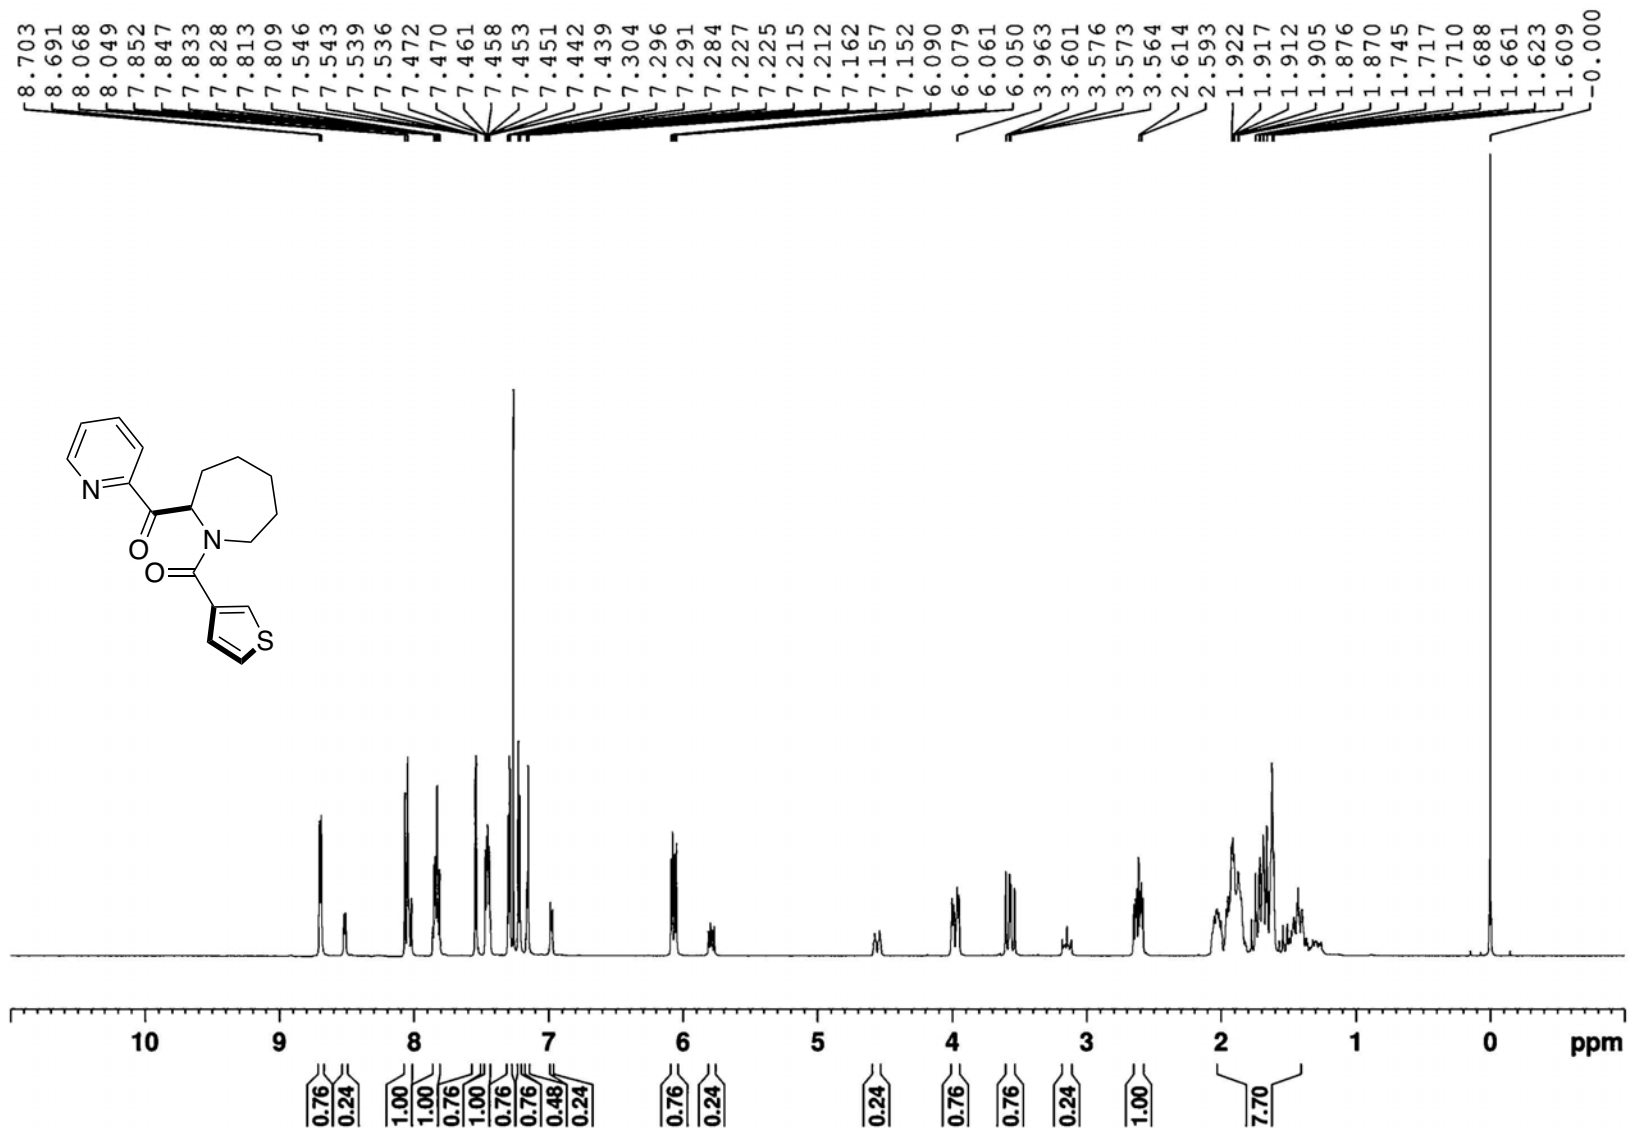

Supplementary Fig. 108 | <sup>1</sup>H NMR spectrum of 8mc

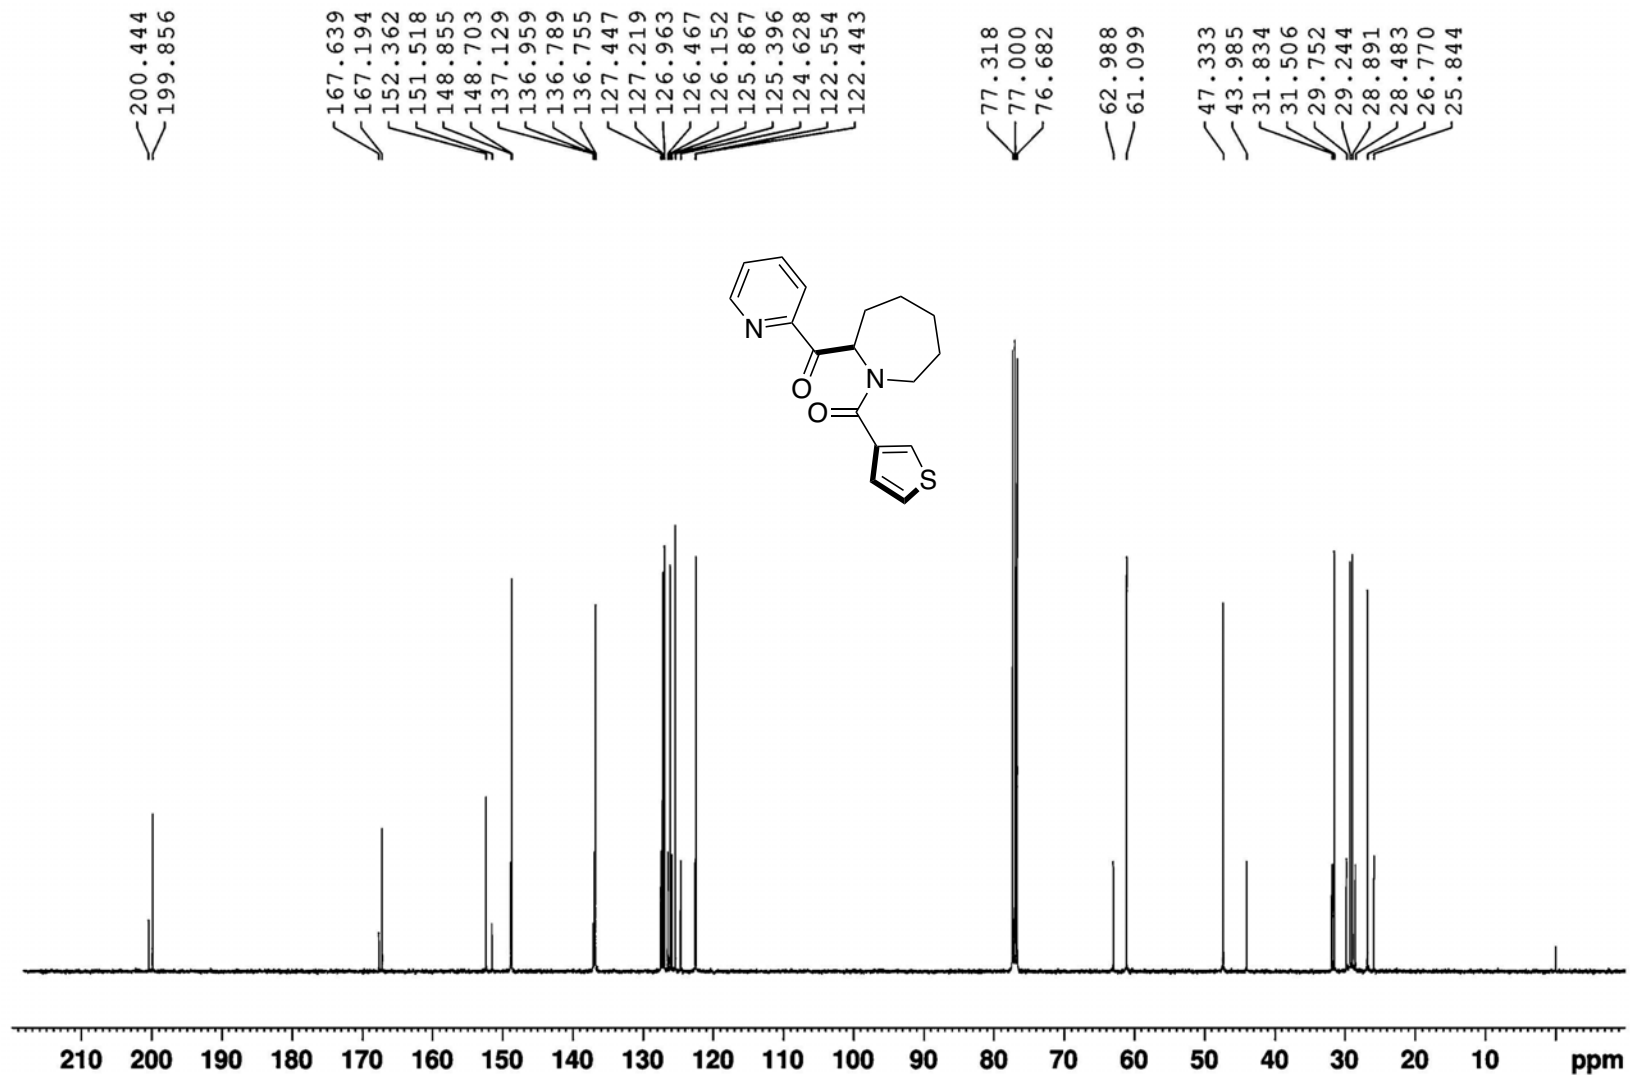

Supplementary Fig. 109 | <sup>13</sup>C NMR spectrum of 8mc

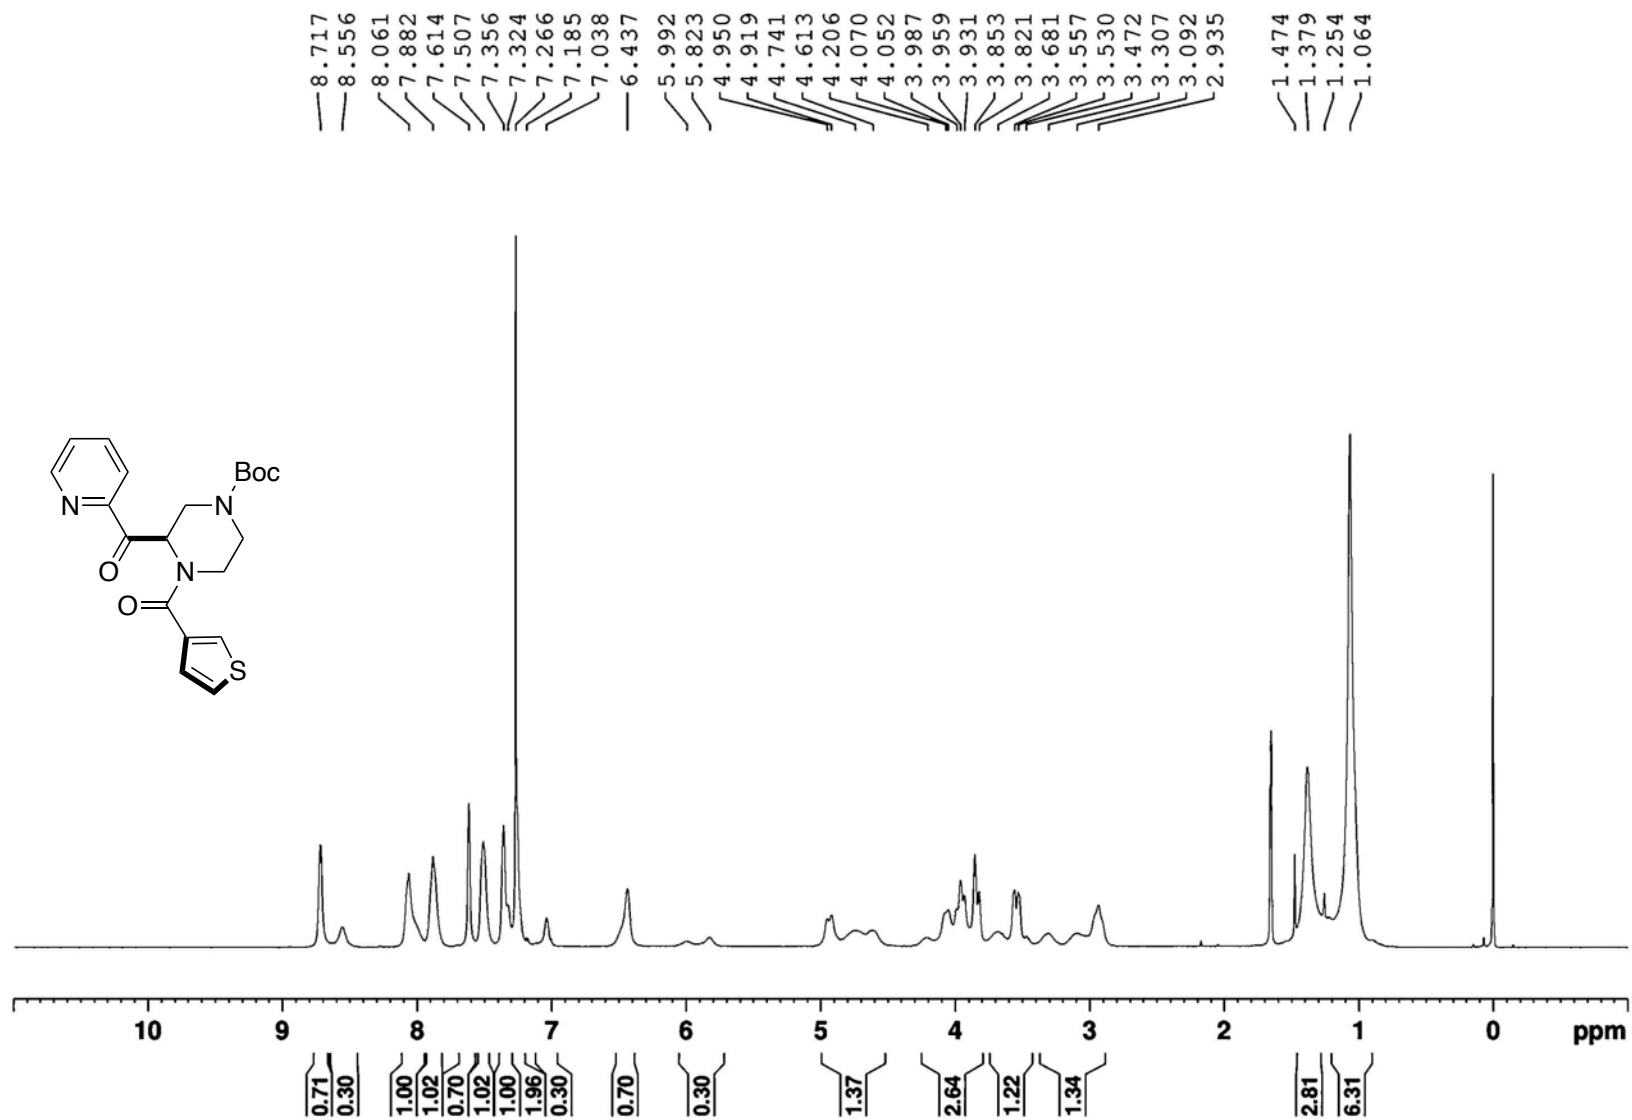

Supplementary Fig. 110 | <sup>1</sup>H NMR spectrum of **8md**

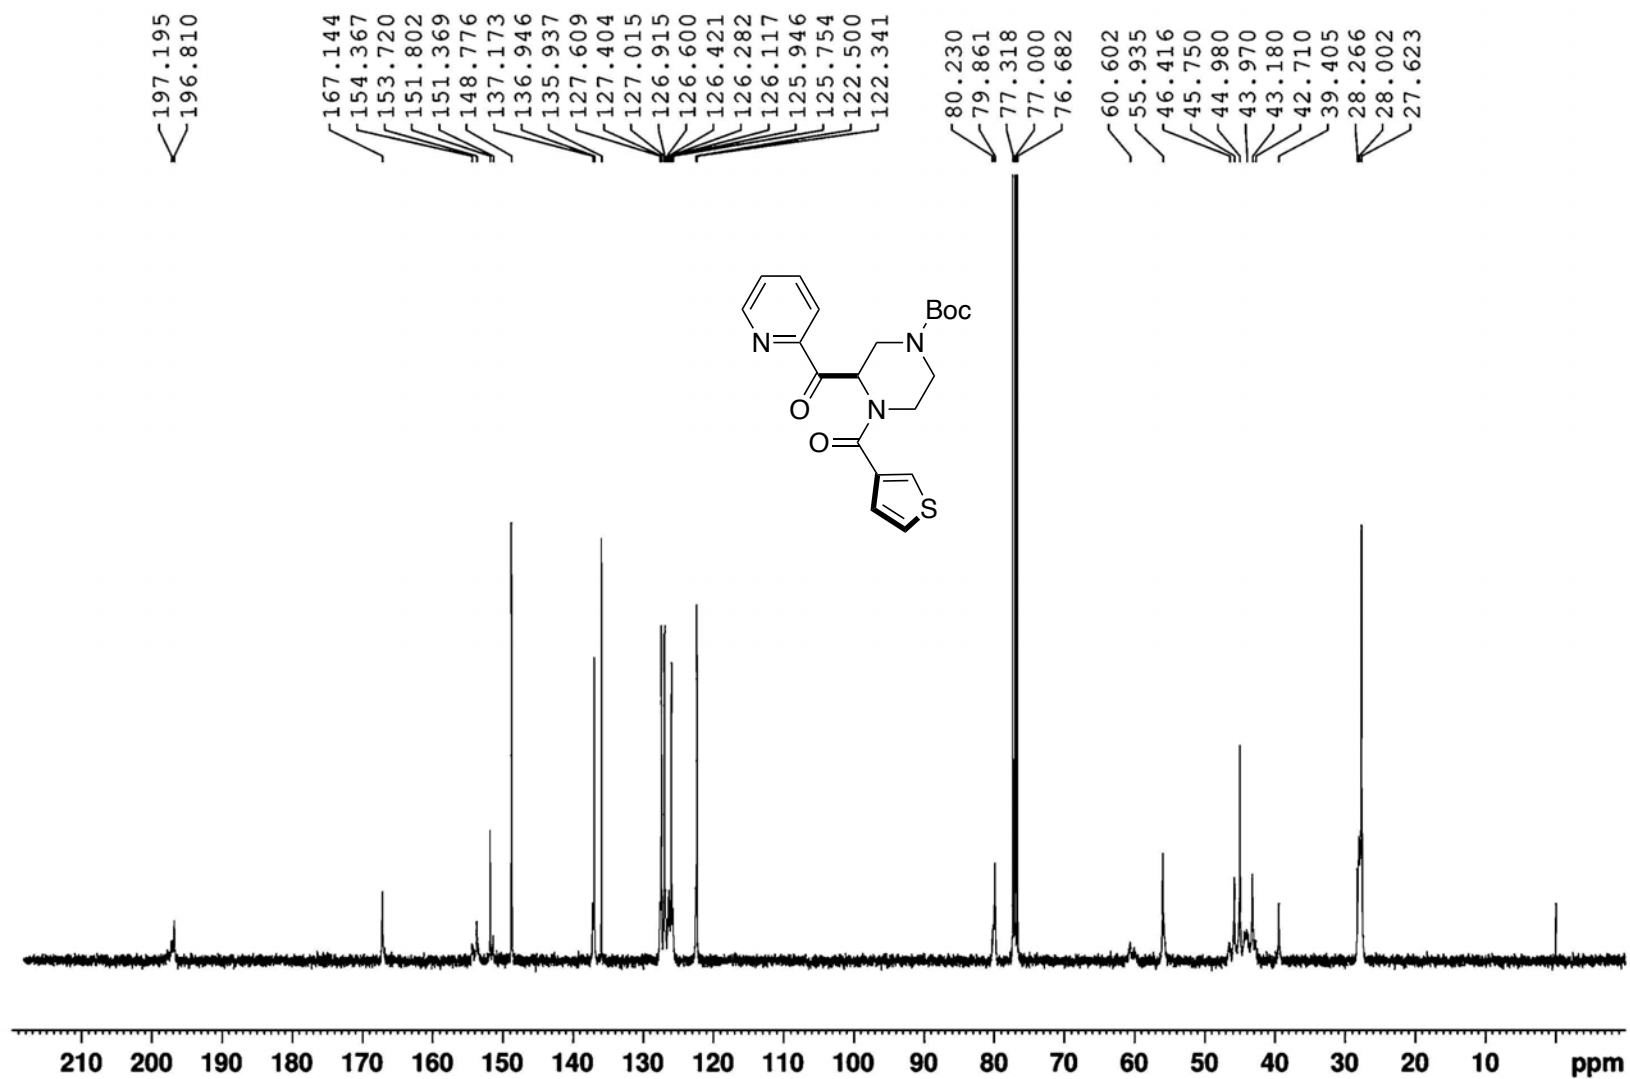

Supplementary Fig. 111 | <sup>13</sup>C NMR spectrum of 8md



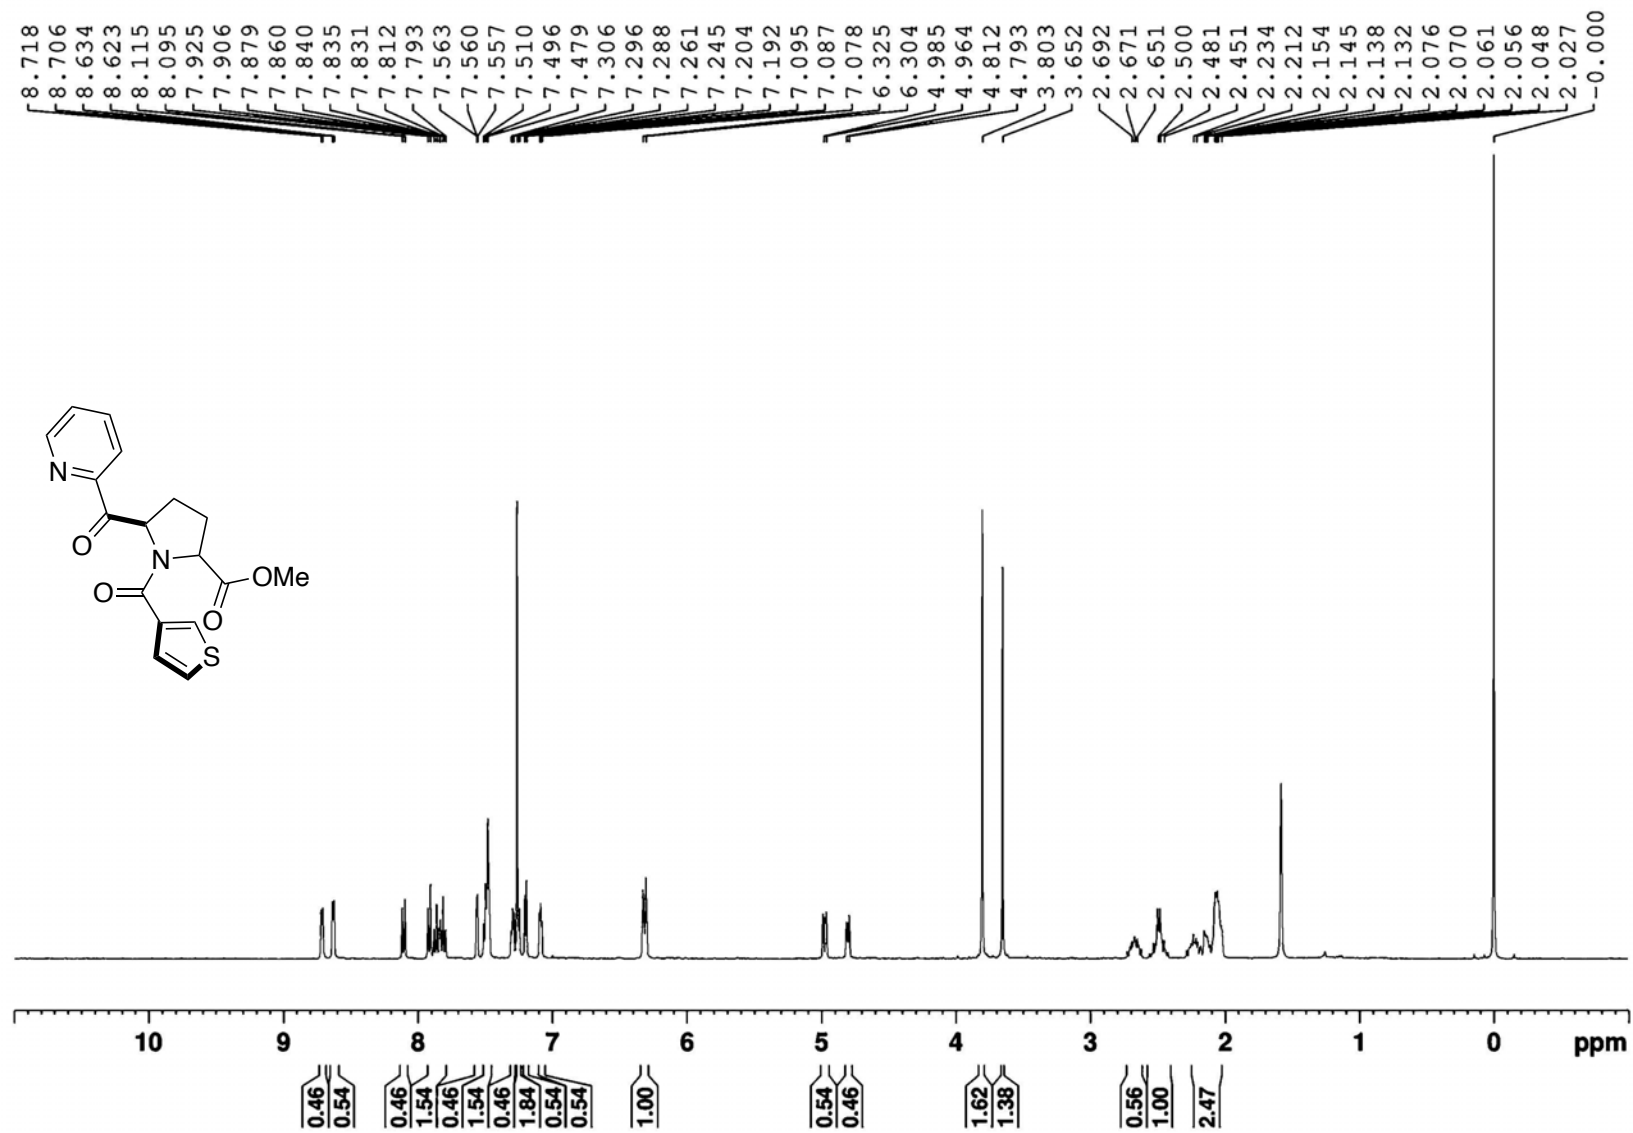

Supplementary Fig. 112 | <sup>1</sup>H NMR spectrum of 8me

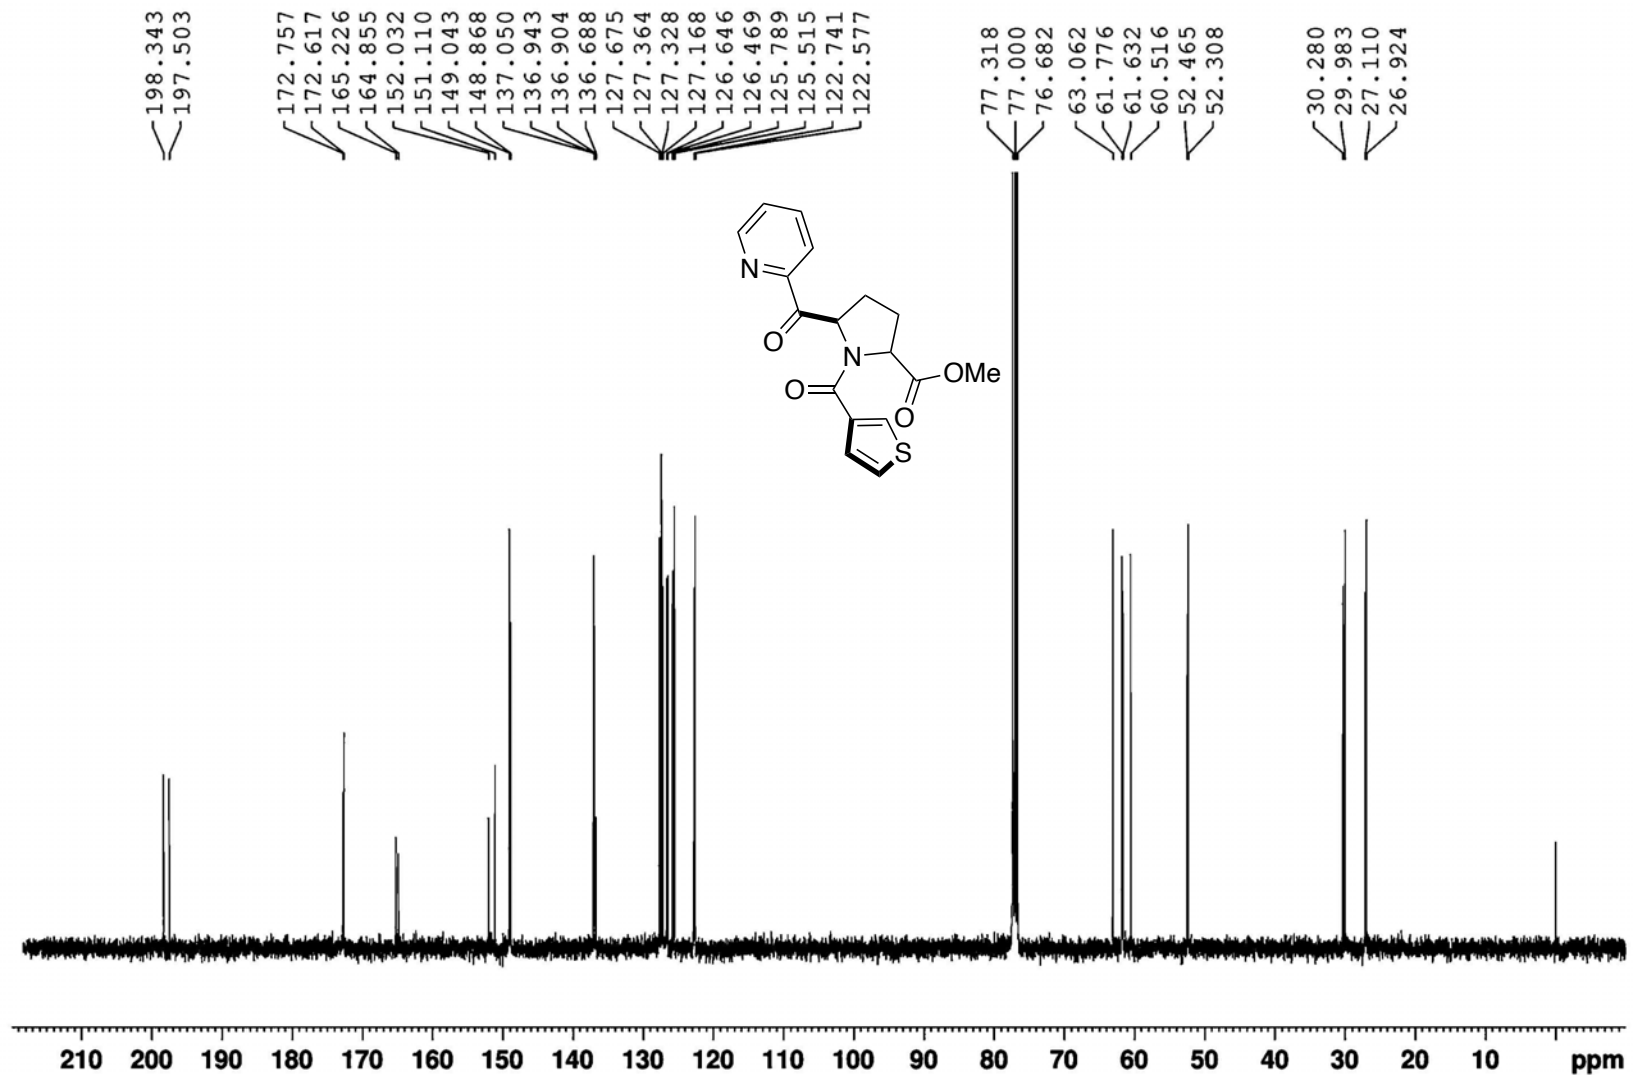

Supplementary Fig. 113 | <sup>13</sup>C NMR spectrum of 8me

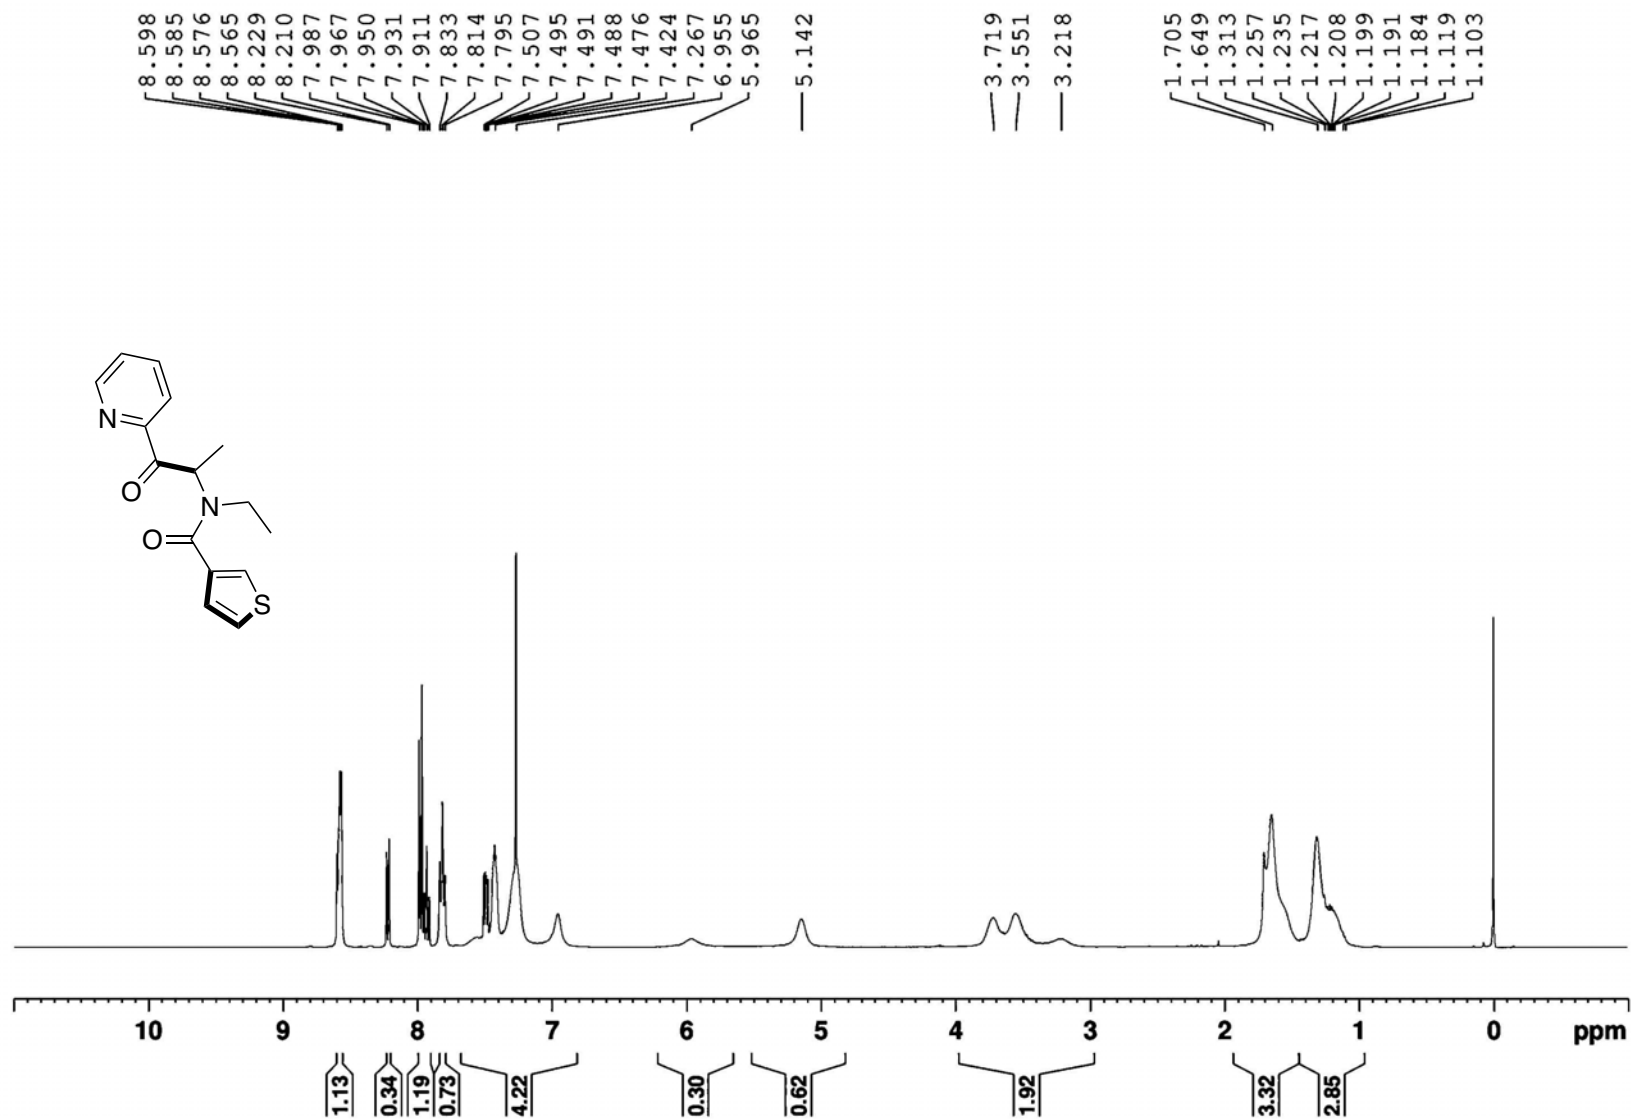

Supplementary Fig. 114 | <sup>1</sup>H NMR spectrum of 8mf

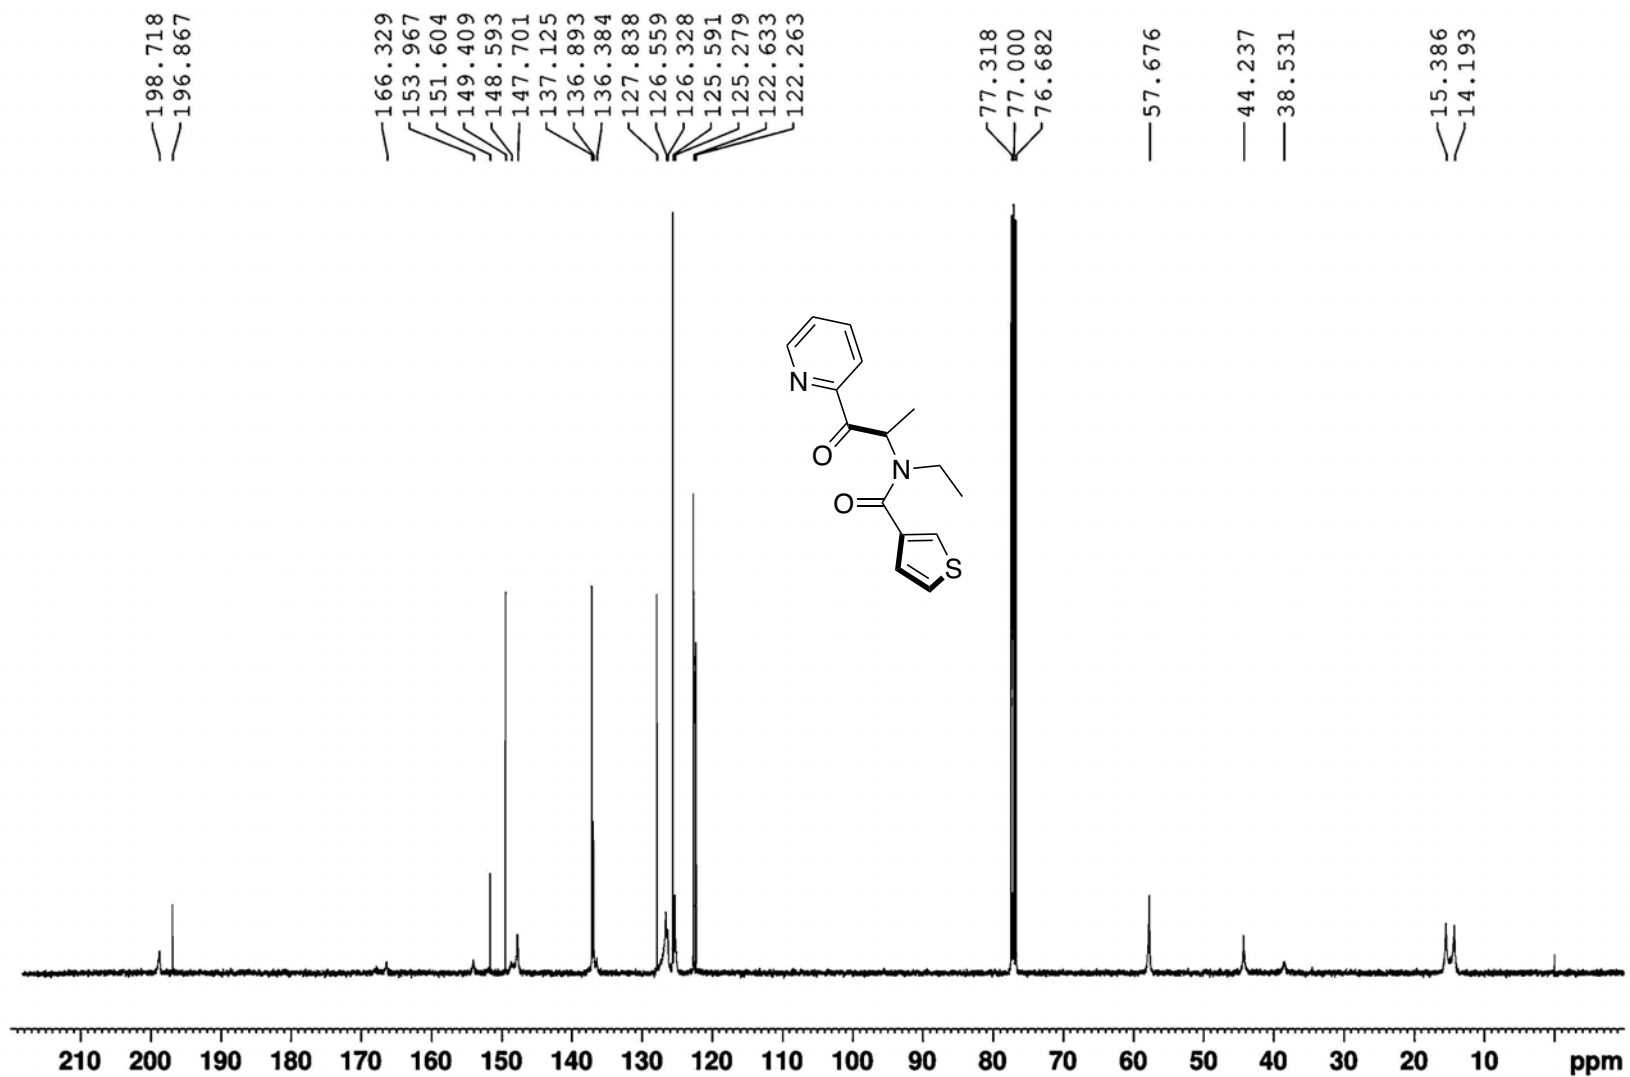

Supplementary Fig. 115 | <sup>13</sup>C NMR spectrum of 8mf

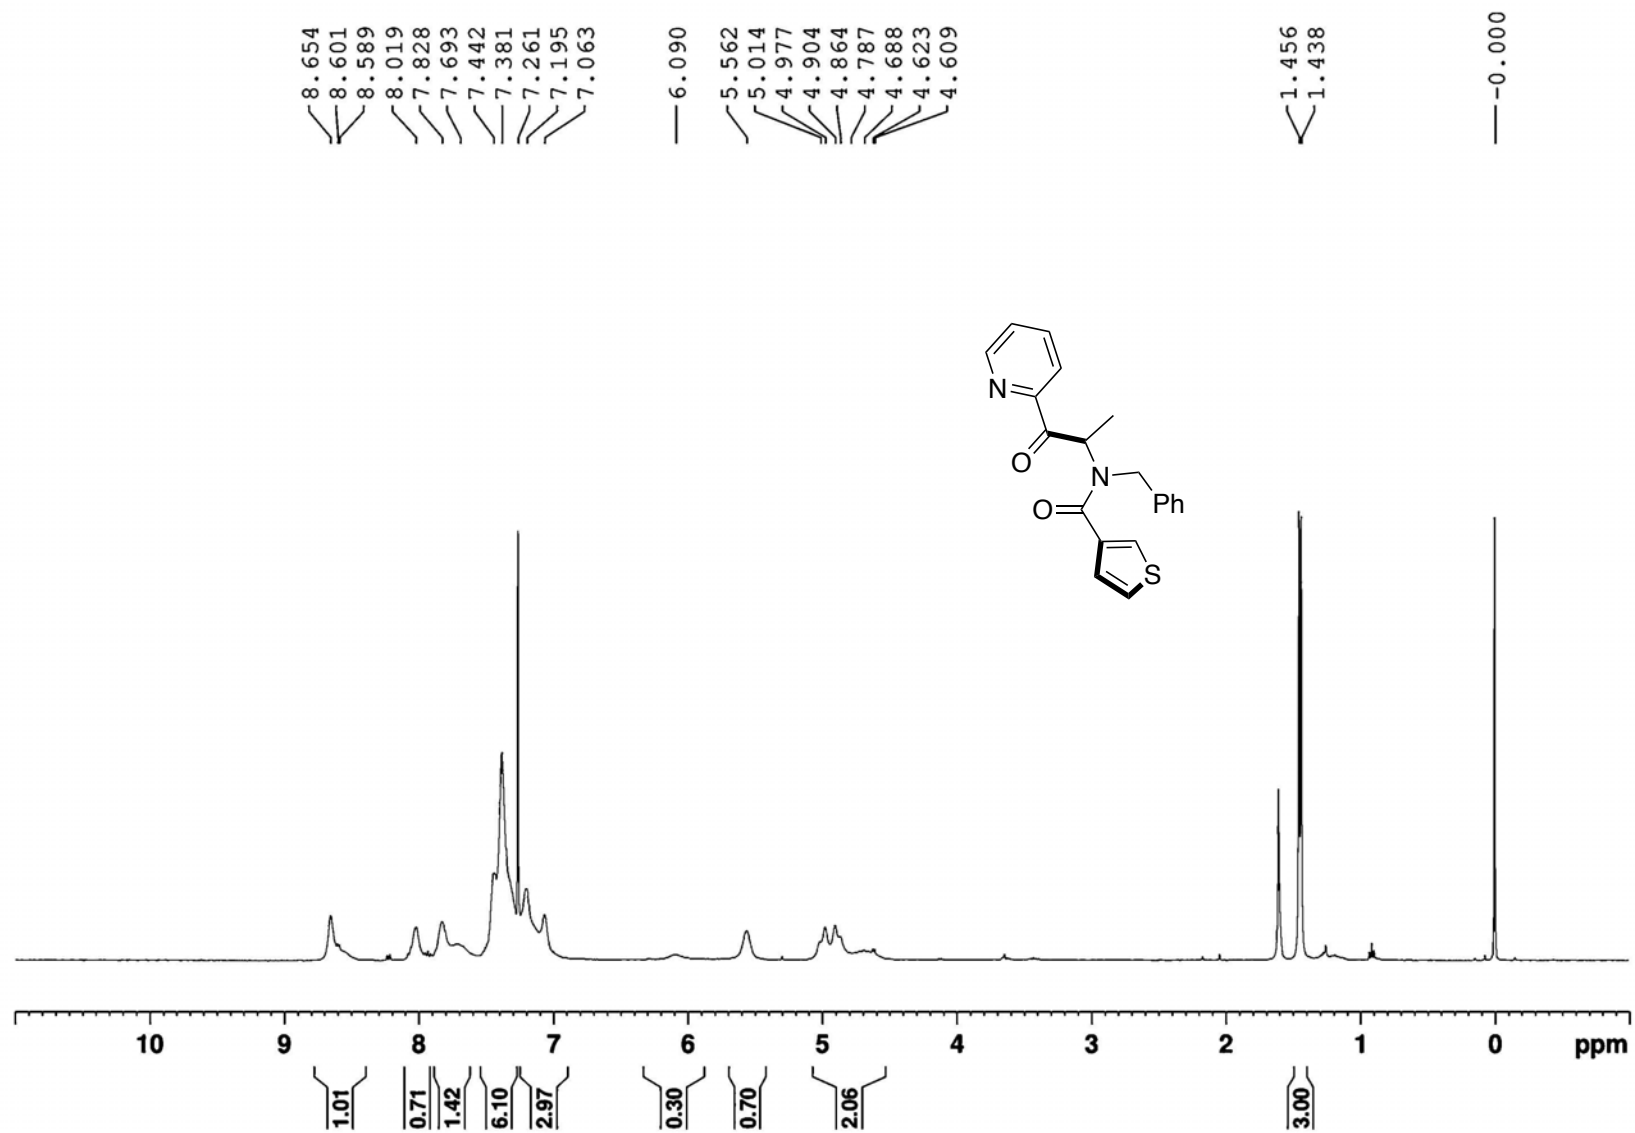

Supplementary Fig. 116 | <sup>1</sup>H NMR spectrum of 8mg-major

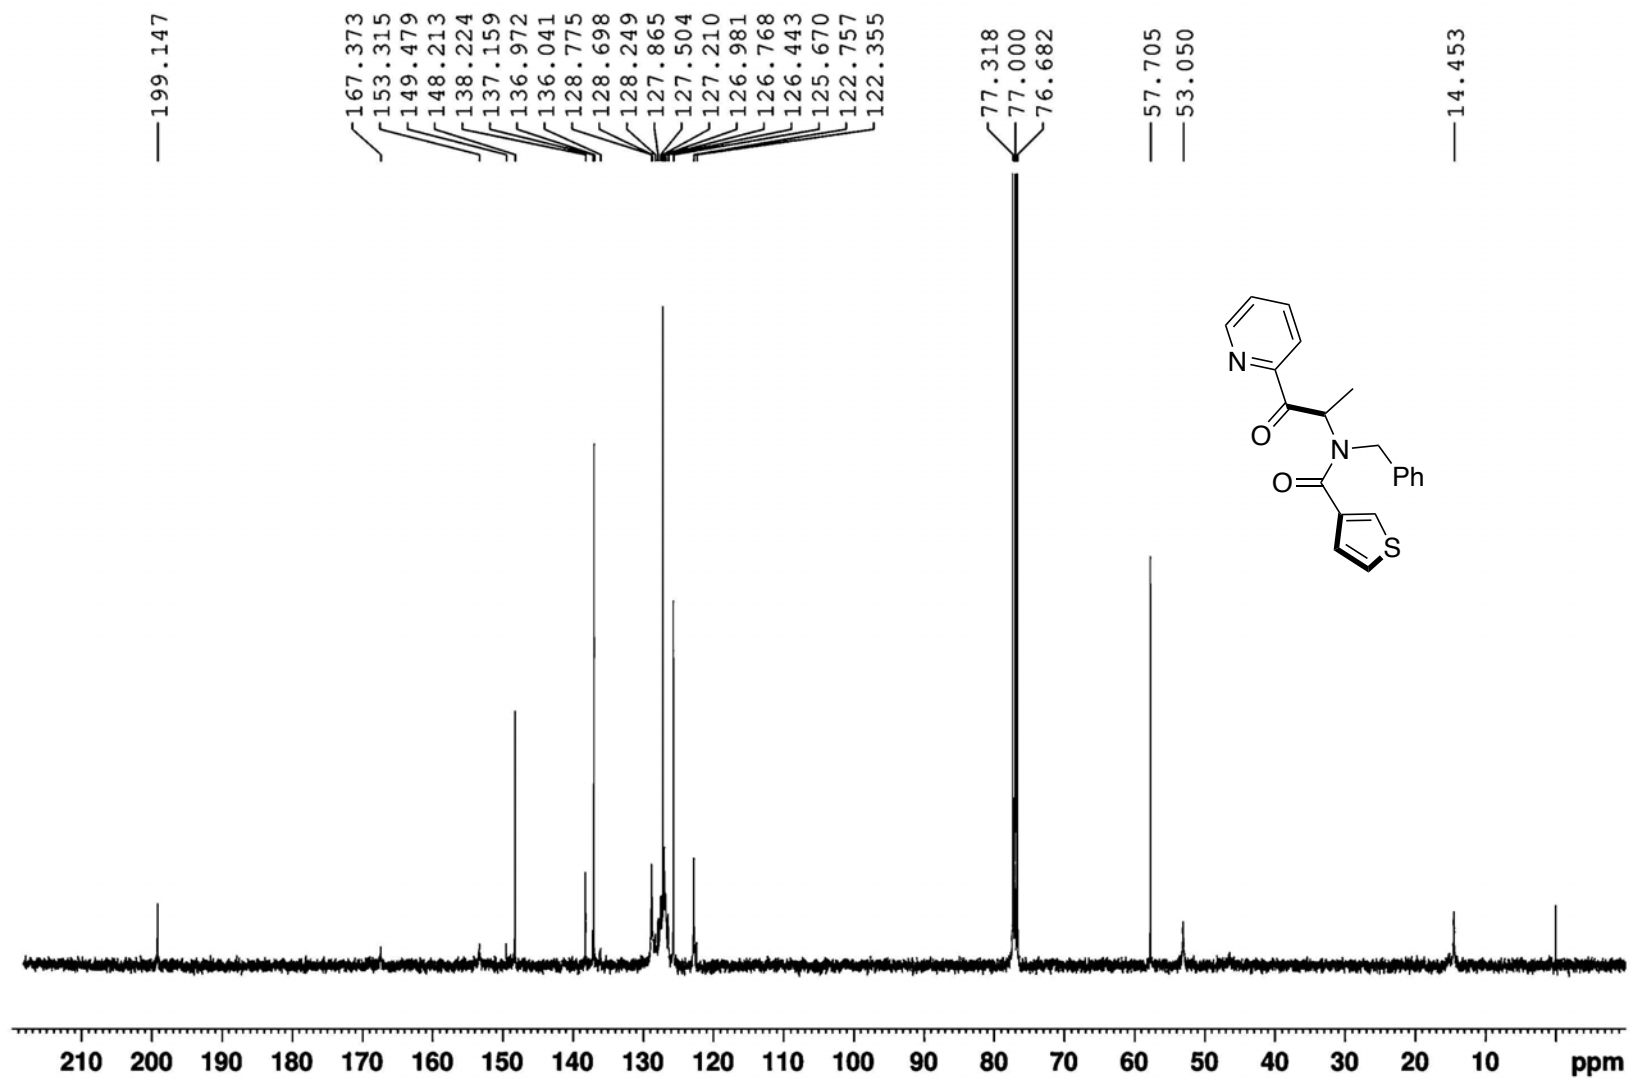

Supplementary Fig. 117 | <sup>13</sup>C NMR spectrum of 8mg-major

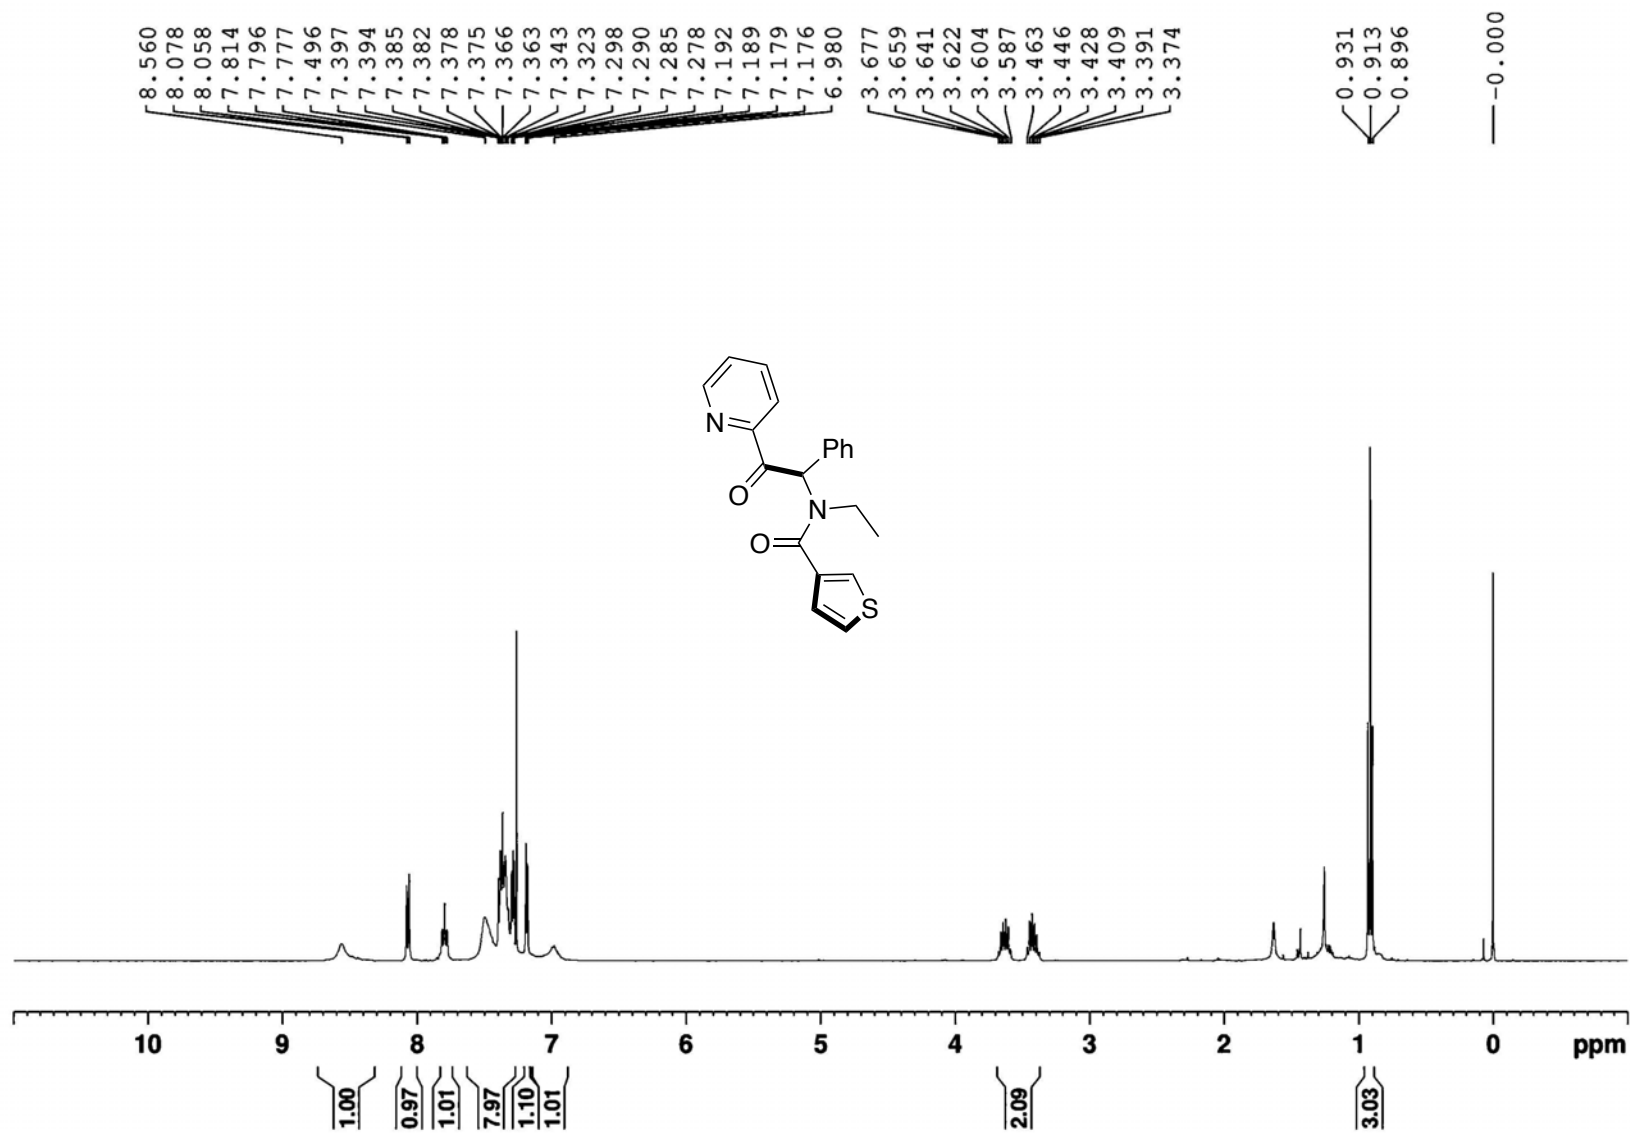

Supplementary Fig. 118 | <sup>1</sup>H NMR spectrum of 8mg-minor

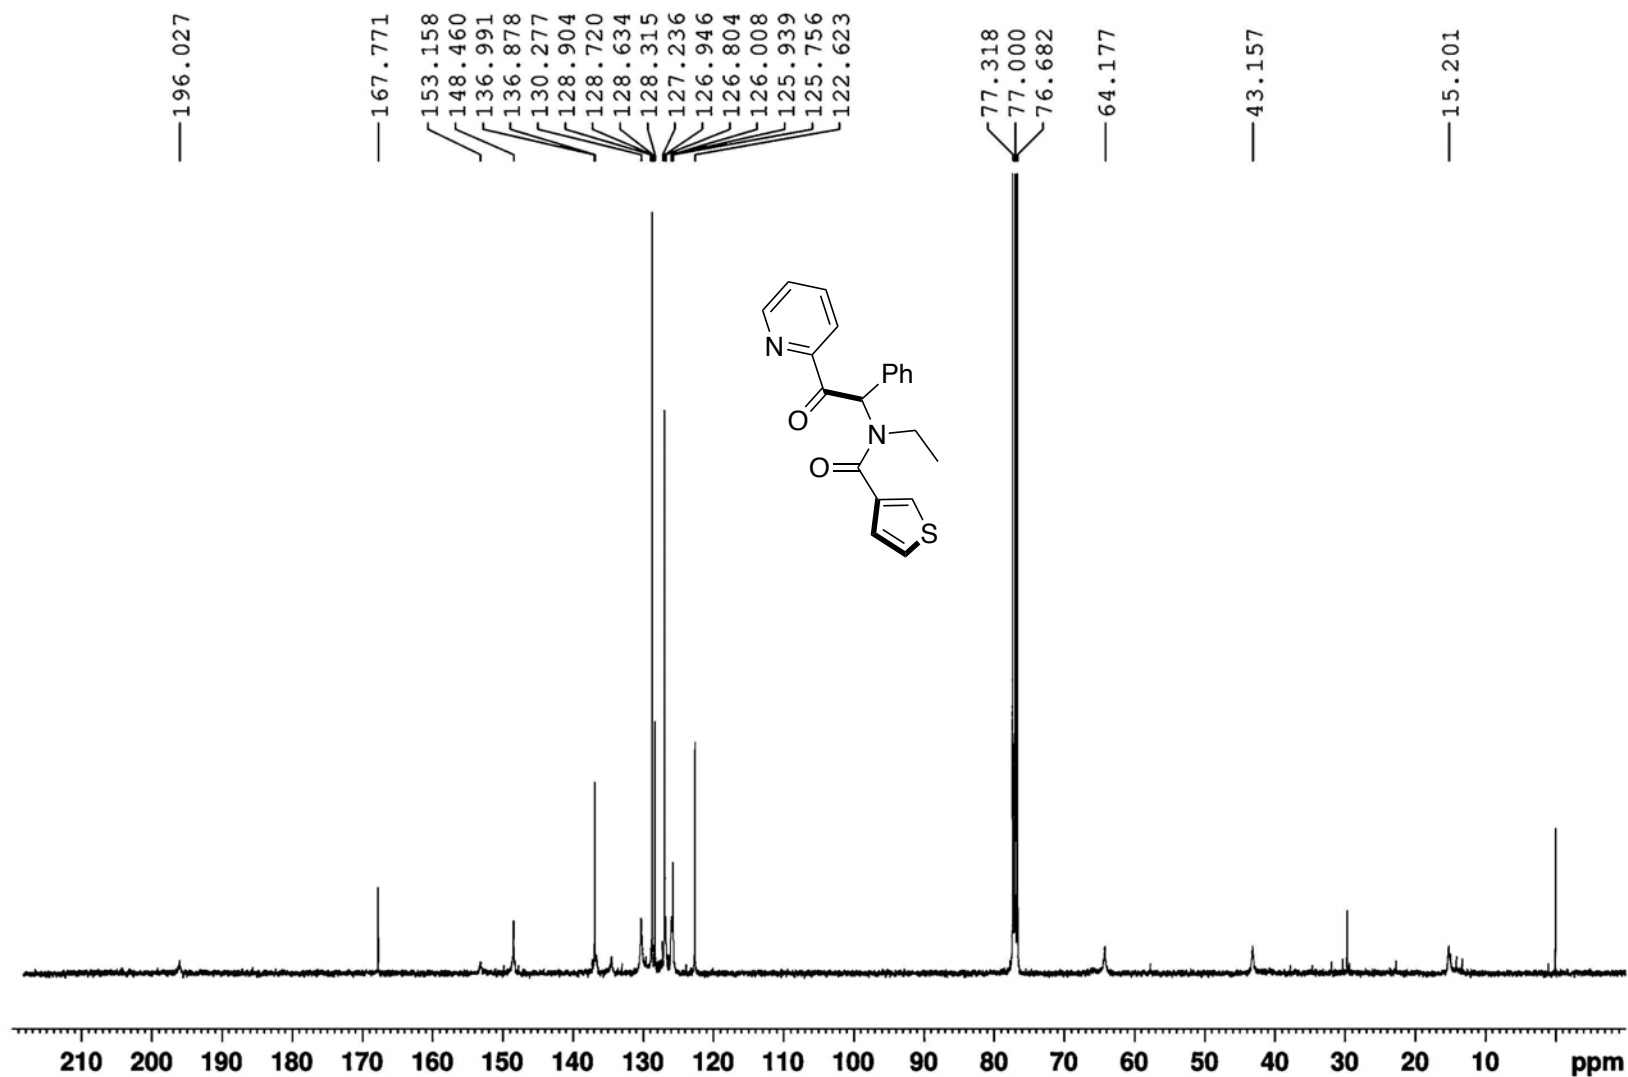

Supplementary Fig. 119 | <sup>13</sup>C NMR spectrum of 8mg-minor



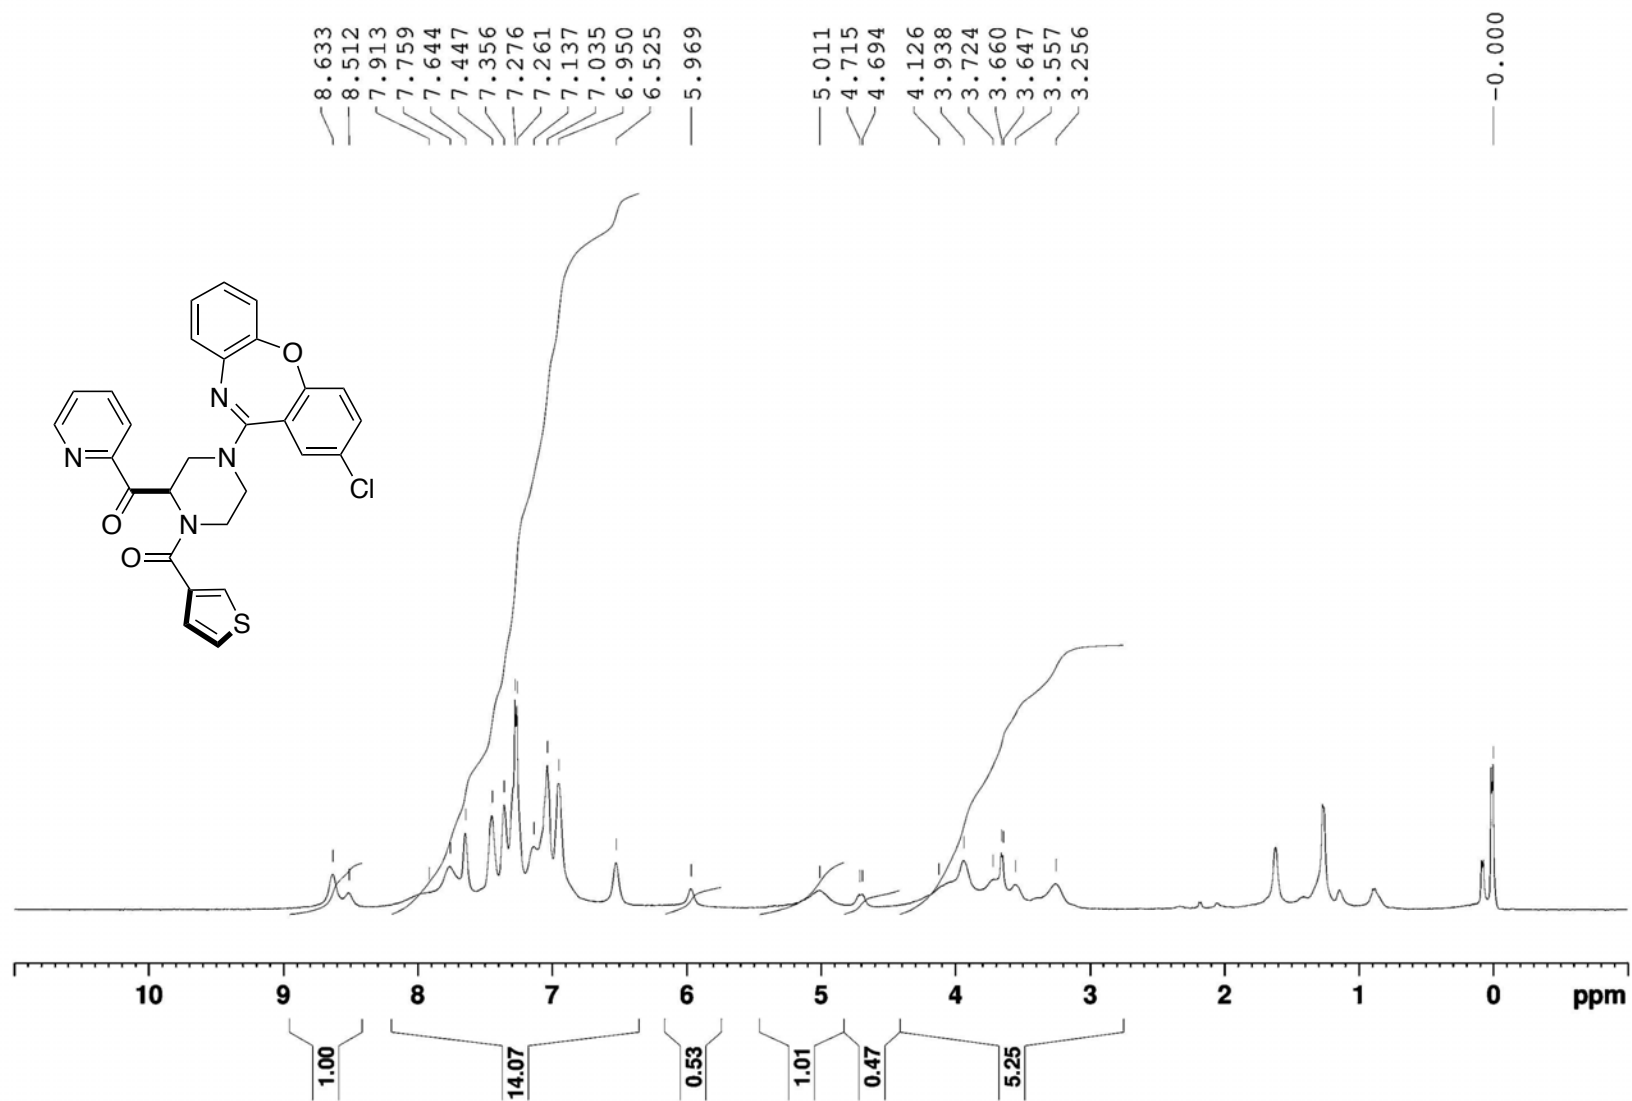

Supplementary Fig. 120 | <sup>1</sup>H NMR spectrum of **8mh**

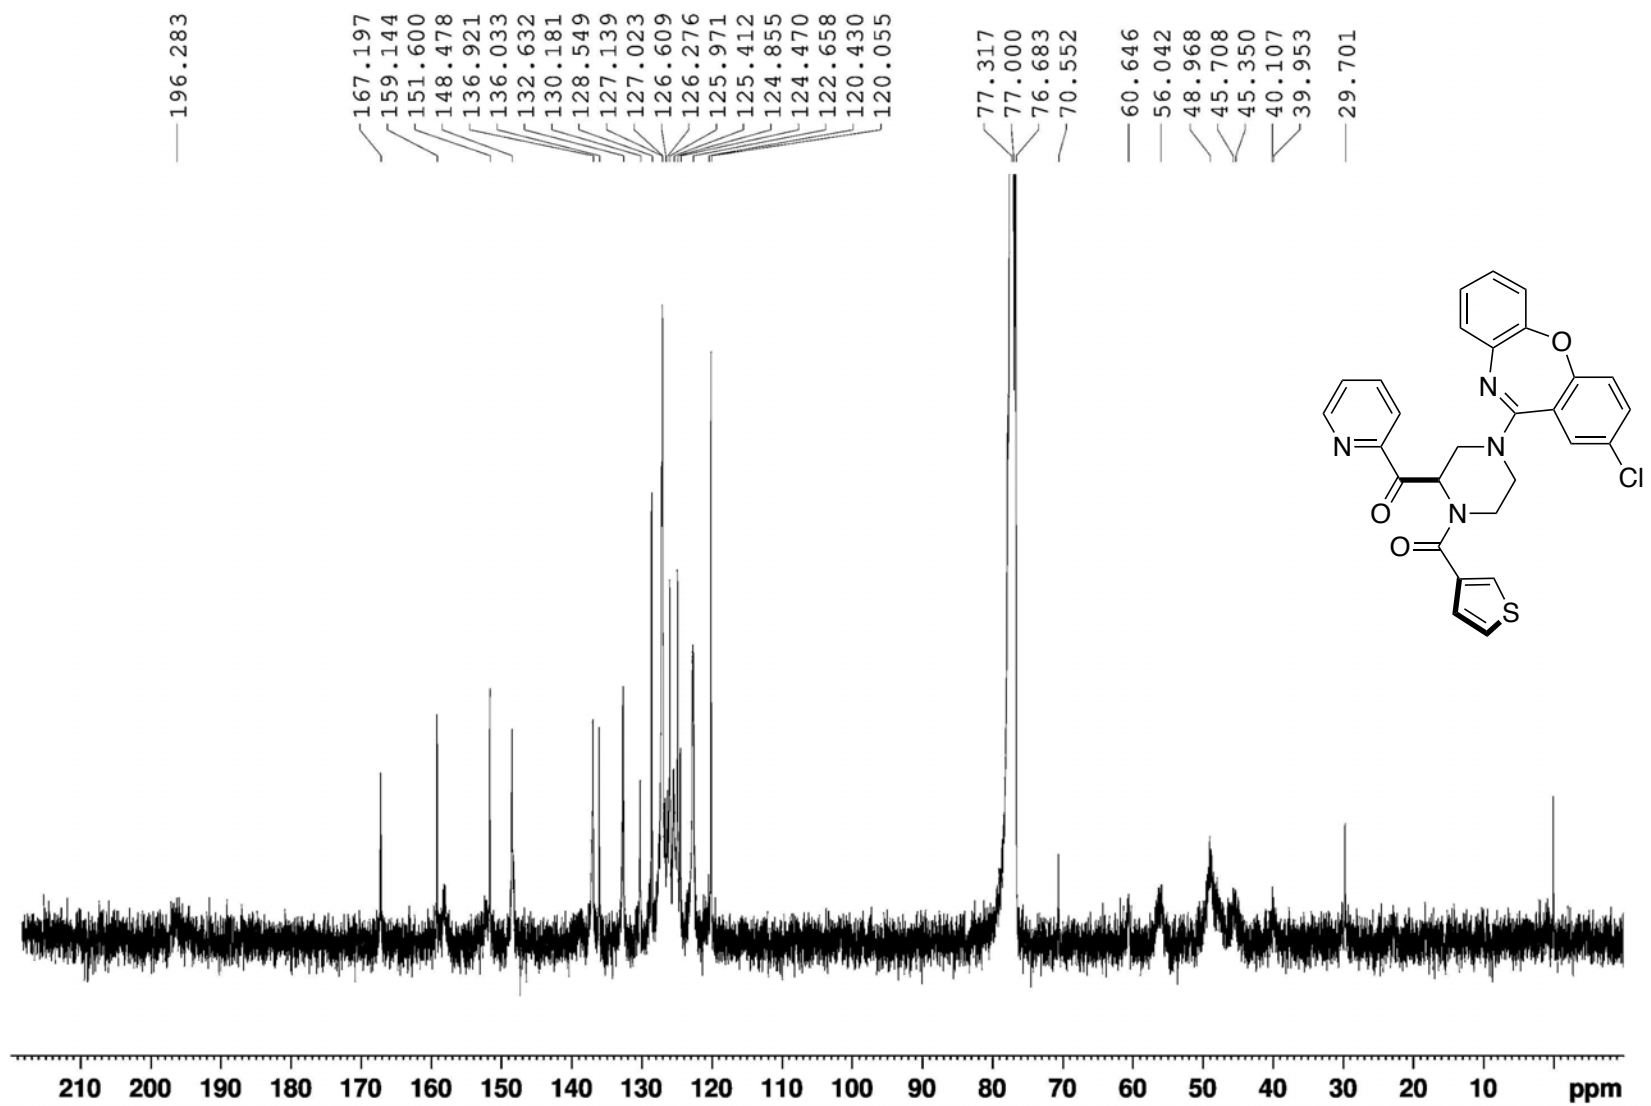

Supplementary Fig. 121 | <sup>13</sup>C NMR spectrum of 8mh

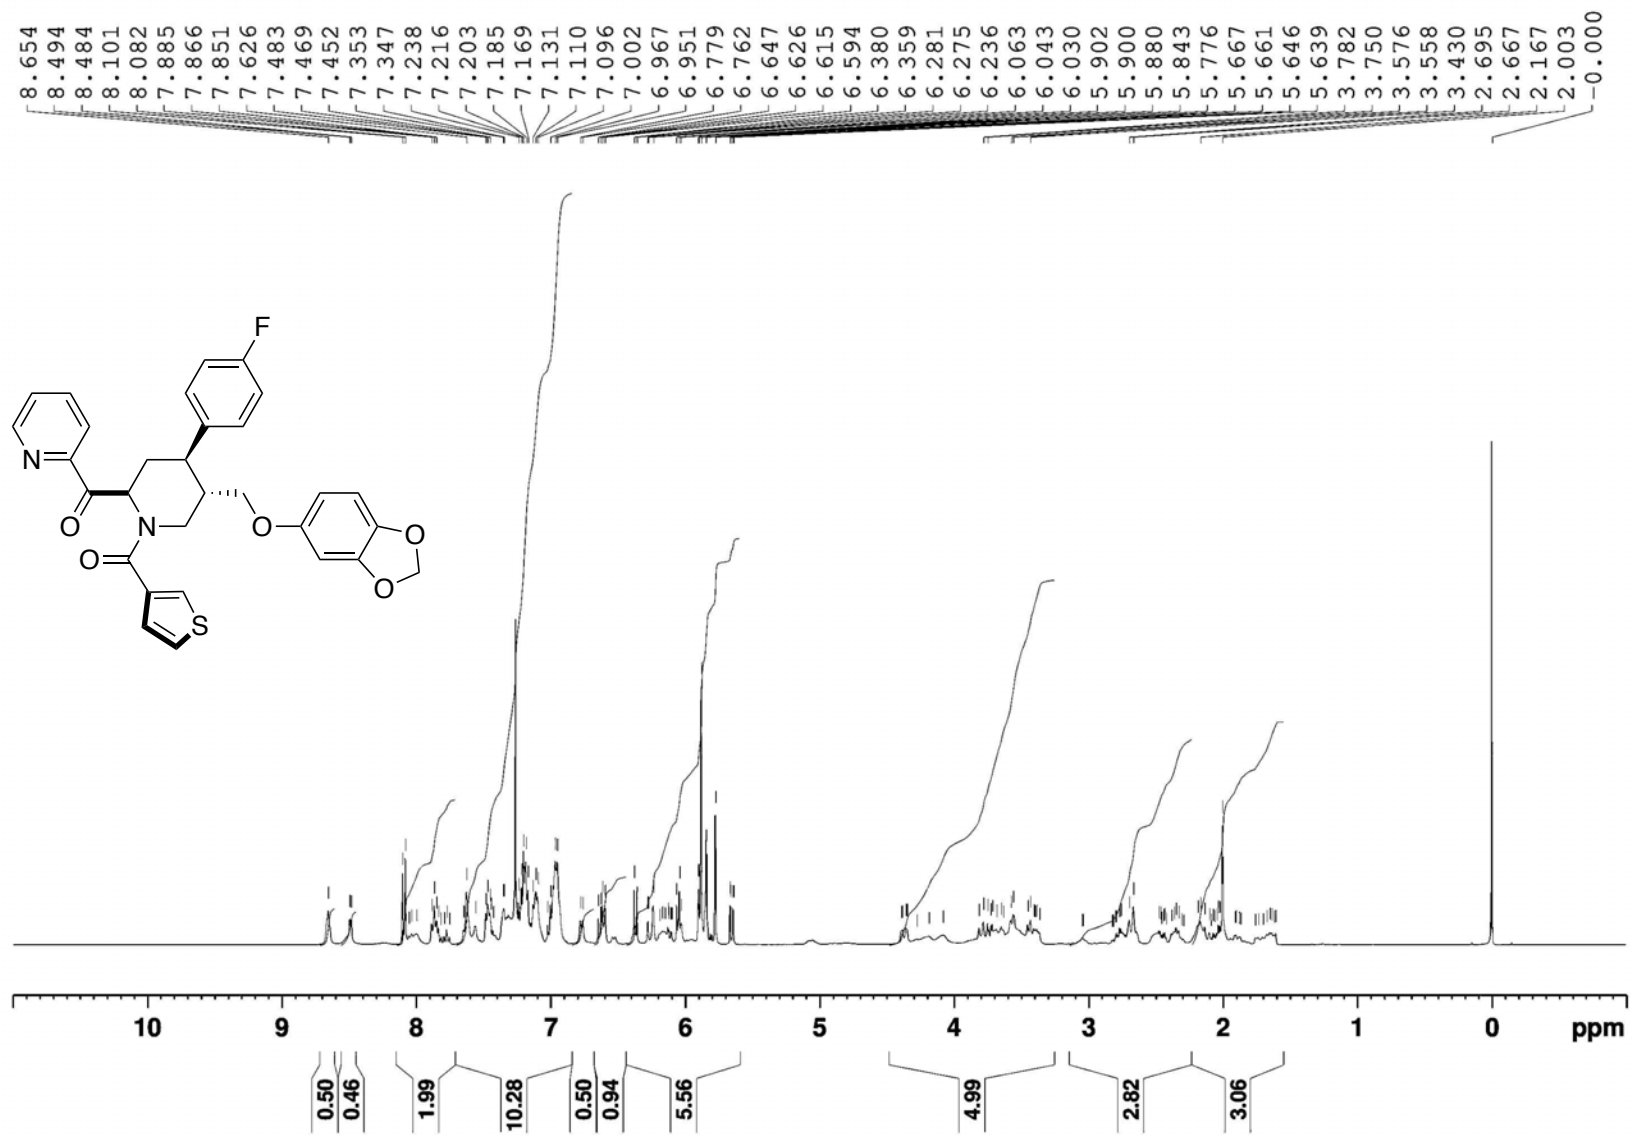

Supplementary Fig. 122 | <sup>1</sup>H NMR spectrum of 8mi

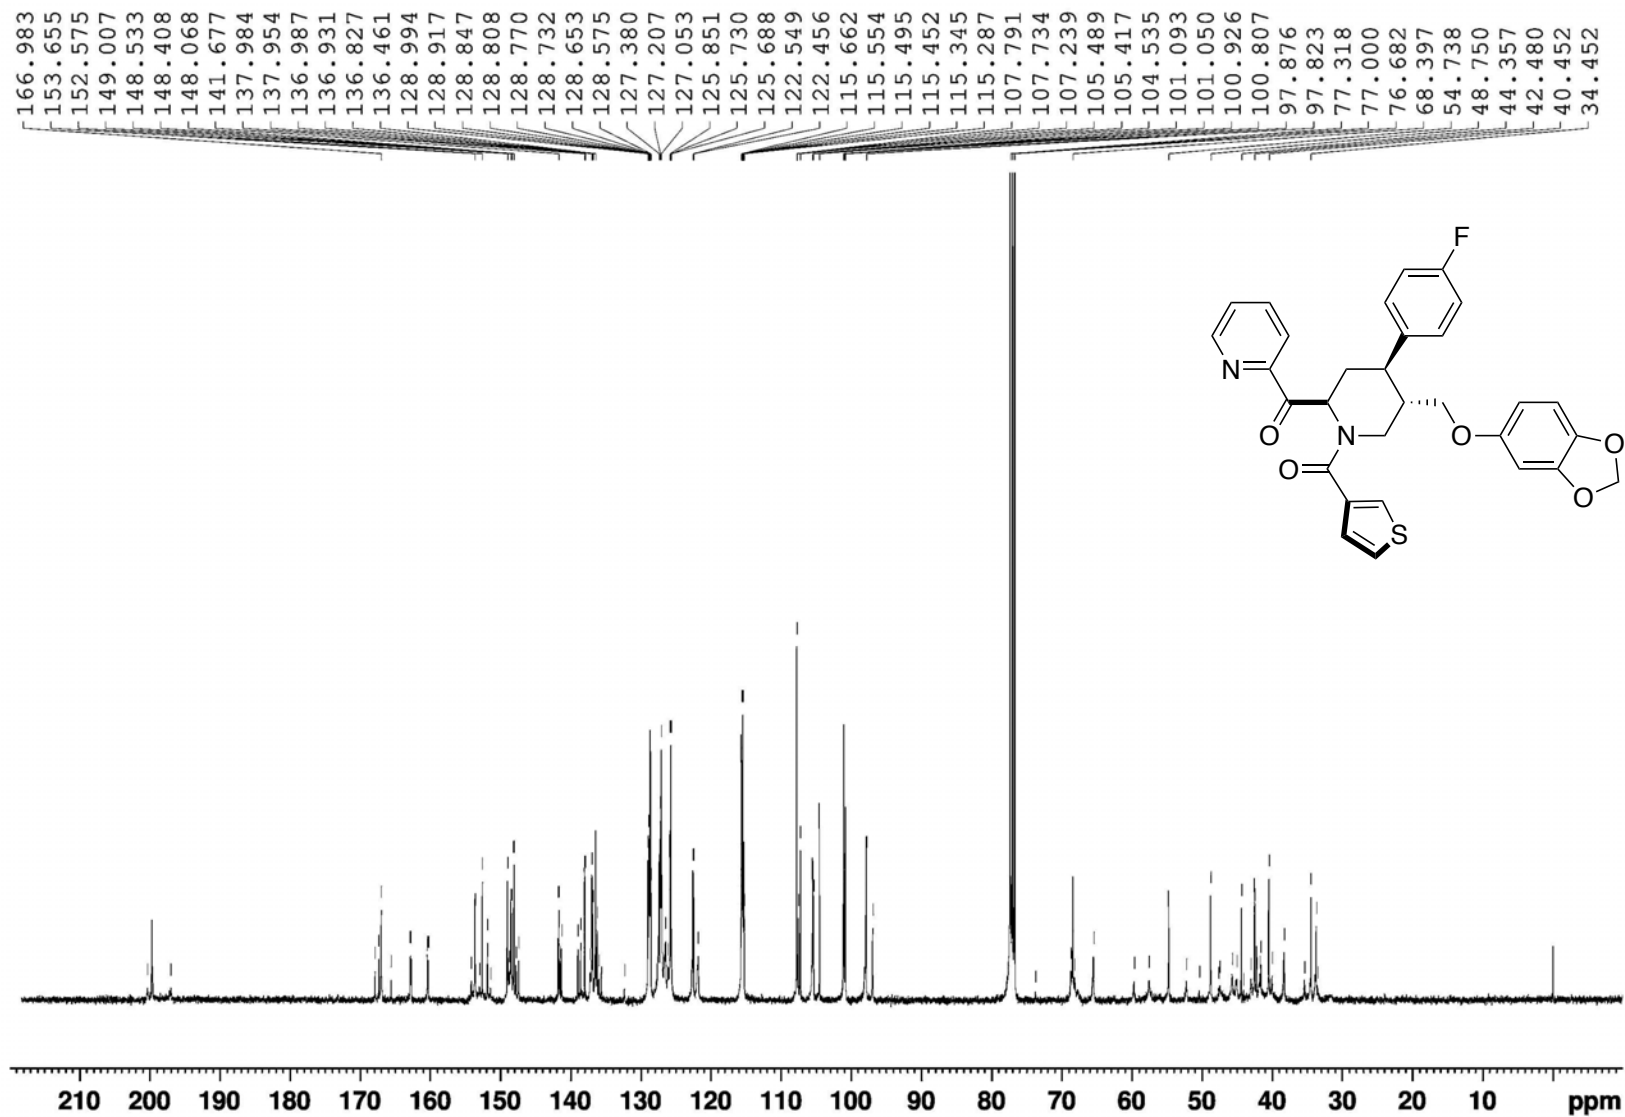

Supplementary Fig. 123 |  $^{13}\text{C}$  NMR spectrum of **8mi** (whole)

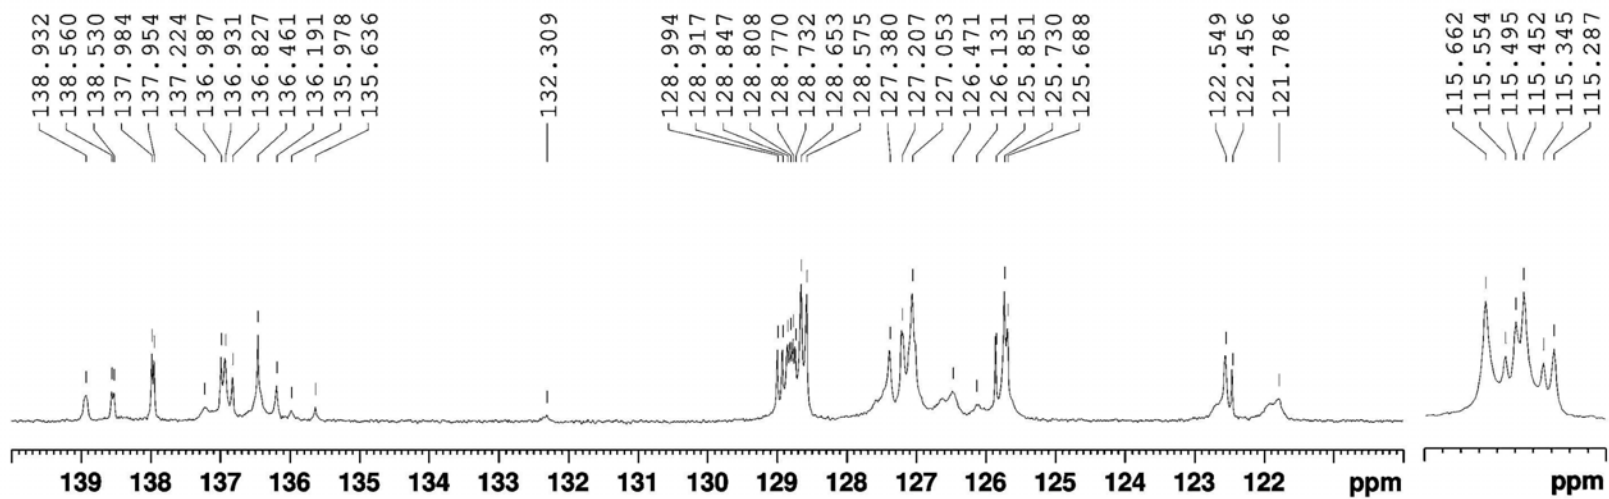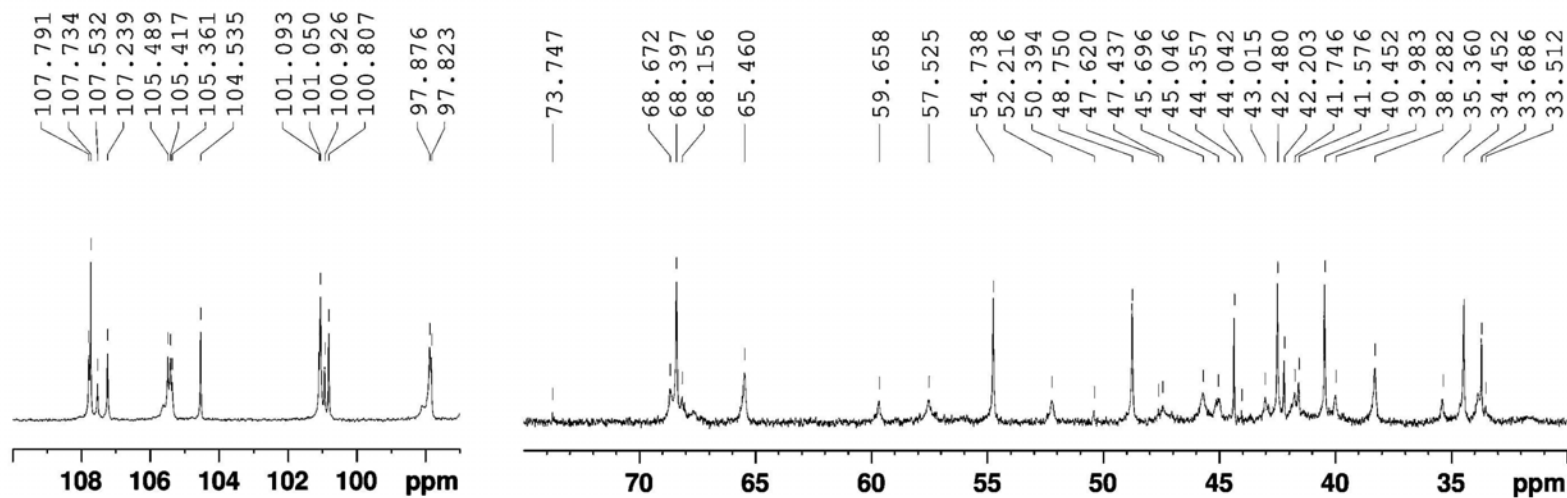

Supplementary Fig. 124 |  $^{13}\text{C}$  NMR spectrum of 8mi

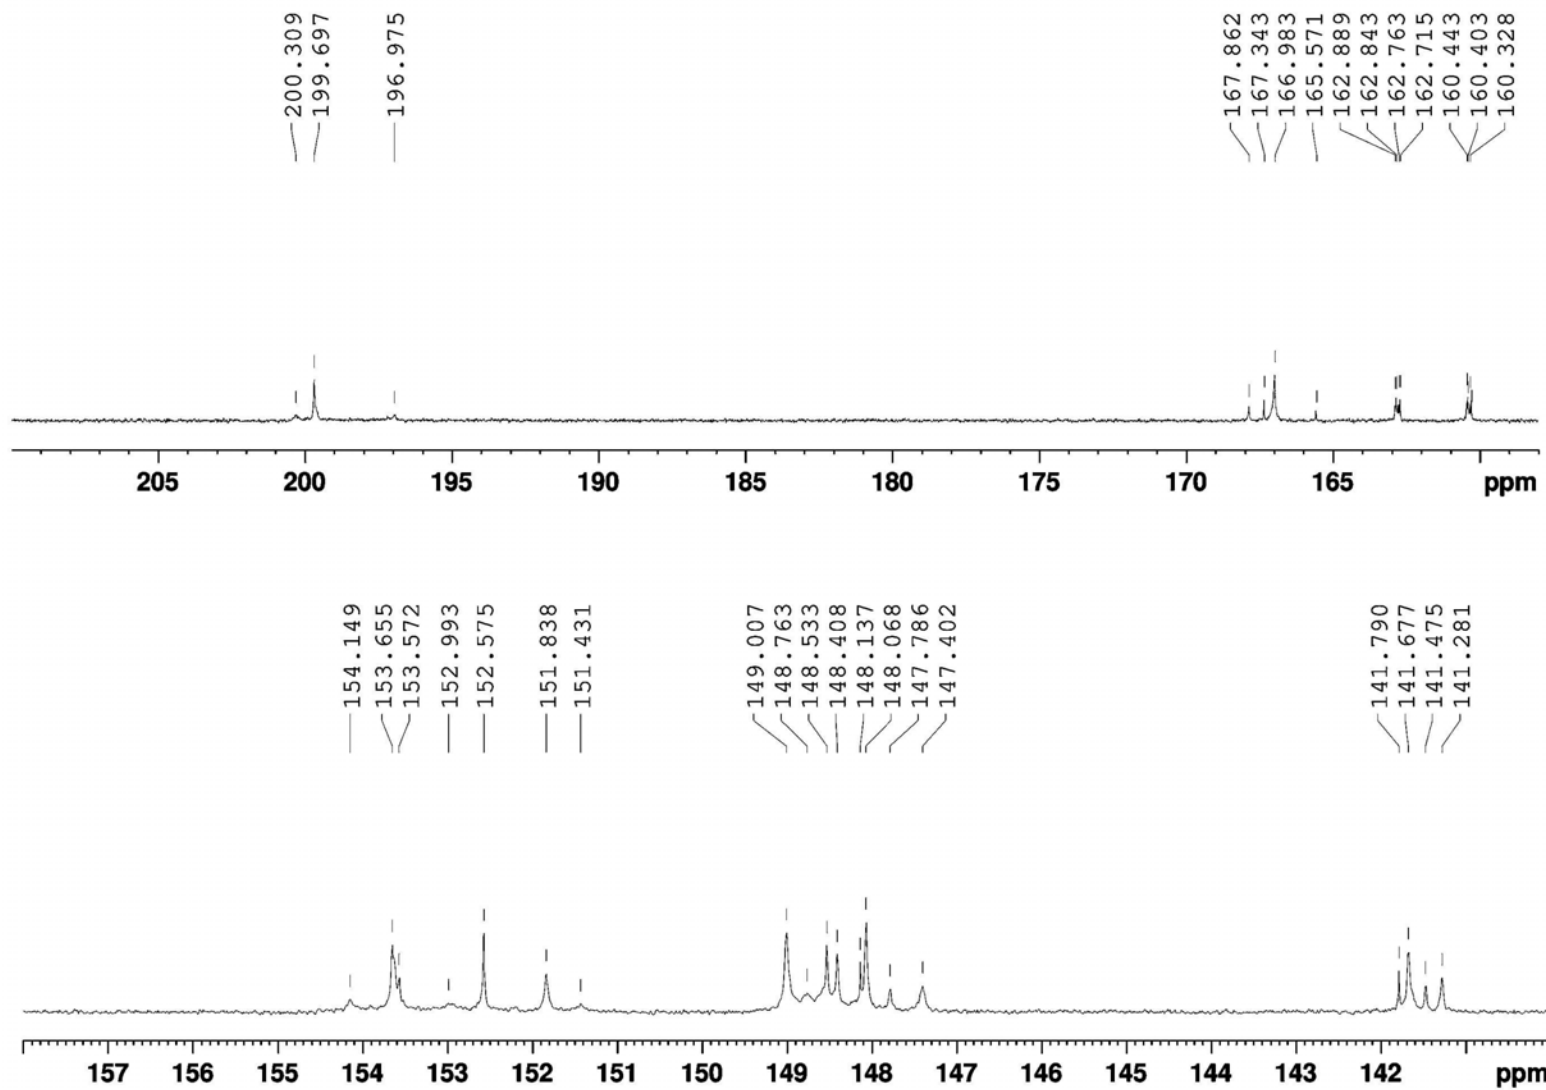

Supplementary Fig. 125 |  $^{13}\text{C}$  NMR spectrum of **8mi**

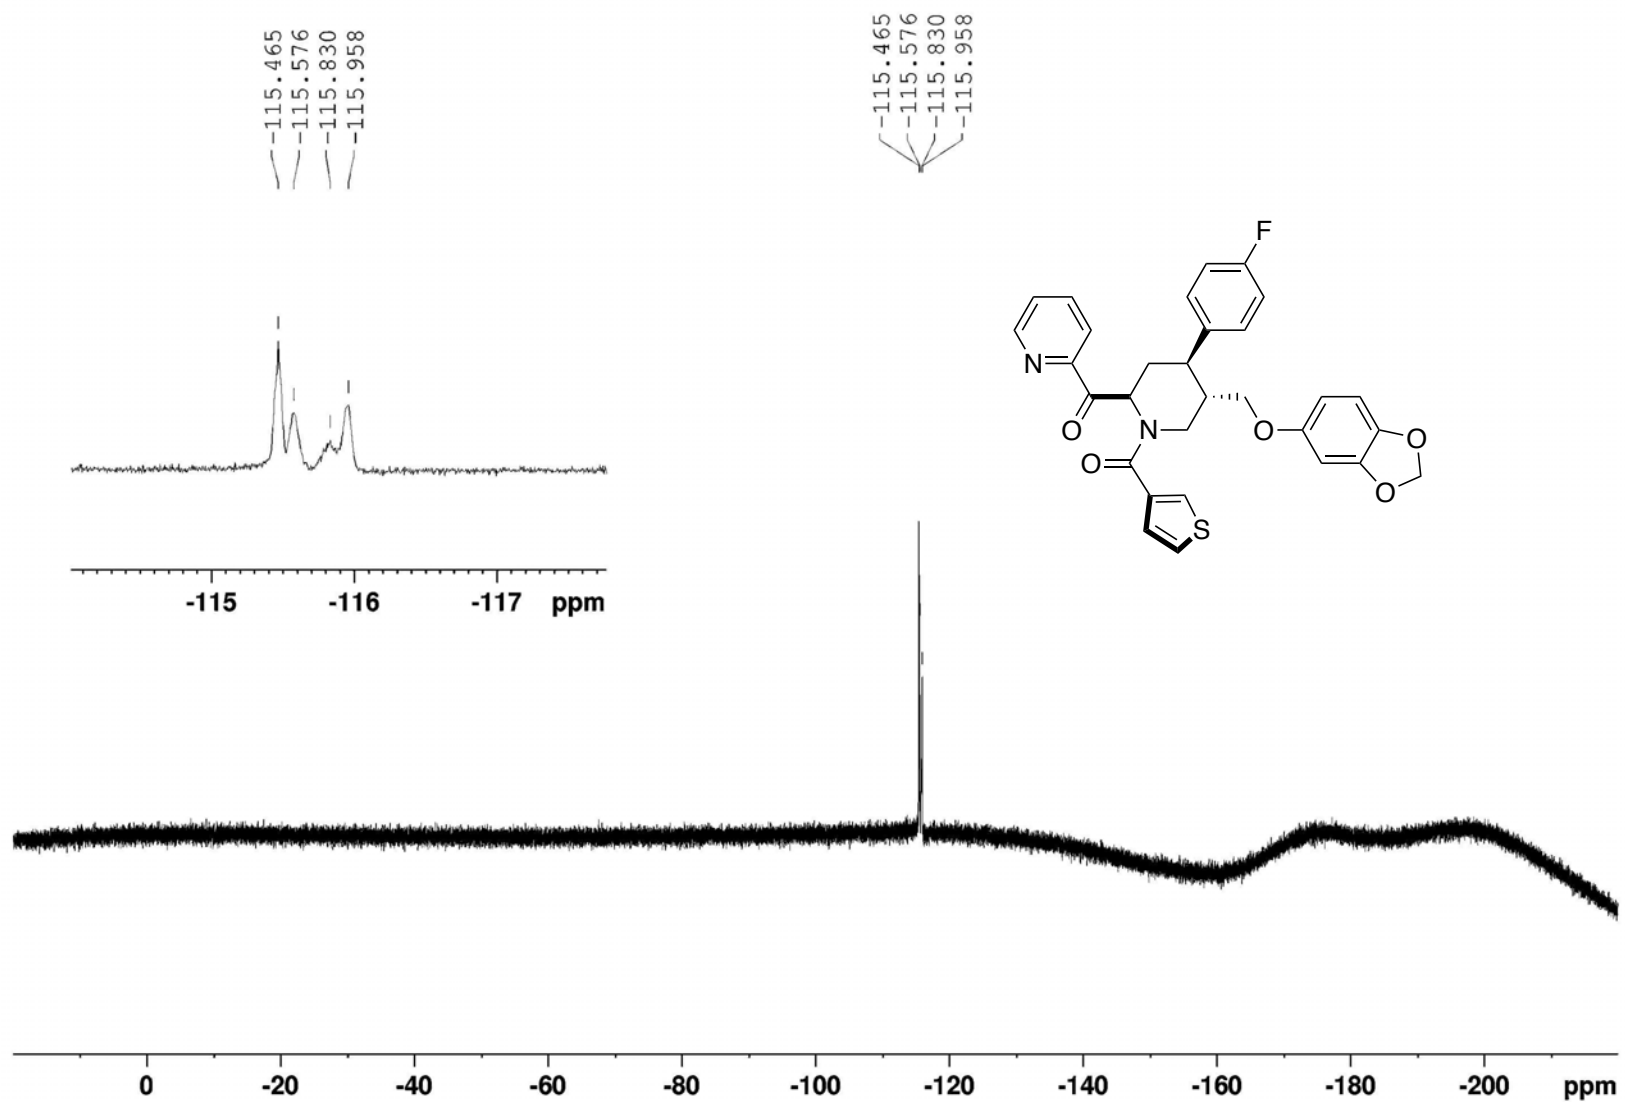

Supplementary Fig. 126 |  $^{19}\text{F}$  NMR spectrum of **8mi**

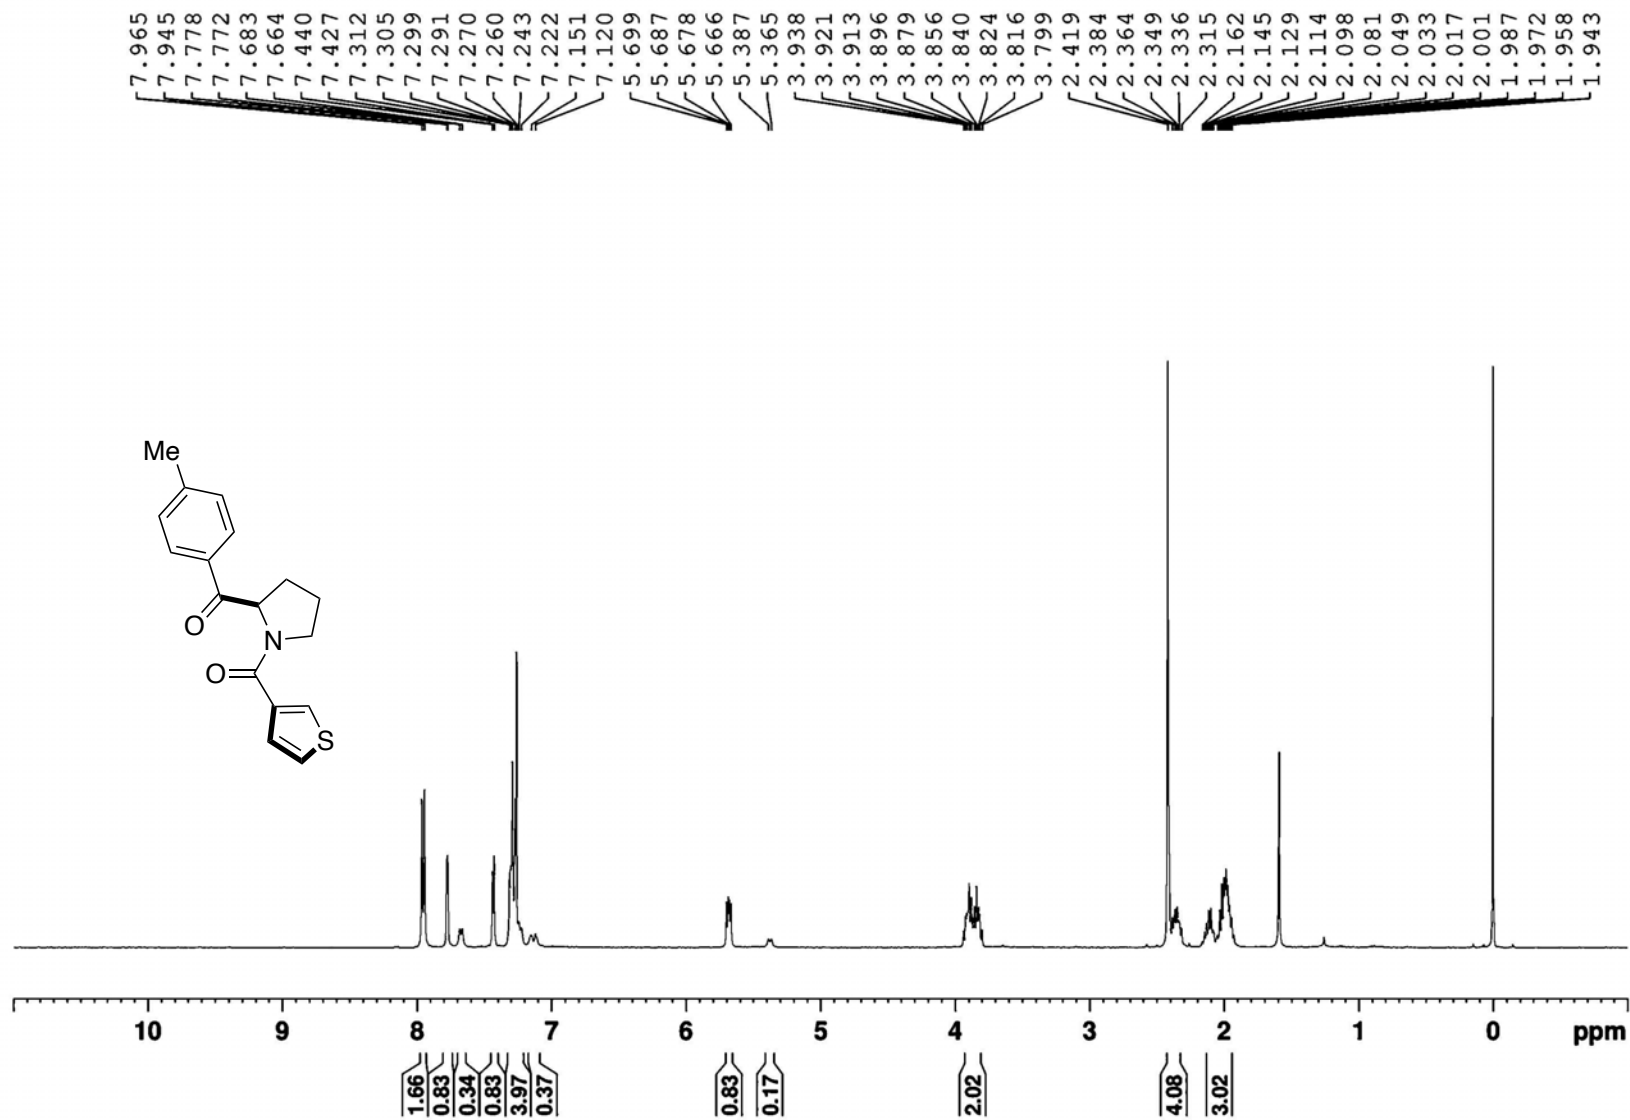

Supplementary Fig. 127 | <sup>1</sup>H NMR spectrum of 8ba



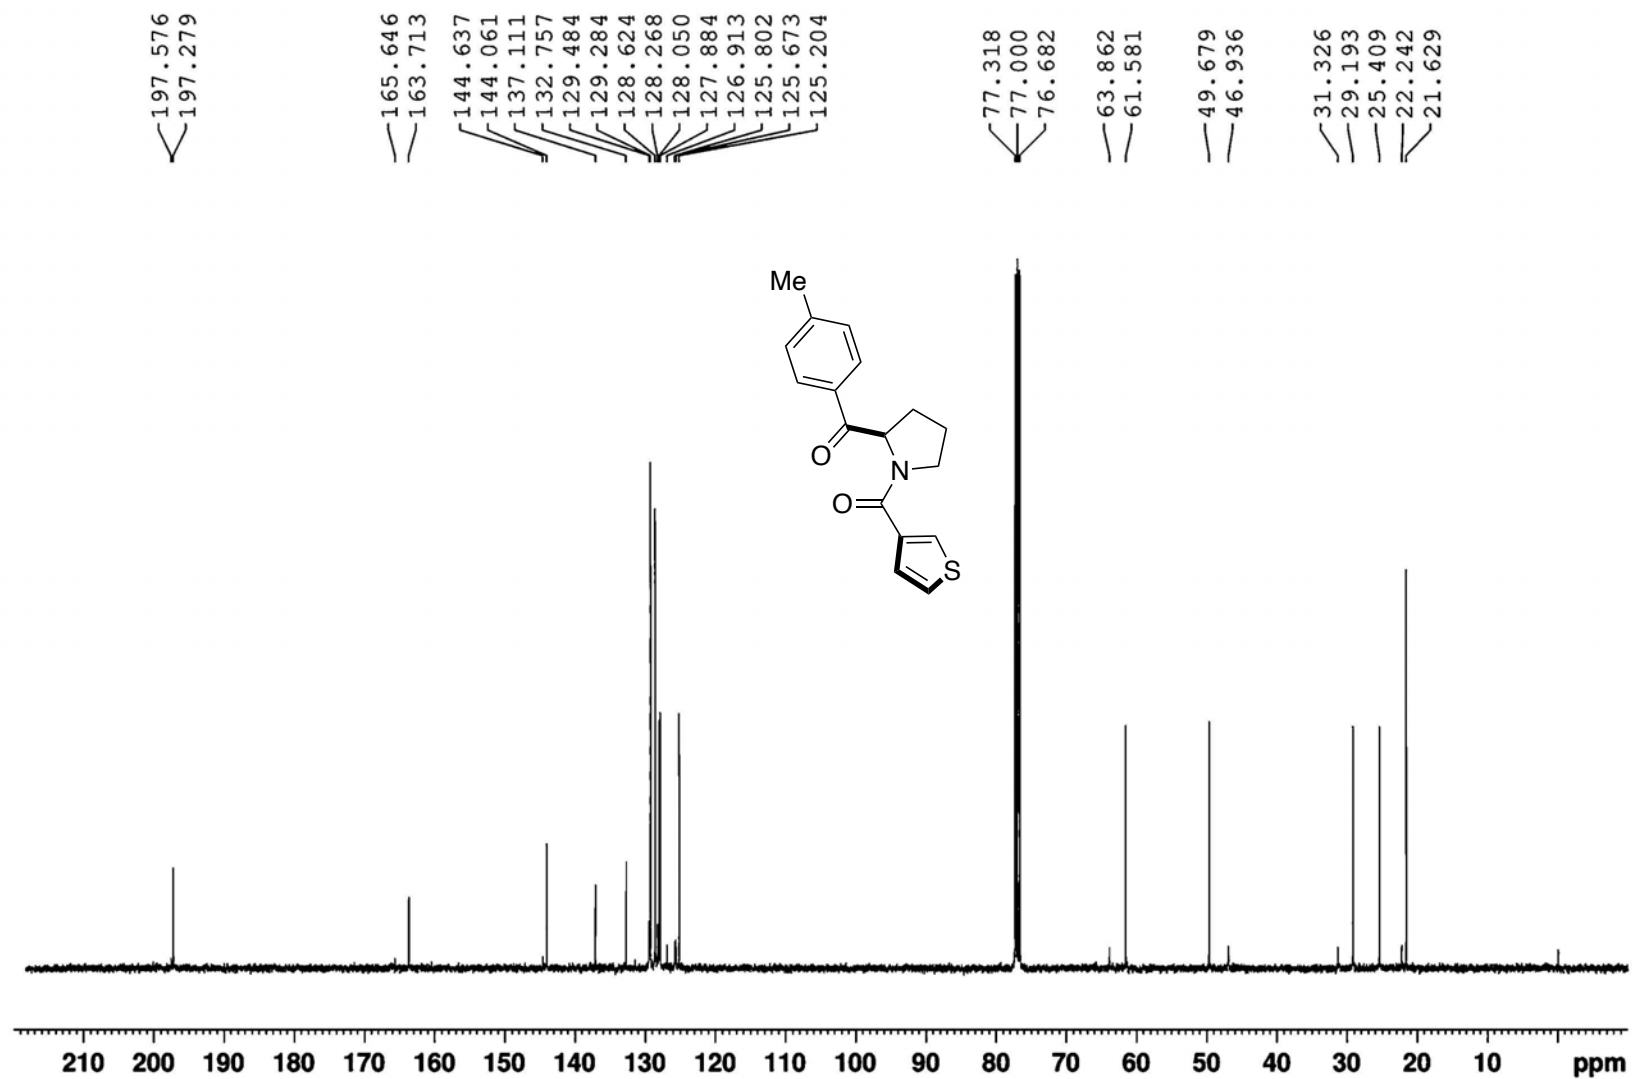

Supplementary Fig. 128 |  $^{13}\text{C}$  NMR spectrum of **8ba**

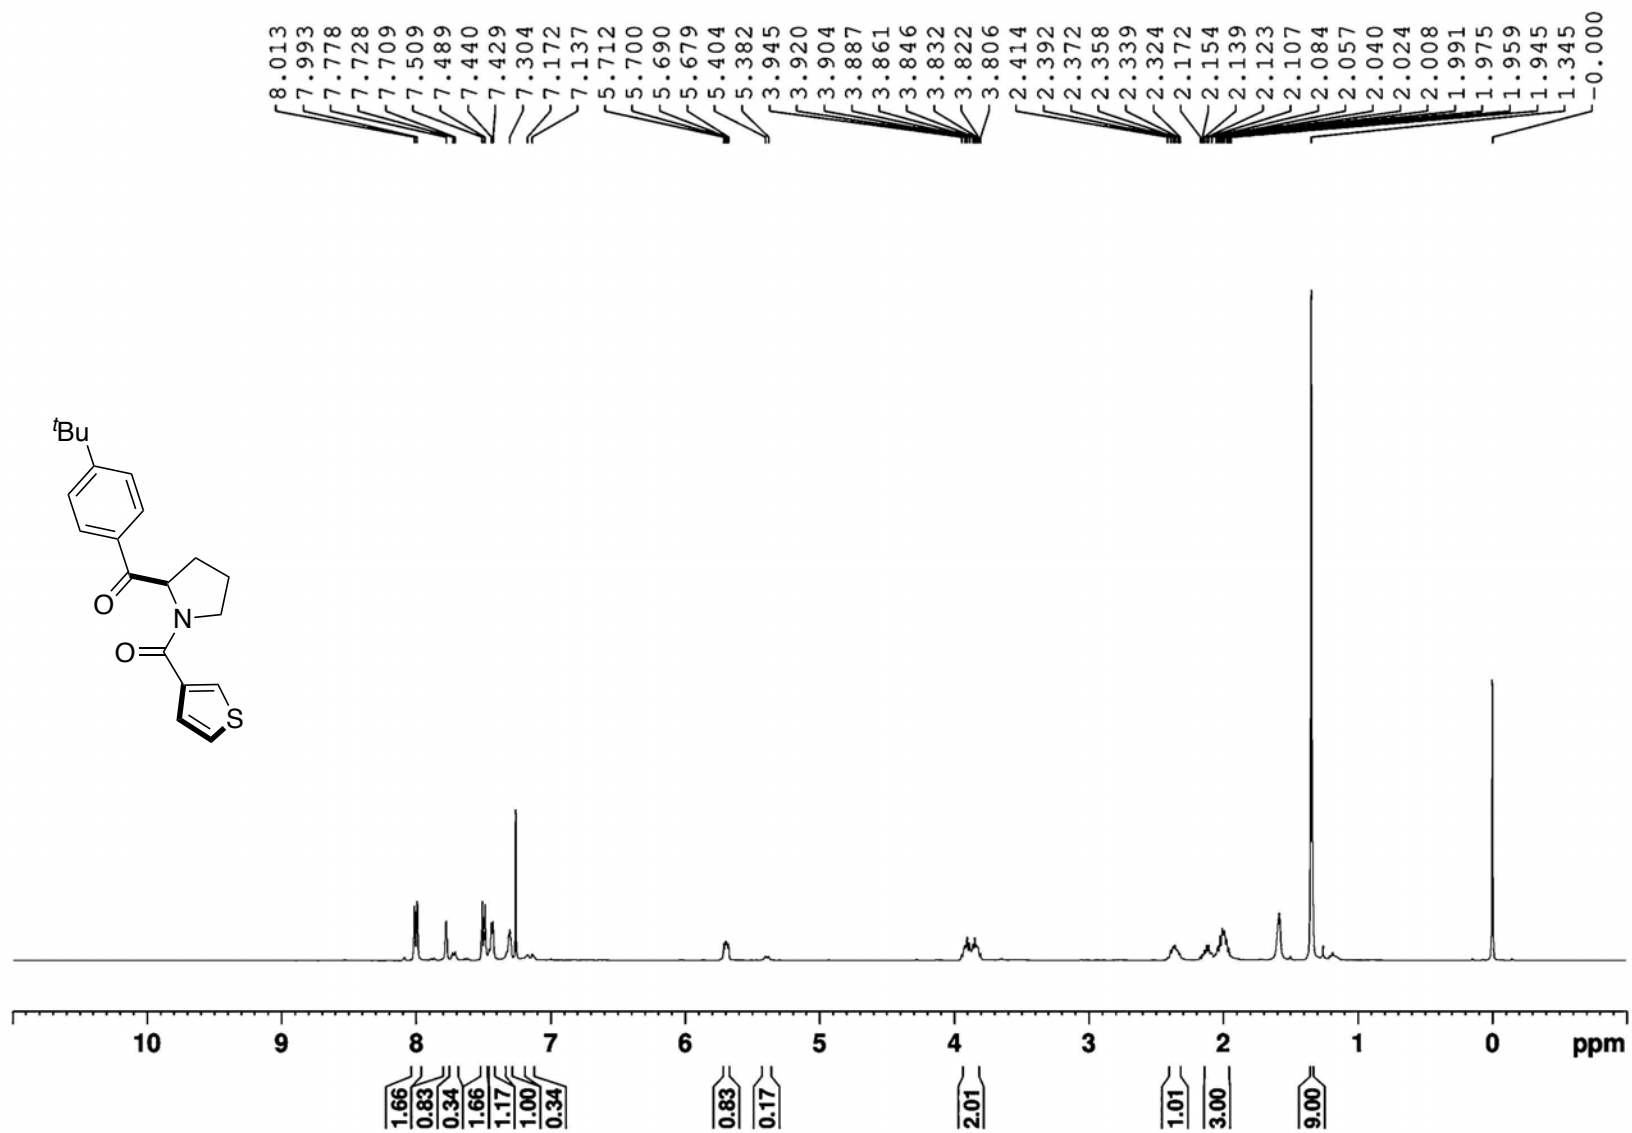

Supplementary Fig. 129 | <sup>1</sup>H NMR spectrum of **8ca**

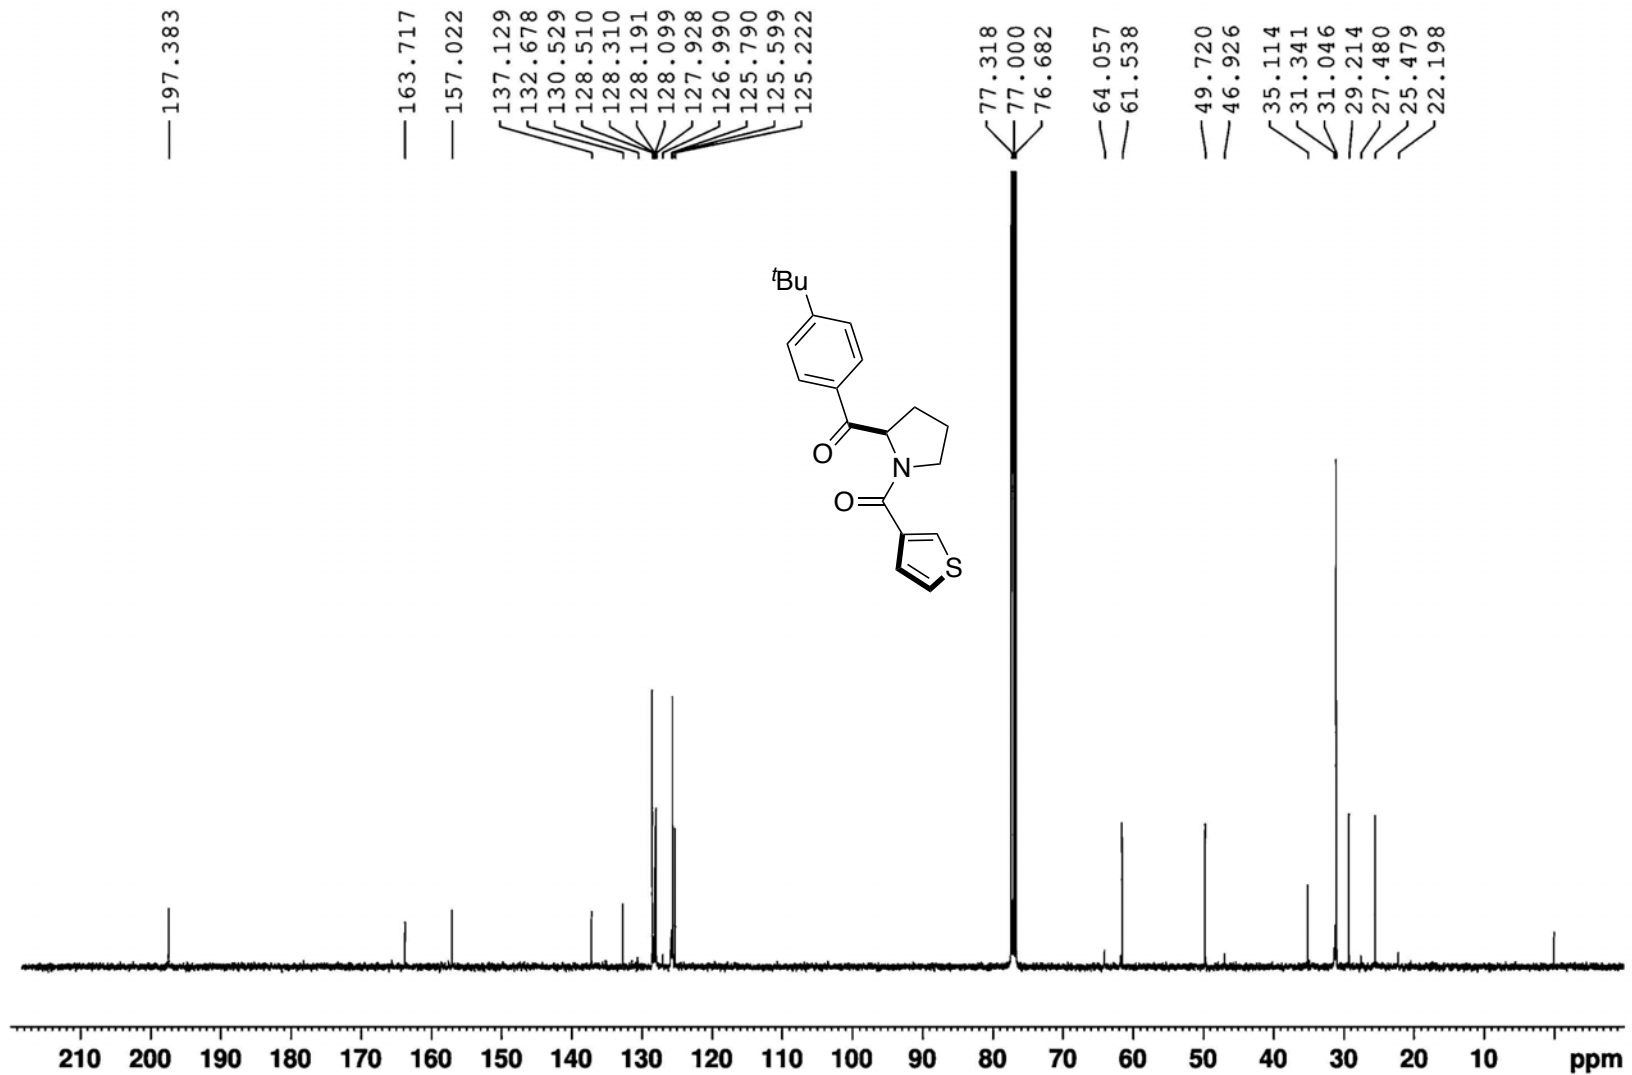

Supplementary Fig. 130 |  $^{13}\text{C}$  NMR spectrum of 8ca

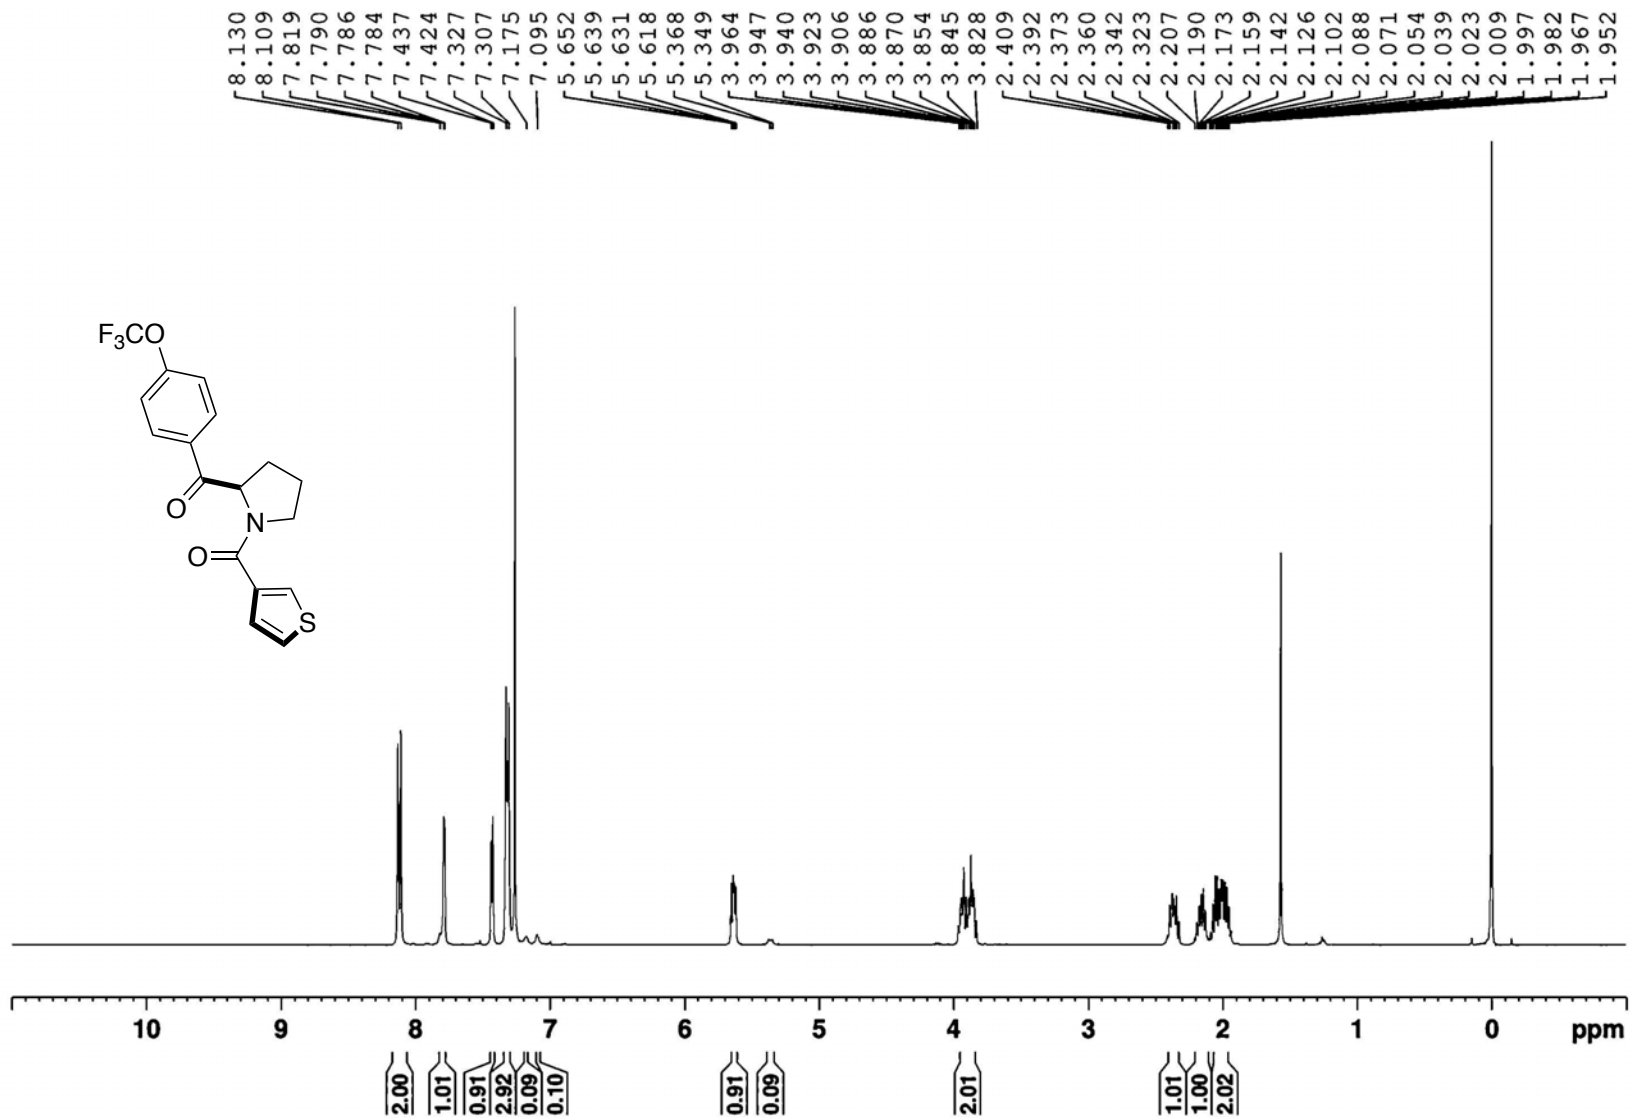

Supplementary Fig. 131 | <sup>1</sup>H NMR spectrum of 8fa

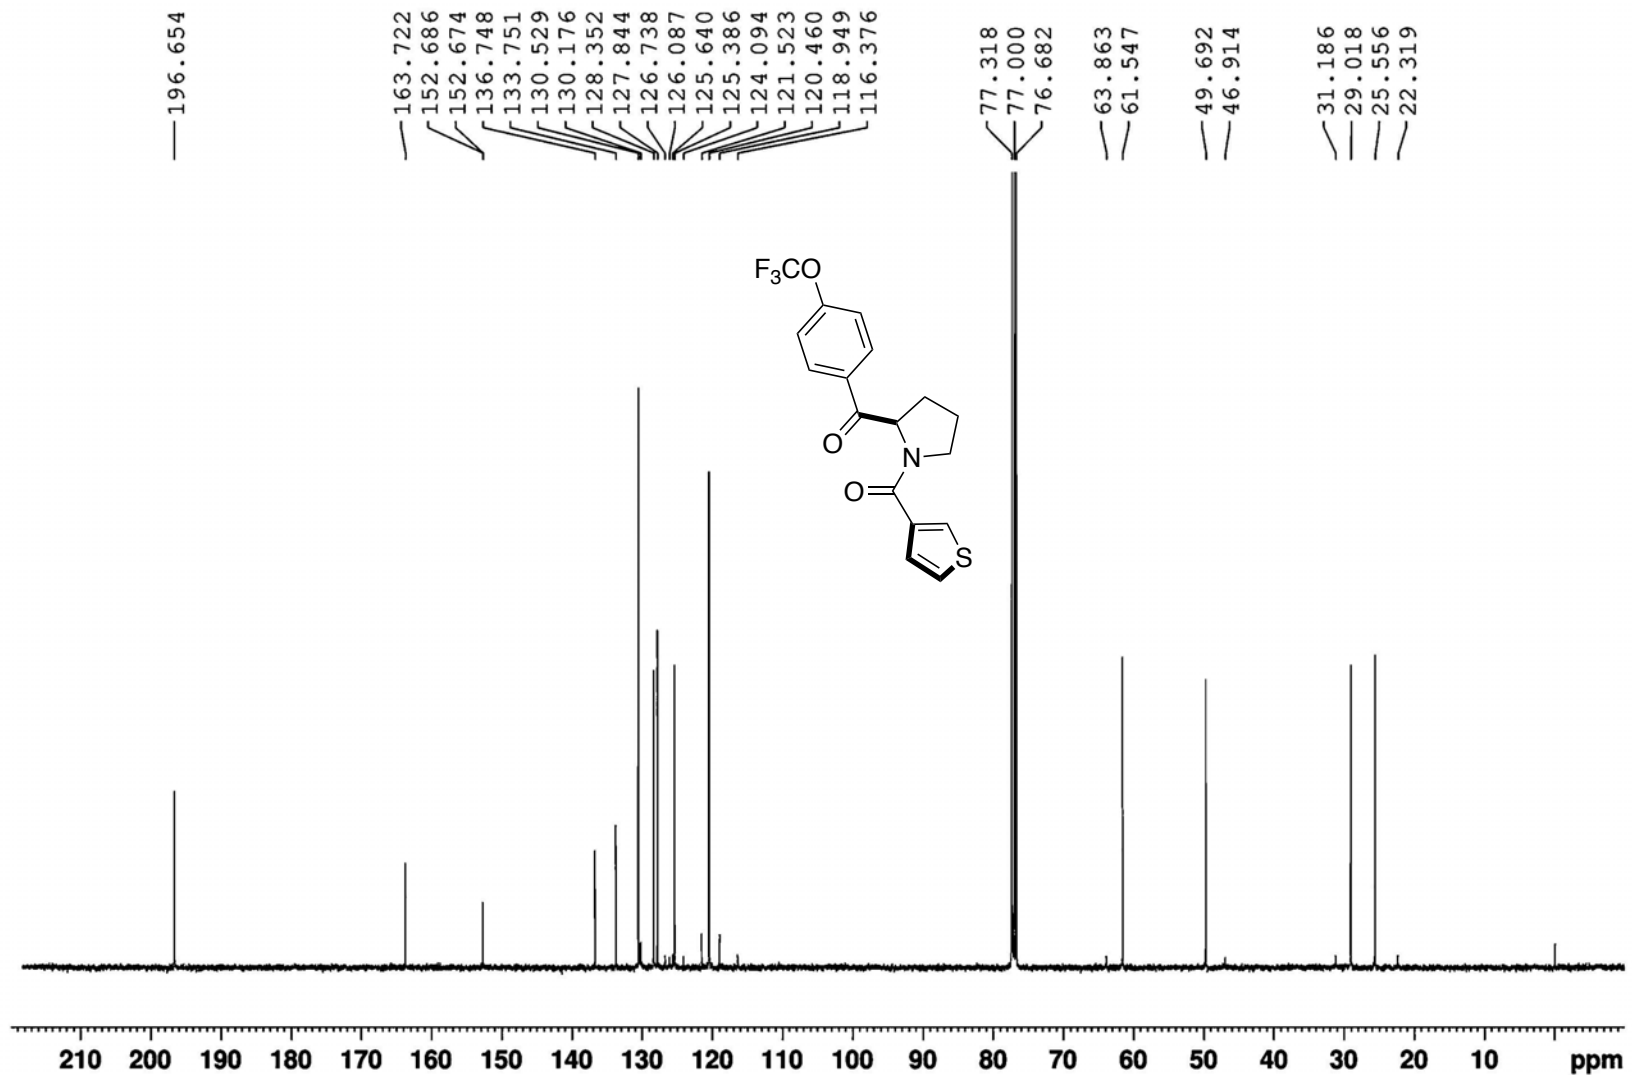

Supplementary Fig. 132 |  $^{13}\text{C}$  NMR spectrum of 8fa

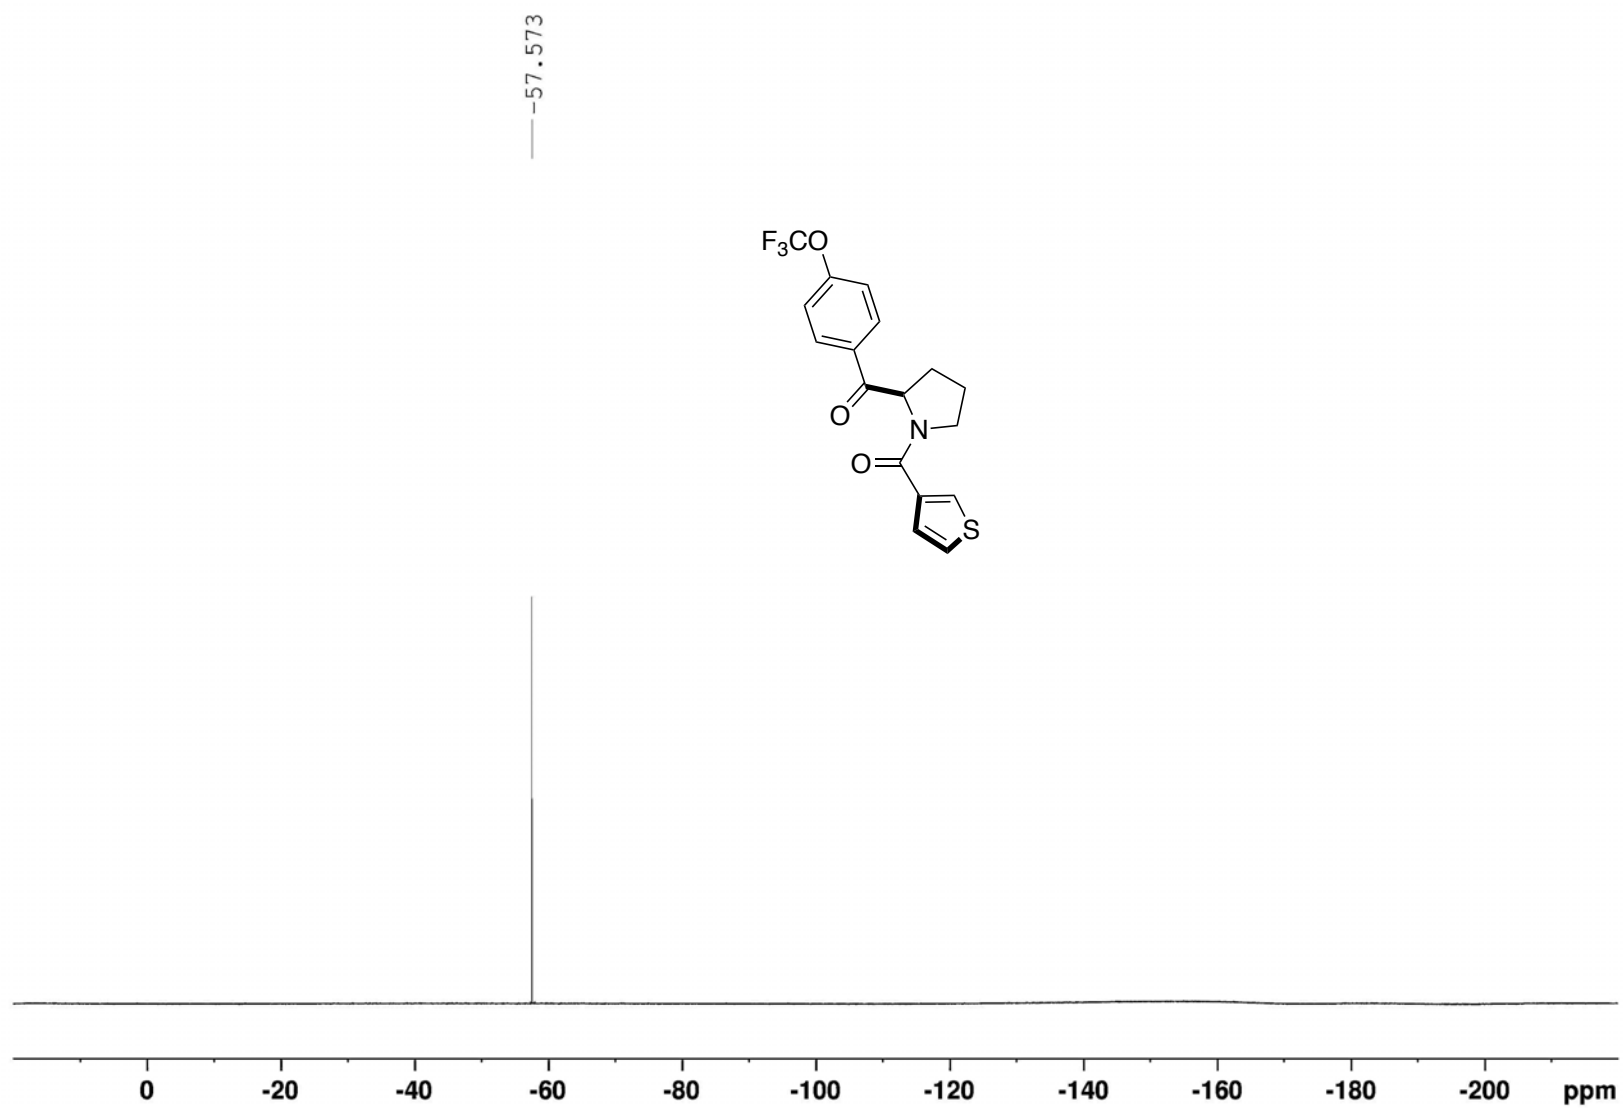

Supplementary Fig. 133 |  $^{19}\text{F}$  NMR spectrum of **8fa**

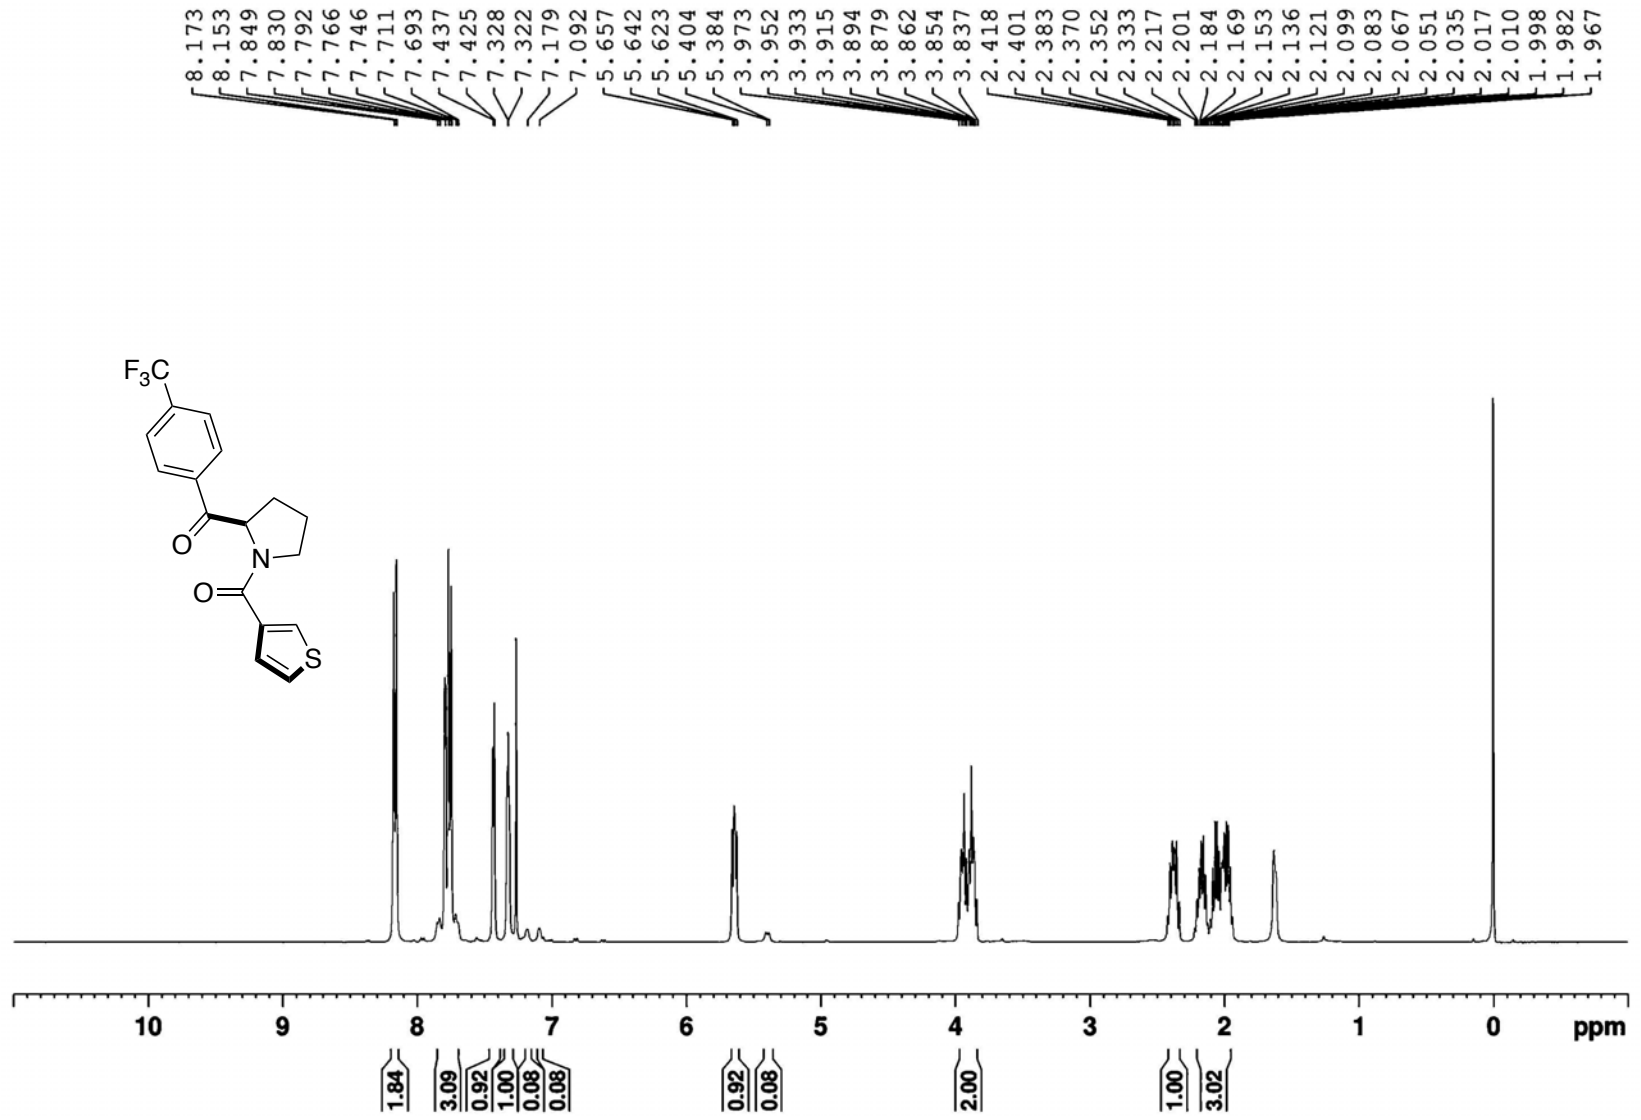

Supplementary Fig. 134 | <sup>1</sup>H NMR spectrum of 8ga

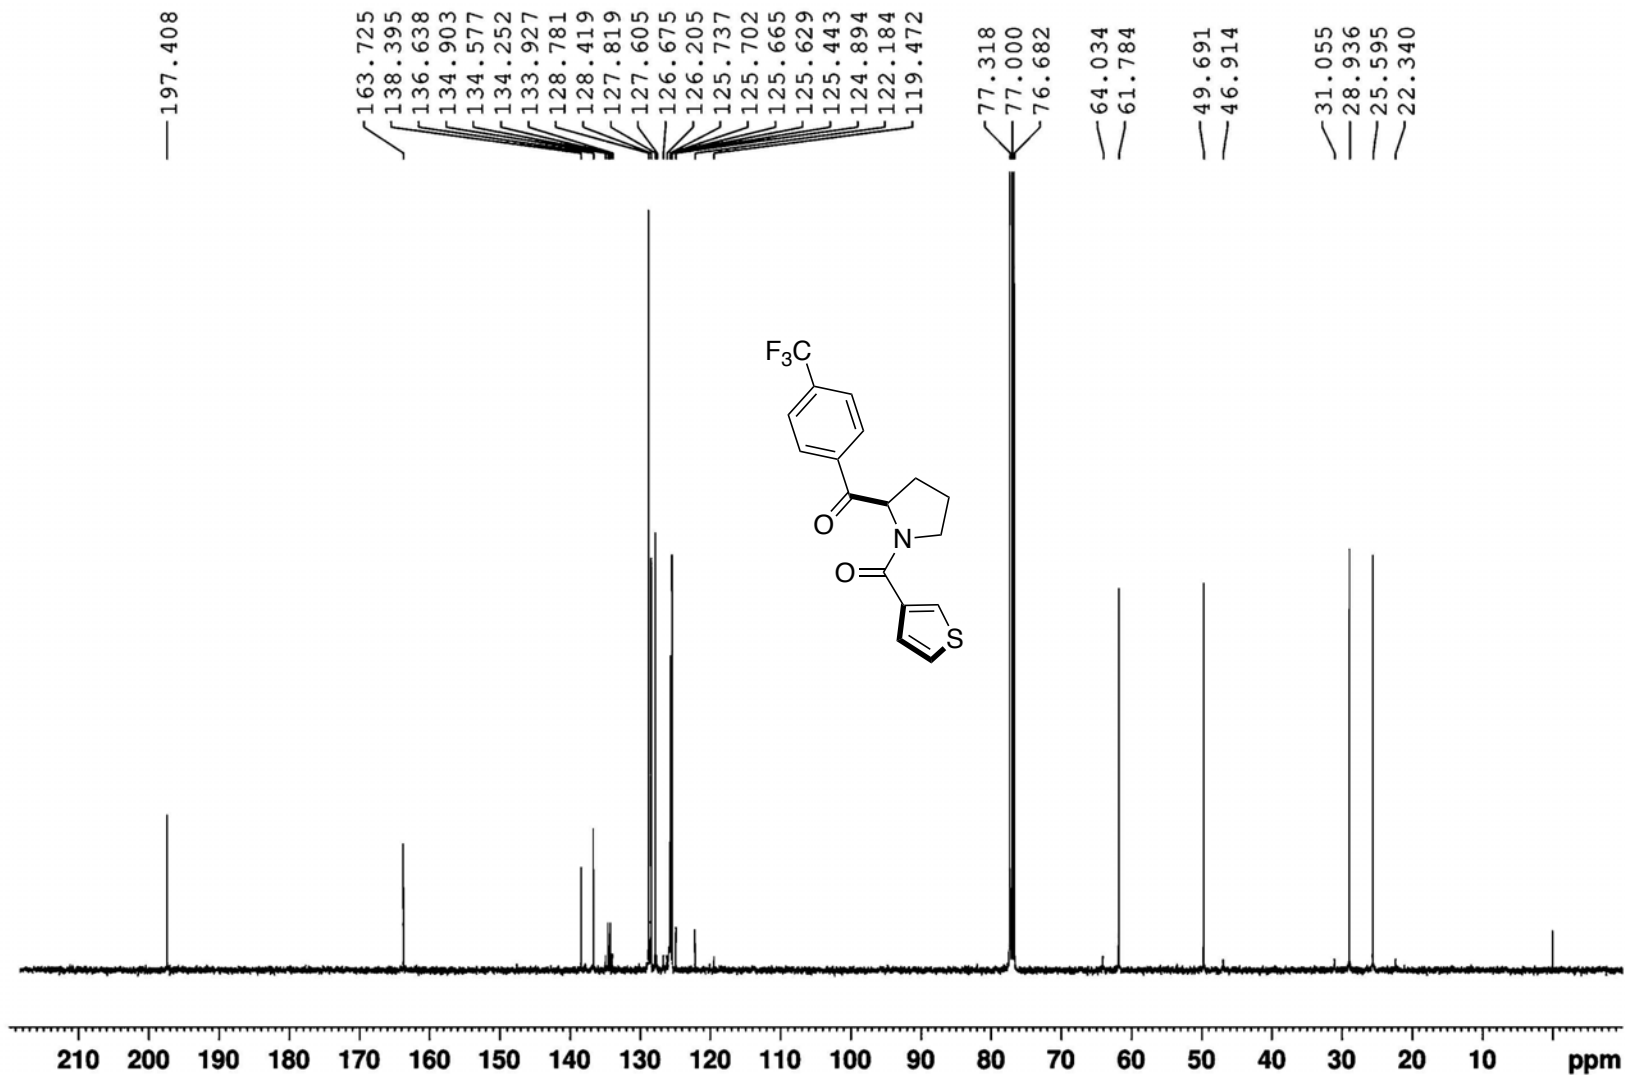

Supplementary Fig. 135 |  $^{13}\text{C}$  NMR spectrum of 8ga



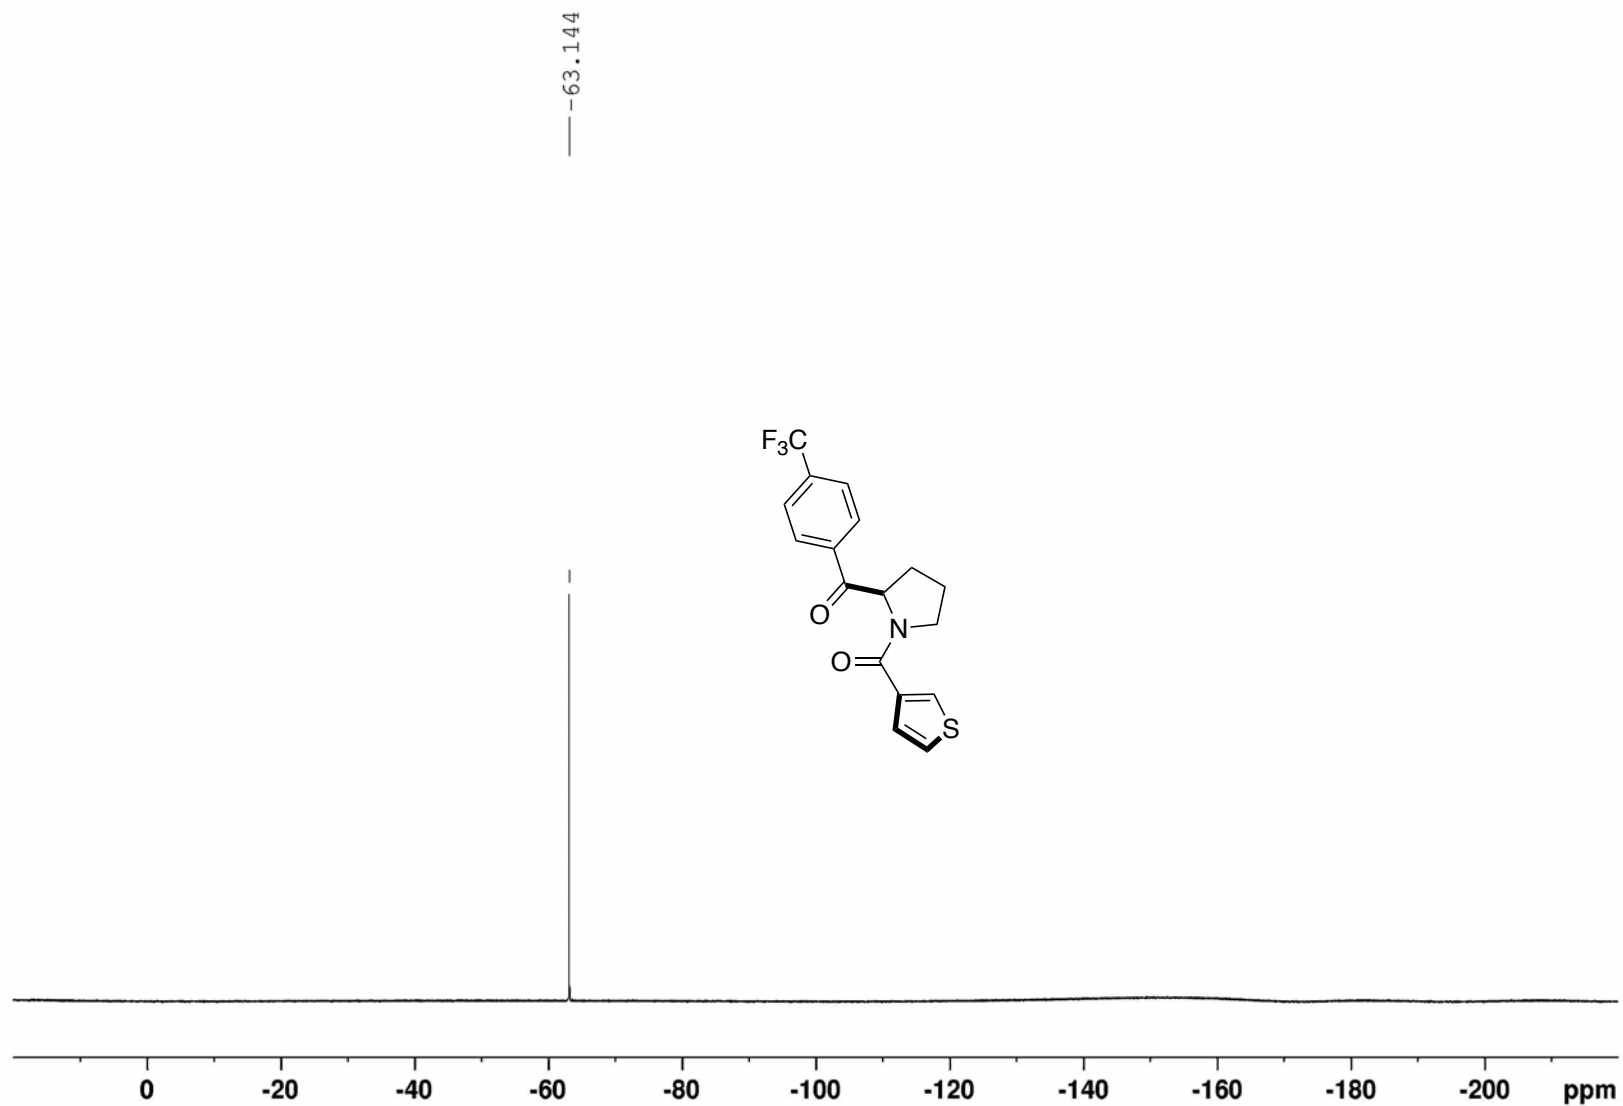

Supplementary Fig. 136 |  $^{19}\text{F}$  NMR spectrum of **8ga**

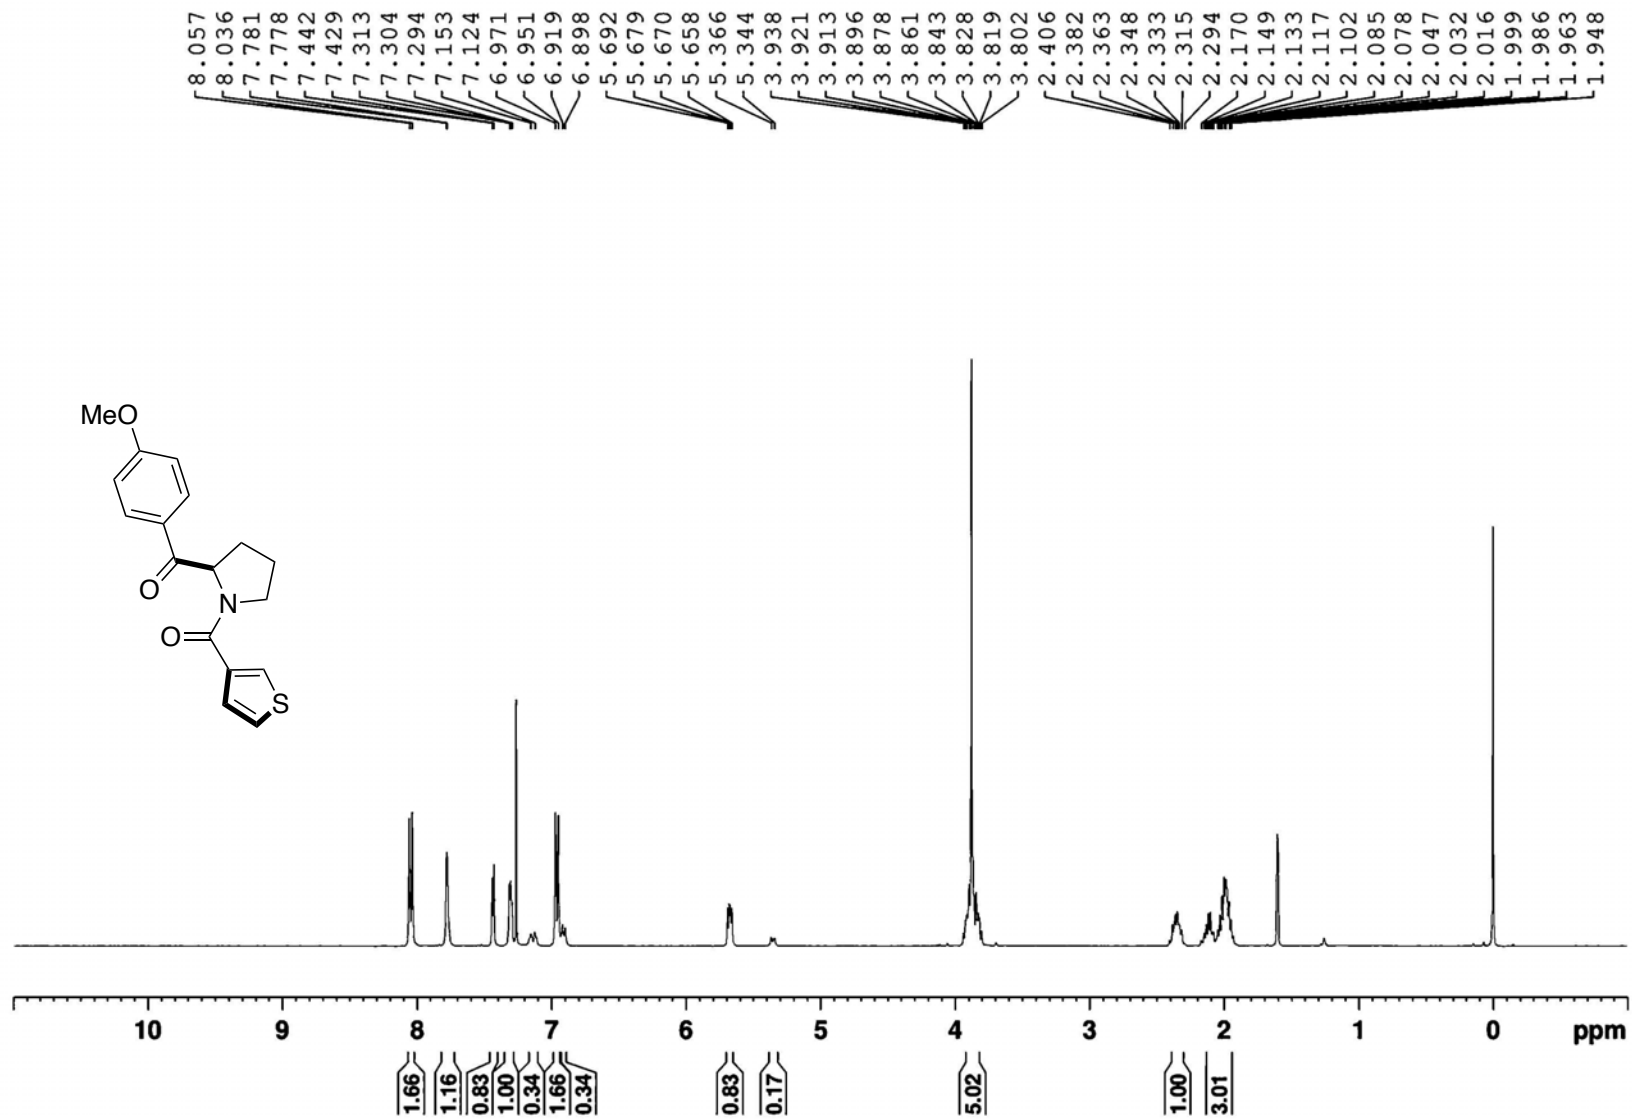

Supplementary Fig. 137 | <sup>1</sup>H NMR spectrum of 8ha

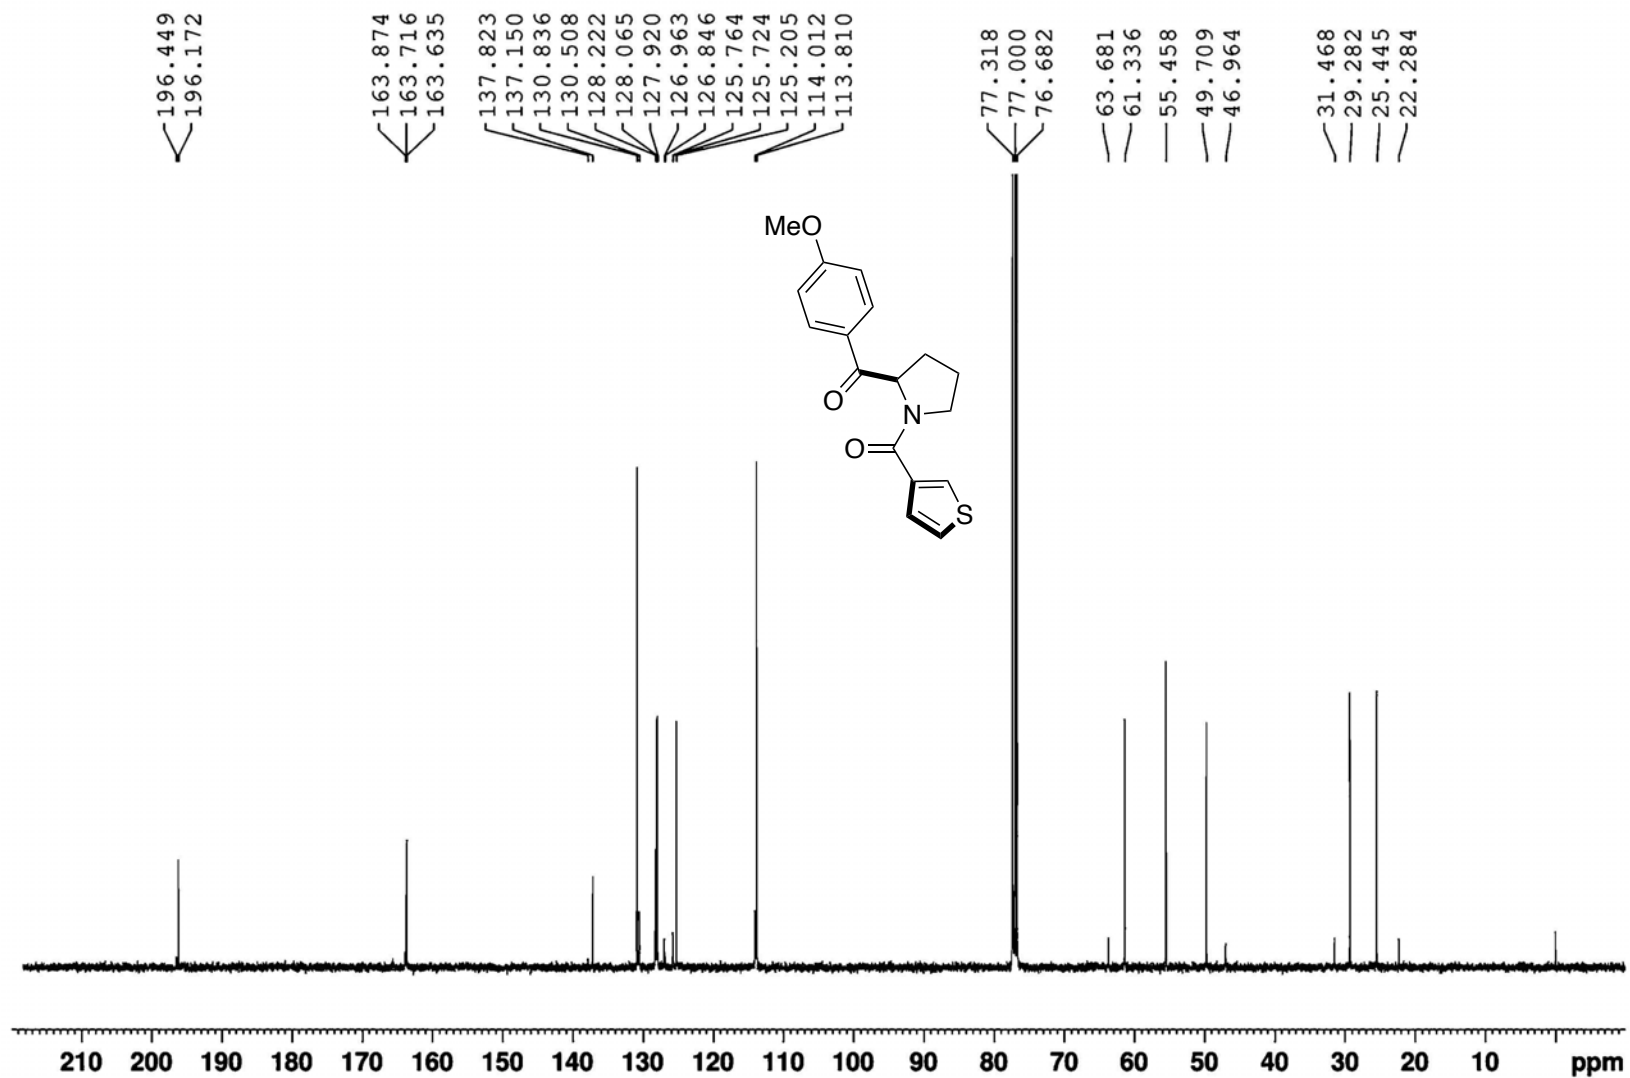

Supplementary Fig. 138 | <sup>13</sup>C NMR spectrum of 8ha

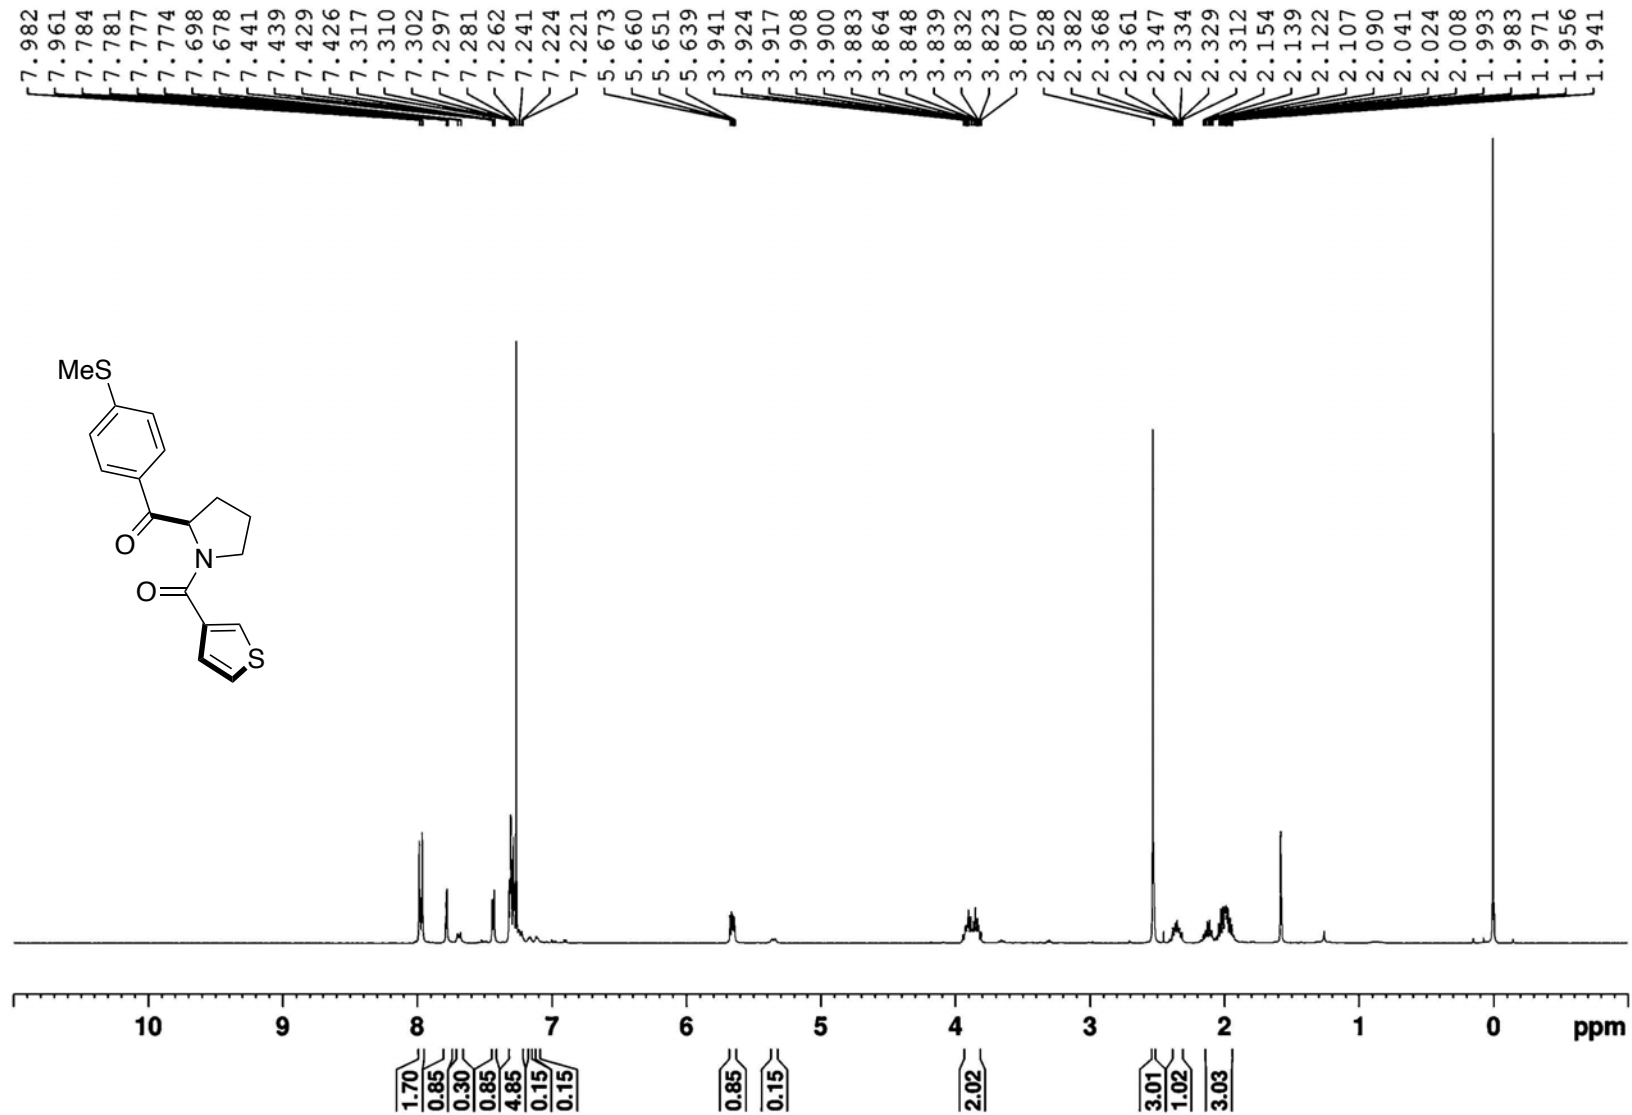

Supplementary Fig. 139 | <sup>1</sup>H NMR spectrum of **8ia**

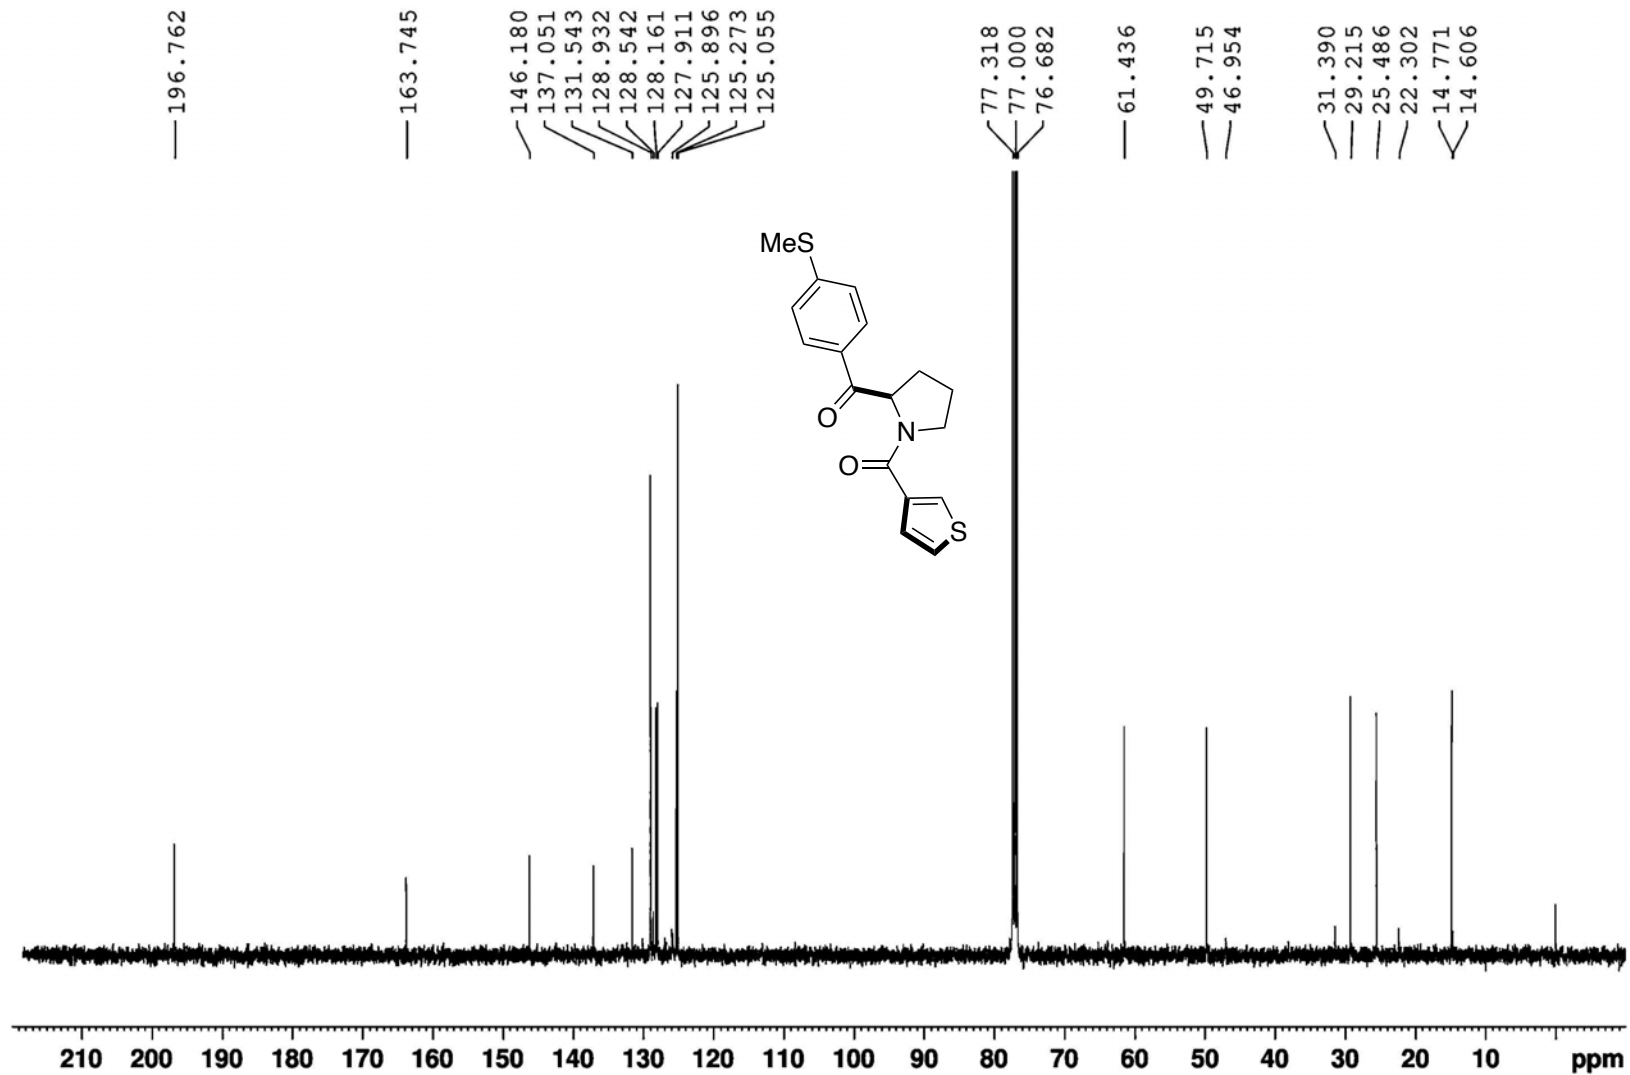

Supplementary Fig. 140 |  $^{13}\text{C}$  NMR spectrum of 8ia

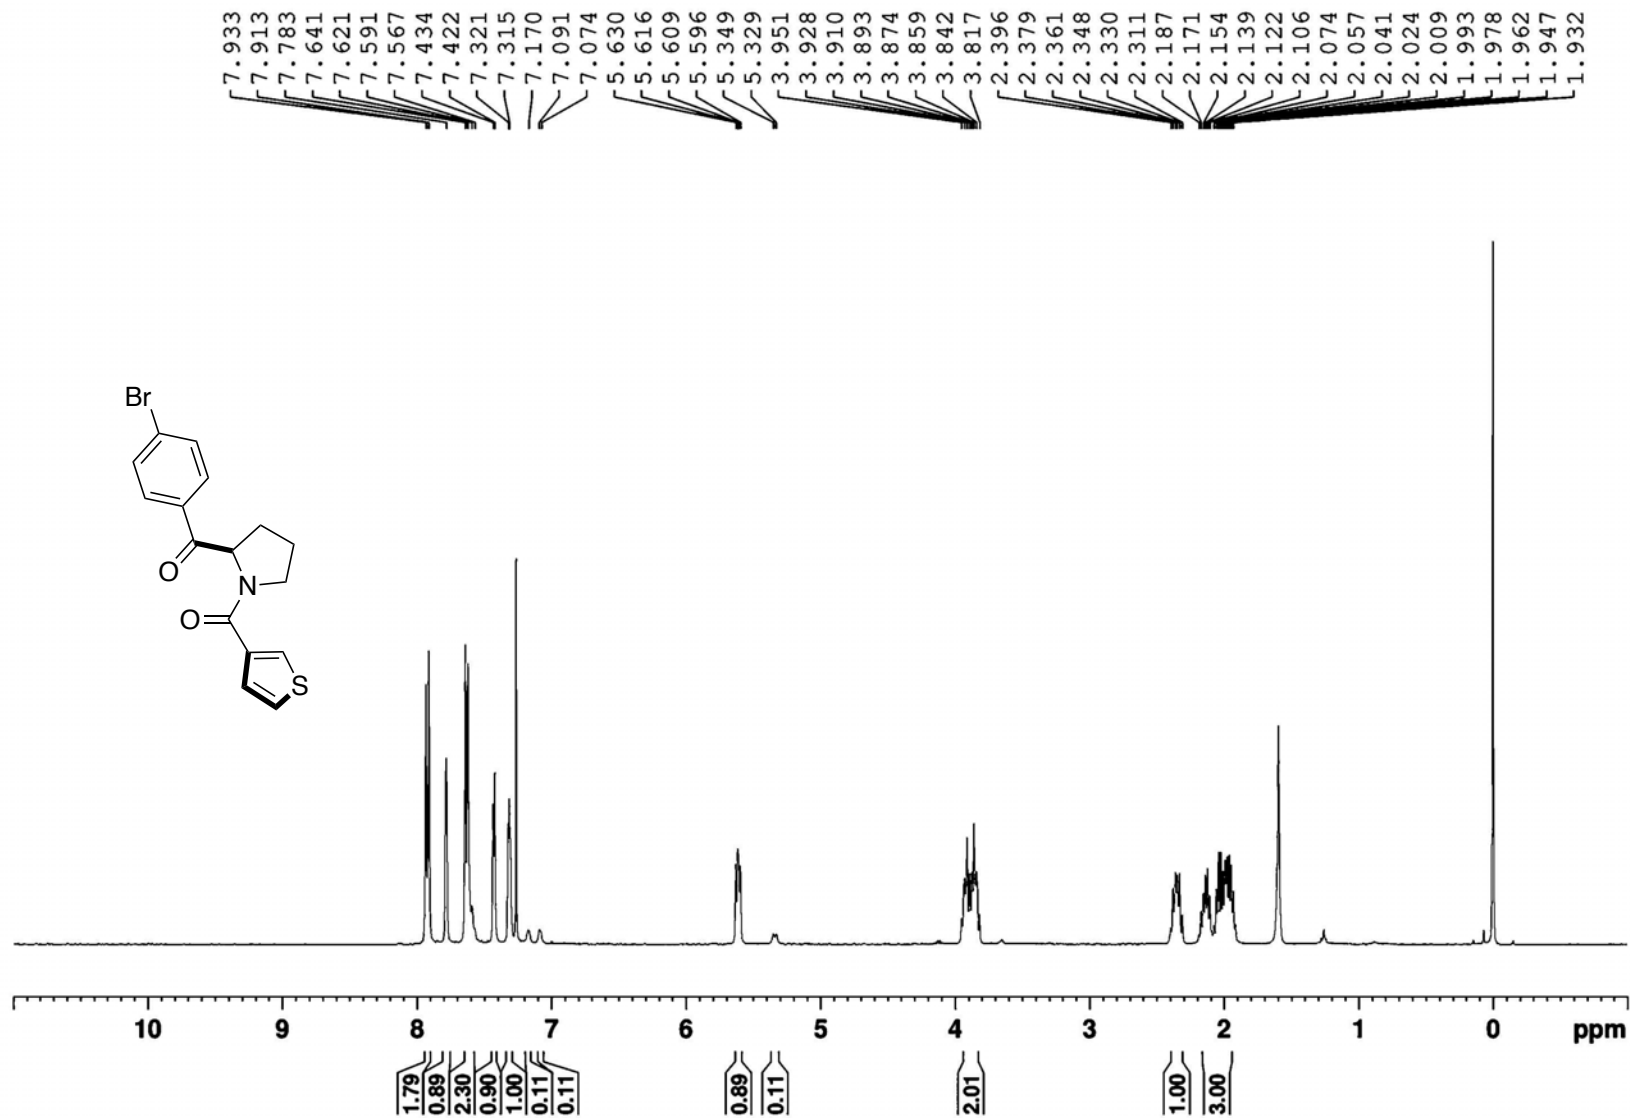

Supplementary Fig. 141 | <sup>1</sup>H NMR spectrum of 8ea

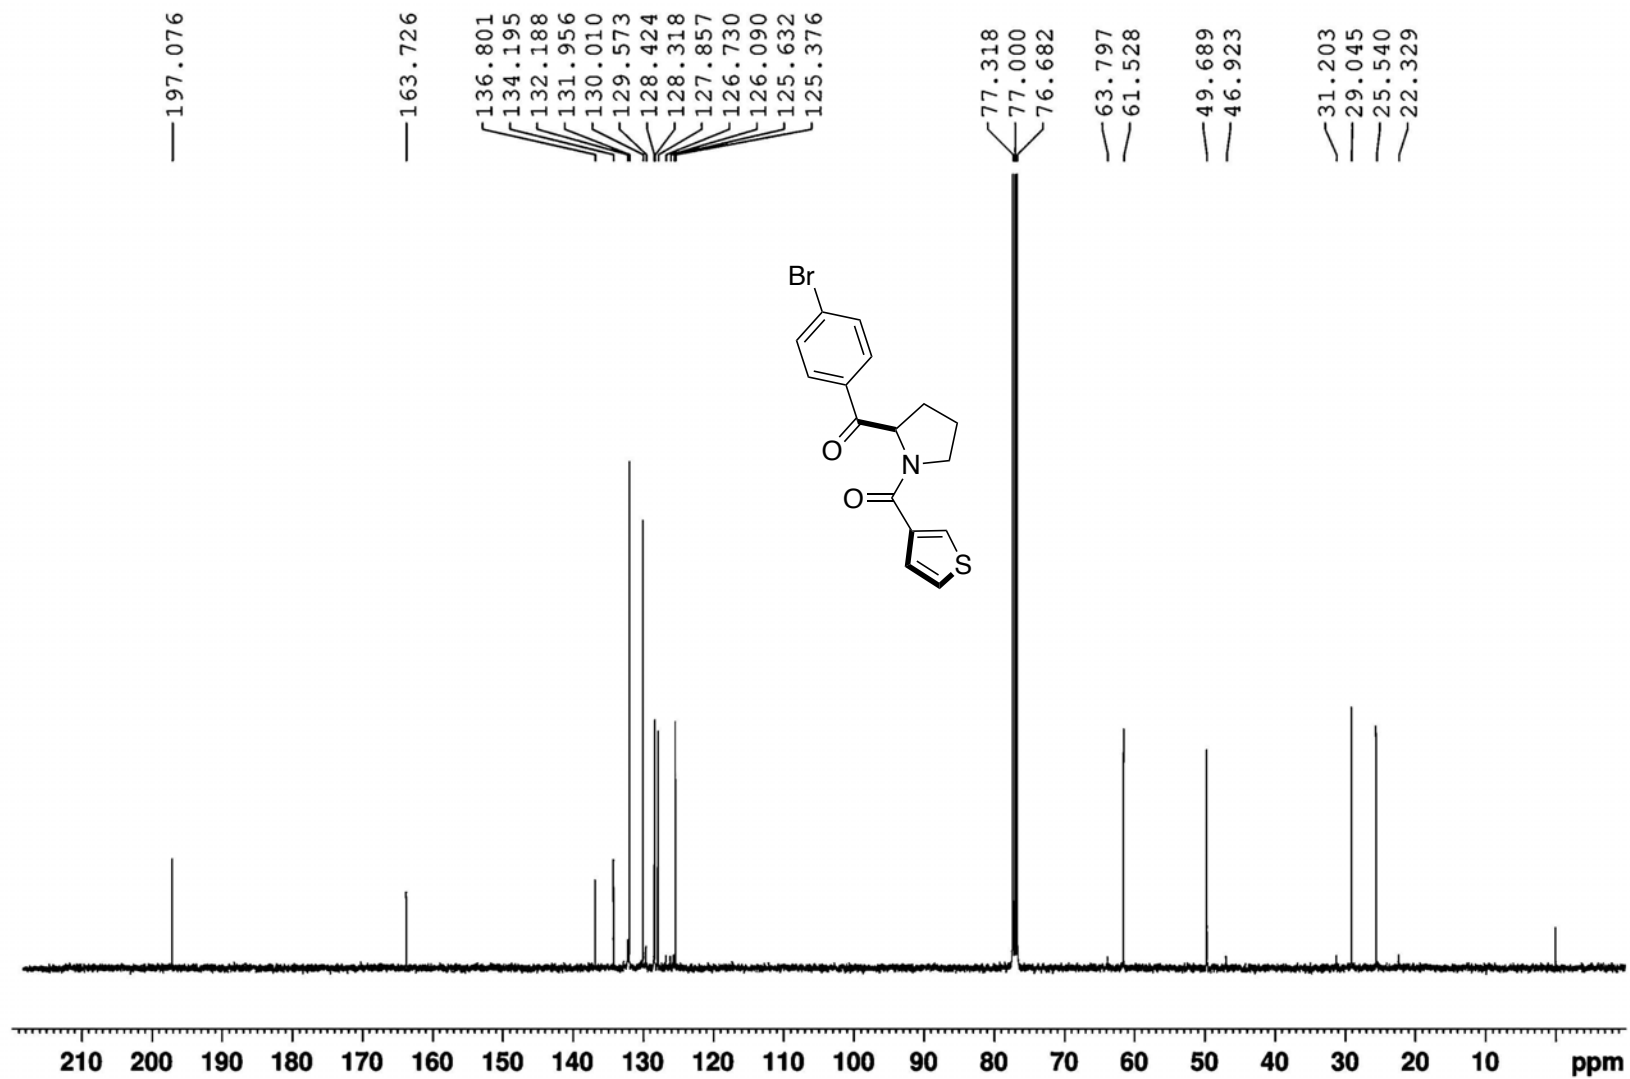

Supplementary Fig. 142 |  $^{13}\text{C}$  NMR spectrum of 8ea

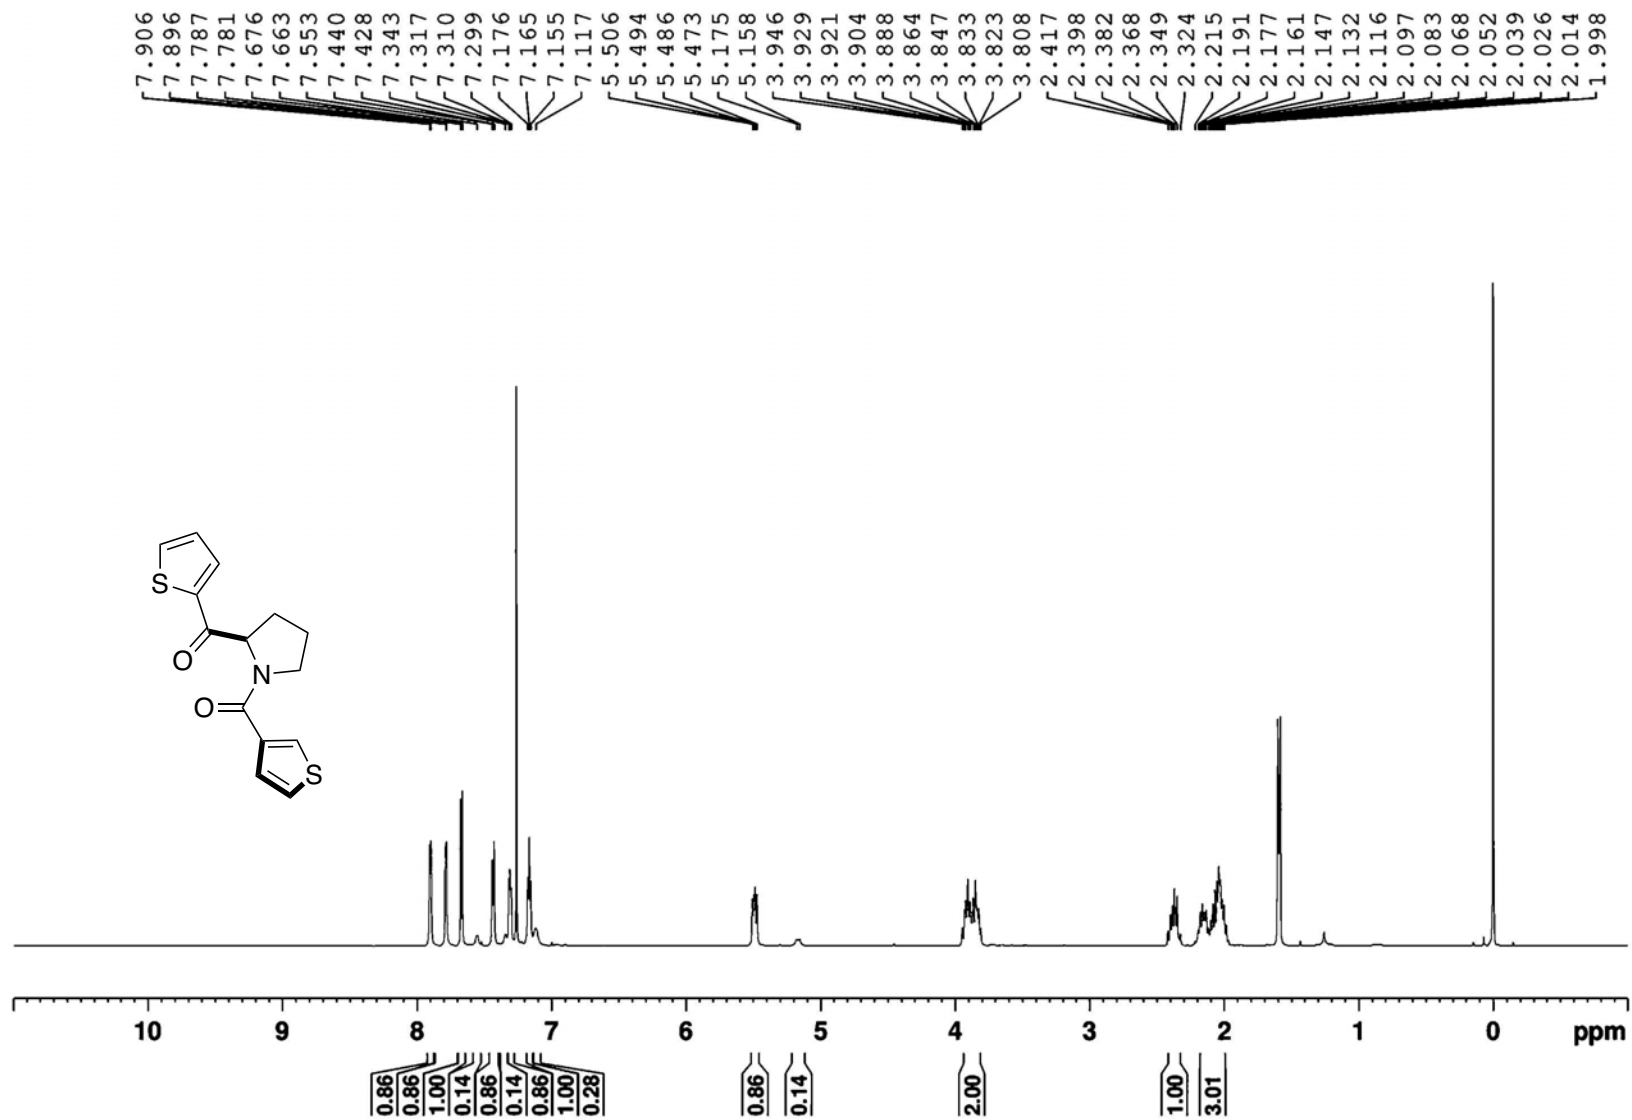

Supplementary Fig. 143 | <sup>1</sup>H NMR spectrum of **8ja**



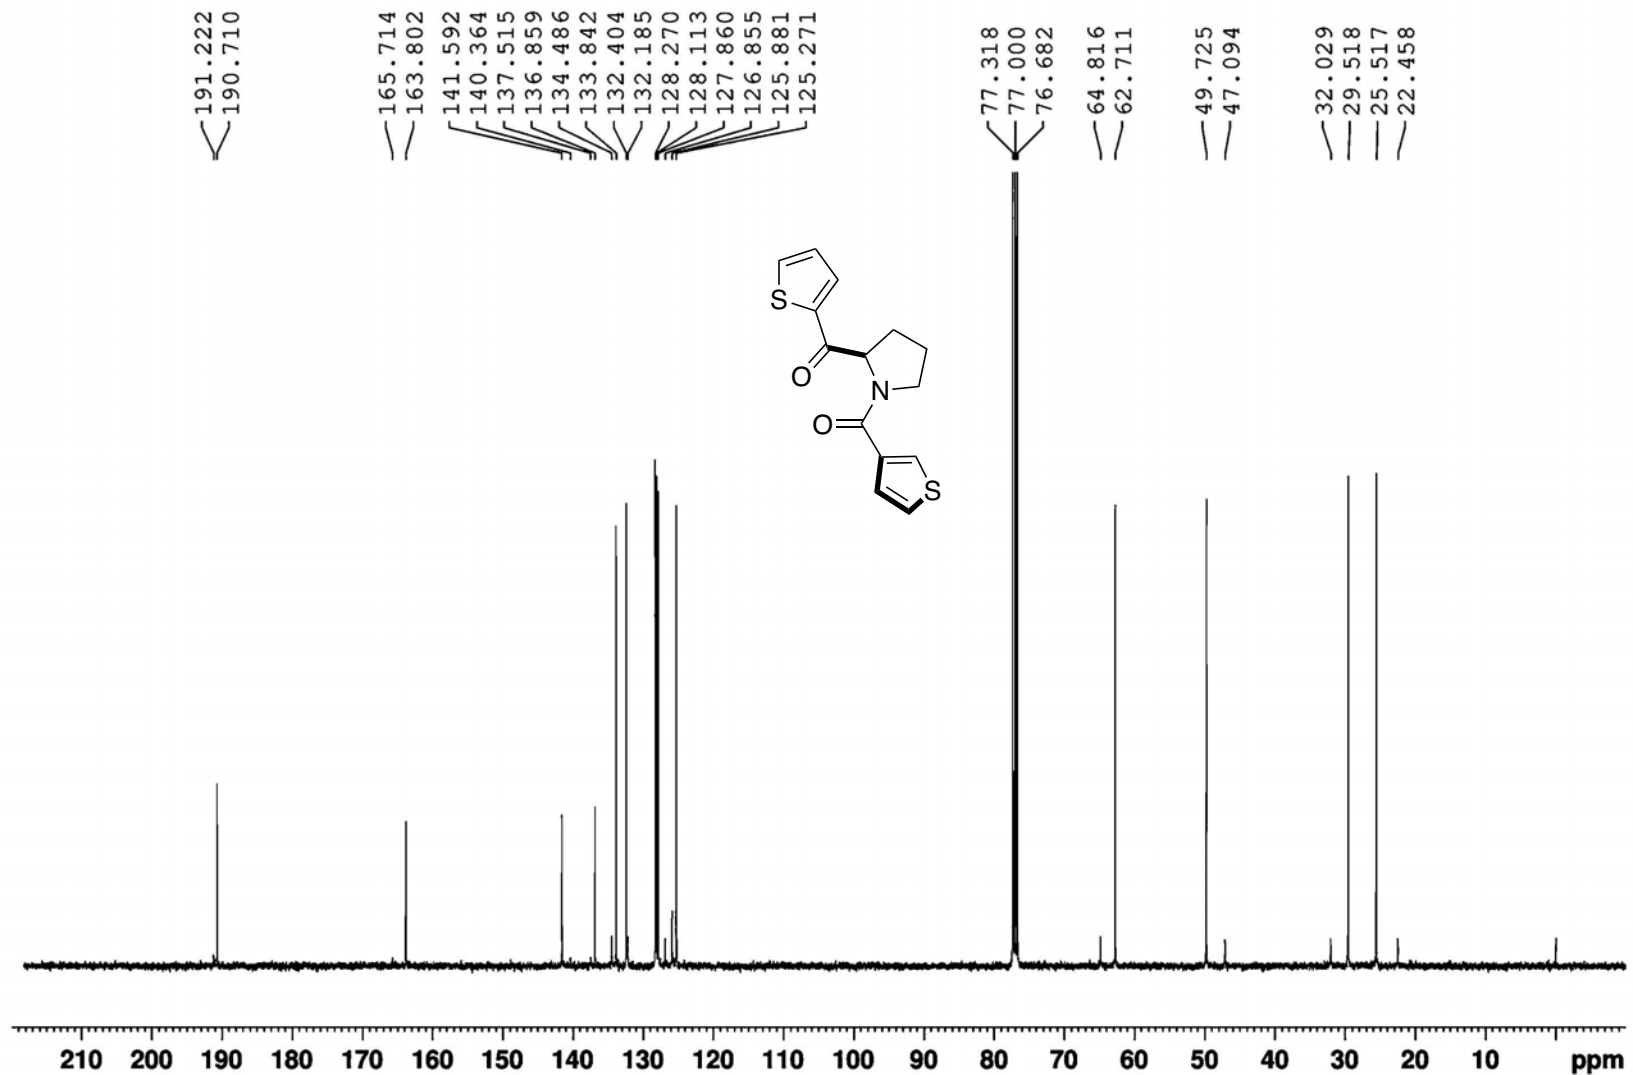

Supplementary Fig. 144 | <sup>13</sup>C NMR spectrum of **8ja**

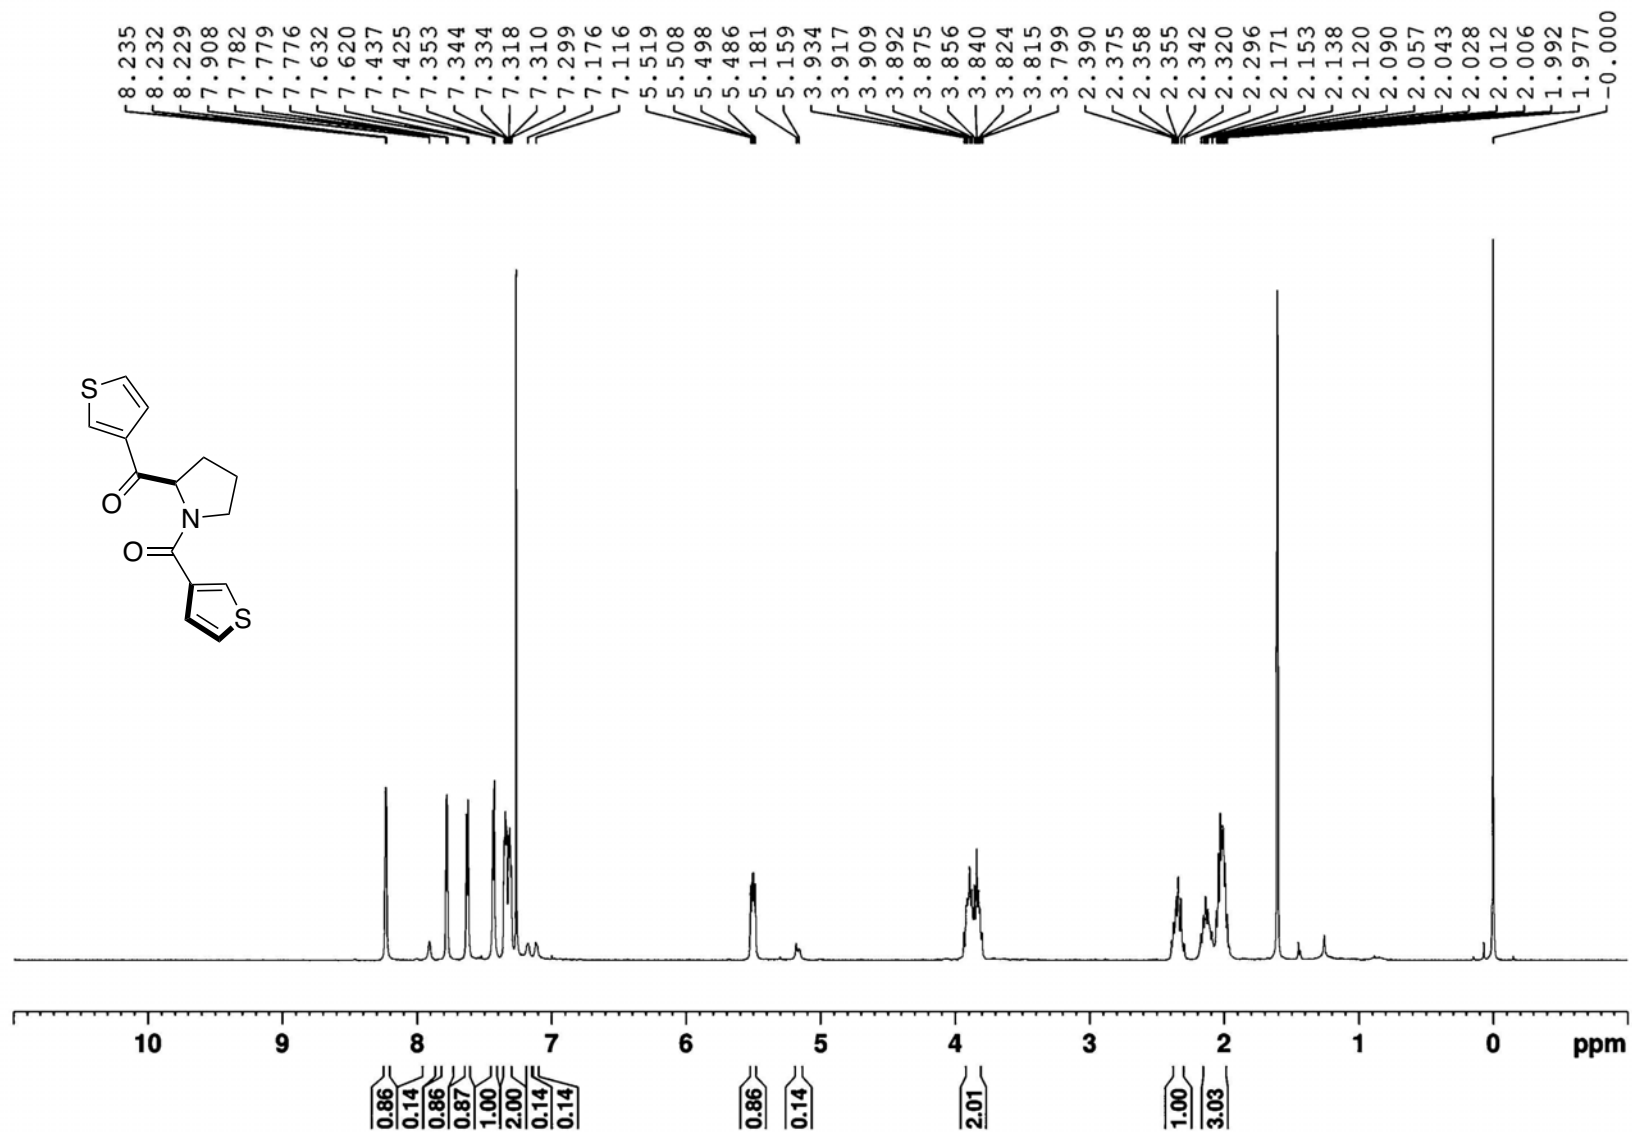

Supplementary Fig. 145 | <sup>1</sup>H NMR spectrum of 8na

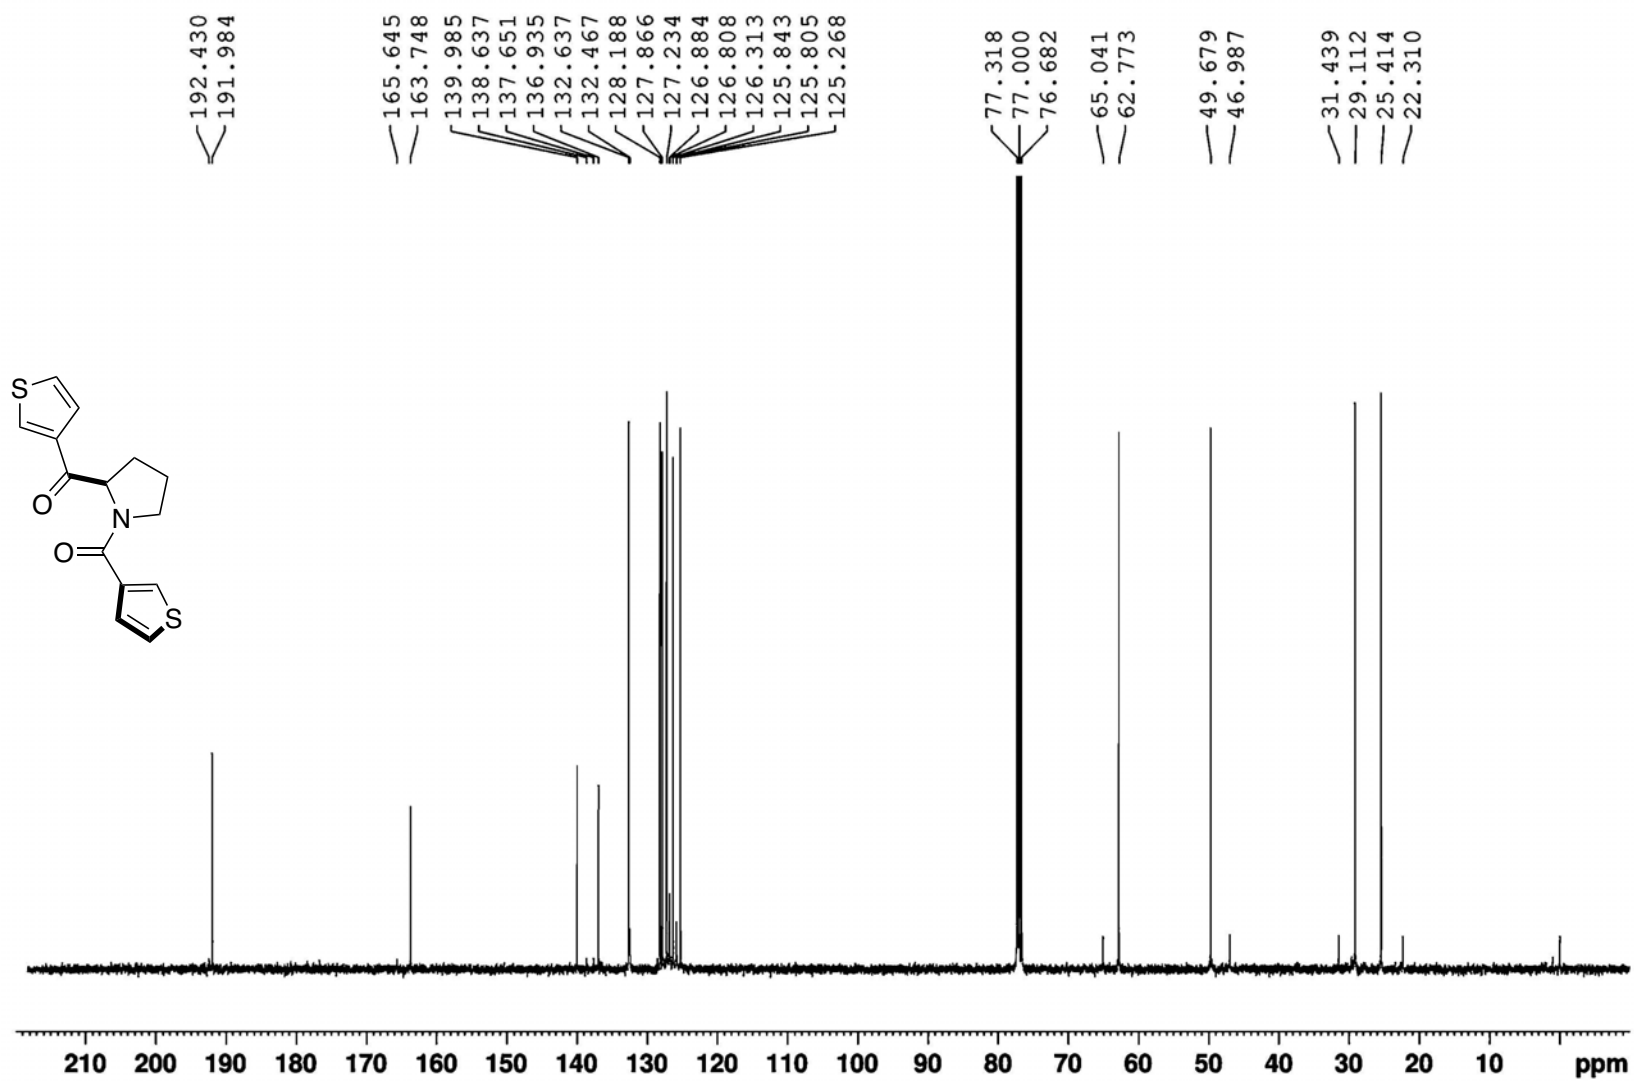

Supplementary Fig. 146 |  $^{13}\text{C}$  NMR spectrum of 8na

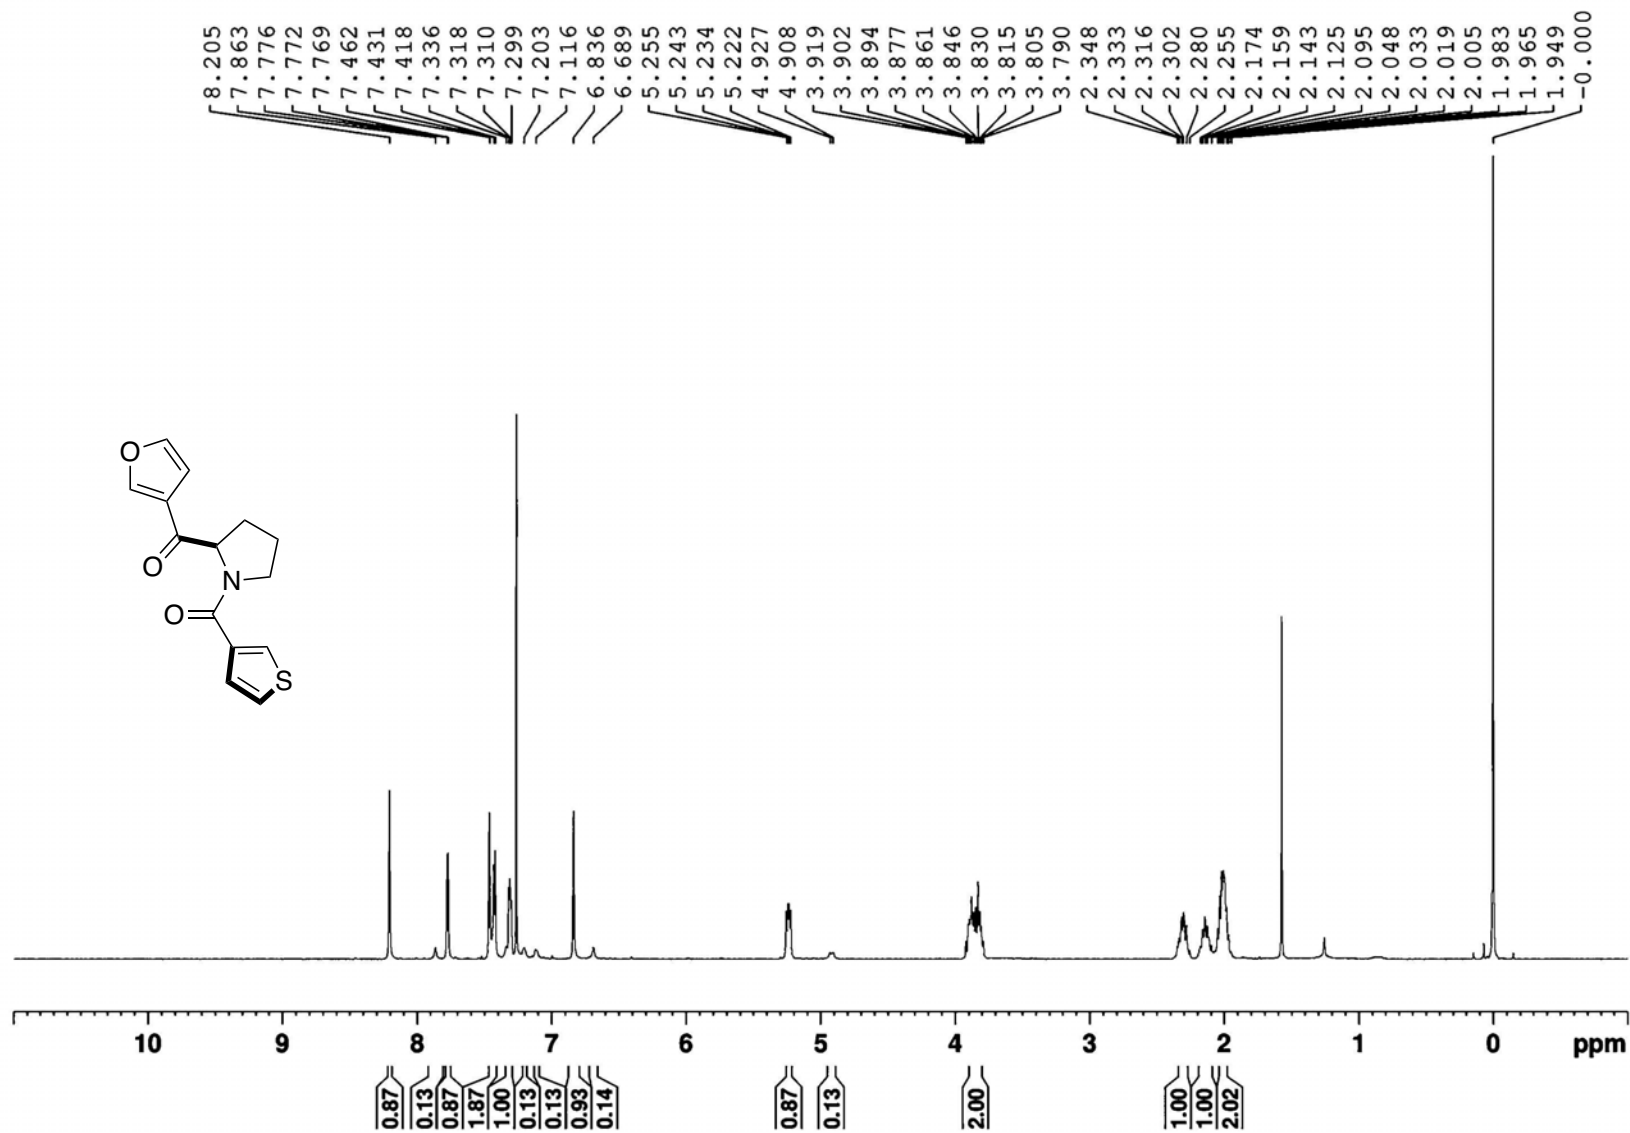

Supplementary Fig. 147 | <sup>1</sup>H NMR spectrum of 80a

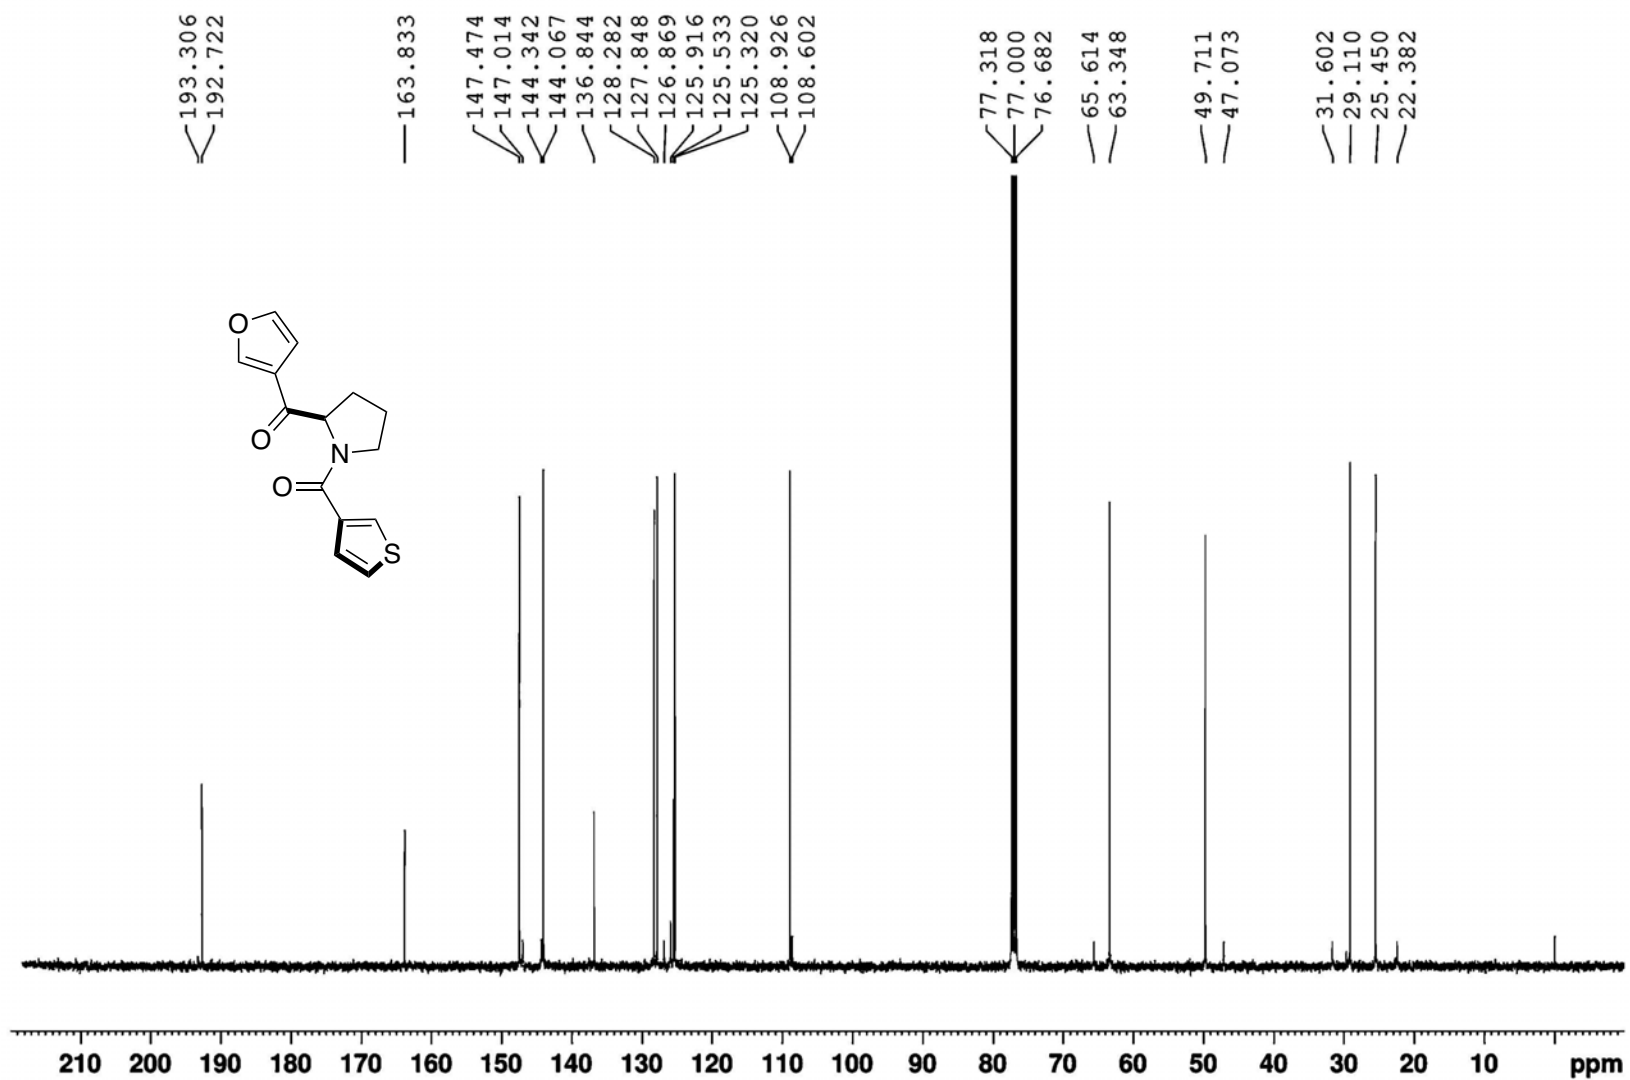

Supplementary Fig. 148 |  $^{13}\text{C}$  NMR spectrum of 80a

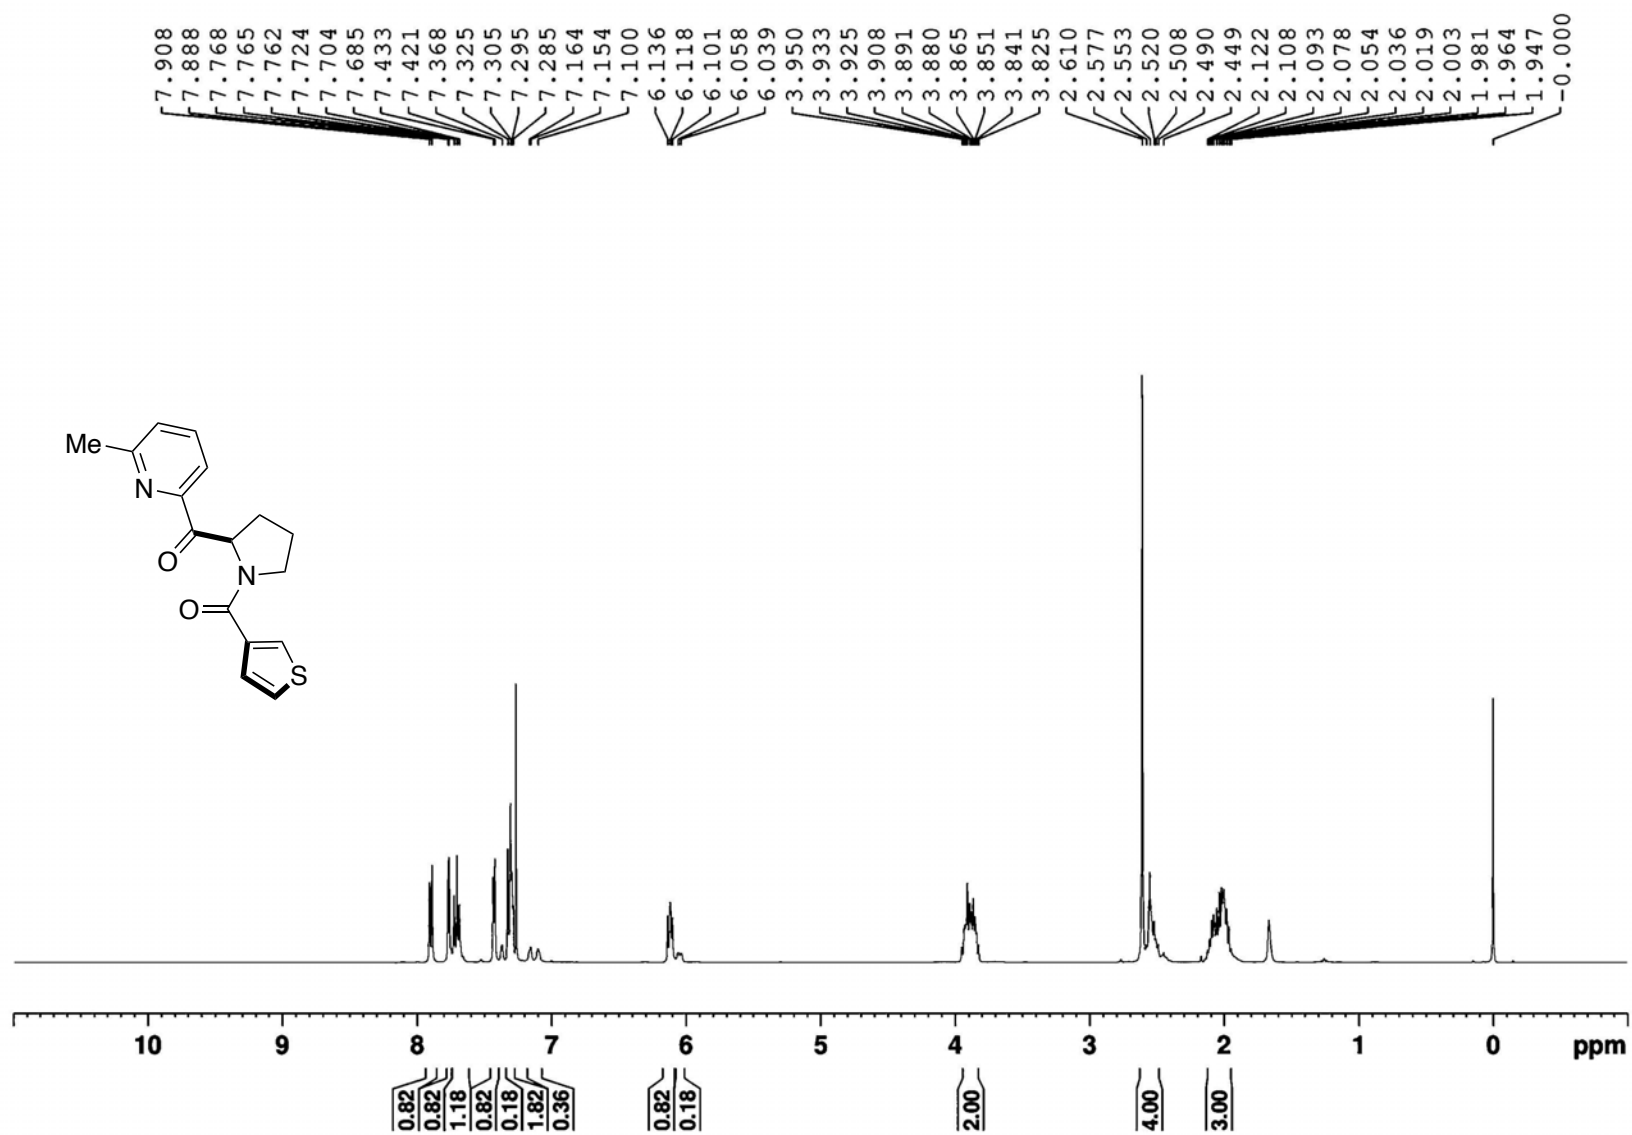

Supplementary Fig. 149 | <sup>1</sup>H NMR spectrum of 8pa

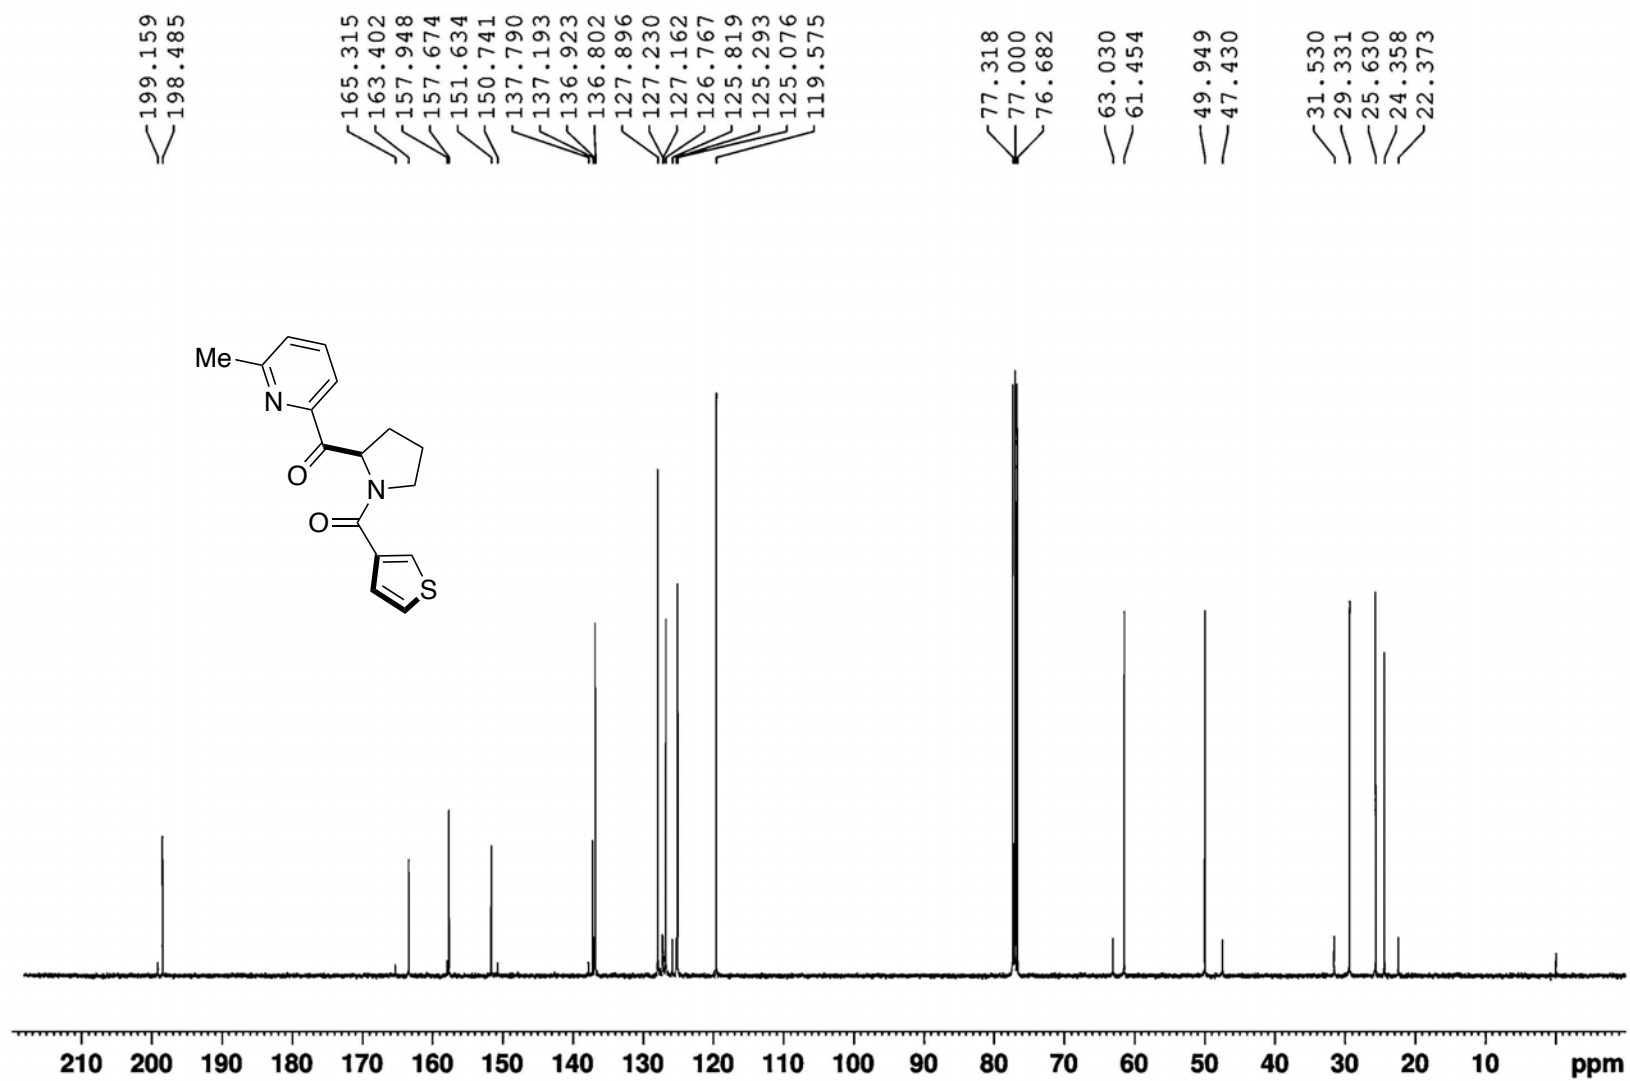

Supplementary Fig. 150 |  $^{13}\text{C}$  NMR spectrum of 8pa

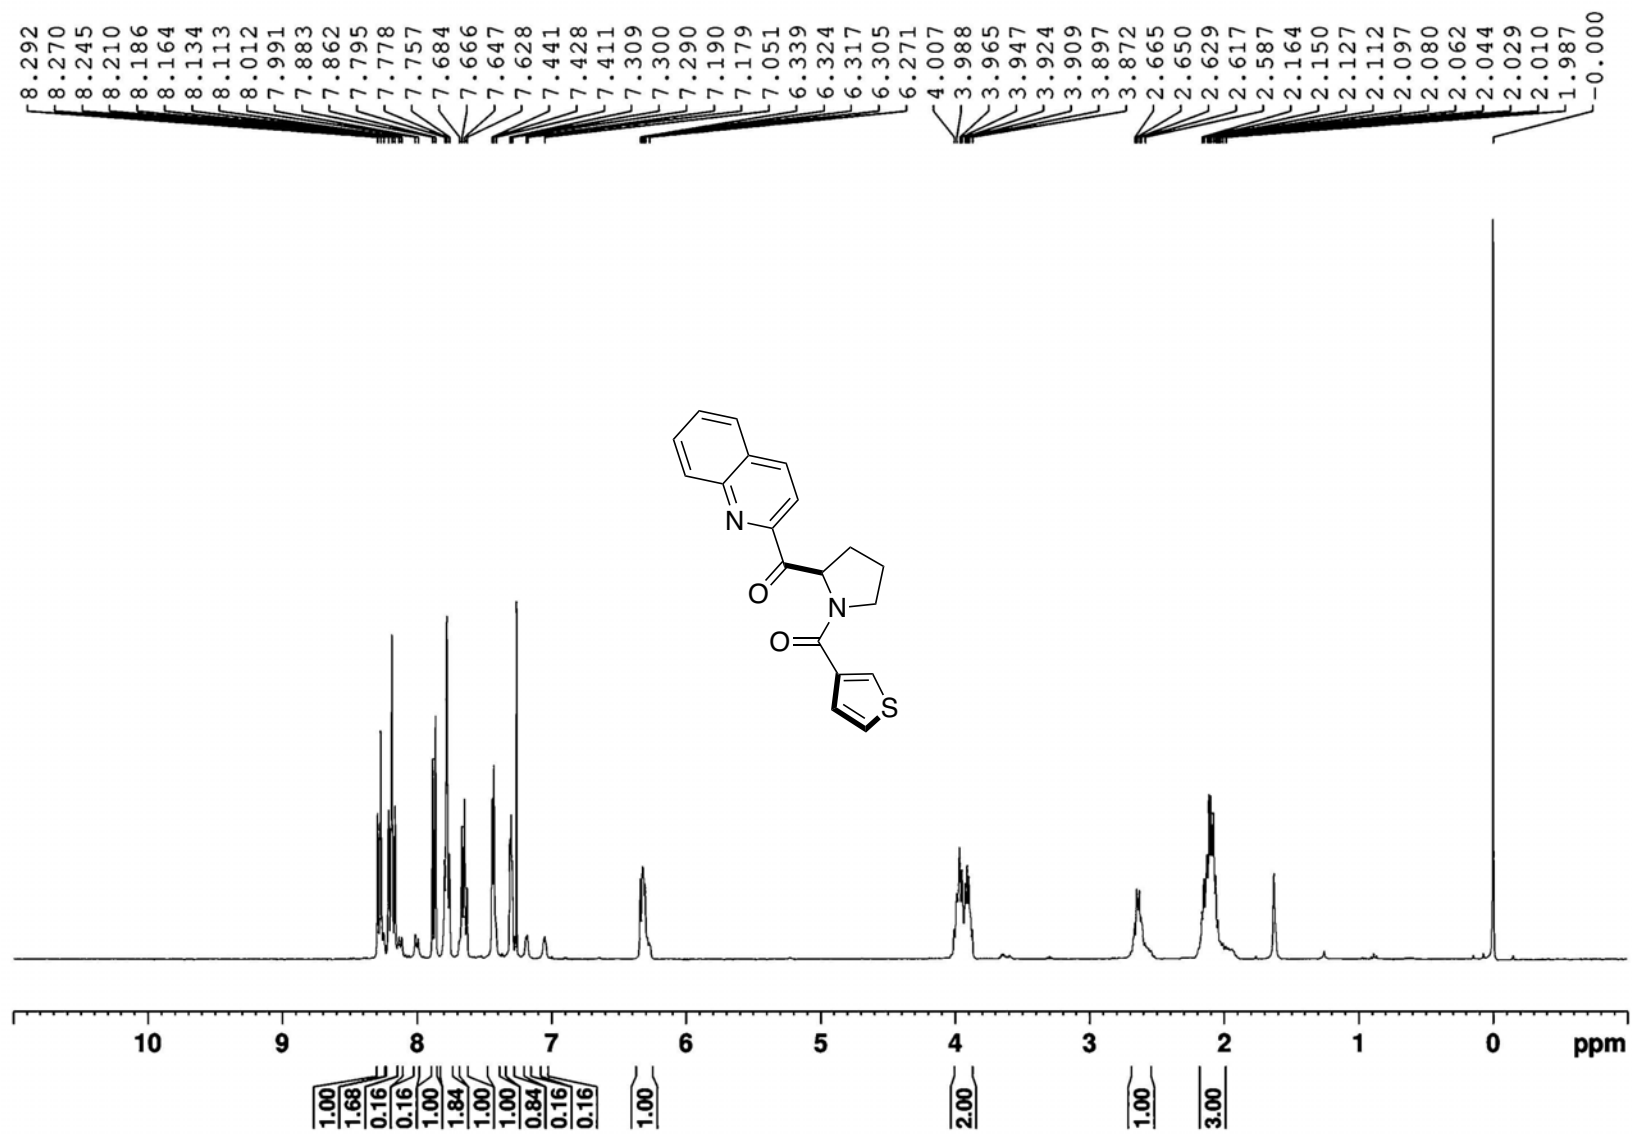

Supplementary Fig. 151 | <sup>1</sup>H NMR spectrum of 8qa



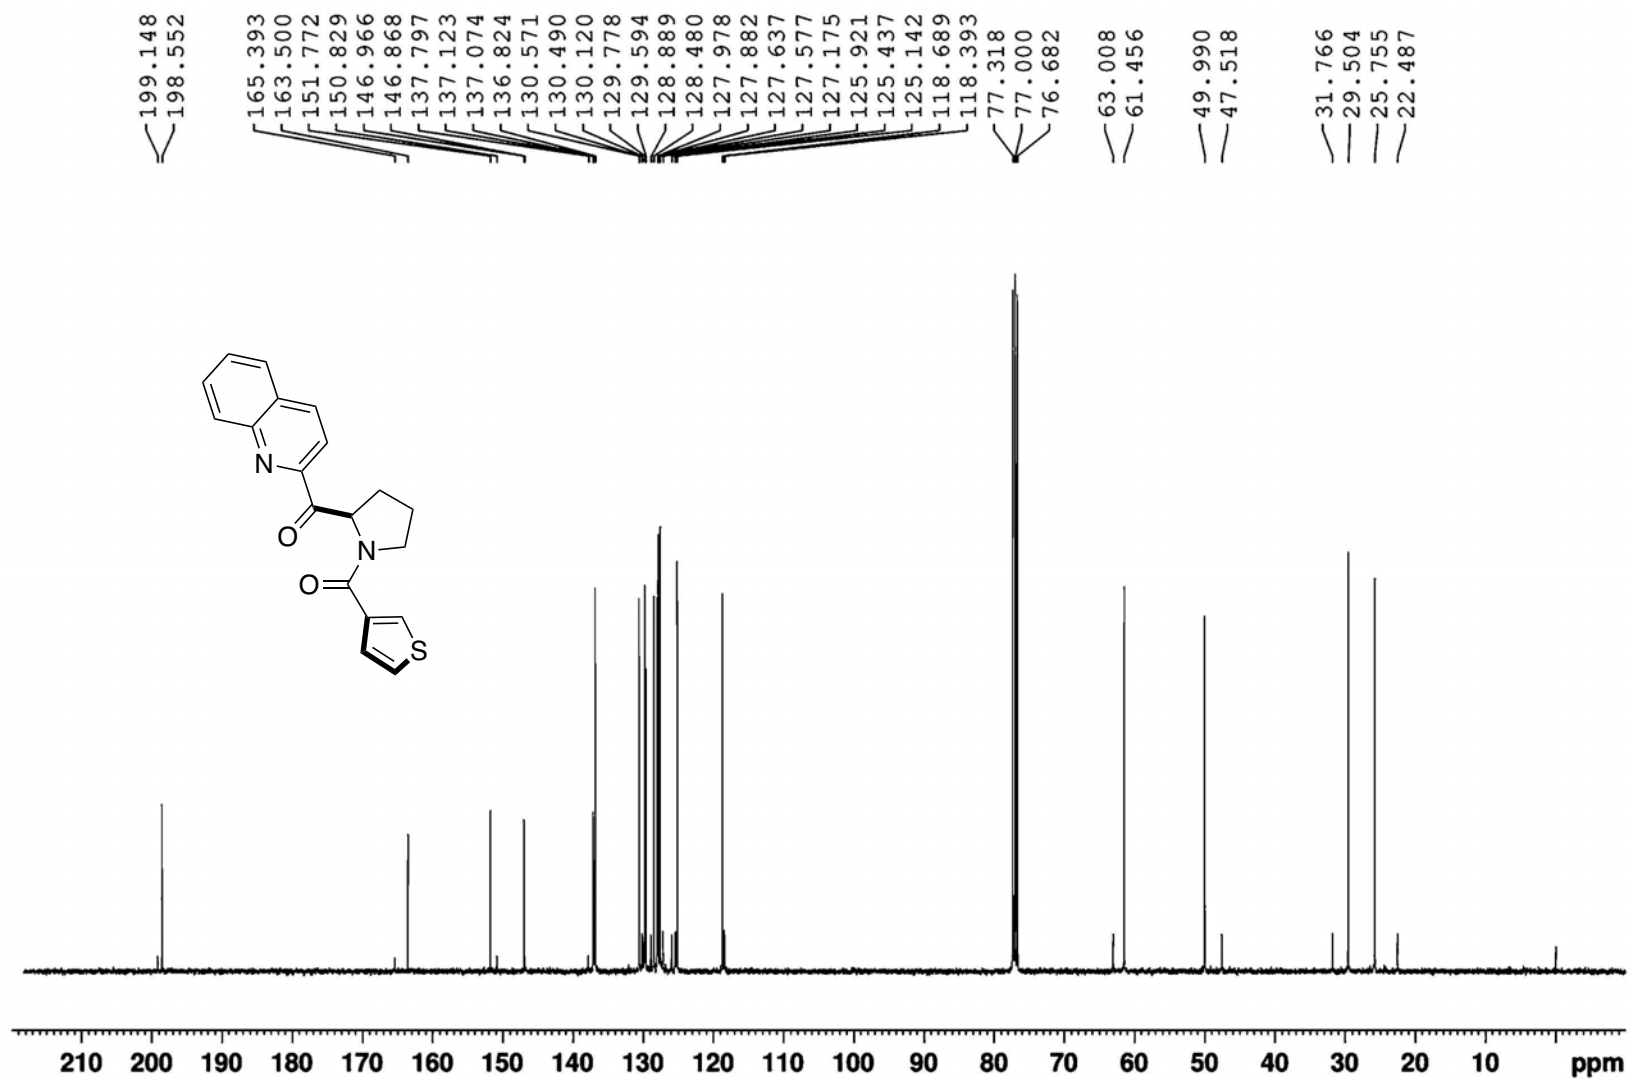

Supplementary Fig. 152 |  $^{13}\text{C}$  NMR spectrum of 8qa

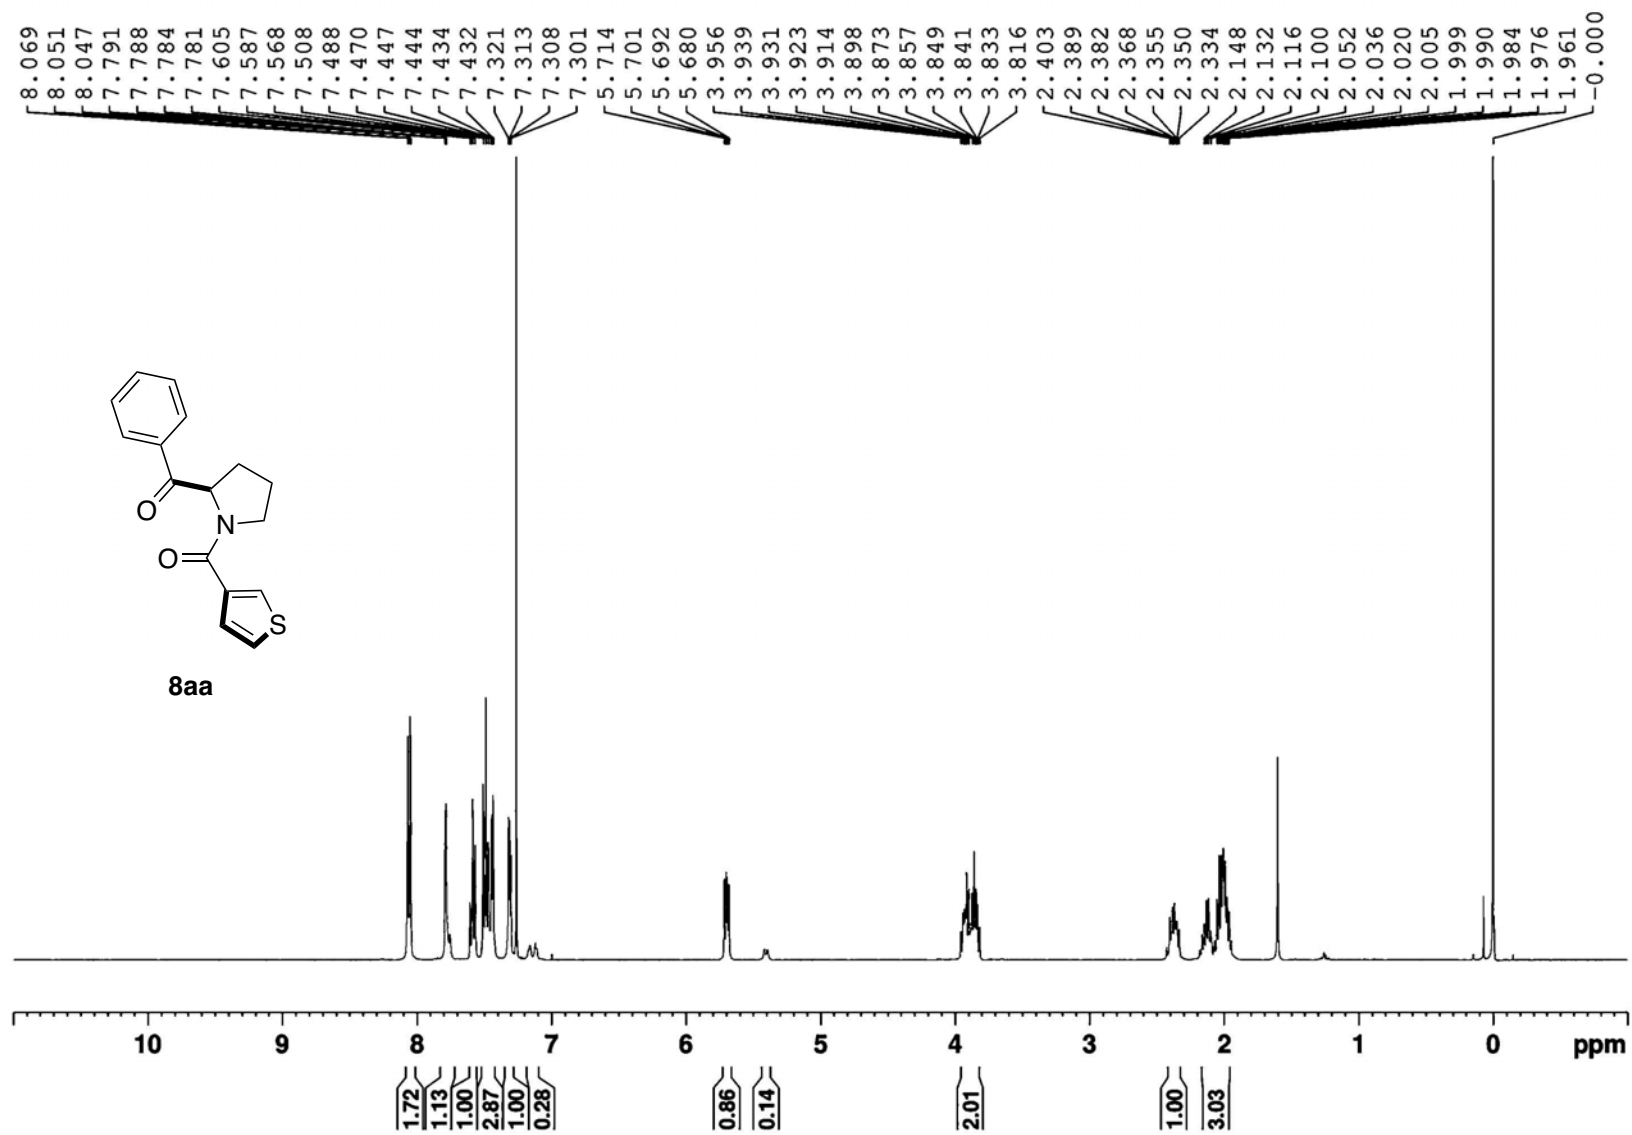

Supplementary Fig. 153 | <sup>1</sup>H NMR spectrum of **8aa**

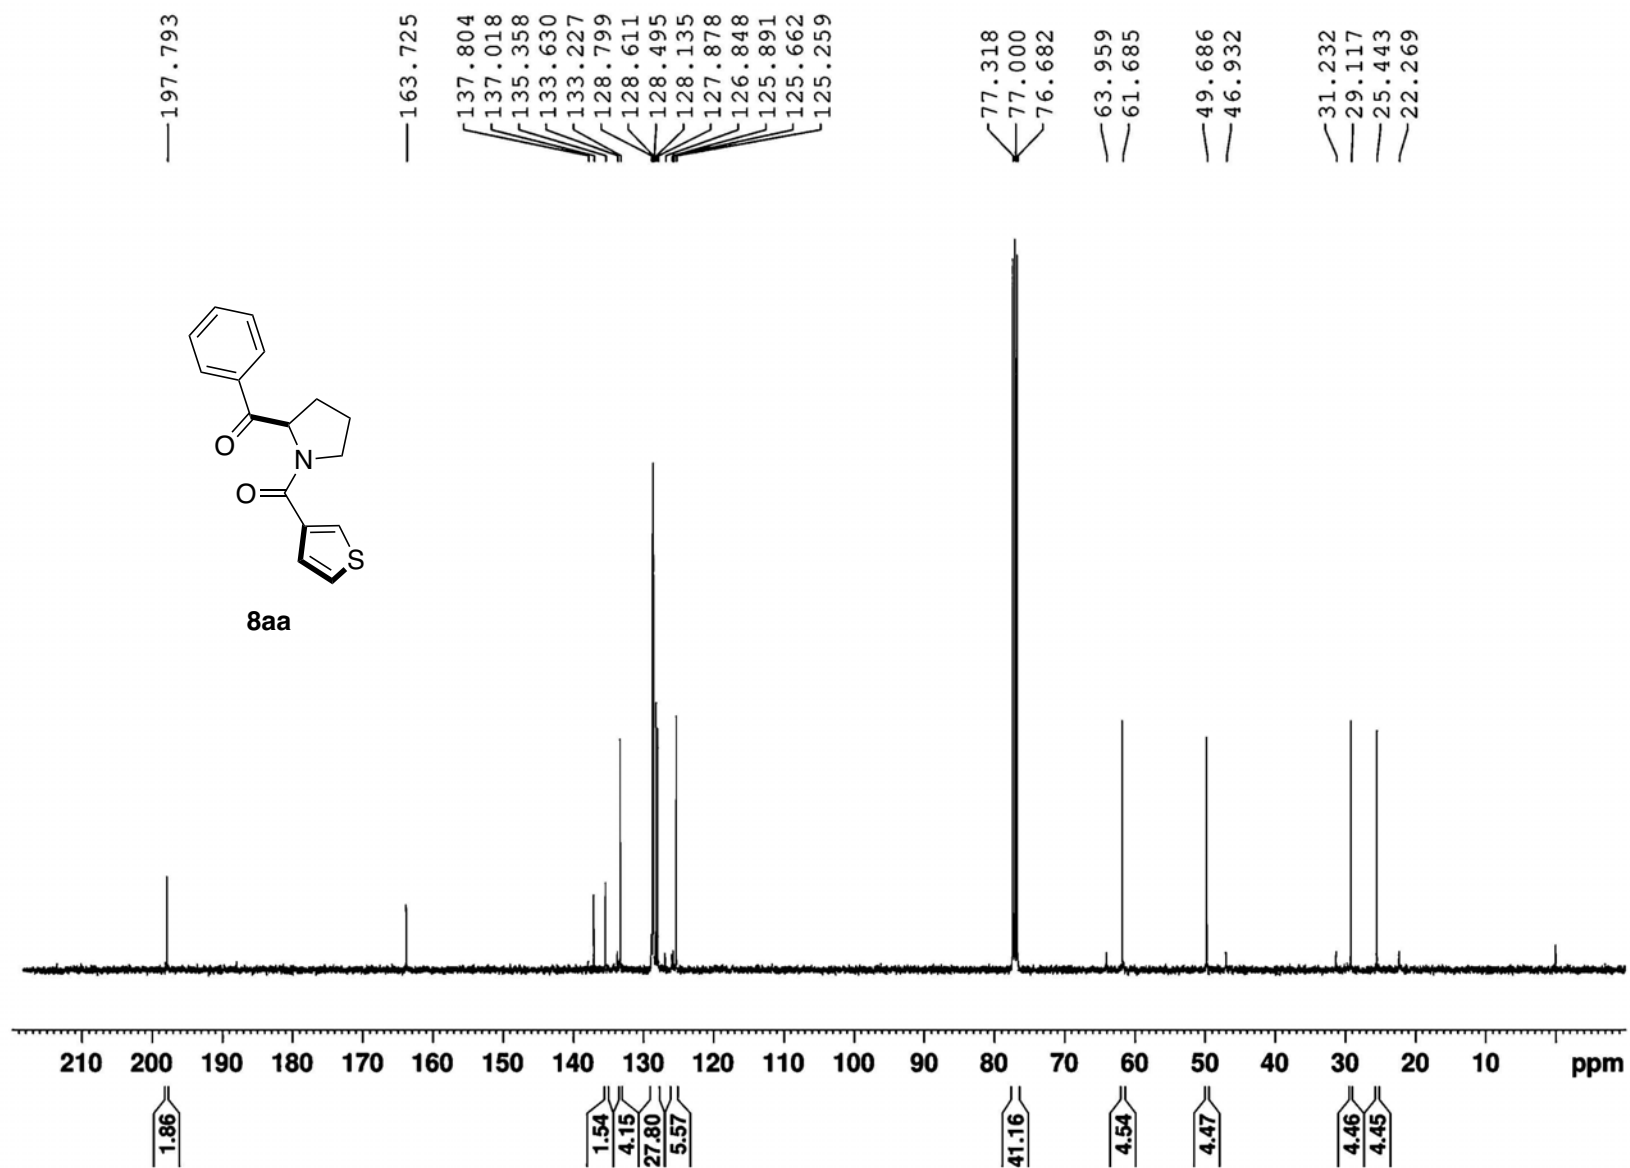

Supplementary Fig. 154 |  $^{13}\text{C}$  NMR spectrum of **8aa**

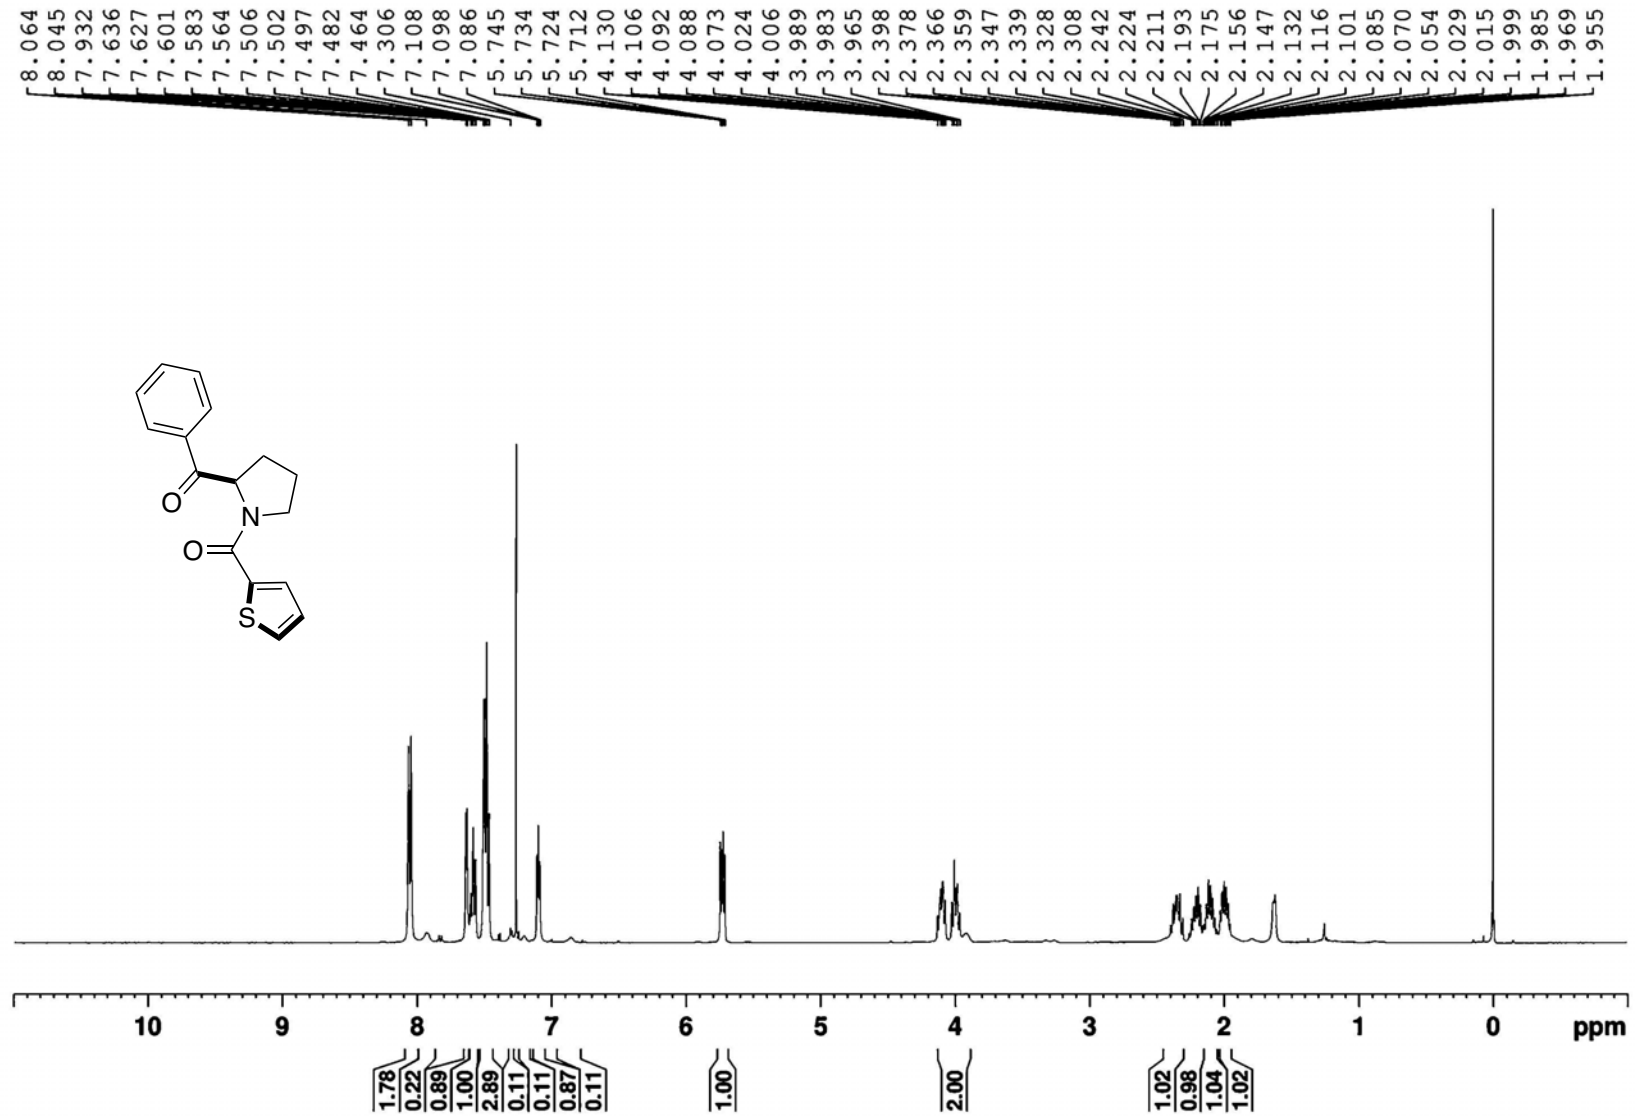

Supplementary Fig. 155 | <sup>1</sup>H NMR spectrum of 8aa-A

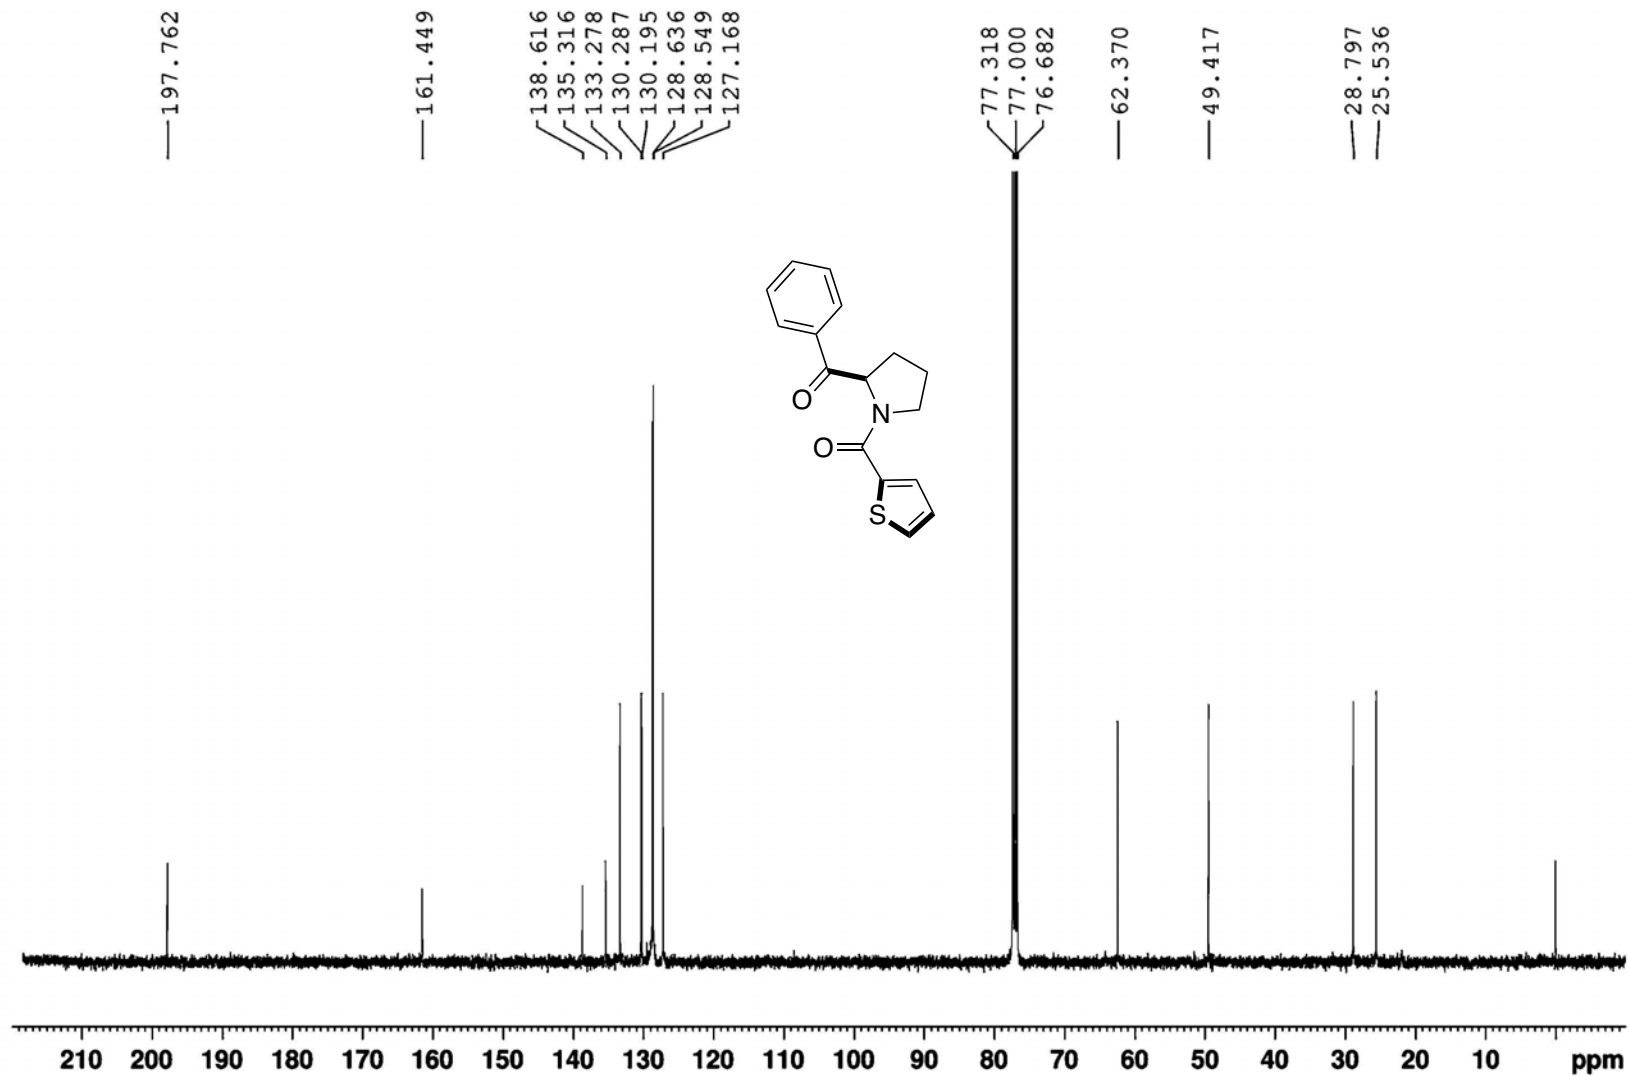

Supplementary Fig. 156 | <sup>13</sup>C NMR spectrum of 8aa-A

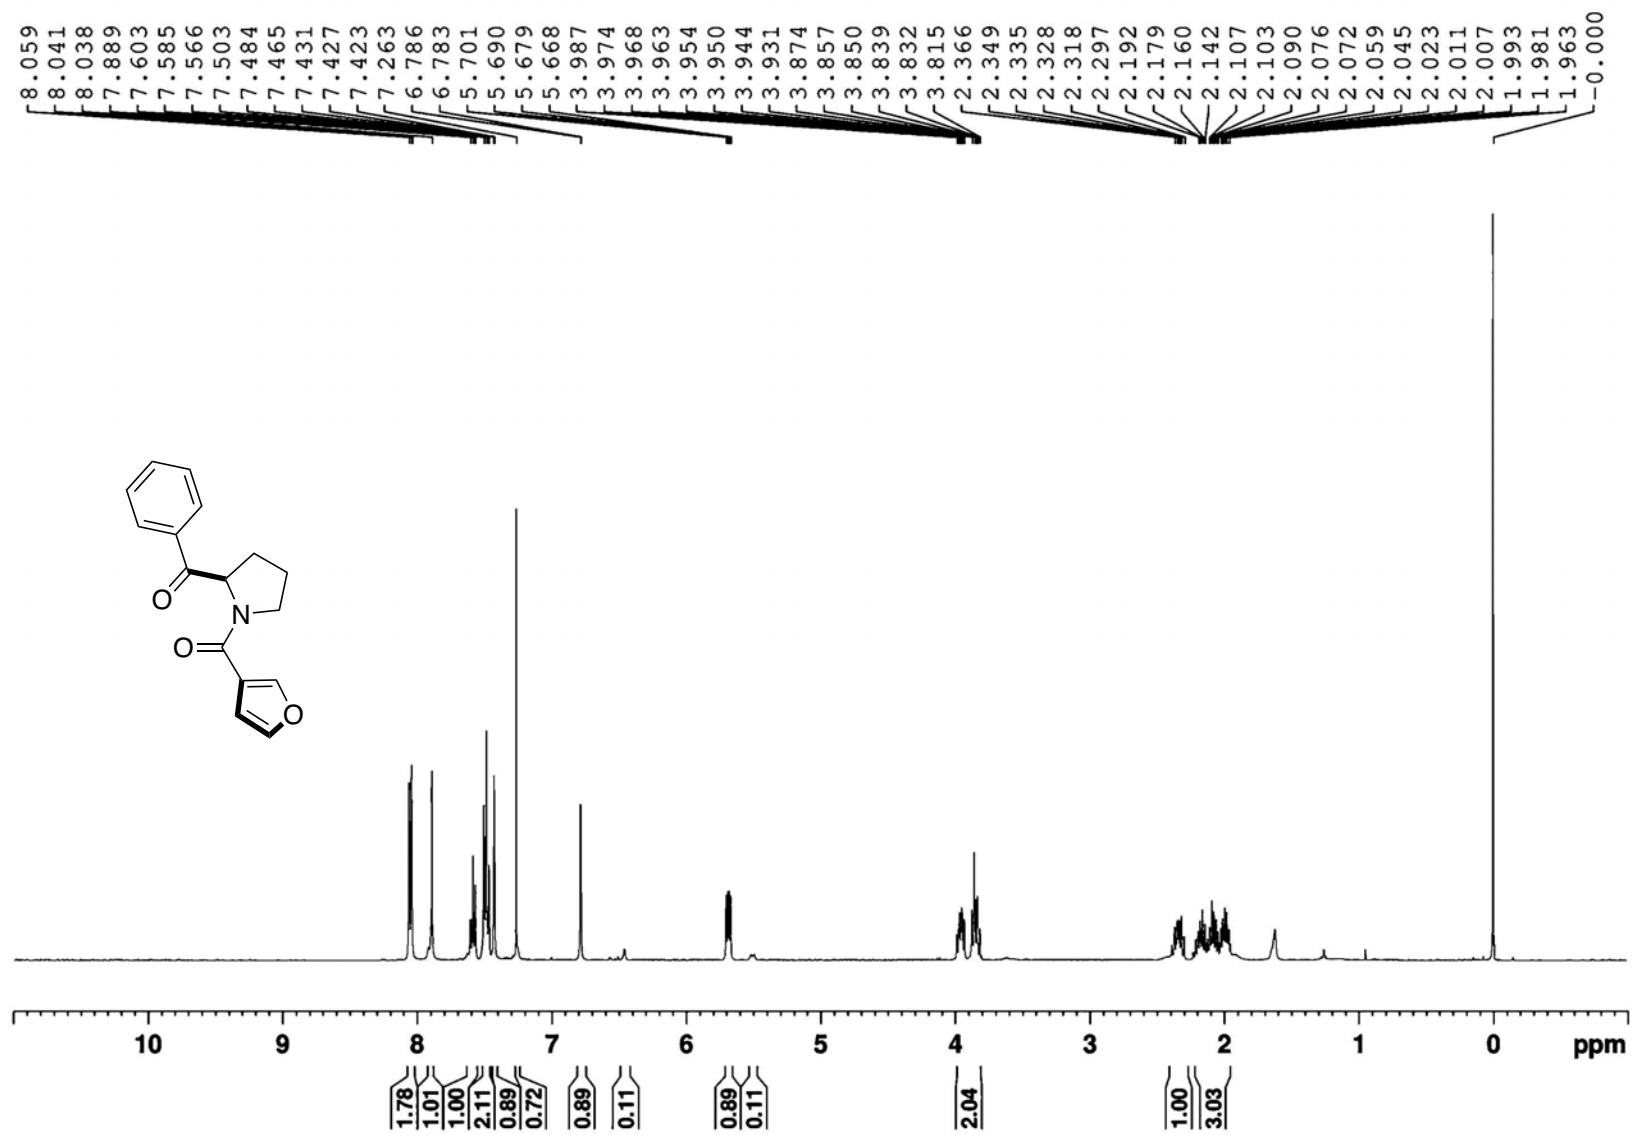

Supplementary Fig. 157 | <sup>1</sup>H NMR spectrum of 8aa-B

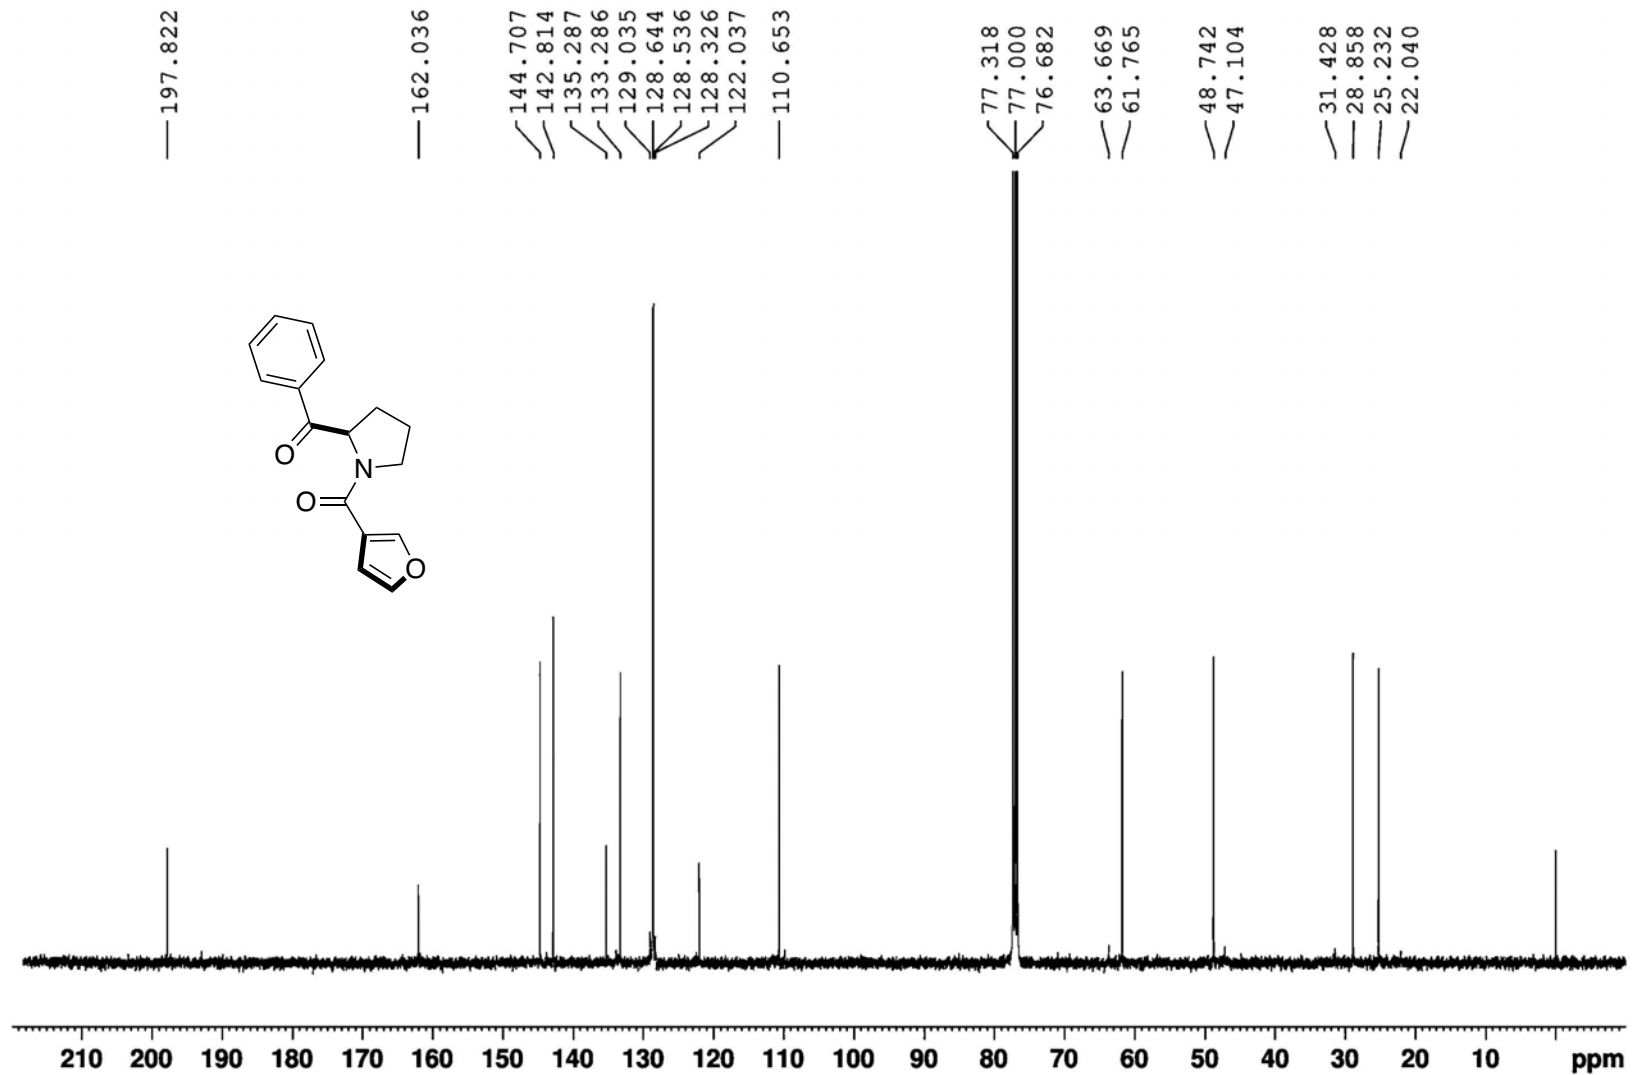

Supplementary Fig. 158 | <sup>13</sup>C NMR spectrum of 8aa-B

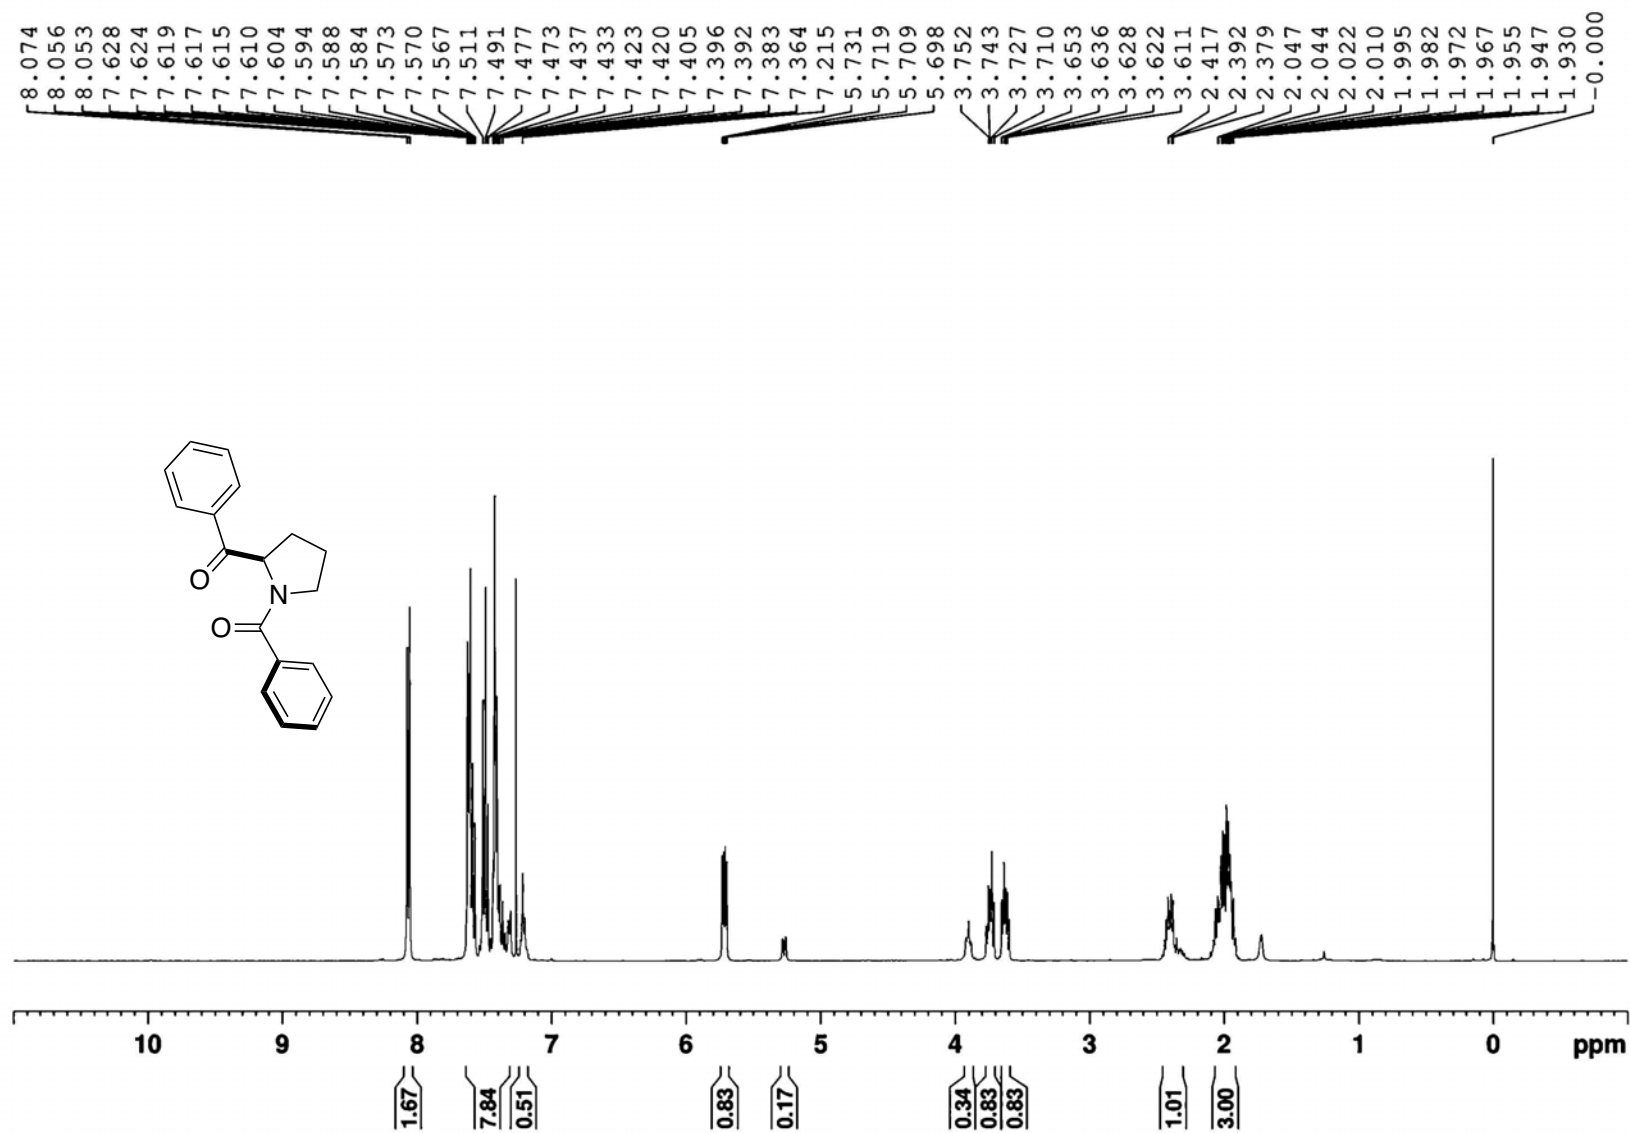

Supplementary Fig. 159 |  $^1\text{H}$  NMR spectrum of 8aa-C



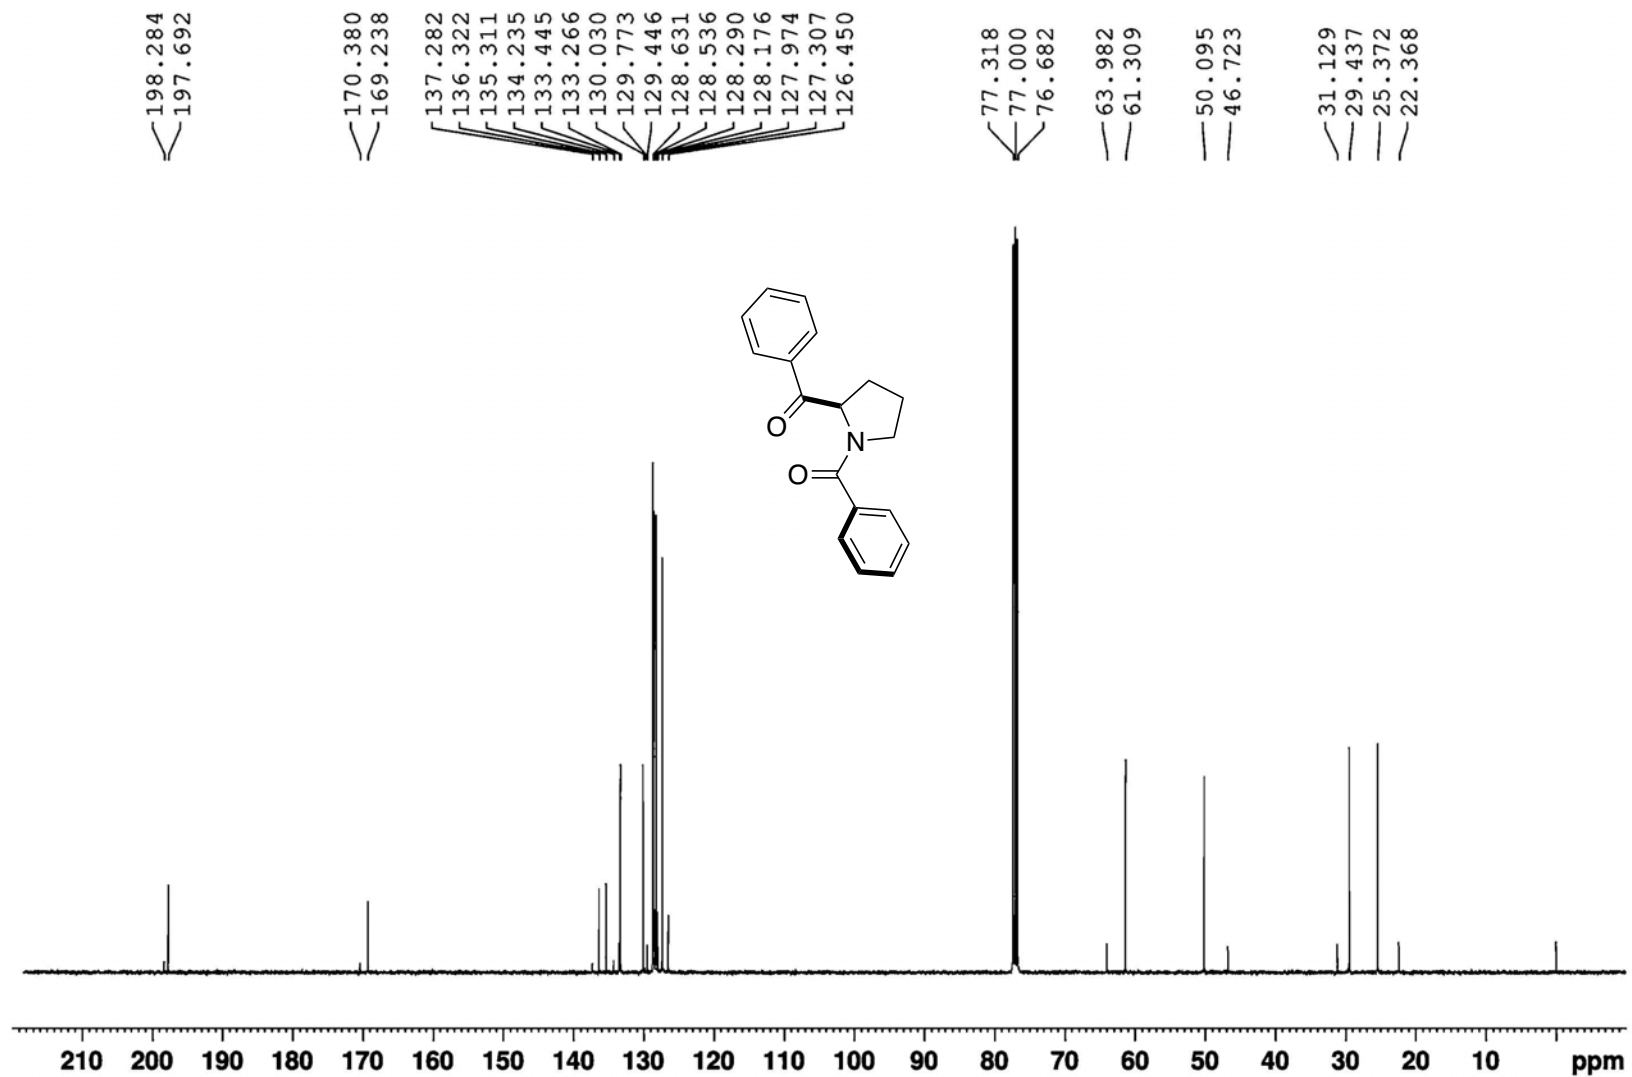

Supplementary Fig. 160 | <sup>13</sup>C NMR spectrum of 8aa-C

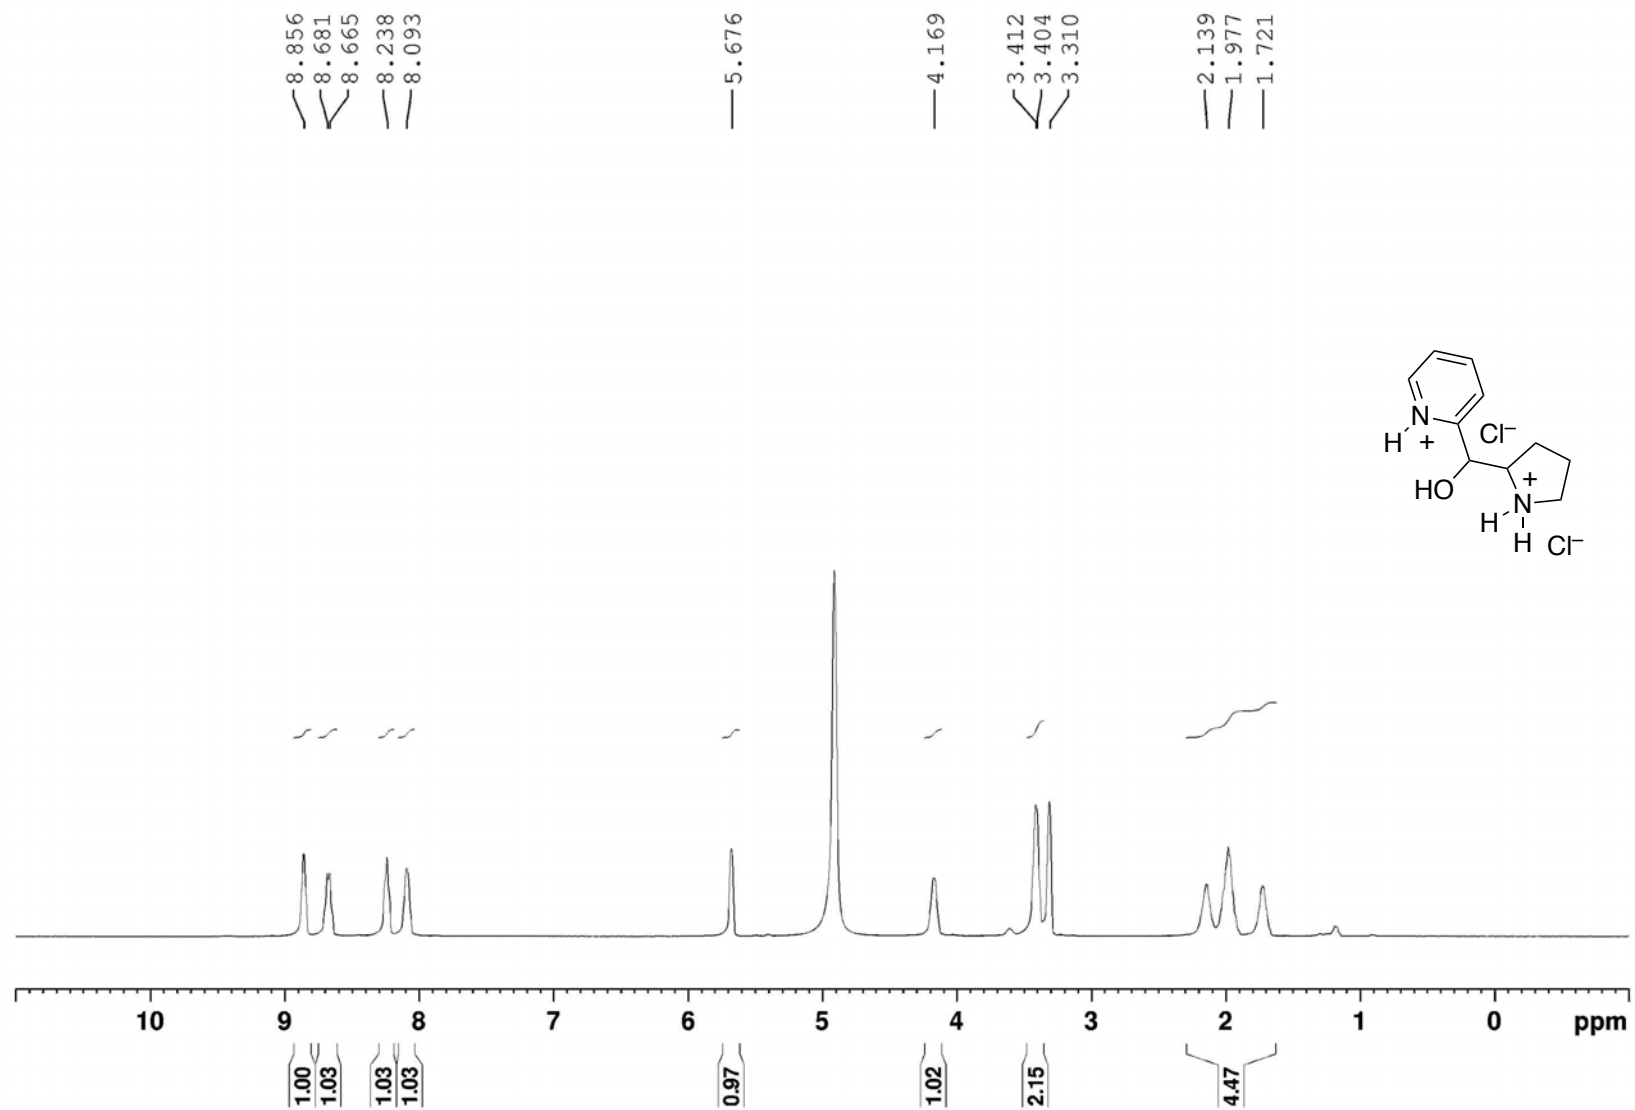

Supplementary Fig. 161 | <sup>1</sup>H NMR spectrum of 9ma

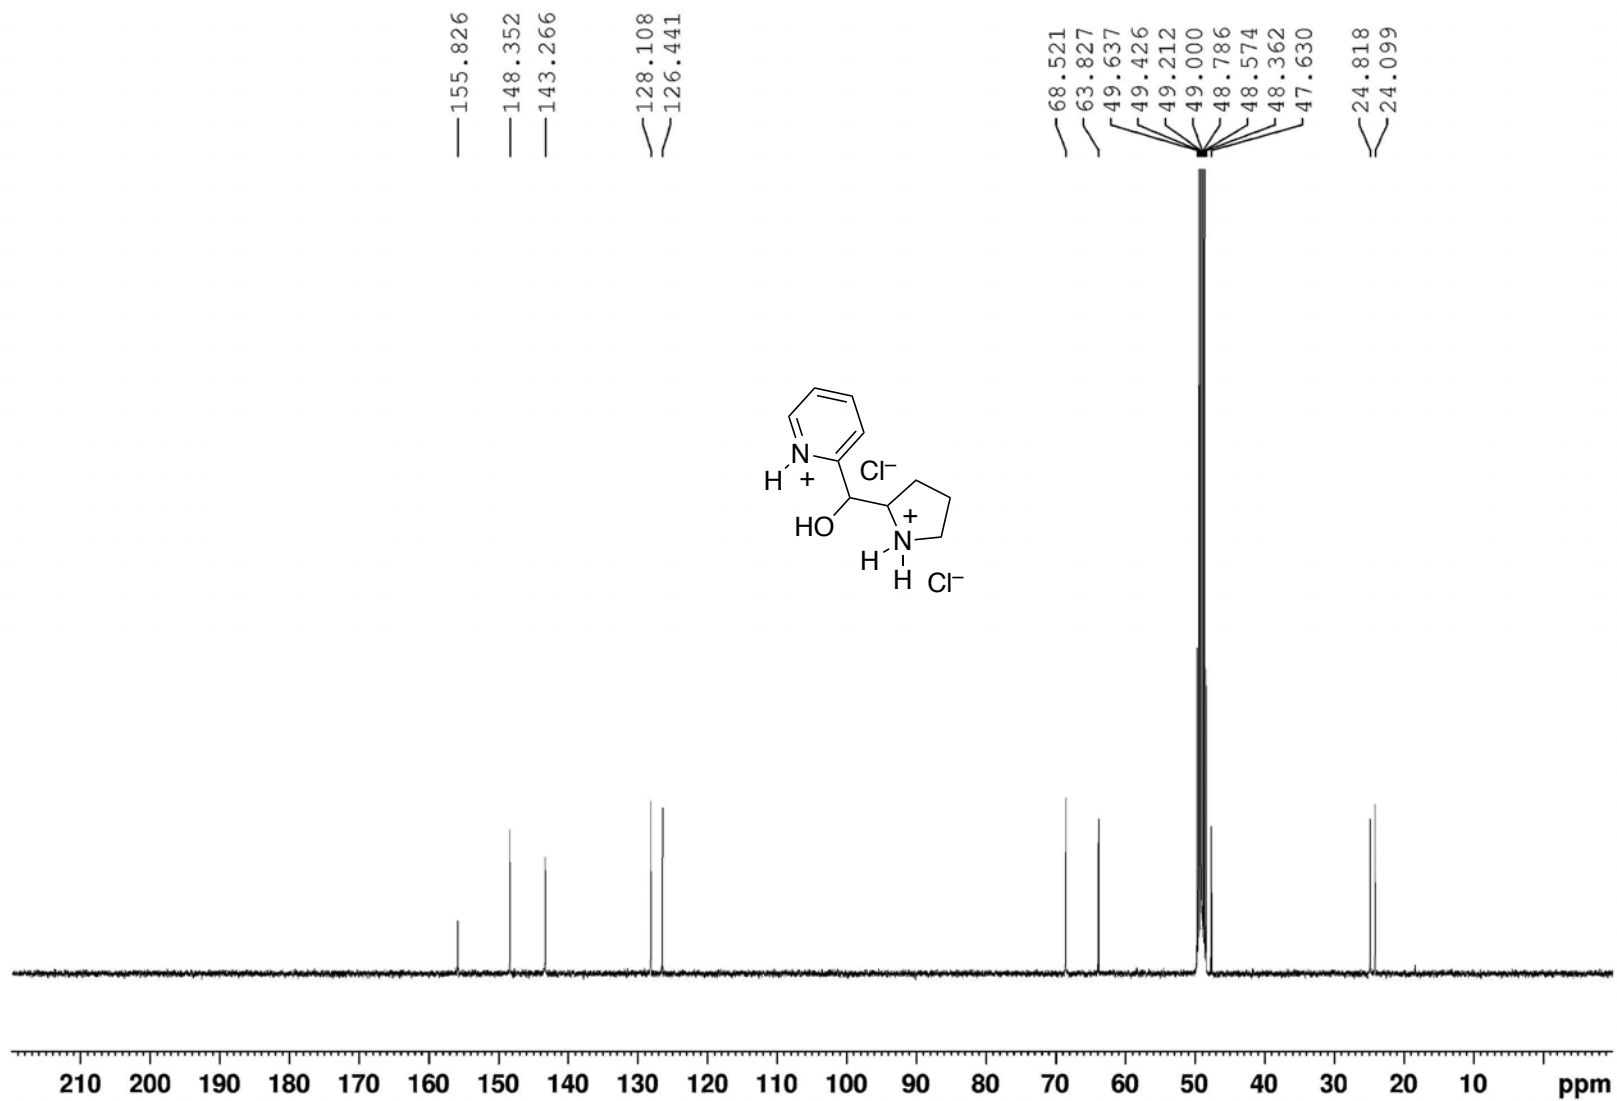

Supplementary Fig. 162 | <sup>13</sup>C NMR spectrum of 9ma

## ■ Supplementary References ■

- (1) Piel, I., Pawelczyk, M. D., Hirano, K., Fröhlich, R., Glorius, F. A Family of Thiazolium Salt Derived N-Heterocyclic Carbenes (NHCs) for Organocatalysis: Synthesis, Investigation and Application in Cross-Benzoin Condensation. *Eur. J. Org. Chem.* **2011**, 5475–5484 (2011).
- (2) Rong, M.-G., Qin, T.-Z., Zi, W., Rhenium-Catalyzed Intramolecular Carboalkoxylation and Carboamination of Alkynes for the Synthesis of C3-Substituted Benzofurans and Indoles. *Org. Lett.* **21**, 5421–5425 (2019).
- (3) Stark, T., Suhartono, M., Göbel, M. W., Lautens, M. A Palladium-Catalyzed Domino Reaction as Key Step for the Synthesis of Functionalized Aromatic Amino Acids. *Synlett* **24**, 2730–2734 (2013).
- (4) Shao, M., Dongare, P., Dawe, L. N., Thompson, D. W., Zhao Y. Biscrown-Annulated TTFAQ–Dianthracene Hybrid: Synthesis, Structure, and Metal Ion Sensing. *Org. Lett.* **12**, 3050–3053 (2010).
- (5) Feng, X., Li, L., Yu, X., Yamamoto, Y., Ming Bao, M.; Copper-catalyzed conversion of aryl and heteroaryl bromides into the corresponding iodide. *Catal. Today.* **274**, 129–132 (2016).
- (6) Górski, K., Mech-Piskorz, J., Leśniewska, B., Pietraszkiewicz, O., Pietraszkiewicz, M., Synthesis and Reactivity of 5-Heterotruzenes Containing Sulfur or Nitrogen as the Heteroatom. *J. Org. Chem.* **84**, 11553–11561 (2019).
- (7) Hrobárik, P., Hrobáriková, V., Sigmundová, I., Zahradník, P., Fakis, M., Polyzos, I., Persephonis, P. Benzothiazoles with Tunable Electron-Withdrawing Strength and Reverse Polarity: A Route to Triphenylamine-Based Chromophores with Enhanced Two-Photon Absorption. *J. Org. Chem.* **76**, 8726–8736 (2011).
- (8) Li, J., Chen, J., Sang, R., Ham, W.-S., Plutschack, M. B., Berger, F., Chhabra, S., Schnegg, A., Genicot, C., Ritter, T. Photoredox catalysis with aryl sulfonium salts enables site-selective late-stage fluorination. *Nat. Chem.* **12**, 56–62 (2020).
- (9) Guilbault, A.-A., Legault, C. Y. Drastic Enhancement of Activity in Iodane-Based  $\alpha$ -Tosyloxylation of Ketones: Iodine(III) Does the Hypervalent Twist. *ACS Catal.* **2**, 219–222 (2012).
- (10) Hie, L., Nathel, N. F. F., Shah, T. K., Baker, E. L., Hong, X., Yang, Y.-F., Liu, P., Houk, K. N., Garg, N. K. Conversion of amides to esters by the nickel-catalysed activation of amide C–N bonds. *Nature* **524**, 79–83 (2015).
- (11) Kabadwal, L. M., Das, J., Banerjee, D., Mn(II)-catalysed alkylation of methylene ketones with alcohols: direct access to functionalised branched products. *Chem. Commun.* **54**, 14069–14072 (2018).
- (12) Gaussian 09, Revision D.01, M. J. Frisch, G. W. Trucks, H. B. Schlegel, G. E. Scuseria, M. A. Robb, J. R. Cheeseman, G. Scalmani, V. Barone, B. Mennucci, G. A. Petersson, H. Nakatsuji, M. Caricato, X. Li, H. P. Hratchian, A. F. Izmaylov, J. Bloino, G. Zheng, J. L. Sonnenberg, M. Hada, M. Ehara, K. Toyota, R. Fukuda, J. Hasegawa, M. Ishida, T. Nakajima, Y. Honda, O. Kitao, H. Nakai, T. Vreven, J. A. Montgomery, Jr., J. E. Peralta, F. Ogliaro, M. Bearpark, J. J. Heyd, E. Brothers, K. N. Kudin, V. N. Staroverov, T. Keith, R. Kobayashi, J. Normand, K. Raghavachari, A. Rendell, J. C. Burant, S. S. Iyengar, J. Tomasi, M. Cossi, N. Rega, J. M. Millam, M. Klene, J. E. Knox, J. B. Cross, V. Bakken, C. Adamo, J. Jaramillo, R. Gomperts, R. E. Stratmann, O.

Yazyev, A. J. Austin, R. Cammi, C. Pomelli, J. W. Ochterski, R. L. Martin, K. Morokuma, V. G. Zakrzewski, G. A. Voth, P. Salvador, J. J. Dannenberg, S. Dapprich, A. D. Daniels, O. Farkas, J. B. Foresman, J. V. Ortiz, J. Cioslowski, and D. J. Fox, Gaussian, Inc., Wallingford CT, 2013

- (13)(a) Becke, A. D. A new mixing of Hartree–Fock and local density-functional theories. *J. Chem. Phys.* **98**, 1372–1377 (1993). (b) Becke, A. D. Density-functional thermochemistry. III. The role of exact exchange. *J. Chem. Phys.* **98**, 5648–5652 (1993). (c) Lee, C., Yang, W., Parr, R. G. Development of the Colle-Salvetti correlation-energy formula into a functional of the electron density. *Phys. Rev. B.* **37**, 785–789 (1988). (d) Stephens, P. J., Devlin, F. J., Chabalowski, C. F., Frisch, M. J. Ab Initio Calculation of Vibrational Absorption and Circular Dichroism Spectra Using Density Functional Force Fields. *J. Phys. Chem.* **98**, 11623–11627 (1994).
- (14) Hay, P. J., Wadt, W. R. Ab initio effective core potentials for molecular calculations. Potentials for the transition metal atoms Sc to Hg. *J. Chem. Phys.* **82**, 270–283 (1985).
- (15) Spletstoser, J. T., White, J. M., Tunoori, A. R., Georg, G. I. Mild and Selective Hydrozirconation of Amides to Aldehydes Using Cp<sub>2</sub>Zr(H)Cl: Scope and Mechanistic Insight. *J. Am. Chem. Soc.* **129**, 3408–3419 (2007).
- (16) Mattson, A. E., Zuhl, A. M., Reynolds, T. E., Scheidt, K. A. Direct Nucleophilic Acylation of Nitroalkenes Promoted by a Fluoride Anion/Thiourea Combination. *J. Am. Chem. Soc.* **128**, 4932–4933 (2006).
- (17) Chiu, C. C., Jordan, F. Modeling an Elementary Step of the Enzyme Pyruvate Oxidase: Oxidation of a Thiamin Diphosphate-Bound Enamine Intermediate by a Flavin Analog. *J. Am. Chem. Soc.* **117**, 7027–7028 (1995).
- (18) Nakanishi, I., Itoh, S., Suenobu, T., Fukuzumi, S. Electron transfer properties of active aldehydes derived from thiamin coenzyme analogues. *Chem. Commun.* 1927–1928 (1997).
